# Supplementary material for: Mechanism of Action of a Chinese Herbal Compound Containing Quercetin, Luteolin, and Kaempferol in the Treatment of Vitiligo Based on Network Pharmacology and Experimental Verification
Source: Evid Based Complement Alternat Med. 2022 Dec 16;2022:7197533. doi: 10.1155/2022/7197533 (PMC9788887; doi:10.1155/2022/7197533)
Supplement: Supplementary Materials — Supplementary Table 1. Compounds and related targets genes of Baishi Tablet. Supplementary Table 2A. Summarized vitiligo-related genes. Supplementary Table 2B. Vitiligo-related genes from five database respectively. Supplementary Table 2C. The interacting genes between vitiligo and Baishi tablet. Supplementary 3. Go enrichment analysis results. Supplementary 4. Protein-protein interaction network results. Supplementary 5. Description about compound-vitiligo-target network. [file 7197533.f1.zip]

Archive with 7 entries (7 files):
- Suppl 1 Compound-Target.txt
- Suppl 2A vitiligo-related genes.txt
- Suppl 2B veen-disease.txt
- Suppl 2C veen-Drug_Disease.txt
- Suppl 3 GOresult.txt
- Suppl 4 PPI.txt
- Suppl 5 network.txt
