# Supplementary material for: Mechanism of Action of a Chinese Herbal Compound Containing Quercetin, Luteolin, and Kaempferol in the Treatment of Vitiligo Based on Network Pharmacology and Experimental Verification
Source: Evid Based Complement Alternat Med. 2022 Dec 16;2022:7197533. doi: 10.1155/2022/7197533 (PMC9788887; doi:10.1155/2022/7197533)
Supplement: Supplementary Materials — Supplementary Table 1. Compounds and related targets genes of Baishi Tablet. Supplementary Table 2A. Summarized vitiligo-related genes. Supplementary Table 2B. Vitiligo-related genes from five database respectively. Supplementary Table 2C. The interacting genes between vitiligo and Baishi tablet. Supplementary 3. Go enrichment analysis results. Supplementary 4. Protein-protein interaction network results. Supplementary 5. Description about compound-vitiligo-target network. [file 7197533.f1.zip › Suppl 1 Compound-Target.txt]

Drug	MolId	MolName	Symbol
baishao	MOL001919	(3S,5R,8R,9R,10S,14S)-3,17-dihydroxy-4,4,8,10,14-pentamethyl-2,3,5,6,7,9-hexahydro-1H-cyclopenta[a]phenanthrene-15,16-dione	PGR
baishao	MOL001919	(3S,5R,8R,9R,10S,14S)-3,17-dihydroxy-4,4,8,10,14-pentamethyl-2,3,5,6,7,9-hexahydro-1H-cyclopenta[a]phenanthrene-15,16-dione	NR3C2
baishao	MOL001924	paeoniflorin	TNFAIP6
baishao	MOL001924	paeoniflorin	IL6
baishao	MOL001924	paeoniflorin	CD14
baishao	MOL001924	paeoniflorin	LBP
baishao	MOL000211	Mairin	PGR
baishao	MOL000358	beta-sitosterol	PGR
baishao	MOL000358	beta-sitosterol	NCOA2
baishao	MOL000358	beta-sitosterol	PTGS1
baishao	MOL000358	beta-sitosterol	PTGS2
baishao	MOL000358	beta-sitosterol	HSP90AA1
baishao	MOL000358	beta-sitosterol	KCNH2
baishao	MOL000358	beta-sitosterol	PRKACA
baishao	MOL000358	beta-sitosterol	DRD1
baishao	MOL000358	beta-sitosterol	CHRM3
baishao	MOL000358	beta-sitosterol	CHRM1
baishao	MOL000358	beta-sitosterol	SCN5A
baishao	MOL000358	beta-sitosterol	CHRM4
baishao	MOL000358	beta-sitosterol	PDE3A
baishao	MOL000358	beta-sitosterol	ADRA1A
baishao	MOL000358	beta-sitosterol	CHRM2
baishao	MOL000358	beta-sitosterol	ADRA1B
baishao	MOL000358	beta-sitosterol	ADRB2
baishao	MOL000358	beta-sitosterol	CHRNA2
baishao	MOL000358	beta-sitosterol	SLC6A4
baishao	MOL000358	beta-sitosterol	OPRM1
baishao	MOL000358	beta-sitosterol	CHRNA7
baishao	MOL000358	beta-sitosterol	BCL2
baishao	MOL000358	beta-sitosterol	BAX
baishao	MOL000358	beta-sitosterol	CASP9
baishao	MOL000358	beta-sitosterol	JUN
baishao	MOL000358	beta-sitosterol	CASP3
baishao	MOL000358	beta-sitosterol	CASP8
baishao	MOL000358	beta-sitosterol	PRKCA
baishao	MOL000358	beta-sitosterol	PON1
baishao	MOL000358	beta-sitosterol	MAP2
baishao	MOL000359	sitosterol	PGR
baishao	MOL000359	sitosterol	NCOA2
baishao	MOL000359	sitosterol	NR3C2
baishao	MOL000422	kaempferol	NOS2
baishao	MOL000422	kaempferol	PTGS1
baishao	MOL000422	kaempferol	AR
baishao	MOL000422	kaempferol	PPARG
baishao	MOL000422	kaempferol	PTGS2
baishao	MOL000422	kaempferol	HSP90AA1
baishao	MOL000422	kaempferol	PRKACA
baishao	MOL000422	kaempferol	NCOA2
baishao	MOL000422	kaempferol	DPP4
baishao	MOL000422	kaempferol	PRSS1
baishao	MOL000422	kaempferol	PGR
baishao	MOL000422	kaempferol	F2
baishao	MOL000422	kaempferol	CHRM1
baishao	MOL000422	kaempferol	ACHE
baishao	MOL000422	kaempferol	SLC6A2
baishao	MOL000422	kaempferol	CHRM2
baishao	MOL000422	kaempferol	ADRA1B
baishao	MOL000422	kaempferol	TOP2A
baishao	MOL000422	kaempferol	F7
baishao	MOL000422	kaempferol	CALM1
baishao	MOL000422	kaempferol	RELA
baishao	MOL000422	kaempferol	IKBKB
baishao	MOL000422	kaempferol	AKT1
baishao	MOL000422	kaempferol	BCL2
baishao	MOL000422	kaempferol	BAX
baishao	MOL000422	kaempferol	TNFAIP6
baishao	MOL000422	kaempferol	JUN
baishao	MOL000422	kaempferol	AHSA1
baishao	MOL000422	kaempferol	CASP3
baishao	MOL000422	kaempferol	MAPK8
baishao	MOL000422	kaempferol	MMP1
baishao	MOL000422	kaempferol	STAT1
baishao	MOL000422	kaempferol	CDK1
baishao	MOL000422	kaempferol	PPARG
baishao	MOL000422	kaempferol	HMOX1
baishao	MOL000422	kaempferol	CYP3A4
baishao	MOL000422	kaempferol	SERTAD1
baishao	MOL000422	kaempferol	CYP1A1
baishao	MOL000422	kaempferol	ICAM1
baishao	MOL000422	kaempferol	SELE
baishao	MOL000422	kaempferol	VCAM1
baishao	MOL000422	kaempferol	NR1I2
baishao	MOL000422	kaempferol	CYP1B1
baishao	MOL000422	kaempferol	ALOX5
baishao	MOL000422	kaempferol	HAS2
baishao	MOL000422	kaempferol	AHR
baishao	MOL000422	kaempferol	PSMD3
baishao	MOL000422	kaempferol	SLC2A4
baishao	MOL000422	kaempferol	NR1I3
baishao	MOL000422	kaempferol	INSR
baishao	MOL000422	kaempferol	DIO1
baishao	MOL000422	kaempferol	PPP3CA
baishao	MOL000422	kaempferol	GSTM1
baishao	MOL000422	kaempferol	GSTM2
baishao	MOL000422	kaempferol	AKR1C3
baishao	MOL000422	kaempferol	SLPI
baishao	MOL000492	(+)-catechin	PTGS1
baishao	MOL000492	(+)-catechin	ESR1
baishao	MOL000492	(+)-catechin	PTGS2
baishao	MOL000492	(+)-catechin	HSP90AA1
baishao	MOL000492	(+)-catechin	DPEP1
baishao	MOL000492	(+)-catechin	PRKACA
baishao	MOL000492	(+)-catechin	NCOA2
baishao	MOL000492	(+)-catechin	CALM1
baishao	MOL000492	(+)-catechin	RXRA
baishao	MOL000492	(+)-catechin	SERTAD1
baishao	MOL000492	(+)-catechin	HAS2
chaihu	MOL001645	Linoleyl acetate	PTGS1
chaihu	MOL001645	Linoleyl acetate	PTGS2
chaihu	MOL001645	Linoleyl acetate	NCOA2
chaihu	MOL001645	Linoleyl acetate	RXRA
chaihu	MOL002776	Baicalin	F10
chaihu	MOL002776	Baicalin	PTPN1
chaihu	MOL000449	Stigmasterol	PGR
chaihu	MOL000449	Stigmasterol	NR3C2
chaihu	MOL000449	Stigmasterol	NCOA2
chaihu	MOL000449	Stigmasterol	SERTAD1
chaihu	MOL000449	Stigmasterol	IGHG1
chaihu	MOL000449	Stigmasterol	RXRA
chaihu	MOL000449	Stigmasterol	NCOA1
chaihu	MOL000449	Stigmasterol	PTGS1
chaihu	MOL000449	Stigmasterol	PTGS2
chaihu	MOL000449	Stigmasterol	ADRA2A
chaihu	MOL000449	Stigmasterol	SLC6A2
chaihu	MOL000449	Stigmasterol	SLC6A3
chaihu	MOL000449	Stigmasterol	ADRB2
chaihu	MOL000449	Stigmasterol	AKR1B1
chaihu	MOL000449	Stigmasterol	PLAU
chaihu	MOL000449	Stigmasterol	LTA4H
chaihu	MOL000449	Stigmasterol	MAOB
chaihu	MOL000449	Stigmasterol	MAOA
chaihu	MOL000449	Stigmasterol	PRKACA
chaihu	MOL000449	Stigmasterol	CTRB1
chaihu	MOL000449	Stigmasterol	CHRM3
chaihu	MOL000449	Stigmasterol	CHRM1
chaihu	MOL000449	Stigmasterol	ADRB1
chaihu	MOL000449	Stigmasterol	SCN5A
chaihu	MOL000449	Stigmasterol	ADRA1A
chaihu	MOL000449	Stigmasterol	CHRM2
chaihu	MOL000449	Stigmasterol	ADRA1B
chaihu	MOL000449	Stigmasterol	CHRNA7
chaihu	MOL000354	isorhamnetin	NOS2
chaihu	MOL000354	isorhamnetin	PTGS1
chaihu	MOL000354	isorhamnetin	ESR1
chaihu	MOL000354	isorhamnetin	AR
chaihu	MOL000354	isorhamnetin	PPARG
chaihu	MOL000354	isorhamnetin	PTGS2
chaihu	MOL000354	isorhamnetin	PTPN1
chaihu	MOL000354	isorhamnetin	ESR2
chaihu	MOL000354	isorhamnetin	DPP4
chaihu	MOL000354	isorhamnetin	MAPK14
chaihu	MOL000354	isorhamnetin	GSK3B
chaihu	MOL000354	isorhamnetin	HSP90AA1
chaihu	MOL000354	isorhamnetin	CDK2
chaihu	MOL000354	isorhamnetin	PRKACA
chaihu	MOL000354	isorhamnetin	PRSS1
chaihu	MOL000354	isorhamnetin	CCNA2
chaihu	MOL000354	isorhamnetin	NCOA2
chaihu	MOL000354	isorhamnetin	CALM1
chaihu	MOL000354	isorhamnetin	PYGM
chaihu	MOL000354	isorhamnetin	PPARD
chaihu	MOL000354	isorhamnetin	CHEK1
chaihu	MOL000354	isorhamnetin	AKR1B1
chaihu	MOL000354	isorhamnetin	NCOA1
chaihu	MOL000354	isorhamnetin	F7
chaihu	MOL000354	isorhamnetin	F2
chaihu	MOL000354	isorhamnetin	ACHE
chaihu	MOL000354	isorhamnetin	MAOB
chaihu	MOL000354	isorhamnetin	GRIA2
chaihu	MOL000354	isorhamnetin	RELA
chaihu	MOL000354	isorhamnetin	NCF1
chaihu	MOL000354	isorhamnetin	OLR1
chaihu	MOL000422	kaempferol	NOS2
chaihu	MOL000422	kaempferol	PTGS1
chaihu	MOL000422	kaempferol	AR
chaihu	MOL000422	kaempferol	PPARG
chaihu	MOL000422	kaempferol	PTGS2
chaihu	MOL000422	kaempferol	HSP90AA1
chaihu	MOL000422	kaempferol	PRKACA
chaihu	MOL000422	kaempferol	NCOA2
chaihu	MOL000422	kaempferol	DPP4
chaihu	MOL000422	kaempferol	PRSS1
chaihu	MOL000422	kaempferol	PGR
chaihu	MOL000422	kaempferol	F2
chaihu	MOL000422	kaempferol	CHRM1
chaihu	MOL000422	kaempferol	ACHE
chaihu	MOL000422	kaempferol	SLC6A2
chaihu	MOL000422	kaempferol	CHRM2
chaihu	MOL000422	kaempferol	ADRA1B
chaihu	MOL000422	kaempferol	TOP2A
chaihu	MOL000422	kaempferol	F7
chaihu	MOL000422	kaempferol	CALM1
chaihu	MOL000422	kaempferol	RELA
chaihu	MOL000422	kaempferol	IKBKB
chaihu	MOL000422	kaempferol	AKT1
chaihu	MOL000422	kaempferol	BCL2
chaihu	MOL000422	kaempferol	BAX
chaihu	MOL000422	kaempferol	TNFAIP6
chaihu	MOL000422	kaempferol	JUN
chaihu	MOL000422	kaempferol	AHSA1
chaihu	MOL000422	kaempferol	CASP3
chaihu	MOL000422	kaempferol	MAPK8
chaihu	MOL000422	kaempferol	MMP1
chaihu	MOL000422	kaempferol	STAT1
chaihu	MOL000422	kaempferol	CDK1
chaihu	MOL000422	kaempferol	PPARG
chaihu	MOL000422	kaempferol	HMOX1
chaihu	MOL000422	kaempferol	CYP3A4
chaihu	MOL000422	kaempferol	SERTAD1
chaihu	MOL000422	kaempferol	CYP1A1
chaihu	MOL000422	kaempferol	ICAM1
chaihu	MOL000422	kaempferol	SELE
chaihu	MOL000422	kaempferol	VCAM1
chaihu	MOL000422	kaempferol	NR1I2
chaihu	MOL000422	kaempferol	CYP1B1
chaihu	MOL000422	kaempferol	ALOX5
chaihu	MOL000422	kaempferol	HAS2
chaihu	MOL000422	kaempferol	AHR
chaihu	MOL000422	kaempferol	PSMD3
chaihu	MOL000422	kaempferol	SLC2A4
chaihu	MOL000422	kaempferol	NR1I3
chaihu	MOL000422	kaempferol	INSR
chaihu	MOL000422	kaempferol	DIO1
chaihu	MOL000422	kaempferol	PPP3CA
chaihu	MOL000422	kaempferol	GSTM1
chaihu	MOL000422	kaempferol	GSTM2
chaihu	MOL000422	kaempferol	AKR1C3
chaihu	MOL000422	kaempferol	SLPI
chaihu	MOL004598	3,5,6,7-tetramethoxy-2-(3,4,5-trimethoxyphenyl)chromone	F2
chaihu	MOL004598	3,5,6,7-tetramethoxy-2-(3,4,5-trimethoxyphenyl)chromone	ESR1
chaihu	MOL004598	3,5,6,7-tetramethoxy-2-(3,4,5-trimethoxyphenyl)chromone	AR
chaihu	MOL004598	3,5,6,7-tetramethoxy-2-(3,4,5-trimethoxyphenyl)chromone	F10
chaihu	MOL004598	3,5,6,7-tetramethoxy-2-(3,4,5-trimethoxyphenyl)chromone	PTGS2
chaihu	MOL004598	3,5,6,7-tetramethoxy-2-(3,4,5-trimethoxyphenyl)chromone	F7
chaihu	MOL004598	3,5,6,7-tetramethoxy-2-(3,4,5-trimethoxyphenyl)chromone	ACHE
chaihu	MOL004598	3,5,6,7-tetramethoxy-2-(3,4,5-trimethoxyphenyl)chromone	TOP2A
chaihu	MOL004598	3,5,6,7-tetramethoxy-2-(3,4,5-trimethoxyphenyl)chromone	ESR2
chaihu	MOL004598	3,5,6,7-tetramethoxy-2-(3,4,5-trimethoxyphenyl)chromone	PRSS1
chaihu	MOL004598	3,5,6,7-tetramethoxy-2-(3,4,5-trimethoxyphenyl)chromone	NCOA2
chaihu	MOL004598	3,5,6,7-tetramethoxy-2-(3,4,5-trimethoxyphenyl)chromone	CALM1
chaihu	MOL004609	Areapillin	NOS2
chaihu	MOL004609	Areapillin	F2
chaihu	MOL004609	Areapillin	AR
chaihu	MOL004609	Areapillin	SCN5A
chaihu	MOL004609	Areapillin	F10
chaihu	MOL004609	Areapillin	PTGS2
chaihu	MOL004609	Areapillin	F7
chaihu	MOL004609	Areapillin	PTPN1
chaihu	MOL004609	Areapillin	TOP2A
chaihu	MOL004609	Areapillin	ESR2
chaihu	MOL004609	Areapillin	DPP4
chaihu	MOL004609	Areapillin	HSP90AA1
chaihu	MOL004609	Areapillin	IGHG1
chaihu	MOL004609	Areapillin	PRSS1
chaihu	MOL004609	Areapillin	NCOA2
chaihu	MOL004609	Areapillin	NCOA1
chaihu	MOL004609	Areapillin	CALM1
chaihu	MOL013187	Cubebin	PTGS1
chaihu	MOL013187	Cubebin	F10
chaihu	MOL013187	Cubebin	PTGS2
chaihu	MOL013187	Cubebin	ADRB2
chaihu	MOL013187	Cubebin	HSP90AA1
chaihu	MOL004624	Longikaurin A	CHRM1
chaihu	MOL004624	Longikaurin A	CHRM2
chaihu	MOL004624	Longikaurin A	PRSS1
chaihu	MOL004653	(+)-Anomalin	F2
chaihu	MOL004653	(+)-Anomalin	KCNH2
chaihu	MOL004653	(+)-Anomalin	F10
chaihu	MOL004653	(+)-Anomalin	PTGS2
chaihu	MOL004653	(+)-Anomalin	TOP2A
chaihu	MOL004653	(+)-Anomalin	DPP4
chaihu	MOL004718	��-spinasterol	PGR
chaihu	MOL004718	��-spinasterol	NR3C2
chaihu	MOL004718	��-spinasterol	NCOA2
chaihu	MOL000490	petunidin	NOS2
chaihu	MOL000490	petunidin	PTGS1
chaihu	MOL000490	petunidin	PTGS2
chaihu	MOL000490	petunidin	ESR2
chaihu	MOL000490	petunidin	MAPK14
chaihu	MOL000490	petunidin	GSK3B
chaihu	MOL000490	petunidin	HSP90AA1
chaihu	MOL000490	petunidin	NCOA2
chaihu	MOL000098	quercetin	PTGS1
chaihu	MOL000098	quercetin	AR
chaihu	MOL000098	quercetin	PPARG
chaihu	MOL000098	quercetin	PTGS2
chaihu	MOL000098	quercetin	HSP90AA1
chaihu	MOL000098	quercetin	NCOA2
chaihu	MOL000098	quercetin	DPP4
chaihu	MOL000098	quercetin	AKR1B1
chaihu	MOL000098	quercetin	PRSS1
chaihu	MOL000098	quercetin	TOP2A
chaihu	MOL000098	quercetin	F2
chaihu	MOL000098	quercetin	KCNH2
chaihu	MOL000098	quercetin	SCN5A
chaihu	MOL000098	quercetin	F10
chaihu	MOL000098	quercetin	ADRB2
chaihu	MOL000098	quercetin	MMP3
chaihu	MOL000098	quercetin	PRKACA
chaihu	MOL000098	quercetin	F7
chaihu	MOL000098	quercetin	RXRA
chaihu	MOL000098	quercetin	ACHE
chaihu	MOL000098	quercetin	MAOB
chaihu	MOL000098	quercetin	RELA
chaihu	MOL000098	quercetin	EGFR
chaihu	MOL000098	quercetin	AKT1
chaihu	MOL000098	quercetin	SERTAD1
chaihu	MOL000098	quercetin	CCND1
chaihu	MOL000098	quercetin	BCL2
chaihu	MOL000098	quercetin	BCL2L1
chaihu	MOL000098	quercetin	FOS
chaihu	MOL000098	quercetin	CDKN1A
chaihu	MOL000098	quercetin	EIF6
chaihu	MOL000098	quercetin	BAX
chaihu	MOL000098	quercetin	CASP9
chaihu	MOL000098	quercetin	PLAU
chaihu	MOL000098	quercetin	MMP2
chaihu	MOL000098	quercetin	MMP9
chaihu	MOL000098	quercetin	MAPK1
chaihu	MOL000098	quercetin	IL10RB
chaihu	MOL000098	quercetin	RB1
chaihu	MOL000098	quercetin	TNFAIP6
chaihu	MOL000098	quercetin	JUN
chaihu	MOL000098	quercetin	IL6
chaihu	MOL000098	quercetin	AHSA1
chaihu	MOL000098	quercetin	CASP3
chaihu	MOL000098	quercetin	TP53
chaihu	MOL000098	quercetin	ELK1
chaihu	MOL000098	quercetin	NFKBIA
chaihu	MOL000098	quercetin	ODC1
chaihu	MOL000098	quercetin	CASP8
chaihu	MOL000098	quercetin	TOP1
chaihu	MOL000098	quercetin	RAF1
chaihu	MOL000098	quercetin	SOD1
chaihu	MOL000098	quercetin	PRKCA
chaihu	MOL000098	quercetin	MMP1
chaihu	MOL000098	quercetin	HIF1A
chaihu	MOL000098	quercetin	STAT1
chaihu	MOL000098	quercetin	RUNX1T1
chaihu	MOL000098	quercetin	CDK1
chaihu	MOL000098	quercetin	HSPA5
chaihu	MOL000098	quercetin	ERBB2
chaihu	MOL000098	quercetin	PPARG
chaihu	MOL000098	quercetin	ACACA
chaihu	MOL000098	quercetin	HMOX1
chaihu	MOL000098	quercetin	CYP3A4
chaihu	MOL000098	quercetin	CAV1
chaihu	MOL000098	quercetin	MYC
chaihu	MOL000098	quercetin	F3
chaihu	MOL000098	quercetin	GJA1
chaihu	MOL000098	quercetin	CYP1A1
chaihu	MOL000098	quercetin	ICAM1
chaihu	MOL000098	quercetin	IL1B
chaihu	MOL000098	quercetin	CCL2
chaihu	MOL000098	quercetin	SELE
chaihu	MOL000098	quercetin	VCAM1
chaihu	MOL000098	quercetin	CXCL8
chaihu	MOL000098	quercetin	PRKCB
chaihu	MOL000098	quercetin	BIRC5
chaihu	MOL000098	quercetin	DUOX2
chaihu	MOL000098	quercetin	NOS3
chaihu	MOL000098	quercetin	HSPB1
chaihu	MOL000098	quercetin	MGAM
chaihu	MOL000098	quercetin	IL2
chaihu	MOL000098	quercetin	NR1I2
chaihu	MOL000098	quercetin	CYP1B1
chaihu	MOL000098	quercetin	CCNB1
chaihu	MOL000098	quercetin	PLAT
chaihu	MOL000098	quercetin	THBD
chaihu	MOL000098	quercetin	SERPINE1
chaihu	MOL000098	quercetin	IFNG
chaihu	MOL000098	quercetin	ALOX5
chaihu	MOL000098	quercetin	IL1A
chaihu	MOL000098	quercetin	MPO
chaihu	MOL000098	quercetin	TOP2A
chaihu	MOL000098	quercetin	NCF1
chaihu	MOL000098	quercetin	ABCG2
chaihu	MOL000098	quercetin	HAS2
chaihu	MOL000098	quercetin	NFE2L2
chaihu	MOL000098	quercetin	NQO1
chaihu	MOL000098	quercetin	PARP1
chaihu	MOL000098	quercetin	AHR
chaihu	MOL000098	quercetin	PSMD3
chaihu	MOL000098	quercetin	SLC2A4
chaihu	MOL000098	quercetin	COL3A1
chaihu	MOL000098	quercetin	CXCL11
chaihu	MOL000098	quercetin	CXCL2
chaihu	MOL000098	quercetin	DCAF5
chaihu	MOL000098	quercetin	NR1I3
chaihu	MOL000098	quercetin	CHEK2
chaihu	MOL000098	quercetin	INSR
chaihu	MOL000098	quercetin	CLDN4
chaihu	MOL000098	quercetin	PPARA
chaihu	MOL000098	quercetin	PPARD
chaihu	MOL000098	quercetin	HSF1
chaihu	MOL000098	quercetin	CRP
chaihu	MOL000098	quercetin	CXCL10
chaihu	MOL000098	quercetin	CHUK
chaihu	MOL000098	quercetin	SPP1
chaihu	MOL000098	quercetin	RUNX2
chaihu	MOL000098	quercetin	RASSF1
chaihu	MOL000098	quercetin	E2F1
chaihu	MOL000098	quercetin	E2F2
chaihu	MOL000098	quercetin	ACP3
chaihu	MOL000098	quercetin	CTSD
chaihu	MOL000098	quercetin	IGFBP3
chaihu	MOL000098	quercetin	IGF2
chaihu	MOL000098	quercetin	CD40LG
chaihu	MOL000098	quercetin	IRF1
chaihu	MOL000098	quercetin	ERBB3
chaihu	MOL000098	quercetin	PON1
chaihu	MOL000098	quercetin	DIO1
chaihu	MOL000098	quercetin	PCOLCE
chaihu	MOL000098	quercetin	NPEPPS
chaihu	MOL000098	quercetin	HK2
chaihu	MOL000098	quercetin	RASA1
chaihu	MOL000098	quercetin	GSTM1
chaihu	MOL000098	quercetin	GSTM2
chishao	MOL001002	ellagic acid	CDK2
chishao	MOL001002	ellagic acid	ESR1
chishao	MOL001002	ellagic acid	AR
chishao	MOL001002	ellagic acid	PGR
chishao	MOL001002	ellagic acid	HSP90AA1
chishao	MOL001002	ellagic acid	RELA
chishao	MOL001002	ellagic acid	SERTAD1
chishao	MOL001002	ellagic acid	CDKN1A
chishao	MOL001002	ellagic acid	MMP2
chishao	MOL001002	ellagic acid	MMP9
chishao	MOL001002	ellagic acid	NFKBIA
chishao	MOL001002	ellagic acid	CXCL8
chishao	MOL001002	ellagic acid	PRKCB
chishao	MOL001002	ellagic acid	IGF2
chishao	MOL001002	ellagic acid	GSTM1
chishao	MOL001002	ellagic acid	GSTM2
chishao	MOL001002	ellagic acid	GSTA2
chishao	MOL001924	paeoniflorin	TNFAIP6
chishao	MOL001924	paeoniflorin	IL6
chishao	MOL001924	paeoniflorin	CD14
chishao	MOL001924	paeoniflorin	LBP
chishao	MOL002714	baicalein	PTGS1
chishao	MOL002714	baicalein	AR
chishao	MOL002714	baicalein	PTGS2
chishao	MOL002714	baicalein	HSP90AA1
chishao	MOL002714	baicalein	PRKACA
chishao	MOL002714	baicalein	DPP4
chishao	MOL002714	baicalein	PDE3A
chishao	MOL002714	baicalein	PRSS1
chishao	MOL002714	baicalein	NCOA2
chishao	MOL002714	baicalein	NCOA1
chishao	MOL002714	baicalein	CALM1
chishao	MOL002714	baicalein	RELA
chishao	MOL002714	baicalein	AKT1
chishao	MOL002714	baicalein	SERTAD1
chishao	MOL002714	baicalein	BCL2
chishao	MOL002714	baicalein	FOS
chishao	MOL002714	baicalein	BAX
chishao	MOL002714	baicalein	MMP9
chishao	MOL002714	baicalein	CASP3
chishao	MOL002714	baicalein	TP53
chishao	MOL002714	baicalein	HIF1A
chishao	MOL002714	baicalein	FOSL1
chishao	MOL002714	baicalein	FOSL2
chishao	MOL002714	baicalein	CDK1
chishao	MOL002714	baicalein	CCNB1
chishao	MOL002714	baicalein	MPO
chishao	MOL002714	baicalein	AHR
chishao	MOL002714	baicalein	IGF2
chishao	MOL002714	baicalein	CYCS
chishao	MOL002714	baicalein	NFATC1
chishao	MOL002714	baicalein	TDRD7
chishao	MOL002714	baicalein	EGLN1
chishao	MOL002714	baicalein	NOX5
chishao	MOL002714	baicalein	FABP5
chishao	MOL002714	baicalein	APOD
chishao	MOL002776	Baicalin	F10
chishao	MOL002776	Baicalin	PTPN1
chishao	MOL000358	beta-sitosterol	PGR
chishao	MOL000358	beta-sitosterol	NCOA2
chishao	MOL000358	beta-sitosterol	PTGS1
chishao	MOL000358	beta-sitosterol	PTGS2
chishao	MOL000358	beta-sitosterol	HSP90AA1
chishao	MOL000358	beta-sitosterol	KCNH2
chishao	MOL000358	beta-sitosterol	PRKACA
chishao	MOL000358	beta-sitosterol	DRD1
chishao	MOL000358	beta-sitosterol	CHRM3
chishao	MOL000358	beta-sitosterol	CHRM1
chishao	MOL000358	beta-sitosterol	SCN5A
chishao	MOL000358	beta-sitosterol	CHRM4
chishao	MOL000358	beta-sitosterol	PDE3A
chishao	MOL000358	beta-sitosterol	ADRA1A
chishao	MOL000358	beta-sitosterol	CHRM2
chishao	MOL000358	beta-sitosterol	ADRA1B
chishao	MOL000358	beta-sitosterol	ADRB2
chishao	MOL000358	beta-sitosterol	CHRNA2
chishao	MOL000358	beta-sitosterol	SLC6A4
chishao	MOL000358	beta-sitosterol	OPRM1
chishao	MOL000358	beta-sitosterol	CHRNA7
chishao	MOL000358	beta-sitosterol	BCL2
chishao	MOL000358	beta-sitosterol	BAX
chishao	MOL000358	beta-sitosterol	CASP9
chishao	MOL000358	beta-sitosterol	JUN
chishao	MOL000358	beta-sitosterol	CASP3
chishao	MOL000358	beta-sitosterol	CASP8
chishao	MOL000358	beta-sitosterol	PRKCA
chishao	MOL000358	beta-sitosterol	PON1
chishao	MOL000358	beta-sitosterol	MAP2
chishao	MOL000359	sitosterol	PGR
chishao	MOL000359	sitosterol	NCOA2
chishao	MOL000359	sitosterol	NR3C2
chishao	MOL004355	Spinasterol	PGR
chishao	MOL004355	Spinasterol	NR3C2
chishao	MOL004355	Spinasterol	NCOA2
chishao	MOL000449	Stigmasterol	PGR
chishao	MOL000449	Stigmasterol	NR3C2
chishao	MOL000449	Stigmasterol	NCOA2
chishao	MOL000449	Stigmasterol	SERTAD1
chishao	MOL000449	Stigmasterol	IGHG1
chishao	MOL000449	Stigmasterol	RXRA
chishao	MOL000449	Stigmasterol	NCOA1
chishao	MOL000449	Stigmasterol	PTGS1
chishao	MOL000449	Stigmasterol	PTGS2
chishao	MOL000449	Stigmasterol	ADRA2A
chishao	MOL000449	Stigmasterol	SLC6A2
chishao	MOL000449	Stigmasterol	SLC6A3
chishao	MOL000449	Stigmasterol	ADRB2
chishao	MOL000449	Stigmasterol	AKR1B1
chishao	MOL000449	Stigmasterol	PLAU
chishao	MOL000449	Stigmasterol	LTA4H
chishao	MOL000449	Stigmasterol	MAOB
chishao	MOL000449	Stigmasterol	MAOA
chishao	MOL000449	Stigmasterol	PRKACA
chishao	MOL000449	Stigmasterol	CTRB1
chishao	MOL000449	Stigmasterol	CHRM3
chishao	MOL000449	Stigmasterol	CHRM1
chishao	MOL000449	Stigmasterol	ADRB1
chishao	MOL000449	Stigmasterol	SCN5A
chishao	MOL000449	Stigmasterol	ADRA1A
chishao	MOL000449	Stigmasterol	CHRM2
chishao	MOL000449	Stigmasterol	ADRA1B
chishao	MOL000449	Stigmasterol	CHRNA7
chishao	MOL000492	(+)-catechin	PTGS1
chishao	MOL000492	(+)-catechin	ESR1
chishao	MOL000492	(+)-catechin	PTGS2
chishao	MOL000492	(+)-catechin	HSP90AA1
chishao	MOL000492	(+)-catechin	DPEP1
chishao	MOL000492	(+)-catechin	PRKACA
chishao	MOL000492	(+)-catechin	NCOA2
chishao	MOL000492	(+)-catechin	CALM1
chishao	MOL000492	(+)-catechin	RXRA
chishao	MOL000492	(+)-catechin	SERTAD1
chishao	MOL000492	(+)-catechin	HAS2
chishao	MOL006992	(2R,3R)-4-methoxyl-distylin	NOS2
chishao	MOL006992	(2R,3R)-4-methoxyl-distylin	PTGS1
chishao	MOL006992	(2R,3R)-4-methoxyl-distylin	ESR1
chishao	MOL006992	(2R,3R)-4-methoxyl-distylin	PTGS2
chishao	MOL006992	(2R,3R)-4-methoxyl-distylin	HSP90AA1
chishao	MOL006999	stigmast-7-en-3-ol	PGR
chishao	MOL002883	Ethyl oleate (NF)	NCOA2
chishao	MOL005043	campest-5-en-3beta-ol	PGR
xiangfu	MOL003044	Chryseriol	NOS2
xiangfu	MOL003044	Chryseriol	PTGS1
xiangfu	MOL003044	Chryseriol	ESR1
xiangfu	MOL003044	Chryseriol	AR
xiangfu	MOL003044	Chryseriol	PPARG
xiangfu	MOL003044	Chryseriol	PTGS2
xiangfu	MOL003044	Chryseriol	DPP4
xiangfu	MOL003044	Chryseriol	MAPK14
xiangfu	MOL003044	Chryseriol	GSK3B
xiangfu	MOL003044	Chryseriol	HSP90AA1
xiangfu	MOL003044	Chryseriol	CDK2
xiangfu	MOL003044	Chryseriol	CHEK1
xiangfu	MOL003044	Chryseriol	PRKACA
xiangfu	MOL003044	Chryseriol	PRSS1
xiangfu	MOL003044	Chryseriol	NCOA2
xiangfu	MOL003044	Chryseriol	NCOA1
xiangfu	MOL003044	Chryseriol	CALM1
xiangfu	MOL000354	isorhamnetin	NOS2
xiangfu	MOL000354	isorhamnetin	PTGS1
xiangfu	MOL000354	isorhamnetin	ESR1
xiangfu	MOL000354	isorhamnetin	AR
xiangfu	MOL000354	isorhamnetin	PPARG
xiangfu	MOL000354	isorhamnetin	PTGS2
xiangfu	MOL000354	isorhamnetin	PTPN1
xiangfu	MOL000354	isorhamnetin	ESR2
xiangfu	MOL000354	isorhamnetin	DPP4
xiangfu	MOL000354	isorhamnetin	MAPK14
xiangfu	MOL000354	isorhamnetin	GSK3B
xiangfu	MOL000354	isorhamnetin	HSP90AA1
xiangfu	MOL000354	isorhamnetin	CDK2
xiangfu	MOL000354	isorhamnetin	PRKACA
xiangfu	MOL000354	isorhamnetin	PRSS1
xiangfu	MOL000354	isorhamnetin	CCNA2
xiangfu	MOL000354	isorhamnetin	NCOA2
xiangfu	MOL000354	isorhamnetin	CALM1
xiangfu	MOL000354	isorhamnetin	PYGM
xiangfu	MOL000354	isorhamnetin	PPARD
xiangfu	MOL000354	isorhamnetin	CHEK1
xiangfu	MOL000354	isorhamnetin	AKR1B1
xiangfu	MOL000354	isorhamnetin	NCOA1
xiangfu	MOL000354	isorhamnetin	F7
xiangfu	MOL000354	isorhamnetin	F2
xiangfu	MOL000354	isorhamnetin	ACHE
xiangfu	MOL000354	isorhamnetin	MAOB
xiangfu	MOL000354	isorhamnetin	GRIA2
xiangfu	MOL000354	isorhamnetin	RELA
xiangfu	MOL000354	isorhamnetin	NCF1
xiangfu	MOL000354	isorhamnetin	OLR1
xiangfu	MOL003542	8-Isopentenyl-kaempferol	F2
xiangfu	MOL003542	8-Isopentenyl-kaempferol	ESR1
xiangfu	MOL003542	8-Isopentenyl-kaempferol	AR
xiangfu	MOL003542	8-Isopentenyl-kaempferol	PPARG
xiangfu	MOL003542	8-Isopentenyl-kaempferol	F10
xiangfu	MOL003542	8-Isopentenyl-kaempferol	PTGS2
xiangfu	MOL003542	8-Isopentenyl-kaempferol	TOP2A
xiangfu	MOL003542	8-Isopentenyl-kaempferol	DPP4
xiangfu	MOL003542	8-Isopentenyl-kaempferol	GSK3B
xiangfu	MOL003542	8-Isopentenyl-kaempferol	HSP90AA1
xiangfu	MOL003542	8-Isopentenyl-kaempferol	CDK2
xiangfu	MOL003542	8-Isopentenyl-kaempferol	CHEK1
xiangfu	MOL003542	8-Isopentenyl-kaempferol	PRSS1
xiangfu	MOL003542	8-Isopentenyl-kaempferol	CALM1
xiangfu	MOL003542	8-Isopentenyl-kaempferol	PTGS1
xiangfu	MOL003542	8-Isopentenyl-kaempferol	SCN5A
xiangfu	MOL003542	8-Isopentenyl-kaempferol	F7
xiangfu	MOL003542	8-Isopentenyl-kaempferol	KDR
xiangfu	MOL003542	8-Isopentenyl-kaempferol	RXRA
xiangfu	MOL003542	8-Isopentenyl-kaempferol	MAPK14
xiangfu	MOL003542	8-Isopentenyl-kaempferol	CCNA2
xiangfu	MOL003542	8-Isopentenyl-kaempferol	NCOA2
xiangfu	MOL003542	8-Isopentenyl-kaempferol	PDE3A
xiangfu	MOL003542	8-Isopentenyl-kaempferol	KCNH2
xiangfu	MOL003542	8-Isopentenyl-kaempferol	PYGM
xiangfu	MOL000358	beta-sitosterol	PGR
xiangfu	MOL000358	beta-sitosterol	NCOA2
xiangfu	MOL000358	beta-sitosterol	PTGS1
xiangfu	MOL000358	beta-sitosterol	PTGS2
xiangfu	MOL000358	beta-sitosterol	HSP90AA1
xiangfu	MOL000358	beta-sitosterol	KCNH2
xiangfu	MOL000358	beta-sitosterol	PRKACA
xiangfu	MOL000358	beta-sitosterol	DRD1
xiangfu	MOL000358	beta-sitosterol	CHRM3
xiangfu	MOL000358	beta-sitosterol	CHRM1
xiangfu	MOL000358	beta-sitosterol	SCN5A
xiangfu	MOL000358	beta-sitosterol	CHRM4
xiangfu	MOL000358	beta-sitosterol	PDE3A
xiangfu	MOL000358	beta-sitosterol	ADRA1A
xiangfu	MOL000358	beta-sitosterol	CHRM2
xiangfu	MOL000358	beta-sitosterol	ADRA1B
xiangfu	MOL000358	beta-sitosterol	ADRB2
xiangfu	MOL000358	beta-sitosterol	CHRNA2
xiangfu	MOL000358	beta-sitosterol	SLC6A4
xiangfu	MOL000358	beta-sitosterol	OPRM1
xiangfu	MOL000358	beta-sitosterol	CHRNA7
xiangfu	MOL000358	beta-sitosterol	BCL2
xiangfu	MOL000358	beta-sitosterol	BAX
xiangfu	MOL000358	beta-sitosterol	CASP9
xiangfu	MOL000358	beta-sitosterol	JUN
xiangfu	MOL000358	beta-sitosterol	CASP3
xiangfu	MOL000358	beta-sitosterol	CASP8
xiangfu	MOL000358	beta-sitosterol	PRKCA
xiangfu	MOL000358	beta-sitosterol	PON1
xiangfu	MOL000358	beta-sitosterol	MAP2
xiangfu	MOL000359	sitosterol	PGR
xiangfu	MOL000359	sitosterol	NCOA2
xiangfu	MOL000359	sitosterol	NR3C2
xiangfu	MOL004053	Isodalbergin	PTGS1
xiangfu	MOL004053	Isodalbergin	F2
xiangfu	MOL004053	Isodalbergin	SCN5A
xiangfu	MOL004053	Isodalbergin	PTGS2
xiangfu	MOL004053	Isodalbergin	RXRA
xiangfu	MOL004053	Isodalbergin	ADRB2
xiangfu	MOL004053	Isodalbergin	SLC6A4
xiangfu	MOL004053	Isodalbergin	DPP4
xiangfu	MOL004053	Isodalbergin	HSP90AA1
xiangfu	MOL004053	Isodalbergin	PRKACA
xiangfu	MOL004058	Khell	NOS2
xiangfu	MOL004058	Khell	PTGS2
xiangfu	MOL004058	Khell	RXRA
xiangfu	MOL004058	Khell	PDE3A
xiangfu	MOL004058	Khell	HSP90AA1
xiangfu	MOL004058	Khell	CHEK1
xiangfu	MOL010489	Resivit	PTGS1
xiangfu	MOL010489	Resivit	PTGS2
xiangfu	MOL010489	Resivit	HSP90AA1
xiangfu	MOL010489	Resivit	DPEP1
xiangfu	MOL004068	rosenonolactone	NR3C2
xiangfu	MOL004071	Hyndarin	DRD1
xiangfu	MOL004071	Hyndarin	CHRM3
xiangfu	MOL004071	Hyndarin	KCNH2
xiangfu	MOL004071	Hyndarin	CHRM1
xiangfu	MOL004071	Hyndarin	SCN5A
xiangfu	MOL004071	Hyndarin	F10
xiangfu	MOL004071	Hyndarin	CHRM5
xiangfu	MOL004071	Hyndarin	PTGS2
xiangfu	MOL004071	Hyndarin	CA2
xiangfu	MOL004071	Hyndarin	ADRA2C
xiangfu	MOL004071	Hyndarin	CHRM4
xiangfu	MOL004071	Hyndarin	OPRD1
xiangfu	MOL004071	Hyndarin	SLC6A2
xiangfu	MOL004071	Hyndarin	CHRM2
xiangfu	MOL004071	Hyndarin	ADRA1B
xiangfu	MOL004071	Hyndarin	SLC6A3
xiangfu	MOL004071	Hyndarin	ADRB2
xiangfu	MOL004071	Hyndarin	ADRA1D
xiangfu	MOL004071	Hyndarin	SLC6A4
xiangfu	MOL004071	Hyndarin	OPRM1
xiangfu	MOL004071	Hyndarin	HSP90AA1
xiangfu	MOL004071	Hyndarin	SERTAD1
xiangfu	MOL004071	Hyndarin	CALM1
xiangfu	MOL004071	Hyndarin	PTGS1
xiangfu	MOL004071	Hyndarin	ADRB1
xiangfu	MOL004071	Hyndarin	RXRA
xiangfu	MOL004071	Hyndarin	DRD3
xiangfu	MOL004071	Hyndarin	DRD2
xiangfu	MOL004071	Hyndarin	NCOA1
xiangfu	MOL004074	stigmasterol glucoside_qt	PGR
xiangfu	MOL004074	stigmasterol glucoside_qt	NCOA2
xiangfu	MOL004077	sugeonyl acetate	PTGS2
xiangfu	MOL004077	sugeonyl acetate	CHRM2
xiangfu	MOL004077	sugeonyl acetate	CHRNA7
xiangfu	MOL004077	sugeonyl acetate	GRIA2
xiangfu	MOL004077	sugeonyl acetate	NCOA2
xiangfu	MOL000422	kaempferol	NOS2
xiangfu	MOL000422	kaempferol	PTGS1
xiangfu	MOL000422	kaempferol	AR
xiangfu	MOL000422	kaempferol	PPARG
xiangfu	MOL000422	kaempferol	PTGS2
xiangfu	MOL000422	kaempferol	HSP90AA1
xiangfu	MOL000422	kaempferol	PRKACA
xiangfu	MOL000422	kaempferol	NCOA2
xiangfu	MOL000422	kaempferol	DPP4
xiangfu	MOL000422	kaempferol	PRSS1
xiangfu	MOL000422	kaempferol	PGR
xiangfu	MOL000422	kaempferol	F2
xiangfu	MOL000422	kaempferol	CHRM1
xiangfu	MOL000422	kaempferol	ACHE
xiangfu	MOL000422	kaempferol	SLC6A2
xiangfu	MOL000422	kaempferol	CHRM2
xiangfu	MOL000422	kaempferol	ADRA1B
xiangfu	MOL000422	kaempferol	TOP2A
xiangfu	MOL000422	kaempferol	F7
xiangfu	MOL000422	kaempferol	CALM1
xiangfu	MOL000422	kaempferol	RELA
xiangfu	MOL000422	kaempferol	IKBKB
xiangfu	MOL000422	kaempferol	AKT1
xiangfu	MOL000422	kaempferol	BCL2
xiangfu	MOL000422	kaempferol	BAX
xiangfu	MOL000422	kaempferol	TNFAIP6
xiangfu	MOL000422	kaempferol	JUN
xiangfu	MOL000422	kaempferol	AHSA1
xiangfu	MOL000422	kaempferol	CASP3
xiangfu	MOL000422	kaempferol	MAPK8
xiangfu	MOL000422	kaempferol	MMP1
xiangfu	MOL000422	kaempferol	STAT1
xiangfu	MOL000422	kaempferol	CDK1
xiangfu	MOL000422	kaempferol	PPARG
xiangfu	MOL000422	kaempferol	HMOX1
xiangfu	MOL000422	kaempferol	CYP3A4
xiangfu	MOL000422	kaempferol	SERTAD1
xiangfu	MOL000422	kaempferol	CYP1A1
xiangfu	MOL000422	kaempferol	ICAM1
xiangfu	MOL000422	kaempferol	SELE
xiangfu	MOL000422	kaempferol	VCAM1
xiangfu	MOL000422	kaempferol	NR1I2
xiangfu	MOL000422	kaempferol	CYP1B1
xiangfu	MOL000422	kaempferol	ALOX5
xiangfu	MOL000422	kaempferol	HAS2
xiangfu	MOL000422	kaempferol	AHR
xiangfu	MOL000422	kaempferol	PSMD3
xiangfu	MOL000422	kaempferol	SLC2A4
xiangfu	MOL000422	kaempferol	NR1I3
xiangfu	MOL000422	kaempferol	INSR
xiangfu	MOL000422	kaempferol	DIO1
xiangfu	MOL000422	kaempferol	PPP3CA
xiangfu	MOL000422	kaempferol	GSTM1
xiangfu	MOL000422	kaempferol	GSTM2
xiangfu	MOL000422	kaempferol	AKR1C3
xiangfu	MOL000422	kaempferol	SLPI
xiangfu	MOL000449	Stigmasterol	PGR
xiangfu	MOL000449	Stigmasterol	NR3C2
xiangfu	MOL000449	Stigmasterol	NCOA2
xiangfu	MOL000449	Stigmasterol	SERTAD1
xiangfu	MOL000449	Stigmasterol	IGHG1
xiangfu	MOL000449	Stigmasterol	RXRA
xiangfu	MOL000449	Stigmasterol	NCOA1
xiangfu	MOL000449	Stigmasterol	PTGS1
xiangfu	MOL000449	Stigmasterol	PTGS2
xiangfu	MOL000449	Stigmasterol	ADRA2A
xiangfu	MOL000449	Stigmasterol	SLC6A2
xiangfu	MOL000449	Stigmasterol	SLC6A3
xiangfu	MOL000449	Stigmasterol	ADRB2
xiangfu	MOL000449	Stigmasterol	AKR1B1
xiangfu	MOL000449	Stigmasterol	PLAU
xiangfu	MOL000449	Stigmasterol	LTA4H
xiangfu	MOL000449	Stigmasterol	MAOB
xiangfu	MOL000449	Stigmasterol	MAOA
xiangfu	MOL000449	Stigmasterol	PRKACA
xiangfu	MOL000449	Stigmasterol	CTRB1
xiangfu	MOL000449	Stigmasterol	CHRM3
xiangfu	MOL000449	Stigmasterol	CHRM1
xiangfu	MOL000449	Stigmasterol	ADRB1
xiangfu	MOL000449	Stigmasterol	SCN5A
xiangfu	MOL000449	Stigmasterol	ADRA1A
xiangfu	MOL000449	Stigmasterol	CHRM2
xiangfu	MOL000449	Stigmasterol	ADRA1B
xiangfu	MOL000449	Stigmasterol	CHRNA7
xiangfu	MOL000006	luteolin	PTGS1
xiangfu	MOL000006	luteolin	AR
xiangfu	MOL000006	luteolin	PTGS2
xiangfu	MOL000006	luteolin	HSP90AA1
xiangfu	MOL000006	luteolin	PRSS1
xiangfu	MOL000006	luteolin	NCOA2
xiangfu	MOL000006	luteolin	PRKACA
xiangfu	MOL000006	luteolin	DPP4
xiangfu	MOL000006	luteolin	RELA
xiangfu	MOL000006	luteolin	EGFR
xiangfu	MOL000006	luteolin	AKT1
xiangfu	MOL000006	luteolin	SERTAD1
xiangfu	MOL000006	luteolin	CCND1
xiangfu	MOL000006	luteolin	BCL2L1
xiangfu	MOL000006	luteolin	CDKN1A
xiangfu	MOL000006	luteolin	CASP9
xiangfu	MOL000006	luteolin	MMP2
xiangfu	MOL000006	luteolin	MMP9
xiangfu	MOL000006	luteolin	MAPK1
xiangfu	MOL000006	luteolin	IL10RB
xiangfu	MOL000006	luteolin	RB1
xiangfu	MOL000006	luteolin	CDK4
xiangfu	MOL000006	luteolin	TNFAIP6
xiangfu	MOL000006	luteolin	JUN
xiangfu	MOL000006	luteolin	IL6
xiangfu	MOL000006	luteolin	CASP3
xiangfu	MOL000006	luteolin	TP53
xiangfu	MOL000006	luteolin	NFKBIA
xiangfu	MOL000006	luteolin	TOP1
xiangfu	MOL000006	luteolin	MDM2
xiangfu	MOL000006	luteolin	APP
xiangfu	MOL000006	luteolin	MMP1
xiangfu	MOL000006	luteolin	PCNA
xiangfu	MOL000006	luteolin	ERBB2
xiangfu	MOL000006	luteolin	PPARG
xiangfu	MOL000006	luteolin	HMOX1
xiangfu	MOL000006	luteolin	CASP7
xiangfu	MOL000006	luteolin	ICAM1
xiangfu	MOL000006	luteolin	MCL1
xiangfu	MOL000006	luteolin	BIRC5
xiangfu	MOL000006	luteolin	IL2
xiangfu	MOL000006	luteolin	CCNB1
xiangfu	MOL000006	luteolin	TYR
xiangfu	MOL000006	luteolin	IFNG
xiangfu	MOL000006	luteolin	IL4R
xiangfu	MOL000006	luteolin	TOP2A
xiangfu	MOL000006	luteolin	XIAP
xiangfu	MOL000006	luteolin	SLC2A4
xiangfu	MOL000006	luteolin	INSR
xiangfu	MOL000006	luteolin	CD40LG
xiangfu	MOL000006	luteolin	PTGES
xiangfu	MOL000006	luteolin	NUF2
xiangfu	MOL000006	luteolin	ADCY2
xiangfu	MOL000006	luteolin	MET
xiangfu	MOL000098	quercetin	PTGS1
xiangfu	MOL000098	quercetin	AR
xiangfu	MOL000098	quercetin	PPARG
xiangfu	MOL000098	quercetin	PTGS2
xiangfu	MOL000098	quercetin	HSP90AA1
xiangfu	MOL000098	quercetin	NCOA2
xiangfu	MOL000098	quercetin	DPP4
xiangfu	MOL000098	quercetin	AKR1B1
xiangfu	MOL000098	quercetin	PRSS1
xiangfu	MOL000098	quercetin	TOP2A
xiangfu	MOL000098	quercetin	F2
xiangfu	MOL000098	quercetin	KCNH2
xiangfu	MOL000098	quercetin	SCN5A
xiangfu	MOL000098	quercetin	F10
xiangfu	MOL000098	quercetin	ADRB2
xiangfu	MOL000098	quercetin	MMP3
xiangfu	MOL000098	quercetin	PRKACA
xiangfu	MOL000098	quercetin	F7
xiangfu	MOL000098	quercetin	RXRA
xiangfu	MOL000098	quercetin	ACHE
xiangfu	MOL000098	quercetin	MAOB
xiangfu	MOL000098	quercetin	RELA
xiangfu	MOL000098	quercetin	EGFR
xiangfu	MOL000098	quercetin	AKT1
xiangfu	MOL000098	quercetin	SERTAD1
xiangfu	MOL000098	quercetin	CCND1
xiangfu	MOL000098	quercetin	BCL2
xiangfu	MOL000098	quercetin	BCL2L1
xiangfu	MOL000098	quercetin	FOS
xiangfu	MOL000098	quercetin	CDKN1A
xiangfu	MOL000098	quercetin	EIF6
xiangfu	MOL000098	quercetin	BAX
xiangfu	MOL000098	quercetin	CASP9
xiangfu	MOL000098	quercetin	PLAU
xiangfu	MOL000098	quercetin	MMP2
xiangfu	MOL000098	quercetin	MMP9
xiangfu	MOL000098	quercetin	MAPK1
xiangfu	MOL000098	quercetin	IL10RB
xiangfu	MOL000098	quercetin	RB1
xiangfu	MOL000098	quercetin	TNFAIP6
xiangfu	MOL000098	quercetin	JUN
xiangfu	MOL000098	quercetin	IL6
xiangfu	MOL000098	quercetin	AHSA1
xiangfu	MOL000098	quercetin	CASP3
xiangfu	MOL000098	quercetin	TP53
xiangfu	MOL000098	quercetin	ELK1
xiangfu	MOL000098	quercetin	NFKBIA
xiangfu	MOL000098	quercetin	ODC1
xiangfu	MOL000098	quercetin	CASP8
xiangfu	MOL000098	quercetin	TOP1
xiangfu	MOL000098	quercetin	RAF1
xiangfu	MOL000098	quercetin	SOD1
xiangfu	MOL000098	quercetin	PRKCA
xiangfu	MOL000098	quercetin	MMP1
xiangfu	MOL000098	quercetin	HIF1A
xiangfu	MOL000098	quercetin	STAT1
xiangfu	MOL000098	quercetin	RUNX1T1
xiangfu	MOL000098	quercetin	CDK1
xiangfu	MOL000098	quercetin	HSPA5
xiangfu	MOL000098	quercetin	ERBB2
xiangfu	MOL000098	quercetin	PPARG
xiangfu	MOL000098	quercetin	ACACA
xiangfu	MOL000098	quercetin	HMOX1
xiangfu	MOL000098	quercetin	CYP3A4
xiangfu	MOL000098	quercetin	CAV1
xiangfu	MOL000098	quercetin	MYC
xiangfu	MOL000098	quercetin	F3
xiangfu	MOL000098	quercetin	GJA1
xiangfu	MOL000098	quercetin	CYP1A1
xiangfu	MOL000098	quercetin	ICAM1
xiangfu	MOL000098	quercetin	IL1B
xiangfu	MOL000098	quercetin	CCL2
xiangfu	MOL000098	quercetin	SELE
xiangfu	MOL000098	quercetin	VCAM1
xiangfu	MOL000098	quercetin	CXCL8
xiangfu	MOL000098	quercetin	PRKCB
xiangfu	MOL000098	quercetin	BIRC5
xiangfu	MOL000098	quercetin	DUOX2
xiangfu	MOL000098	quercetin	NOS3
xiangfu	MOL000098	quercetin	HSPB1
xiangfu	MOL000098	quercetin	MGAM
xiangfu	MOL000098	quercetin	IL2
xiangfu	MOL000098	quercetin	NR1I2
xiangfu	MOL000098	quercetin	CYP1B1
xiangfu	MOL000098	quercetin	CCNB1
xiangfu	MOL000098	quercetin	PLAT
xiangfu	MOL000098	quercetin	THBD
xiangfu	MOL000098	quercetin	SERPINE1
xiangfu	MOL000098	quercetin	IFNG
xiangfu	MOL000098	quercetin	ALOX5
xiangfu	MOL000098	quercetin	IL1A
xiangfu	MOL000098	quercetin	MPO
xiangfu	MOL000098	quercetin	TOP2A
xiangfu	MOL000098	quercetin	NCF1
xiangfu	MOL000098	quercetin	ABCG2
xiangfu	MOL000098	quercetin	HAS2
xiangfu	MOL000098	quercetin	NFE2L2
xiangfu	MOL000098	quercetin	NQO1
xiangfu	MOL000098	quercetin	PARP1
xiangfu	MOL000098	quercetin	AHR
xiangfu	MOL000098	quercetin	PSMD3
xiangfu	MOL000098	quercetin	SLC2A4
xiangfu	MOL000098	quercetin	COL3A1
xiangfu	MOL000098	quercetin	CXCL11
xiangfu	MOL000098	quercetin	CXCL2
xiangfu	MOL000098	quercetin	DCAF5
xiangfu	MOL000098	quercetin	NR1I3
xiangfu	MOL000098	quercetin	CHEK2
xiangfu	MOL000098	quercetin	INSR
xiangfu	MOL000098	quercetin	CLDN4
xiangfu	MOL000098	quercetin	PPARA
xiangfu	MOL000098	quercetin	PPARD
xiangfu	MOL000098	quercetin	HSF1
xiangfu	MOL000098	quercetin	CRP
xiangfu	MOL000098	quercetin	CXCL10
xiangfu	MOL000098	quercetin	CHUK
xiangfu	MOL000098	quercetin	SPP1
xiangfu	MOL000098	quercetin	RUNX2
xiangfu	MOL000098	quercetin	RASSF1
xiangfu	MOL000098	quercetin	E2F1
xiangfu	MOL000098	quercetin	E2F2
xiangfu	MOL000098	quercetin	ACP3
xiangfu	MOL000098	quercetin	CTSD
xiangfu	MOL000098	quercetin	IGFBP3
xiangfu	MOL000098	quercetin	IGF2
xiangfu	MOL000098	quercetin	CD40LG
xiangfu	MOL000098	quercetin	IRF1
xiangfu	MOL000098	quercetin	ERBB3
xiangfu	MOL000098	quercetin	PON1
xiangfu	MOL000098	quercetin	DIO1
xiangfu	MOL000098	quercetin	PCOLCE
xiangfu	MOL000098	quercetin	NPEPPS
xiangfu	MOL000098	quercetin	HK2
xiangfu	MOL000098	quercetin	RASA1
xiangfu	MOL000098	quercetin	GSTM1
xiangfu	MOL000098	quercetin	GSTM2
zhishi	MOL013277	Isosinensetin	NOS2
zhishi	MOL013277	Isosinensetin	PTGS1
zhishi	MOL013277	Isosinensetin	F2
zhishi	MOL013277	Isosinensetin	KCNH2
zhishi	MOL013277	Isosinensetin	ESR1
zhishi	MOL013277	Isosinensetin	AR
zhishi	MOL013277	Isosinensetin	SCN5A
zhishi	MOL013277	Isosinensetin	PPARG
zhishi	MOL013277	Isosinensetin	F10
zhishi	MOL013277	Isosinensetin	PTGS2
zhishi	MOL013277	Isosinensetin	CA2
zhishi	MOL013277	Isosinensetin	F7
zhishi	MOL013277	Isosinensetin	ACHE
zhishi	MOL013277	Isosinensetin	PTPN1
zhishi	MOL013277	Isosinensetin	ADRB2
zhishi	MOL013277	Isosinensetin	TOP2A
zhishi	MOL013277	Isosinensetin	ESR2
zhishi	MOL013277	Isosinensetin	DPP4
zhishi	MOL013277	Isosinensetin	HSP90AA1
zhishi	MOL013277	Isosinensetin	CHEK1
zhishi	MOL013277	Isosinensetin	PRSS1
zhishi	MOL013277	Isosinensetin	NCOA2
zhishi	MOL013277	Isosinensetin	NCOA1
zhishi	MOL013277	Isosinensetin	CALM1
zhishi	MOL013279	5,7,4'-Trimethylapigenin	NOS2
zhishi	MOL013279	5,7,4'-Trimethylapigenin	PTGS1
zhishi	MOL013279	5,7,4'-Trimethylapigenin	SCN5A
zhishi	MOL013279	5,7,4'-Trimethylapigenin	F10
zhishi	MOL013279	5,7,4'-Trimethylapigenin	PTGS2
zhishi	MOL013279	5,7,4'-Trimethylapigenin	CA2
zhishi	MOL013279	5,7,4'-Trimethylapigenin	ADRA2C
zhishi	MOL013279	5,7,4'-Trimethylapigenin	ADRA1B
zhishi	MOL013279	5,7,4'-Trimethylapigenin	ADRB2
zhishi	MOL013279	5,7,4'-Trimethylapigenin	ESR2
zhishi	MOL013279	5,7,4'-Trimethylapigenin	DPP4
zhishi	MOL013279	5,7,4'-Trimethylapigenin	HSP90AA1
zhishi	MOL013279	5,7,4'-Trimethylapigenin	PRSS1
zhishi	MOL013279	5,7,4'-Trimethylapigenin	NCOA2
zhishi	MOL013279	5,7,4'-Trimethylapigenin	CALM1
zhishi	MOL013428	isosakuranetin-7-rutinoside	TOP2A
zhishi	MOL013430	Prangenin	F2
zhishi	MOL013430	Prangenin	PTGS2
zhishi	MOL013430	Prangenin	DPP4
zhishi	MOL013435	poncimarin	F2
zhishi	MOL013435	poncimarin	ESR1
zhishi	MOL013435	poncimarin	AR
zhishi	MOL013435	poncimarin	PTGS2
zhishi	MOL013436	isoponcimarin	F2
zhishi	MOL013436	isoponcimarin	PTGS2
zhishi	MOL013436	isoponcimarin	PDE3A
zhishi	MOL013436	isoponcimarin	ADRB2
zhishi	MOL013437	6-Methoxy aurapten	CHRM3
zhishi	MOL013437	6-Methoxy aurapten	CHRM1
zhishi	MOL013437	6-Methoxy aurapten	F10
zhishi	MOL013437	6-Methoxy aurapten	PTGS2
zhishi	MOL013437	6-Methoxy aurapten	CA2
zhishi	MOL013437	6-Methoxy aurapten	RXRA
zhishi	MOL013437	6-Methoxy aurapten	PDE3A
zhishi	MOL013437	6-Methoxy aurapten	ADRA1B
zhishi	MOL013437	6-Methoxy aurapten	ADRB2
zhishi	MOL013437	6-Methoxy aurapten	NCOA2
zhishi	MOL013437	6-Methoxy aurapten	CALM1
zhishi	MOL013440	citrusin B	F2
zhishi	MOL001798	neohesperidin_qt	PTGS1
zhishi	MOL001798	neohesperidin_qt	SCN5A
zhishi	MOL001798	neohesperidin_qt	PTGS2
zhishi	MOL001798	neohesperidin_qt	HSP90AA1
zhishi	MOL001798	neohesperidin_qt	PRKACA
zhishi	MOL001798	neohesperidin_qt	CALM1
zhishi	MOL001803	Sinensetin	NOS2
zhishi	MOL001803	Sinensetin	F2
zhishi	MOL001803	Sinensetin	KCNH2
zhishi	MOL001803	Sinensetin	AR
zhishi	MOL001803	Sinensetin	SCN5A
zhishi	MOL001803	Sinensetin	F10
zhishi	MOL001803	Sinensetin	PTGS2
zhishi	MOL001803	Sinensetin	F7
zhishi	MOL001803	Sinensetin	ACHE
zhishi	MOL001803	Sinensetin	ADRB2
zhishi	MOL001803	Sinensetin	TOP2A
zhishi	MOL001803	Sinensetin	ESR2
zhishi	MOL001803	Sinensetin	DPP4
zhishi	MOL001803	Sinensetin	HSP90AA1
zhishi	MOL001803	Sinensetin	CHEK1
zhishi	MOL001803	Sinensetin	PRSS1
zhishi	MOL001803	Sinensetin	NCOA2
zhishi	MOL001803	Sinensetin	NCOA1
zhishi	MOL001803	Sinensetin	CALM1
zhishi	MOL001803	Sinensetin	PTGS1
zhishi	MOL001803	Sinensetin	ADRA1B
zhishi	MOL001941	Ammidin	F2
zhishi	MOL001941	Ammidin	CHRM1
zhishi	MOL001941	Ammidin	PTGS2
zhishi	MOL001941	Ammidin	DPP4
zhishi	MOL001941	Ammidin	PRKACA
zhishi	MOL001941	Ammidin	MAOB
zhishi	MOL002914	Eriodyctiol (flavanone)	PTGS1
zhishi	MOL002914	Eriodyctiol (flavanone)	PTGS2
zhishi	MOL002914	Eriodyctiol (flavanone)	HSP90AA1
zhishi	MOL002914	Eriodyctiol (flavanone)	PRKACA
zhishi	MOL002914	Eriodyctiol (flavanone)	NCOA2
zhishi	MOL002914	Eriodyctiol (flavanone)	PYGM
zhishi	MOL002914	Eriodyctiol (flavanone)	CALM1
zhishi	MOL004328	naringenin	PTGS1
zhishi	MOL004328	naringenin	ESR1
zhishi	MOL004328	naringenin	PTGS2
zhishi	MOL004328	naringenin	HSP90AA1
zhishi	MOL004328	naringenin	DPEP1
zhishi	MOL004328	naringenin	PRKACA
zhishi	MOL004328	naringenin	RELA
zhishi	MOL004328	naringenin	AKT1
zhishi	MOL004328	naringenin	BCL2
zhishi	MOL004328	naringenin	MAPK3
zhishi	MOL004328	naringenin	MAPK1
zhishi	MOL004328	naringenin	CASP3
zhishi	MOL004328	naringenin	FASN
zhishi	MOL004328	naringenin	LDLR
zhishi	MOL004328	naringenin	BAD
zhishi	MOL004328	naringenin	SOD1
zhishi	MOL004328	naringenin	SERTAD1
zhishi	MOL004328	naringenin	PPARG
zhishi	MOL004328	naringenin	MTTP
zhishi	MOL004328	naringenin	APOB
zhishi	MOL004328	naringenin	PLB1
zhishi	MOL004328	naringenin	HMGCR
zhishi	MOL004328	naringenin	CYP19A1
zhishi	MOL004328	naringenin	UGT1A1
zhishi	MOL004328	naringenin	PPARA
zhishi	MOL004328	naringenin	SREBF1
zhishi	MOL004328	naringenin	GSR
zhishi	MOL004328	naringenin	ABCC1
zhishi	MOL004328	naringenin	ADIPOR2
zhishi	MOL004328	naringenin	SOAT2
zhishi	MOL004328	naringenin	AKR1C1
zhishi	MOL004328	naringenin	GOT1
zhishi	MOL004328	naringenin	ABAT
zhishi	MOL004328	naringenin	CES1
zhishi	MOL004328	naringenin	SOAT1
zhishi	MOL005100	5,7-dihydroxy-2-(3-hydroxy-4-methoxyphenyl)chroman-4-one	PTGS1
zhishi	MOL005100	5,7-dihydroxy-2-(3-hydroxy-4-methoxyphenyl)chroman-4-one	PTGS2
zhishi	MOL005100	5,7-dihydroxy-2-(3-hydroxy-4-methoxyphenyl)chroman-4-one	HSP90AA1
zhishi	MOL005100	5,7-dihydroxy-2-(3-hydroxy-4-methoxyphenyl)chroman-4-one	PRKACA
zhishi	MOL005100	5,7-dihydroxy-2-(3-hydroxy-4-methoxyphenyl)chroman-4-one	CALM1
zhishi	MOL005100	5,7-dihydroxy-2-(3-hydroxy-4-methoxyphenyl)chroman-4-one	SCN5A
zhishi	MOL005100	5,7-dihydroxy-2-(3-hydroxy-4-methoxyphenyl)chroman-4-one	NCOA2
zhishi	MOL005100	5,7-dihydroxy-2-(3-hydroxy-4-methoxyphenyl)chroman-4-one	NCOA1
zhishi	MOL005100	5,7-dihydroxy-2-(3-hydroxy-4-methoxyphenyl)chroman-4-one	TOP2A
zhishi	MOL005828	nobiletin	NOS2
zhishi	MOL005828	nobiletin	PTGS1
zhishi	MOL005828	nobiletin	F2
zhishi	MOL005828	nobiletin	KCNH2
zhishi	MOL005828	nobiletin	ESR1
zhishi	MOL005828	nobiletin	AR
zhishi	MOL005828	nobiletin	PPARG
zhishi	MOL005828	nobiletin	F10
zhishi	MOL005828	nobiletin	PTGS2
zhishi	MOL005828	nobiletin	F7
zhishi	MOL005828	nobiletin	PTPN1
zhishi	MOL005828	nobiletin	TOP2A
zhishi	MOL005828	nobiletin	ESR2
zhishi	MOL005828	nobiletin	DPP4
zhishi	MOL005828	nobiletin	HSP90AA1
zhishi	MOL005828	nobiletin	CHEK1
zhishi	MOL005828	nobiletin	PRSS1
zhishi	MOL005828	nobiletin	NCOA2
zhishi	MOL005828	nobiletin	CALM1
zhishi	MOL005828	nobiletin	GSK3B
zhishi	MOL005828	nobiletin	SCN5A
zhishi	MOL005828	nobiletin	BCL2
zhishi	MOL005828	nobiletin	BAX
zhishi	MOL005828	nobiletin	CASP9
zhishi	MOL005828	nobiletin	MMP9
zhishi	MOL005828	nobiletin	JUN
zhishi	MOL005828	nobiletin	TP53
zhishi	MOL005828	nobiletin	MAPK8
zhishi	MOL005828	nobiletin	TIMP1
zhishi	MOL005828	nobiletin	PPARG
zhishi	MOL005828	nobiletin	CREB1
zhishi	MOL005828	nobiletin	PLA2G4A
zhishi	MOL005828	nobiletin	CD163
zhishi	MOL005828	nobiletin	EPHB2
zhishi	MOL005849	didymin	PTGS1
zhishi	MOL005849	didymin	ESR1
zhishi	MOL005849	didymin	SCN5A
zhishi	MOL005849	didymin	PTGS2
zhishi	MOL005849	didymin	RXRA
zhishi	MOL005849	didymin	ADRB2
zhishi	MOL005849	didymin	HSP90AA1
zhishi	MOL005849	didymin	DPEP1
zhishi	MOL005849	didymin	PRKACA
zhishi	MOL005849	didymin	CALM1
zhishi	MOL005849	didymin	NCOA2
zhishi	MOL005849	didymin	NCOA1
zhishi	MOL000006	luteolin	PTGS1
zhishi	MOL000006	luteolin	AR
zhishi	MOL000006	luteolin	PTGS2
zhishi	MOL000006	luteolin	HSP90AA1
zhishi	MOL000006	luteolin	PRSS1
zhishi	MOL000006	luteolin	NCOA2
zhishi	MOL000006	luteolin	PRKACA
zhishi	MOL000006	luteolin	DPP4
zhishi	MOL000006	luteolin	RELA
zhishi	MOL000006	luteolin	EGFR
zhishi	MOL000006	luteolin	AKT1
zhishi	MOL000006	luteolin	SERTAD1
zhishi	MOL000006	luteolin	CCND1
zhishi	MOL000006	luteolin	BCL2L1
zhishi	MOL000006	luteolin	CDKN1A
zhishi	MOL000006	luteolin	CASP9
zhishi	MOL000006	luteolin	MMP2
zhishi	MOL000006	luteolin	MMP9
zhishi	MOL000006	luteolin	MAPK1
zhishi	MOL000006	luteolin	IL10RB
zhishi	MOL000006	luteolin	RB1
zhishi	MOL000006	luteolin	CDK4
zhishi	MOL000006	luteolin	TNFAIP6
zhishi	MOL000006	luteolin	JUN
zhishi	MOL000006	luteolin	IL6
zhishi	MOL000006	luteolin	CASP3
zhishi	MOL000006	luteolin	TP53
zhishi	MOL000006	luteolin	NFKBIA
zhishi	MOL000006	luteolin	TOP1
zhishi	MOL000006	luteolin	MDM2
zhishi	MOL000006	luteolin	APP
zhishi	MOL000006	luteolin	MMP1
zhishi	MOL000006	luteolin	PCNA
zhishi	MOL000006	luteolin	ERBB2
zhishi	MOL000006	luteolin	PPARG
zhishi	MOL000006	luteolin	HMOX1
zhishi	MOL000006	luteolin	CASP7
zhishi	MOL000006	luteolin	ICAM1
zhishi	MOL000006	luteolin	MCL1
zhishi	MOL000006	luteolin	BIRC5
zhishi	MOL000006	luteolin	IL2
zhishi	MOL000006	luteolin	CCNB1
zhishi	MOL000006	luteolin	TYR
zhishi	MOL000006	luteolin	IFNG
zhishi	MOL000006	luteolin	IL4R
zhishi	MOL000006	luteolin	TOP2A
zhishi	MOL000006	luteolin	XIAP
zhishi	MOL000006	luteolin	SLC2A4
zhishi	MOL000006	luteolin	INSR
zhishi	MOL000006	luteolin	CD40LG
zhishi	MOL000006	luteolin	PTGES
zhishi	MOL000006	luteolin	NUF2
zhishi	MOL000006	luteolin	ADCY2
zhishi	MOL000006	luteolin	MET
zhishi	MOL007879	Tetramethoxyluteolin	NOS2
zhishi	MOL007879	Tetramethoxyluteolin	PTGS1
zhishi	MOL007879	Tetramethoxyluteolin	F2
zhishi	MOL007879	Tetramethoxyluteolin	AR
zhishi	MOL007879	Tetramethoxyluteolin	SCN5A
zhishi	MOL007879	Tetramethoxyluteolin	PPARG
zhishi	MOL007879	Tetramethoxyluteolin	F10
zhishi	MOL007879	Tetramethoxyluteolin	PTGS2
zhishi	MOL007879	Tetramethoxyluteolin	F7
zhishi	MOL007879	Tetramethoxyluteolin	RXRA
zhishi	MOL007879	Tetramethoxyluteolin	ADRA1B
zhishi	MOL007879	Tetramethoxyluteolin	ADRB2
zhishi	MOL007879	Tetramethoxyluteolin	ESR2
zhishi	MOL007879	Tetramethoxyluteolin	DPP4
zhishi	MOL007879	Tetramethoxyluteolin	BACE1
zhishi	MOL007879	Tetramethoxyluteolin	MAPK14
zhishi	MOL007879	Tetramethoxyluteolin	GSK3B
zhishi	MOL007879	Tetramethoxyluteolin	HSP90AA1
zhishi	MOL007879	Tetramethoxyluteolin	CDK2
zhishi	MOL007879	Tetramethoxyluteolin	CHEK1
zhishi	MOL007879	Tetramethoxyluteolin	PRKACA
zhishi	MOL007879	Tetramethoxyluteolin	PRSS1
zhishi	MOL007879	Tetramethoxyluteolin	NCOA2
zhishi	MOL007879	Tetramethoxyluteolin	NCOA1
zhishi	MOL007879	Tetramethoxyluteolin	CALM1
zhishi	MOL007879	Tetramethoxyluteolin	KCNH2
zhishi	MOL007879	Tetramethoxyluteolin	ACHE
zhishi	MOL007879	Tetramethoxyluteolin	ADRA1D
zhishi	MOL007879	Tetramethoxyluteolin	TOP2A
zhishi	MOL007879	Tetramethoxyluteolin	NR1I2
zhishi	MOL009053	4-[(2S,3R)-5-[(E)-3-hydroxyprop-1-enyl]-7-methoxy-3-methylol-2,3-dihydrobenzofuran-2-yl]-2-methoxy-phenol	F2
zhishi	MOL009053	4-[(2S,3R)-5-[(E)-3-hydroxyprop-1-enyl]-7-methoxy-3-methylol-2,3-dihydrobenzofuran-2-yl]-2-methoxy-phenol	KCNH2
zhishi	MOL009053	4-[(2S,3R)-5-[(E)-3-hydroxyprop-1-enyl]-7-methoxy-3-methylol-2,3-dihydrobenzofuran-2-yl]-2-methoxy-phenol	ESR1
zhishi	MOL009053	4-[(2S,3R)-5-[(E)-3-hydroxyprop-1-enyl]-7-methoxy-3-methylol-2,3-dihydrobenzofuran-2-yl]-2-methoxy-phenol	F10
zhishi	MOL009053	4-[(2S,3R)-5-[(E)-3-hydroxyprop-1-enyl]-7-methoxy-3-methylol-2,3-dihydrobenzofuran-2-yl]-2-methoxy-phenol	PTGS2
zhishi	MOL009053	4-[(2S,3R)-5-[(E)-3-hydroxyprop-1-enyl]-7-methoxy-3-methylol-2,3-dihydrobenzofuran-2-yl]-2-methoxy-phenol	DPP4
zhishi	MOL009053	4-[(2S,3R)-5-[(E)-3-hydroxyprop-1-enyl]-7-methoxy-3-methylol-2,3-dihydrobenzofuran-2-yl]-2-methoxy-phenol	HSP90AA1
zhishi	MOL009053	4-[(2S,3R)-5-[(E)-3-hydroxyprop-1-enyl]-7-methoxy-3-methylol-2,3-dihydrobenzofuran-2-yl]-2-methoxy-phenol	PRSS1
zhishi	MOL009053	4-[(2S,3R)-5-[(E)-3-hydroxyprop-1-enyl]-7-methoxy-3-methylol-2,3-dihydrobenzofuran-2-yl]-2-methoxy-phenol	CALM1
zhishi	MOL009053	4-[(2S,3R)-5-[(E)-3-hydroxyprop-1-enyl]-7-methoxy-3-methylol-2,3-dihydrobenzofuran-2-yl]-2-methoxy-phenol	ACHE
