# Supplementary material for: Mechanism of Action of a Chinese Herbal Compound Containing Quercetin, Luteolin, and Kaempferol in the Treatment of Vitiligo Based on Network Pharmacology and Experimental Verification
Source: Evid Based Complement Alternat Med. 2022 Dec 16;2022:7197533. doi: 10.1155/2022/7197533 (PMC9788887; doi:10.1155/2022/7197533)
Supplement: Supplementary Materials — Supplementary Table 1. Compounds and related targets genes of Baishi Tablet. Supplementary Table 2A. Summarized vitiligo-related genes. Supplementary Table 2B. Vitiligo-related genes from five database respectively. Supplementary Table 2C. The interacting genes between vitiligo and Baishi tablet. Supplementary 3. Go enrichment analysis results. Supplementary 4. Protein-protein interaction network results. Supplementary 5. Description about compound-vitiligo-target network. [file 7197533.f1.zip › Suppl 2A vitiligo-related genes.txt]

CYP2A6
CYP1A2
CYP1A1
CYP2A13
TYR
FKBP1A
MTOR
CYP3A4
CYP3A5
ABCB1
ABCA5
ALB
ORM1
SLCO1B1
NLRP1
PTPN22
VAMAS6
AIRE
CAT
AIS3
DSTYK
FOXD3
KITLG
CTLA4
PMEL
TNF
HLA-B
TYRP1
DCT
MC1R
MLANA
IL17A
CCR6
FAS
MCHR1
MITF
PRDX5
CD4
FGF2
CD8A
POMC
PAH
PCBD1
MAOA
IL2
HLA-DRB1
NPY
PDCD1
HLA-A
TPO
DDC
HLA-DQB1
FBXO11
ICOSLG
PLCG2
CIITA
CD274
C4B
MIR518A1
HLA-C
HLA-DQA1
IL10
NBN
IL2RA
IFNG
ATM
AIS4
AIS2
FOXP3
IL6
ACE
IL4
AA1
AA2
ACP5
GSTM1
MYG1
DCLRE1C
GZMB
CXCL10
CXCR4
KANSL1
SLX4
FASLG
GSTT1
VDR
NFE2L2
MTHFR
TRAC
RAG1
ZNF627
TH
DDR1
CEP43
PSMB8
IL1RN
RAG2
FOXD3-AS1
IKZF4
COMT
SOD1
EDN1
SUOX
SMOC2
ICAM1
LRBA
GPX1
IL1B
POGZ
EMC1
MT-CO1
MT-CO2
MT-ND1
MT-ND5
MT-ND4
MT-ND6
MT-CO3
MT-TL1
MT-TS1
MT-TF
MT-TW
MT-TQ
MT-TS2
MT-TH
BTNL2
PTGS2
MBL2
ARMC9
RNASET2
LPP
TSLP
MTX2
TRA
CXCR3
TAP1
RAB5B
ZMIZ1
FANCA
TG
PTPRC
RERE
UBASH3A
C1QTNF6
HCG9
XBP1
CLEC11A
CD80
HLA-DRB4
CXCL9
MSH6
CXCR5
ATP8B1
KCNK12
HUNK
ASIP
NFKB2
GLI2
ABCD1
MT-ATP6
MT-TV
MT-TT
MT-TK
MT-TL2
MT-TN
MT-TE
MT-TI
MT-TA
MT-TP
EMC1-AS1
IFNA2
SIRT1
LTA
PSMB9
IFIH1
TP53
GCH1
GSTP1
TXNDC5
RPGRIP1L
HGF
TF
TGFB1
PDGFRA
NUDT6
FOXP1
SLC44A4
ESR1
APEX1
HLA-G
KLRK1
CCR5
G6PD
NR1H3
TSBP1
QDPR
AQP3
DKK1
HLA-DRA
RBM17
TSBP1-AS1
HMOX1
TGFBR2
FADS1
STAT3
ERBB3
CDK2
DDX6
DGKA
SLC29A3
ATXN2
CDH23
TREH
RPS26
PA2G4
UNC5B
PHLDB1
NOS2
CBS
UVRAG
CASP7
SLC1A2
CD44
SH2B3
HERC2
TICAM1
OCA2
BACH2
SLA
TOB2
CLNK
NRROS
FBXO45
VCAM1
KIF1B
CDH1
BCHE
BMP6
MPO
CXCL8
INS
AIS1
CCL5
CP
CCN3
TNC
CCR4
IL19
STAT4
HAVCR2
MIR196A2
ITGB1
HSPA4
IL33
CDK5RAP1
XDH
JAK1
PNMT
CRHR1
CRH
GAD2
CYP21A2
HLA-DQA2
TLR4
MSRA
AHR
ERCC6
H2AC18
PDE10A
ICA1
GCHFR
CORO2A
GAD1
GLRB
GPHN
GLRA1
ABAT
AMPH
CNTNAP2
GABARAP
DPP6
LGI1
TSPO
CSAD
DPYSL5
PNMA2
PTEN
PIK3CB
FANCD2
FANCF
FANCB
IL13
CD28
FOXO3
LAMB1
MIR2909
HNRNPA1P2
SIAE
TXN
RB1
CD59
CD46
CD14
FCGR3A
CCL20
MTRR
KLRD1
DEFB1
KIT
DGKE
IRF8
IL23R
SPTBN2
KIR3DL1
KIR3DL2
KIR2DL1
KIR3DL3
SLAMF8
CASP3
CREB1
IFNAR1
S100B
ARNT
IL22
EIF5B
IL26
IL15
MAPK1
TNFRSF1A
VEGFA
LEF1
IL10RB
USF1
SOD3
IL22RA1
IL20
IL20RA
MIR200C
LOC111365141
LIG4
XRCC6
XRCC5
NHEJ1
NOTCH1
TLR2
SIRT3
MC4R
CD27
SP1
CSF2
CCR8
CXCR6
CXCL16
LPO
CCL22
SOX10
EDNRB
EDNRA
MIF
NRG1
ERCC1
PON1
VDAC1
CALCA
SST
DNAH5
STRN3
MIR25
MRPS17P7
IDDM8
IL21
PCNA
BCL2
SOD2
PARP1
CDKN1A
BAX
CFLAR
MAGEA1
MIR155
IS1
SERPINE1
RIPK1
CALM1
TAT
FRS2
MSRB2
LGALS9
IFNE
MIR9-2
MIR421
F2RL1
MDH2
ACHE
FURIN
OGG1
PRSS1
MX1
MIR211
C4A
PDE6A
RPS27A
IL1RAPL1
IL7
DPP4
ITGAM
WASF5P
IGF1R
CHEK2
ATR
MDM2
RAD51
MYC
TERT
BRCA1
RAD50
BLM
LIG1
SMC1A
RPA1
AICDA
PML
KPNA2
WRN
RAD17
TERF1
MDC1
MRE11
TERF2
H2AX
OSGIN2
TH2LCRR
IGF1
PMS2
ACADS
FOXN1
MIR21
CALR
HMGB1
IL1R1
TRPS1
IL1A
FLG
ULBP3
TCHH
STX17
ITGA5
IL4R
OPRL1
TNFRSF10A
MIA
PNOC
PMCH
PVT1
PRO2268
ICOS
CCDC22
CD79A
PRTN3
BAD
TPH1
GAST
GDF15
CYP11A1
MAPT
BLNK
CD40LG
FANCC
NR0B1
REN
CD79B
FANCL
RHAG
SPP1
IGLL1
RAD51C
TNFSF13B
FANCG
FANCM
PALB2
FANCE
FANCI
GPR161
PREB
ASPN
AP4M1
SPN
VPREB1
HJV
KANSL3
VPREB3
AP5M1
SLX1B
IGLL5
FAAP24
SLX1A
FAAP100
FAAP20
SNAR-H
IGHV4-38-2
CD3G
CYP7B1
SLC33A1
KIF1C
SPG11
ZFYVE26
SPG21
ZFR
SPART
WASHC5
MAPK8
TRAF2
BRAF
PPP3CA
AHCY
PTPN1
PLCB3
ESRRA
FLI1
IL2RB
MSH2
NR1H2
ACO2
CYBA
ITGA7
KAT2A
PRMT1
PCYT1A
RXRB
RPS6KA2
TNFSF11
IRF3
DYNC1H1
GALNS
HIPK2
ITCH
FEN1
NUP62
PSMB7
PPP2R5C
THBS2
SMARCC2
TNFRSF11A
CDH15
CDK10
BCL2L11
BRD2
ABCG1
FADS2
HLA-DPB1
LGALS3
NEU1
PPIF
PARVA
TAP2
TMPRSS6
RHOH
SERPINB6
BEST1
ACSF3
CDH13
CHRNA9
CPT1C
IRF4
CNP
PNPT1
NTF4
RPL13A
PTGES3
RRAS
RNF168
AGPAT1
FAP
CARD8
CD37
CEP57
CBFA2T3
HLA-DMB
HLA-DPA1
HCRT
HLA-DMA
INCENP
KCNK4
MYL6
STK25
RAB5C
RAB4A
PLIN3
ANAPC1
ARID5B
CPVL
FARP2
HLA-DOA
HLA-DOB
GZMH
HLA-DRB5
NEK6
UBE2E2
RPS11
SESN3
BAZ2A
SAFB
SERPINB9
ATF6B
DHX58
BCL2L12
CYTH4
HLA-DQB2
DNAJC7
COL19A1
GJA10
NKIRAS2
POLR2G
PDS5A
MICAL2
RALY
TEF
TNFSF18
USP36
SNRNP70
AFMID
AKAP11
AHNAK
FADS3
HRC
KCNH4
LIN7B
FEM1A
POLR3H
KCNA7
PARP12
SLC37A1
SLC37A3
SYNGR2
SENP5
PTOV1
RHOU
ZC3H7B
BAG6
CPSF7
ADPRH
PPFIA3
PPARGC1B
KLHL11
MEI1
LUC7L2
TRMT112
SARNP
SLC6A16
VPS52
ALDH16A1
ENGASE
NARS1
PPP1R14B
PIH1D1
TTC26
RTKN2
DEF8
HUS1B
MAPK1IP1L
TPRG1
ZBTB21
ZC3H10
C2CD2
DUS3L
CNTD1
DNAJC14
GPSM3
HMGXB3
GPR31
GPR137
CHADL
N4BP2
UMODL1
TIGD6
CYB561A3
UBN2
SCAF1
WDR53
CGB7
TRIL
SLC45A1
TMEM109
ZBTB39
CBLN3
CCN4
DYNLT2B
CFAP36
DNAAF11
PRR12
CLHC1
HSPB9
PABPN1L
ZNF385C
ARRDC5
GAGE1
PPP4R3B
RETREG3
C19orf73
NBR2
MIR7-3HG
CATSPERZ
SPATA48
MIR378A
TMEM78
MIR4435-2HG
MIR7-3
PRORSD1P
CYP21A1P
HLA-DRB6
SNORD35A
SNORD35B
SNAI3-AS1
HCG23
TMEM198B
LOC344967
DPP9-AS1
HLA-DRB9
HLA-DQB1-AS1
LINC01063
MICD
LOC101929295
LINC02265
HLA-W
L3MBTL2-AS1
MSH2-OT1
LINC02341
RERE-AS1
LOC101928168
FTOP1
LINC02356
PHC1P1
LINC02571
RNU6-588P
STK19B
PPP4R3B-DT
ENSG00000261226
ENSG00000203327
ENSG00000249141
ENSG00000224228
ENSG00000236194
ENSG00000254680
ENSG00000231467
ENSG00000257449
ENSG00000267261
COX6CP2
CPVL-AS1
HSPD1P4
KRT18P39
LINC02814
LINC02815
RNU6-1149P
SLC25A38P1
RAB5C-AS1
SNRPEP4
ENSG00000271780
ENSG00000269807
ENSG00000205653
ENSG00000221083
ENSG00000229971
ENSG00000235237
ENSG00000257740
ENSG00000258199
ENSG00000258317
ENSG00000258657
HNRNPA1P49
LINC02498
LINC02624
RNU6-742P
SETP16
VDAC1P2
LOC100996598
ENSG00000285162
CHORDC1P1
LOC105369781
YWHAZP5
ENSG00000273890
lnc-FAM76B-1
lnc-GCA-5
lnc-C1QTNF6-1
lnc-MAP3K7-3
lnc-NEDD4L-2
ENSG00000205018
lnc-RNASET2-2
ENSG00000227370
HSALNG0020025
HSALNG0049408
HSALNG0049409
HSALNG0049410
ENSG00000285842
HSALNG0000636
HSALNG0113565
HSALNG0113566
L13304-028
lnc-HLA-DRB1-8
lnc-HLA-DRB5-1-002
lnc-RTKN2-5
lnc-TOB2-3
MN298114-192
lnc-KDM7A-1
lnc-KDM7A-2
lnc-BCL6-9
lnc-TBXAS1-1
MN298364
HSALNG0084560
lnc-BCL2L11-6-001
HSALNG0017872-001
HSALNG0047287
HSALNG0047530
HSALNG0049429
HSALNG0034003
HSALNG0055121
ENSG00000226233
piR-35530
HSALNG0084559
HSALNG0084561-001
HSALNG0113564
HSALNG0121781-001
HSALNG0121781-002
HSALNG0121782
HSALNG0135283
HSALNG0135284
lnc-ADGRD2-2
piR-39701-054
piR-52524
lnc-ERRFI1-4
MG828730-053
piR-37410
RF00017-3858
RF00017-3873
piR-31508-005
NONHSAG026224.2
piR-32940
piR-31432-064
HSALNG0079126
lnc-DACT2-4
RF00017-5006
RF00026-657
RF00017-5002
LOC105378119
LOC105369780
LOC105373724
LOC105373042
HSALNG0011289
HSALNG0011290
HSALNG0015030
HSALNG0015031
HSALNG0021699
HSALNG0049427
HSALNG0049428
HSALNG0082719
lnc-RRAS-5
lnc-SLC37A1-2
lnc-KCNH4-1
lnc-NEU1-2
HSALNG0133311
HSALNG0020027
HSALNG0031946
HSALNG0047288
HSALNG0061771
piR-36260-057
piR-49399-010
RF00017-029
RF00017-2536
piR-53177-042
lnc-NEU1-1
lnc-PDE6A-1
piR-41111-001
piR-52008-011
piR-59409-061
piR-30173
NONHSAG026256.2
piR-31534-168
RF00017-5251
RF00017-5014
LOC107984667
HSALNG0045783
HSALNG0000637
FJ868800
HSALNG0127018
HSALNG0127017
lnc-RRAS-4
HSALNG0086587
HSALNG0091478
HSALNG0103864
KR820244
HSALNG0096667
HSALNG0014763
HSALNG0068704
piR-40154-156
piR-42777
HSALNG0086584
HSALNG0126958
HSALNG0126959
piR-43107-159
piR-53431-565
piR-49423-221
piR-35674-157
piR-33614-192
NONHSAG009311.2
piR-31534-157
piR-32286-014
RF00017-5656
RF00017-7378
RF00998-075
RF00017-5507
piR-53338-079
MMP1
CDKN2A
GNA11
MCM2
MCM7
CORO1A
CHGA
CTSW
IL2RG
SHTN1
MIR3940
AKT1
IFI30
GDNF
TRPM2
RPL13
IL27RA
MAP2K2
AR
CA2
NR5A1
ADRB2
APOE
COL1A1
SMAD4
PRKDC
ARG1
ESR2
GLI3
CYP17A1
SMAD3
B2M
CYP2D6
GLDC
CXCR2
CYCS
GGT1
KRT18
F2
MC2R
TNFAIP3
SPTAN1
GAPDH
CYP11B2
CYP27B1
KRT8
LEP
IGF2
KDM6A
NDUFS7
TPMT
USP9X
AMPD1
DCN
AQP5
DLAT
COX4I1
ELANE
HSPG2
HSD3B2
GHR
NDUFS1
STAR
UQCRC2
TYMP
CXCL12
DGUOK
ARRB2
GRK6
LARS2
POLG
NDUFS8
TP53BP1
SAG
WARS2
COX10
CS
BCS1L
FMR1
GH1
IGFBP3
NDUFS2
PMPCA
LTF
NDUFA1
NDUFS4
NDUFV2
TFAM
SLC17A5
XRCC4
YARS2
AMH
ACAD9
DOCK8
APOH
COX6B1
ARRB1
CD34
COX15
ELAC2
GATAD2B
FTCD
IGFBP1
NDUFB8
RARS2
SELE
SSB
SURF1
TSFM
SMAD7
PEX3
SLC25A24
SEPSECS
ACKR3
DARS2
FCGR3B
COQ6
COX4I2
HAX1
PDSS1
NDUFB3
MTO1
TMC6
TRIT1
PEX19
TFB1M
CDK13
CXCL13
COQ9
COX5B
HOXD13
IARS2
G6PC3
GPT
HBG2
KAT8
MRPS22
PACS1
PDSS2
TRIM21
BMP15
ASGR1
ASGR2
ADI1
COQ2
COX6C
GTPBP3
IFT81
NDUFB6
MRPL44
PDE6H
NDUFAF2
PAPPA
TBCK
TBX19
TMC8
SHBG
SIL1
SLC25A17
CSF3
FASTKD2
CRHBP
IFNA1
FGF21
SHOX2
SERPINA7
TRMU
RPS4X
CCN2
COX7C
FBXL4
GRK3
GOLM1
MRRF
SHOX
TMEM70
TMEM126B
CCL18
JAKMIP1
MRPL18
PEX11A
EPRS1
GARS1
PNPLA1
OSGEPL1
SRY
SSNA1
AHDC1
COA3
GPR22
EFHC2
SPNS1
ARSL
ASXL3
ARRDC4
MTERF1
MT-ND2
TRMT61B
SLC25A44
C2CD5
EFCAB3
KANSL2
MT-ND3
OR4L1
TSPY1
RPS4Y1
SKOR1
TWNK
DENND4C
MT-CYB
KANSL1L
MT-ATP8
SPPL2C
YRDC
CGB3
LRRC37A3
MRM2
LRRC37A
RO60
LRRC37A2
MT-ND4L
ARHGAP11B
ZNRD2
XAGE3
PERM1
SRGAP2C
MIR9-1
MT-RNR2
IFNG-AS1
MAPT-AS1
MT-RNR1
LINC02210
LINC00426
AP4B1-AS1
LINC01436
CXCR2P1
MT-TG
MAPT-IT1
MT-TM
LINC02384
MT-TR
MIR663AHG
MT-TD
TRL-AAG2-3
NFKB1
NQO1
SGCB
TTF2
ASMT
MRPL28
IDH1
ITGB2
FZD4
RORA
ITGAL
MMP2
CCL2
CD55
HNF1A
HRH2
LINC00328
RELA
CASP1
TXNRD2
CDKN3
HPS1
MAGEA3
PTPN11
MAPK14
VIM
CD36
PIK3CG
SOS1
TXNRD1
ABCC4
TGM1
IL5
VIP
IL18
PRDX4
NTS
IL23A
IVL
PSIP1
LGI3
SOCS4
LOC107988030
NALP1
KIAA0926
DEFCAP
CARD7
VAMAS1
MSPC
AIADK
JRRP
JAK2
JAK3
MAOB
SYK
