# Supplementary material for: Mechanism of Action of a Chinese Herbal Compound Containing Quercetin, Luteolin, and Kaempferol in the Treatment of Vitiligo Based on Network Pharmacology and Experimental Verification
Source: Evid Based Complement Alternat Med. 2022 Dec 16;2022:7197533. doi: 10.1155/2022/7197533 (PMC9788887; doi:10.1155/2022/7197533)
Supplement: Supplementary Materials — Supplementary Table 1. Compounds and related targets genes of Baishi Tablet. Supplementary Table 2A. Summarized vitiligo-related genes. Supplementary Table 2B. Vitiligo-related genes from five database respectively. Supplementary Table 2C. The interacting genes between vitiligo and Baishi tablet. Supplementary 3. Go enrichment analysis results. Supplementary 4. Protein-protein interaction network results. Supplementary 5. Description about compound-vitiligo-target network. [file 7197533.f1.zip › Suppl 2B veen-disease.txt]

Drugbank	GeneCards	OMIM	Pharmgkb	TTD
CYP2A6	NLRP1	VAMAS6	AIS3	JAK2
CYP1A2	PTPN22	NLRP1		MAOA
CYP1A1	VAMAS6	NALP1		JAK3
CYP2A13	AIRE	KIAA0926		MAOB
TYR	CAT	DEFCAP		SYK
FKBP1A	AIS3	CARD7		JAK1
MTOR	DSTYK	VAMAS1		TYR
CYP3A4	FOXD3	MSPC		MC1R
FKBP1A	TYR	AIADK		FBXO11
CYP3A4	KITLG	JRRP
CYP3A5	CTLA4
ABCB1	PMEL
ABCA5	TNF
ALB	HLA-B
ORM1	TYRP1
SLCO1B1	DCT
	MC1R
	MLANA
	IL17A
	CCR6
	FAS
	MCHR1
	MITF
	PRDX5
	CD4
	FGF2
	CD8A
	POMC
	PAH
	PCBD1
	MAOA
	IL2
	HLA-DRB1
	NPY
	PDCD1
	HLA-A
	TPO
	DDC
	HLA-DQB1
	FBXO11
	ICOSLG
	PLCG2
	CIITA
	CD274
	C4B
	MIR518A1
	HLA-C
	HLA-DQA1
	IL10
	NBN
	IL2RA
	IFNG
	ATM
	AIS4
	AIS2
	FOXP3
	IL6
	ACE
	IL4
	AA1
	AA2
	ACP5
	GSTM1
	MYG1
	DCLRE1C
	GZMB
	CXCL10
	CXCR4
	KANSL1
	SLX4
	FASLG
	GSTT1
	VDR
	NFE2L2
	MTHFR
	TRAC
	RAG1
	ZNF627
	TH
	DDR1
	CEP43
	PSMB8
	IL1RN
	RAG2
	FOXD3-AS1
	IKZF4
	COMT
	SOD1
	EDN1
	SUOX
	SMOC2
	ICAM1
	LRBA
	GPX1
	IL1B
	POGZ
	EMC1
	MT-CO1
	MT-CO2
	MT-ND1
	MT-ND5
	MT-ND4
	MT-ND6
	MT-CO3
	MT-TL1
	MT-TS1
	MT-TF
	MT-TW
	MT-TQ
	MT-TS2
	MT-TH
	BTNL2
	PTGS2
	MBL2
	ARMC9
	RNASET2
	LPP
	TSLP
	MTX2
	TRA
	CXCR3
	TAP1
	RAB5B
	ZMIZ1
	FANCA
	TG
	PTPRC
	RERE
	UBASH3A
	C1QTNF6
	HCG9
	XBP1
	CLEC11A
	CD80
	HLA-DRB4
	CXCL9
	MSH6
	CXCR5
	ATP8B1
	KCNK12
	HUNK
	ASIP
	NFKB2
	GLI2
	ABCD1
	MT-ATP6
	MT-TV
	MT-TT
	MT-TK
	MT-TL2
	MT-TN
	MT-TE
	MT-TI
	MT-TA
	MT-TP
	EMC1-AS1
	IFNA2
	SIRT1
	LTA
	PSMB9
	IFIH1
	TP53
	GCH1
	GSTP1
	TXNDC5
	RPGRIP1L
	HGF
	TF
	TGFB1
	PDGFRA
	NUDT6
	FOXP1
	SLC44A4
	ESR1
	APEX1
	HLA-G
	KLRK1
	CCR5
	G6PD
	NR1H3
	TSBP1
	QDPR
	AQP3
	DKK1
	HLA-DRA
	RBM17
	TSBP1-AS1
	HMOX1
	TGFBR2
	FADS1
	STAT3
	ERBB3
	CDK2
	DDX6
	DGKA
	SLC29A3
	ATXN2
	CDH23
	TREH
	RPS26
	PA2G4
	UNC5B
	PHLDB1
	NOS2
	CBS
	UVRAG
	CASP7
	SLC1A2
	CD44
	SH2B3
	HERC2
	TICAM1
	OCA2
	BACH2
	SLA
	TOB2
	CLNK
	NRROS
	FBXO45
	VCAM1
	KIF1B
	CDH1
	BCHE
	BMP6
	MPO
	CXCL8
	INS
	AIS1
	CCL5
	CP
	CCN3
	TNC
	CCR4
	IL19
	STAT4
	HAVCR2
	MIR196A2
	ITGB1
	HSPA4
	IL33
	CDK5RAP1
	XDH
	JAK1
	PNMT
	CRHR1
	CRH
	GAD2
	CYP21A2
	HLA-DQA2
	TLR4
	MSRA
	AHR
	ERCC6
	H2AC18
	PDE10A
	ICA1
	GCHFR
	CORO2A
	GAD1
	GLRB
	GPHN
	GLRA1
	ABAT
	AMPH
	CNTNAP2
	GABARAP
	DPP6
	LGI1
	TSPO
	CSAD
	DPYSL5
	PNMA2
	PTEN
	PIK3CB
	FANCD2
	FANCF
	FANCB
	IL13
	CD28
	FOXO3
	LAMB1
	MIR2909
	HNRNPA1P2
	SIAE
	TXN
	RB1
	CD59
	CD46
	CD14
	FCGR3A
	CCL20
	MTRR
	KLRD1
	DEFB1
	KIT
	DGKE
	IRF8
	IL23R
	SPTBN2
	KIR3DL1
	KIR3DL2
	KIR2DL1
	KIR3DL3
	SLAMF8
	CASP3
	CREB1
	IFNAR1
	S100B
	ARNT
	IL22
	EIF5B
	IL26
	IL15
	MAPK1
	TNFRSF1A
	VEGFA
	LEF1
	IL10RB
	USF1
	SOD3
	IL22RA1
	IL20
	IL20RA
	MIR200C
	LOC111365141
	LIG4
	XRCC6
	XRCC5
	NHEJ1
	NOTCH1
	TLR2
	SIRT3
	MC4R
	CD27
	SP1
	CSF2
	CCR8
	CXCR6
	CXCL16
	LPO
	CCL22
	SOX10
	EDNRB
	EDNRA
	MIF
	NRG1
	ERCC1
	PON1
	VDAC1
	CALCA
	SST
	DNAH5
	STRN3
	MIR25
	MRPS17P7
	IDDM8
	IL21
	PCNA
	BCL2
	SOD2
	PARP1
	CDKN1A
	BAX
	CFLAR
	MAGEA1
	MIR155
	IS1
	SERPINE1
	RIPK1
	CALM1
	TAT
	FRS2
	MSRB2
	LGALS9
	IFNE
	MIR9-2
	MIR421
	F2RL1
	MDH2
	ACHE
	FURIN
	OGG1
	PRSS1
	MX1
	MIR211
	C4A
	PDE6A
	RPS27A
	IL1RAPL1
	IL7
	DPP4
	ITGAM
	WASF5P
	IGF1R
	CHEK2
	ATR
	MDM2
	RAD51
	MYC
	TERT
	BRCA1
	RAD50
	BLM
	LIG1
	SMC1A
	RPA1
	AICDA
	PML
	KPNA2
	WRN
	RAD17
	TERF1
	MDC1
	MRE11
	TERF2
	H2AX
	OSGIN2
	TH2LCRR
	IGF1
	PMS2
	ACADS
	FOXN1
	MIR21
	CALR
	HMGB1
	IL1R1
	TRPS1
	IL1A
	FLG
	ULBP3
	TCHH
	STX17
	ITGA5
	IL4R
	OPRL1
	TNFRSF10A
	MIA
	PNOC
	PMCH
	PVT1
	PRO2268
	ICOS
	CCDC22
	CD79A
	PRTN3
	BAD
	TPH1
	GAST
	GDF15
	CYP11A1
	MAPT
	BLNK
	CD40LG
	FANCC
	NR0B1
	REN
	CD79B
	FANCL
	RHAG
	SPP1
	IGLL1
	RAD51C
	TNFSF13B
	FANCG
	FANCM
	PALB2
	FANCE
	FANCI
	GPR161
	PREB
	ASPN
	AP4M1
	SPN
	VPREB1
	HJV
	KANSL3
	VPREB3
	AP5M1
	SLX1B
	IGLL5
	FAAP24
	SLX1A
	FAAP100
	FAAP20
	SNAR-H
	IGHV4-38-2
	CD3G
	CYP7B1
	SLC33A1
	KIF1C
	SPG11
	ZFYVE26
	SPG21
	ZFR
	SPART
	WASHC5
	MAPK8
	TRAF2
	BRAF
	PPP3CA
	AHCY
	PTPN1
	PLCB3
	ESRRA
	FLI1
	IL2RB
	MSH2
	NR1H2
	ACO2
	CYBA
	ITGA7
	KAT2A
	PRMT1
	PCYT1A
	RXRB
	RPS6KA2
	TNFSF11
	IRF3
	DYNC1H1
	GALNS
	HIPK2
	ITCH
	FEN1
	NUP62
	PSMB7
	PPP2R5C
	THBS2
	SMARCC2
	TNFRSF11A
	CDH15
	CDK10
	BCL2L11
	BRD2
	ABCG1
	FADS2
	HLA-DPB1
	LGALS3
	NEU1
	PPIF
	PARVA
	TAP2
	TMPRSS6
	RHOH
	SERPINB6
	BEST1
	ACSF3
	CDH13
	CHRNA9
	CPT1C
	IRF4
	CNP
	PNPT1
	NTF4
	RPL13A
	PTGES3
	RRAS
	RNF168
	AGPAT1
	FAP
	CARD8
	CD37
	CEP57
	CBFA2T3
	HLA-DMB
	HLA-DPA1
	HCRT
	HLA-DMA
	INCENP
	KCNK4
	MYL6
	STK25
	RAB5C
	RAB4A
	PLIN3
	ANAPC1
	ARID5B
	CPVL
	FARP2
	HLA-DOA
	HLA-DOB
	GZMH
	HLA-DRB5
	NEK6
	UBE2E2
	RPS11
	SESN3
	BAZ2A
	SAFB
	SERPINB9
	ATF6B
	DHX58
	BCL2L12
	CYTH4
	HLA-DQB2
	DNAJC7
	COL19A1
	GJA10
	NKIRAS2
	POLR2G
	PDS5A
	MICAL2
	RALY
	TEF
	TNFSF18
	USP36
	SNRNP70
	AFMID
	AKAP11
	AHNAK
	FADS3
	HRC
	KCNH4
	LIN7B
	FEM1A
	POLR3H
	KCNA7
	PARP12
	SLC37A1
	SLC37A3
	SYNGR2
	SENP5
	PTOV1
	RHOU
	ZC3H7B
	BAG6
	CPSF7
	ADPRH
	PPFIA3
	PPARGC1B
	KLHL11
	MEI1
	LUC7L2
	TRMT112
	SARNP
	SLC6A16
	VPS52
	ALDH16A1
	ENGASE
	NARS1
	PPP1R14B
	PIH1D1
	TTC26
	RTKN2
	DEF8
	HUS1B
	MAPK1IP1L
	TPRG1
	ZBTB21
	ZC3H10
	C2CD2
	DUS3L
	CNTD1
	DNAJC14
	GPSM3
	HMGXB3
	GPR31
	GPR137
	CHADL
	N4BP2
	UMODL1
	TIGD6
	CYB561A3
	UBN2
	SCAF1
	WDR53
	CGB7
	TRIL
	SLC45A1
	TMEM109
	ZBTB39
	CBLN3
	CCN4
	DYNLT2B
	CFAP36
	DNAAF11
	PRR12
	CLHC1
	HSPB9
	PABPN1L
	ZNF385C
	ARRDC5
	GAGE1
	PPP4R3B
	RETREG3
	C19orf73
	NBR2
	MIR7-3HG
	CATSPERZ
	SPATA48
	MIR378A
	TMEM78
	MIR4435-2HG
	MIR7-3
	PRORSD1P
	CYP21A1P
	HLA-DRB6
	SNORD35A
	SNORD35B
	SNAI3-AS1
	HCG23
	TMEM198B
	LOC344967
	DPP9-AS1
	HLA-DRB9
	HLA-DQB1-AS1
	LINC01063
	MICD
	LOC101929295
	LINC02265
	HLA-W
	L3MBTL2-AS1
	MSH2-OT1
	LINC02341
	RERE-AS1
	LOC101928168
	FTOP1
	LINC02356
	PHC1P1
	LINC02571
	RNU6-588P
	STK19B
	PPP4R3B-DT
	ENSG00000261226
	ENSG00000203327
	ENSG00000249141
	ENSG00000224228
	ENSG00000236194
	ENSG00000254680
	ENSG00000231467
	ENSG00000257449
	ENSG00000267261
	COX6CP2
	CPVL-AS1
	HSPD1P4
	KRT18P39
	LINC02814
	LINC02815
	RNU6-1149P
	SLC25A38P1
	RAB5C-AS1
	SNRPEP4
	ENSG00000271780
	ENSG00000269807
	ENSG00000205653
	ENSG00000221083
	ENSG00000229971
	ENSG00000235237
	ENSG00000257740
	ENSG00000258199
	ENSG00000258317
	ENSG00000258657
	HNRNPA1P49
	LINC02498
	LINC02624
	RNU6-742P
	SETP16
	VDAC1P2
	LOC100996598
	ENSG00000285162
	CHORDC1P1
	LOC105369781
	YWHAZP5
	ENSG00000273890
	lnc-FAM76B-1
	lnc-GCA-5
	lnc-C1QTNF6-1
	lnc-MAP3K7-3
	lnc-NEDD4L-2
	ENSG00000205018
	lnc-RNASET2-2
	ENSG00000227370
	HSALNG0020025
	HSALNG0049408
	HSALNG0049409
	HSALNG0049410
	ENSG00000285842
	HSALNG0000636
	HSALNG0113565
	HSALNG0113566
	L13304-028
	lnc-HLA-DRB1-8
	lnc-HLA-DRB5-1-002
	lnc-RTKN2-5
	lnc-TOB2-3
	MN298114-192
	lnc-KDM7A-1
	lnc-KDM7A-2
	lnc-BCL6-9
	lnc-TBXAS1-1
	MN298364
	HSALNG0084560
	lnc-BCL2L11-6-001
	HSALNG0017872-001
	HSALNG0047287
	HSALNG0047530
	HSALNG0049429
	HSALNG0034003
	HSALNG0055121
	ENSG00000226233
	piR-35530
	HSALNG0084559
	HSALNG0084561-001
	HSALNG0113564
	HSALNG0121781-001
	HSALNG0121781-002
	HSALNG0121782
	HSALNG0135283
	HSALNG0135284
	lnc-ADGRD2-2
	piR-39701-054
	piR-52524
	lnc-ERRFI1-4
	MG828730-053
	piR-37410
	RF00017-3858
	RF00017-3873
	piR-31508-005
	NONHSAG026224.2
	piR-32940
	piR-31432-064
	HSALNG0079126
	lnc-DACT2-4
	RF00017-5006
	RF00026-657
	RF00017-5002
	LOC105378119
	LOC105369780
	LOC105373724
	LOC105373042
	HSALNG0011289
	HSALNG0011290
	HSALNG0015030
	HSALNG0015031
	HSALNG0021699
	HSALNG0049427
	HSALNG0049428
	HSALNG0082719
	lnc-RRAS-5
	lnc-SLC37A1-2
	lnc-KCNH4-1
	lnc-NEU1-2
	HSALNG0133311
	HSALNG0020027
	HSALNG0031946
	HSALNG0047288
	HSALNG0061771
	piR-36260-057
	piR-49399-010
	RF00017-029
	RF00017-2536
	piR-53177-042
	lnc-NEU1-1
	lnc-PDE6A-1
	piR-41111-001
	piR-52008-011
	piR-59409-061
	piR-30173
	NONHSAG026256.2
	piR-31534-168
	RF00017-5251
	RF00017-5014
	LOC107984667
	HSALNG0045783
	HSALNG0000637
	FJ868800
	HSALNG0127018
	HSALNG0127017
	lnc-RRAS-4
	HSALNG0086587
	HSALNG0091478
	HSALNG0103864
	KR820244
	HSALNG0096667
	HSALNG0014763
	HSALNG0068704
	piR-40154-156
	piR-42777
	HSALNG0086584
	HSALNG0126958
	HSALNG0126959
	piR-43107-159
	piR-53431-565
	piR-49423-221
	piR-35674-157
	piR-33614-192
	NONHSAG009311.2
	piR-31534-157
	piR-32286-014
	RF00017-5656
	RF00017-7378
	RF00998-075
	RF00017-5507
	piR-53338-079
	MMP1
	CDKN2A
	GNA11
	MCM2
	MCM7
	CORO1A
	CHGA
	CTSW
	IL2RG
	SHTN1
	MIR3940
	AKT1
	IFI30
	GDNF
	TRPM2
	RPL13
	IL27RA
	MAP2K2
	AR
	CA2
	NR5A1
	ADRB2
	APOE
	COL1A1
	SMAD4
	PRKDC
	ALB
	ARG1
	ESR2
	GLI3
	CYP17A1
	SMAD3
	B2M
	CYP2D6
	GLDC
	CXCR2
	CYCS
	GGT1
	KRT18
	F2
	MC2R
	TNFAIP3
	SPTAN1
	GAPDH
	CYP11B2
	CYP27B1
	KRT8
	LEP
	IGF2
	KDM6A
	NDUFS7
	TPMT
	USP9X
	AMPD1
	DCN
	AQP5
	DLAT
	COX4I1
	ELANE
	HSPG2
	HSD3B2
	GHR
	NDUFS1
	STAR
	UQCRC2
	TYMP
	CXCL12
	CYP1A2
	DGUOK
	ARRB2
	GRK6
	LARS2
	POLG
	NDUFS8
	TP53BP1
	SAG
	WARS2
	COX10
	CS
	BCS1L
	FMR1
	GH1
	IGFBP3
	NDUFS2
	PMPCA
	LTF
	NDUFA1
	NDUFS4
	NDUFV2
	TFAM
	SLC17A5
	XRCC4
	YARS2
	AMH
	ACAD9
	DOCK8
	APOH
	COX6B1
	ARRB1
	CD34
	COX15
	ELAC2
	GATAD2B
	FTCD
	IGFBP1
	NDUFB8
	RARS2
	SELE
	SSB
	SURF1
	TSFM
	SMAD7
	PEX3
	SLC25A24
	SEPSECS
	ACKR3
	DARS2
	FCGR3B
	COQ6
	COX4I2
	HAX1
	PDSS1
	NDUFB3
	MTO1
	TMC6
	TRIT1
	PEX19
	TFB1M
	CDK13
	CXCL13
	COQ9
	COX5B
	HOXD13
	IARS2
	G6PC3
	GPT
	HBG2
	KAT8
	MRPS22
	PACS1
	PDSS2
	TRIM21
	BMP15
	ASGR1
	ASGR2
	ADI1
	COQ2
	COX6C
	GTPBP3
	IFT81
	NDUFB6
	MRPL44
	PDE6H
	NDUFAF2
	PAPPA
	TBCK
	TBX19
	TMC8
	SHBG
	SIL1
	SLC25A17
	CSF3
	FASTKD2
	CRHBP
	IFNA1
	FGF21
	SHOX2
	SERPINA7
	TRMU
	RPS4X
	CCN2
	COX7C
	FBXL4
	GRK3
	GOLM1
	MRRF
	SHOX
	TMEM70
	TMEM126B
	CCL18
	JAKMIP1
	MRPL18
	PEX11A
	EPRS1
	GARS1
	PNPLA1
	OSGEPL1
	SRY
	SSNA1
	AHDC1
	COA3
	GPR22
	EFHC2
	SPNS1
	ARSL
	ASXL3
	ARRDC4
	MTERF1
	MT-ND2
	TRMT61B
	SLC25A44
	C2CD5
	EFCAB3
	KANSL2
	MT-ND3
	OR4L1
	TSPY1
	RPS4Y1
	SKOR1
	TWNK
	DENND4C
	MT-CYB
	KANSL1L
	MT-ATP8
	SPPL2C
	YRDC
	CGB3
	LRRC37A3
	MRM2
	LRRC37A
	RO60
	LRRC37A2
	MT-ND4L
	ARHGAP11B
	ZNRD2
	XAGE3
	PERM1
	SRGAP2C
	MIR9-1
	MT-RNR2
	IFNG-AS1
	MAPT-AS1
	MT-RNR1
	LINC02210
	LINC00426
	AP4B1-AS1
	LINC01436
	CXCR2P1
	MT-TG
	MAPT-IT1
	MT-TM
	LINC02384
	MT-TR
	MIR663AHG
	MT-TD
	TRL-AAG2-3
	NFKB1
	NQO1
	SGCB
	TTF2
	ASMT
	MRPL28
	IDH1
	ITGB2
	FZD4
	RORA
	ITGAL
	MMP2
	CCL2
	CD55
	HNF1A
	HRH2
	LINC00328
	RELA
	CASP1
	TXNRD2
	CDKN3
	HPS1
	MAGEA3
	PTPN11
	MAPK14
	VIM
	CD36
	PIK3CG
	SOS1
	TXNRD1
	ABCC4
	TGM1
	IL5
	VIP
	IL18
	PRDX4
	NTS
	IL23A
	IVL
	PSIP1
	LGI3
	SOCS4
	LOC107988030
