# Supplementary material for: Mechanism of Action of a Chinese Herbal Compound Containing Quercetin, Luteolin, and Kaempferol in the Treatment of Vitiligo Based on Network Pharmacology and Experimental Verification
Source: Evid Based Complement Alternat Med. 2022 Dec 16;2022:7197533. doi: 10.1155/2022/7197533 (PMC9788887; doi:10.1155/2022/7197533)
Supplement: Supplementary Materials — Supplementary Table 1. Compounds and related targets genes of Baishi Tablet. Supplementary Table 2A. Summarized vitiligo-related genes. Supplementary Table 2B. Vitiligo-related genes from five database respectively. Supplementary Table 2C. The interacting genes between vitiligo and Baishi tablet. Supplementary 3. Go enrichment analysis results. Supplementary 4. Protein-protein interaction network results. Supplementary 5. Description about compound-vitiligo-target network. [file 7197533.f1.zip › Suppl 2C veen-Drug_Disease.txt]

IL6
CD14
PTGS2
ADRB2
BCL2
BAX
CASP3
PON1
NOS2
AR
DPP4
PRSS1
F2
ACHE
CALM1
RELA
AKT1
MAPK8
MMP1
HMOX1
CYP3A4
CYP1A1
ICAM1
SELE
VCAM1
AHR
PPP3CA
GSTM1
ESR1
PTPN1
MAOB
MAOA
ESR2
MAPK14
CDK2
CDKN1A
MMP2
MAPK1
IL10RB
RB1
TP53
SOD1
MYC
IL1B
CCL2
CXCL8
IL2
SERPINE1
IFNG
IL1A
MPO
NFE2L2
NQO1
PARP1
CHEK2
CXCL10
SPP1
IGFBP3
IGF2
CD40LG
ERBB3
CYCS
CA2
MDM2
PCNA
CASP7
TYR
IL4R
BAD
ABAT
CREB1
