# Supplementary material for: Mechanism of Action of a Chinese Herbal Compound Containing Quercetin, Luteolin, and Kaempferol in the Treatment of Vitiligo Based on Network Pharmacology and Experimental Verification
Source: Evid Based Complement Alternat Med. 2022 Dec 16;2022:7197533. doi: 10.1155/2022/7197533 (PMC9788887; doi:10.1155/2022/7197533)
Supplement: Supplementary Materials — Supplementary Table 1. Compounds and related targets genes of Baishi Tablet. Supplementary Table 2A. Summarized vitiligo-related genes. Supplementary Table 2B. Vitiligo-related genes from five database respectively. Supplementary Table 2C. The interacting genes between vitiligo and Baishi tablet. Supplementary 3. Go enrichment analysis results. Supplementary 4. Protein-protein interaction network results. Supplementary 5. Description about compound-vitiligo-target network. [file 7197533.f1.zip › Suppl 3 GOresult.txt]

ONTOLOGY	ID	Description	GeneRatio	BgRatio	pvalue	p.adjust	qvalue	geneID	Count
BP	GO:0010038	response to metal ion	25/71	364/18670	3.43213545184965e-25	1.13260469911039e-21	4.78692576179031e-22	CD14/PTGS2/BCL2/CASP3/CALM1/AKT1/MAPK8/HMOX1/CYP1A1/ICAM1/VCAM1/PPP3CA/MAOB/MAPK1/SOD1/IL1A/NFE2L2/NQO1/PARP1/CA2/MDM2/PCNA/BAD/ABAT/CREB1	25
BP	GO:0031667	response to nutrient levels	25/71	499/18670	8.304116478014e-22	1.37017921887231e-18	5.79102859650977e-19	PTGS2/ADRB2/BCL2/PON1/RELA/AKT1/MAPK8/HMOX1/CYP1A1/ICAM1/VCAM1/CDKN1A/MAPK1/TP53/SOD1/IL1B/MPO/NFE2L2/NQO1/CXCL10/SPP1/MDM2/PCNA/TYR/CREB1	25
BP	GO:0032496	response to lipopolysaccharide	21/71	330/18670	2.03836701664316e-20	2.24220371830748e-17	9.47661858614804e-18	IL6/CD14/PTGS2/CASP3/NOS2/RELA/AKT1/MAPK8/CYP1A1/ICAM1/SELE/VCAM1/MAOB/MAPK14/MAPK1/IL1B/CCL2/CXCL8/SERPINE1/MPO/CXCL10	21
BP	GO:0002237	response to molecule of bacterial origin	21/71	343/18670	4.54891313550643e-20	3.7528533367928e-17	1.58613418540685e-17	IL6/CD14/PTGS2/CASP3/NOS2/RELA/AKT1/MAPK8/CYP1A1/ICAM1/SELE/VCAM1/MAOB/MAPK14/MAPK1/IL1B/CCL2/CXCL8/SERPINE1/MPO/CXCL10	21
BP	GO:0007568	aging	20/71	321/18670	2.87660150348938e-19	1.89855699230299e-16	8.02420419394407e-17	PTGS2/BCL2/RELA/AKT1/CYP1A1/ICAM1/VCAM1/PPP3CA/MAPK14/CDKN1A/MAPK1/TP53/SOD1/SERPINE1/MPO/NFE2L2/NQO1/CHEK2/ABAT/CREB1	20
BP	GO:0046677	response to antibiotic	20/71	327/18670	4.14724509598162e-19	2.28098480278989e-16	9.6405258810099e-17	IL6/CD14/BCL2/CASP3/RELA/HMOX1/CYP1A1/ICAM1/VCAM1/AHR/MAOB/TP53/SOD1/IL2/NFE2L2/NQO1/MDM2/PCNA/BAD/ABAT	20
BP	GO:0035690	cellular response to drug	20/71	369/18670	4.45554255163526e-18	2.10047006005662e-15	8.87758478333341e-16	IL6/PTGS2/NOS2/RELA/HMOX1/ICAM1/AHR/PPP3CA/CDK2/MAPK1/TP53/SOD1/MYC/IL1B/NFE2L2/NQO1/CHEK2/MDM2/PCNA/BAD	20
BP	GO:0009314	response to radiation	21/71	448/18670	1.09467599160601e-17	4.19900692533322e-15	1.77469989667194e-15	PTGS2/BCL2/BAX/CASP3/CALM1/RELA/AKT1/MAPK8/ICAM1/VCAM1/MAPK14/CDKN1A/TP53/MYC/PARP1/CHEK2/CXCL10/MDM2/PCNA/TYR/CREB1	21
BP	GO:0006979	response to oxidative stress	21/71	451/18670	1.25356325319399e-17	4.19900692533322e-15	1.77469989667194e-15	IL6/PTGS2/BCL2/CASP3/RELA/AKT1/MAPK8/HMOX1/CDK2/MMP2/MAPK1/TP53/SOD1/MPO/NFE2L2/NQO1/PARP1/CYCS/MDM2/PCNA/BAD	21
BP	GO:0000302	response to reactive oxygen species	17/71	232/18670	1.27242634101007e-17	4.19900692533322e-15	1.77469989667194e-15	IL6/BCL2/CASP3/RELA/AKT1/MAPK8/HMOX1/CDK2/MMP2/MAPK1/SOD1/MPO/NFE2L2/NQO1/MDM2/PCNA/BAD	17
BP	GO:2001233	regulation of apoptotic signaling pathway	20/71	406/18670	2.86667764105141e-17	8.60003292315422e-15	3.63478265492164e-15	PTGS2/BCL2/BAX/AR/RELA/AKT1/MAPK8/HMOX1/ICAM1/PTPN1/RB1/TP53/SOD1/IL1B/SERPINE1/IL1A/NFE2L2/PARP1/MDM2/BAD	20
BP	GO:0034599	cellular response to oxidative stress	18/71	302/18670	4.97233454918327e-17	1.3673920010254e-14	5.77924848918231e-15	IL6/BCL2/RELA/AKT1/MAPK8/HMOX1/CDK2/MMP2/MAPK1/TP53/SOD1/MPO/NFE2L2/NQO1/PARP1/CYCS/MDM2/PCNA	18
BP	GO:0009411	response to UV	14/71	141/18670	1.69476124004922e-16	4.30208622474032e-14	1.81826610774511e-14	PTGS2/BCL2/BAX/CASP3/RELA/AKT1/MAPK8/CDKN1A/TP53/MYC/PARP1/MDM2/PCNA/TYR	14
BP	GO:0070482	response to oxygen levels	19/71	394/18670	3.00286216250947e-16	7.07817509734376e-14	2.99157320701132e-14	PTGS2/BCL2/CASP3/NOS2/DPP4/AKT1/HMOX1/CYP1A1/ICAM1/VCAM1/CDKN1A/MMP2/TP53/MYC/NFE2L2/MDM2/BAD/ABAT/CREB1	19
BP	GO:0072593	reactive oxygen species metabolic process	17/71	284/18670	3.83718511837394e-16	8.44180726042267e-14	3.56790896971612e-14	PTGS2/BCL2/NOS2/F2/AKT1/CYP1A1/ICAM1/MAOB/MAPK14/CDKN1A/TP53/SOD1/IL1B/IFNG/MPO/NFE2L2/NQO1	17
BP	GO:0001666	response to hypoxia	18/71	359/18670	1.03926500313404e-15	2.14348406896396e-13	9.05938242863558e-14	PTGS2/BCL2/CASP3/NOS2/DPP4/AKT1/HMOX1/CYP1A1/ICAM1/VCAM1/MMP2/TP53/MYC/NFE2L2/MDM2/BAD/ABAT/CREB1	18
BP	GO:0036293	response to decreased oxygen levels	18/71	370/18670	1.759019365235e-15	3.41456700310323e-13	1.44315830274698e-13	PTGS2/BCL2/CASP3/NOS2/DPP4/AKT1/HMOX1/CYP1A1/ICAM1/VCAM1/MMP2/TP53/MYC/NFE2L2/MDM2/BAD/ABAT/CREB1	18
BP	GO:0048545	response to steroid hormone	18/71	385/18670	3.51008960835574e-15	6.43516428198552e-13	2.71980627548032e-13	IL6/PTGS2/BCL2/CASP3/AR/RELA/ICAM1/ESR1/MAOB/ESR2/CDKN1A/RB1/PARP1/SPP1/CA2/MDM2/PCNA/BAD	18
BP	GO:0097191	extrinsic apoptotic signaling pathway	15/71	224/18670	4.84538017688395e-15	8.41566030721948e-13	3.5568580245824e-13	BCL2/BAX/CASP3/AR/RELA/AKT1/HMOX1/ICAM1/IL1B/IL2/SERPINE1/IFNG/IL1A/ERBB3/BAD	15
BP	GO:0042110	T cell activation	19/71	464/18670	5.94468801915576e-15	9.808735231607e-13	4.14563769756915e-13	IL6/BCL2/BAX/CASP3/DPP4/AKT1/ICAM1/VCAM1/PPP3CA/TP53/SOD1/IL1B/CCL2/IL2/IFNG/IGF2/CD40LG/IL4R/BAD	19
BP	GO:2001234	negative regulation of apoptotic signaling pathway	15/71	230/18670	7.1724701999715e-15	1.12710245999552e-12	4.7636706841916e-13	PTGS2/BCL2/BAX/AR/RELA/AKT1/HMOX1/ICAM1/PTPN1/RB1/IL1B/SERPINE1/IL1A/NFE2L2/MDM2	15
BP	GO:0010212	response to ionizing radiation	13/71	147/18670	1.02419311171704e-14	1.50685359005236e-12	6.36867944758973e-13	BCL2/BAX/CASP3/ICAM1/VCAM1/MAPK14/CDKN1A/TP53/MYC/PARP1/CHEK2/CXCL10/MDM2	13
BP	GO:0071216	cellular response to biotic stimulus	15/71	236/18670	1.05023129003649e-14	1.50685359005236e-12	6.36867944758973e-13	IL6/CD14/NOS2/RELA/AKT1/MAPK8/ICAM1/MAPK14/MAPK1/TP53/IL1B/CCL2/CXCL8/SERPINE1/CXCL10	15
BP	GO:0071222	cellular response to lipopolysaccharide	14/71	205/18670	3.29063157495632e-14	4.52461841556494e-12	1.91231878807768e-12	IL6/CD14/NOS2/RELA/AKT1/MAPK8/ICAM1/MAPK14/MAPK1/IL1B/CCL2/CXCL8/SERPINE1/CXCL10	14
BP	GO:0009416	response to light stimulus	16/71	314/18670	3.89154101412545e-14	5.1368341386456e-12	2.17107024998578e-12	PTGS2/BCL2/BAX/CASP3/CALM1/RELA/AKT1/MAPK8/CDKN1A/TP53/MYC/PARP1/MDM2/PCNA/TYR/CREB1	16
BP	GO:0071219	cellular response to molecule of bacterial origin	14/71	212/18670	5.24007407533265e-14	6.65086324946067e-12	2.81097091085658e-12	IL6/CD14/NOS2/RELA/AKT1/MAPK8/ICAM1/MAPK14/MAPK1/IL1B/CCL2/CXCL8/SERPINE1/CXCL10	14
BP	GO:0034614	cellular response to reactive oxygen species	13/71	168/18670	5.86426037261704e-14	7.16742934430971e-12	3.02929629384701e-12	IL6/RELA/AKT1/MAPK8/CDK2/MMP2/MAPK1/SOD1/MPO/NFE2L2/NQO1/MDM2/PCNA	13
BP	GO:1903039	positive regulation of leukocyte cell-cell adhesion	14/71	218/18670	7.70700544225821e-14	9.08325641409003e-12	3.83901586879403e-12	IL6/DPP4/RELA/AKT1/ICAM1/VCAM1/IL1B/CCL2/IL2/IFNG/IGF2/CD40LG/IL4R/BAD	14
BP	GO:0007584	response to nutrient	14/71	219/18670	8.2096809670176e-14	9.34205075557175e-12	3.94839465745855e-12	PTGS2/RELA/HMOX1/CYP1A1/VCAM1/SOD1/IL1B/NQO1/CXCL10/SPP1/MDM2/PCNA/TYR/CREB1	14
BP	GO:0071214	cellular response to abiotic stimulus	16/71	331/18670	8.8009535092441e-14	9.36875696145339e-12	3.95968196935431e-12	PTGS2/BAX/CASP3/CALM1/AKT1/MAPK8/MAPK14/CDKN1A/TP53/MYC/IL1B/PARP1/CHEK2/MDM2/PCNA/BAD	16
BP	GO:0104004	cellular response to environmental stimulus	16/71	331/18670	8.8009535092441e-14	9.36875696145339e-12	3.95968196935431e-12	PTGS2/BAX/CASP3/CALM1/AKT1/MAPK8/MAPK14/CDKN1A/TP53/MYC/IL1B/PARP1/CHEK2/MDM2/PCNA/BAD	16
BP	GO:0007159	leukocyte cell-cell adhesion	16/71	337/18670	1.1612298927953e-13	1.19751832694515e-11	5.0612816051111e-12	IL6/CASP3/DPP4/RELA/AKT1/ICAM1/SELE/VCAM1/IL1B/CCL2/IL2/IFNG/IGF2/CD40LG/IL4R/BAD	16
BP	GO:0022407	regulation of cell-cell adhesion	17/71	403/18670	1.22419752232525e-13	1.22419752232525e-11	5.17404056485155e-12	IL6/CASP3/DPP4/RELA/AKT1/ICAM1/VCAM1/MAPK14/IL1B/CCL2/IL2/IFNG/IGF2/CD40LG/IL4R/BAD/ABAT	17
BP	GO:2000379	positive regulation of reactive oxygen species metabolic process	11/71	102/18670	1.45263975624402e-13	1.40991505753096e-11	5.95897113629514e-12	PTGS2/F2/AKT1/ICAM1/MAPK14/CDKN1A/TP53/SOD1/IL1B/IFNG/NFE2L2	11
BP	GO:0035094	response to nicotine	9/71	49/18670	1.79044580246297e-13	1.6881346137508e-11	7.13485921282237e-12	BCL2/CASP3/RELA/HMOX1/VCAM1/MAPK1/BAD/ABAT/CREB1	9
BP	GO:0097193	intrinsic apoptotic signaling pathway	15/71	289/18670	2.05299015733932e-13	1.88190764422771e-11	7.95383613589064e-12	PTGS2/BCL2/BAX/CASP3/AKT1/HMOX1/PTPN1/CDKN1A/TP53/SOD1/NFE2L2/PARP1/CHEK2/MDM2/BAD	15
BP	GO:1903037	regulation of leukocyte cell-cell adhesion	15/71	304/18670	4.28066181251104e-13	3.81788756250985e-11	1.61362074013574e-11	IL6/CASP3/DPP4/RELA/AKT1/ICAM1/VCAM1/IL1B/CCL2/IL2/IFNG/IGF2/CD40LG/IL4R/BAD	15
BP	GO:0010332	response to gamma radiation	9/71	56/18670	6.46534196228379e-13	5.60527271036675e-11	2.36905465430174e-11	BCL2/BAX/CDKN1A/TP53/MYC/PARP1/CHEK2/CXCL10/MDM2	9
BP	GO:0022409	positive regulation of cell-cell adhesion	14/71	255/18670	6.62441320316071e-13	5.60527271036675e-11	2.36905465430174e-11	IL6/DPP4/RELA/AKT1/ICAM1/VCAM1/IL1B/CCL2/IL2/IFNG/IGF2/CD40LG/IL4R/BAD	14
BP	GO:1904951	positive regulation of establishment of protein localization	17/71	456/18670	8.98323812093609e-13	7.41117144977227e-11	3.1323132921685e-11	IL6/CD14/PTGS2/BCL2/ACHE/MAPK8/MAPK14/MAPK1/TP53/IL1B/IL2/IFNG/IL1A/MDM2/IL4R/BAD/ABAT	17
BP	GO:1903409	reactive oxygen species biosynthetic process	11/71	122/18670	1.07843637365739e-12	8.68009764163261e-11	3.6686218102594e-11	PTGS2/NOS2/AKT1/CYP1A1/ICAM1/MAOB/SOD1/IL1B/IFNG/MPO/NQO1	11
BP	GO:0071241	cellular response to inorganic substance	13/71	217/18670	1.58090634079309e-12	1.24214069633743e-10	5.24987694624271e-11	PTGS2/AKT1/MAPK8/HMOX1/CYP1A1/CDK2/MAPK1/SOD1/NFE2L2/NQO1/PARP1/BAD/CREB1	13
BP	GO:0071496	cellular response to external stimulus	15/71	339/18670	2.06073249590632e-12	1.58149238057927e-10	6.68413845061413e-11	PTGS2/BCL2/AKT1/MAPK8/HMOX1/ICAM1/VCAM1/CDKN1A/MAPK1/TP53/SOD1/IL1B/NFE2L2/MDM2/BAD	15
BP	GO:0000082	G1/S transition of mitotic cell cycle	14/71	279/18670	2.24801527143227e-12	1.6860114535742e-10	7.12588572882239e-11	BCL2/BAX/AKT1/CYP1A1/PPP3CA/CDK2/CDKN1A/RB1/TP53/MYC/CCL2/CHEK2/MDM2/PCNA	14
BP	GO:0051249	regulation of lymphocyte activation	17/71	485/18670	2.40672448201302e-12	1.76493128680955e-10	7.45943845302282e-11	IL6/BCL2/CASP3/DPP4/AKT1/VCAM1/AHR/CDKN1A/SOD1/IL1B/CCL2/IL2/IFNG/IGF2/CD40LG/IL4R/BAD	17
BP	GO:0070997	neuron death	15/71	348/18670	3.00011455015508e-12	2.15225609032864e-10	9.09645716008118e-11	BCL2/BAX/CASP3/AKT1/HMOX1/RB1/TP53/SOD1/CCL2/IFNG/NQO1/PARP1/ERBB3/BAD/CREB1	15
BP	GO:0097305	response to alcohol	13/71	233/18670	3.90351343301943e-12	2.74076475084343e-10	1.15837744652872e-10	CD14/AKT1/ICAM1/VCAM1/AHR/MAOB/CDKN1A/SOD1/IL2/NQO1/PARP1/BAD/ABAT	13
BP	GO:0009410	response to xenobiotic stimulus	14/71	292/18670	4.15841572250727e-12	2.85891080922375e-10	1.20831158603556e-10	RELA/CYP3A4/CYP1A1/ICAM1/AHR/PPP3CA/GSTM1/RB1/SOD1/NQO1/CHEK2/MDM2/PCNA/ABAT	14
BP	GO:2000045	regulation of G1/S transition of mitotic cell cycle	12/71	184/18670	4.51682272880524e-12	3.0419418377668e-10	1.28566919778022e-10	BCL2/BAX/AKT1/CYP1A1/CDK2/CDKN1A/RB1/TP53/CCL2/CHEK2/MDM2/PCNA	12
BP	GO:0044843	cell cycle G1/S phase transition	14/71	298/18670	5.46875013287464e-12	3.60937508769726e-10	1.52549345811766e-10	BCL2/BAX/AKT1/CYP1A1/PPP3CA/CDK2/CDKN1A/RB1/TP53/MYC/CCL2/CHEK2/MDM2/PCNA	14
BP	GO:0038034	signal transduction in absence of ligand	9/71	72/18670	6.92340545538755e-12	4.39369961591902e-10	1.8569862810503e-10	BCL2/BAX/CASP3/AKT1/IL1B/IL2/IL1A/ERBB3/BAD	9
BP	GO:0097192	extrinsic apoptotic signaling pathway in absence of ligand	9/71	72/18670	6.92340545538755e-12	4.39369961591902e-10	1.8569862810503e-10	BCL2/BAX/CASP3/AKT1/IL1B/IL2/IL1A/ERBB3/BAD	9
BP	GO:0042542	response to hydrogen peroxide	11/71	146/18670	7.83121162300707e-12	4.87603742564591e-10	2.06084516394923e-10	IL6/BCL2/CASP3/RELA/HMOX1/SOD1/NFE2L2/NQO1/MDM2/PCNA/BAD	11
BP	GO:2000377	regulation of reactive oxygen species metabolic process	12/71	195/18670	8.96502345471161e-12	5.47862544454598e-10	2.31552750048594e-10	PTGS2/BCL2/F2/AKT1/ICAM1/MAPK14/CDKN1A/TP53/SOD1/IL1B/IFNG/NFE2L2	12
BP	GO:0034612	response to tumor necrosis factor	14/71	312/18670	1.01299468932465e-11	6.07796813594792e-10	2.56883820737831e-10	CD14/PTGS2/CASP3/RELA/AKT1/ICAM1/SELE/VCAM1/MAPK14/MAPK1/CCL2/CXCL8/NFE2L2/CD40LG	14
BP	GO:1901214	regulation of neuron death	14/71	313/18670	1.05736856215672e-11	6.23092188413782e-10	2.63348373093544e-10	BCL2/BAX/CASP3/AKT1/HMOX1/TP53/SOD1/CCL2/IFNG/NQO1/PARP1/ERBB3/BAD/CREB1	14
BP	GO:0050863	regulation of T cell activation	14/71	314/18670	1.10352154761091e-11	6.38880895985264e-10	2.70021431317536e-10	IL6/CASP3/DPP4/AKT1/VCAM1/SOD1/IL1B/CCL2/IL2/IFNG/IGF2/CD40LG/IL4R/BAD	14
BP	GO:0042133	neurotransmitter metabolic process	11/71	153/18670	1.30737291733045e-11	7.43850108136289e-10	3.14386409339899e-10	PTGS2/NOS2/ACHE/AKT1/ICAM1/MAOB/MAOA/IL1B/IFNG/NQO1/ABAT	11
BP	GO:0050870	positive regulation of T cell activation	12/71	202/18670	1.35741553161134e-11	7.46578542386239e-10	3.15539575330707e-10	IL6/DPP4/AKT1/VCAM1/IL1B/CCL2/IL2/IFNG/IGF2/CD40LG/IL4R/BAD	12
BP	GO:1902806	regulation of cell cycle G1/S phase transition	12/71	202/18670	1.35741553161134e-11	7.46578542386239e-10	3.15539575330707e-10	BCL2/BAX/AKT1/CYP1A1/CDK2/CDKN1A/RB1/TP53/CCL2/CHEK2/MDM2/PCNA	12
BP	GO:0045785	positive regulation of cell adhesion	15/71	403/18670	2.41612960021072e-11	1.30708650503203e-09	5.52436880117205e-10	IL6/DPP4/RELA/AKT1/ICAM1/VCAM1/PPP3CA/IL1B/CCL2/IL2/IFNG/IGF2/CD40LG/IL4R/BAD	15
BP	GO:0051251	positive regulation of lymphocyte activation	14/71	334/18670	2.51698350731576e-11	1.3396847700229e-09	5.66214456229776e-10	IL6/BCL2/DPP4/AKT1/VCAM1/CDKN1A/IL1B/CCL2/IL2/IFNG/IGF2/CD40LG/IL4R/BAD	14
BP	GO:2001242	regulation of intrinsic apoptotic signaling pathway	11/71	165/18670	2.97542962485713e-11	1.55855837492516e-09	6.58720844266616e-10	PTGS2/BCL2/BAX/AKT1/PTPN1/TP53/SOD1/NFE2L2/PARP1/MDM2/BAD	11
BP	GO:0051222	positive regulation of protein transport	15/71	418/18670	4.04301155145196e-11	2.08467783121741e-09	8.8108393185425e-10	IL6/CD14/PTGS2/ACHE/MAPK14/MAPK1/TP53/IL1B/IL2/IFNG/IL1A/MDM2/IL4R/BAD/ABAT	15
BP	GO:2000134	negative regulation of G1/S transition of mitotic cell cycle	10/71	125/18670	4.1094844407525e-11	2.08635363915127e-09	8.81792207934747e-10	BCL2/BAX/CDK2/CDKN1A/RB1/TP53/CCL2/CHEK2/MDM2/PCNA	10
BP	GO:0051090	regulation of DNA-binding transcription factor activity	15/71	432/18670	6.41986061798195e-11	3.20993030899098e-09	1.35666910986062e-09	IL6/AR/RELA/AKT1/MAPK8/HMOX1/ICAM1/PPP3CA/ESR1/ESR2/MAPK14/MAPK1/RB1/IL1B/CD40LG	15
BP	GO:1902807	negative regulation of cell cycle G1/S phase transition	10/71	131/18670	6.56386382819611e-11	3.23294785567868e-09	1.36639741906675e-09	BCL2/BAX/CDK2/CDKN1A/RB1/TP53/CCL2/CHEK2/MDM2/PCNA	10
BP	GO:0048771	tissue remodeling	11/71	179/18670	7.18433206894941e-11	3.48651409228427e-09	1.47356656212972e-09	IL6/ADRB2/BAX/PPP3CA/MMP2/TP53/IL2/IL1A/SPP1/CA2/MDM2	11
BP	GO:0090068	positive regulation of cell cycle process	13/71	298/18670	8.53258932511923e-11	4.08080359027442e-09	1.72474154931853e-09	BAX/AKT1/CYP1A1/CDK2/CDKN1A/RB1/TP53/IL1B/IL1A/CHEK2/IGF2/MDM2/PCNA	13
BP	GO:0071248	cellular response to metal ion	11/71	190/18670	1.36506708539245e-10	6.43531625970726e-09	2.71987050848871e-09	PTGS2/AKT1/MAPK8/HMOX1/CYP1A1/MAPK1/SOD1/NFE2L2/NQO1/PARP1/CREB1	11
BP	GO:0002696	positive regulation of leukocyte activation	14/71	380/18670	1.38779064910456e-10	6.45029456626063e-09	2.72620105272579e-09	IL6/BCL2/DPP4/AKT1/VCAM1/CDKN1A/IL1B/CCL2/IL2/IFNG/IGF2/CD40LG/IL4R/BAD	14
BP	GO:0097237	cellular response to toxic substance	12/71	247/18670	1.41295084106063e-10	6.47602468819454e-09	2.73707582515399e-09	IL6/PTGS2/RELA/HMOX1/GSTM1/SOD1/MPO/NFE2L2/NQO1/MDM2/PCNA/BAD	12
BP	GO:0071478	cellular response to radiation	11/71	191/18670	1.44419686115566e-10	6.52856115316942e-09	2.75928023220079e-09	PTGS2/BAX/CALM1/MAPK14/CDKN1A/TP53/MYC/PARP1/CHEK2/MDM2/PCNA	11
BP	GO:1901654	response to ketone	11/71	193/18670	1.61494578186507e-10	7.20178524345235e-09	3.04381672968879e-09	AR/RELA/AKT1/ICAM1/AHR/MAOB/CDKN1A/PARP1/SPP1/PCNA/BAD	11
BP	GO:1901653	cellular response to peptide	14/71	385/18670	1.64778939147289e-10	7.25027332248074e-09	3.06431009642328e-09	ADRB2/RELA/AKT1/ICAM1/VCAM1/PTPN1/TP53/IL1B/NFE2L2/PARP1/IGF2/CA2/MDM2/CREB1	14
BP	GO:0001819	positive regulation of cytokine production	15/71	464/18670	1.74041428529603e-10	7.55706202825906e-09	3.1939735845114e-09	IL6/CD14/PTGS2/RELA/HMOX1/MAPK14/SOD1/IL1B/IL2/SERPINE1/IFNG/IL1A/CD40LG/IL4R/CREB1	15
BP	GO:2001237	negative regulation of extrinsic apoptotic signaling pathway	9/71	104/18670	2.03039670296886e-10	8.70170015558084e-09	3.67775205937627e-09	BCL2/AR/RELA/AKT1/HMOX1/ICAM1/IL1B/SERPINE1/IL1A	9
BP	GO:0050708	regulation of protein secretion	15/71	472/18670	2.20673124203798e-10	9.31899942819545e-09	3.9386520709279e-09	IL6/CD14/NOS2/DPP4/ACHE/PPP3CA/MAPK14/IL1B/IL2/IFNG/IL1A/CD40LG/IL4R/BAD/ABAT	15
BP	GO:0050867	positive regulation of cell activation	14/71	394/18670	2.23091198432558e-10	9.31899942819545e-09	3.9386520709279e-09	IL6/BCL2/DPP4/AKT1/VCAM1/CDKN1A/IL1B/CCL2/IL2/IFNG/IGF2/CD40LG/IL4R/BAD	14
BP	GO:1903829	positive regulation of cellular protein localization	13/71	324/18670	2.39745777522004e-10	9.82780433222531e-09	4.15369720580495e-09	PTGS2/BCL2/F2/AKT1/MAPK8/MAPK14/MAPK1/TP53/IL1B/IFNG/PARP1/MDM2/BAD	13
BP	GO:0042136	neurotransmitter biosynthetic process	9/71	106/18670	2.41227924518258e-10	9.82780433222531e-09	4.15369720580495e-09	PTGS2/NOS2/ACHE/AKT1/ICAM1/IL1B/IFNG/NQO1/ABAT	9
BP	GO:0034764	positive regulation of transmembrane transport	11/71	204/18670	2.92214665988175e-10	1.17598585092802e-08	4.97027512752673e-09	ADRB2/BAX/F2/CALM1/AKT1/MAPK14/CCL2/IFNG/NFE2L2/CXCL10/CA2	11
BP	GO:0031668	cellular response to extracellular stimulus	12/71	268/18670	3.61317164931045e-10	1.43653079942187e-08	6.07146191143215e-09	PTGS2/BCL2/MAPK8/HMOX1/ICAM1/VCAM1/CDKN1A/MAPK1/TP53/SOD1/NFE2L2/MDM2	12
BP	GO:1904019	epithelial cell apoptotic process	9/71	111/18670	3.65662385307385e-10	1.43653079942187e-08	6.07146191143215e-09	IL6/HMOX1/ICAM1/RB1/CCL2/SERPINE1/NFE2L2/CD40LG/BAD	9
BP	GO:0046651	lymphocyte proliferation	12/71	272/18670	4.28151578546114e-10	1.66223554023786e-08	7.02539741886813e-09	IL6/BCL2/BAX/CASP3/VCAM1/AHR/CDKN1A/TP53/IL1B/IL2/IGF2/CD40LG	12
BP	GO:0032943	mononuclear cell proliferation	12/71	274/18670	4.65595803142724e-10	1.78658854694301e-08	7.55097232759007e-09	IL6/BCL2/BAX/CASP3/VCAM1/AHR/CDKN1A/TP53/IL1B/IL2/IGF2/CD40LG	12
BP	GO:0002791	regulation of peptide secretion	15/71	500/18670	4.89542933156855e-10	1.85688698783635e-08	7.84808695018551e-09	IL6/CD14/NOS2/DPP4/ACHE/PPP3CA/MAPK14/IL1B/IL2/IFNG/IL1A/CD40LG/IL4R/BAD/ABAT	15
BP	GO:0031960	response to corticosteroid	10/71	162/18670	5.36117382925379e-10	2.01044018597017e-08	8.49707574612591e-09	IL6/PTGS2/BCL2/CASP3/ICAM1/MAOB/CDKN1A/PARP1/PCNA/BAD	10
BP	GO:0044706	multi-multicellular organism process	11/71	222/18670	7.18232227095236e-10	2.66310825776885e-08	1.12555612170454e-08	PTGS2/BCL2/AR/AKT1/CYP1A1/ESR1/MMP2/MAPK1/SOD1/IL1B/SPP1	11
BP	GO:0048732	gland development	14/71	434/18670	7.86145263700164e-10	2.88253263356727e-08	1.21829529169909e-08	BCL2/BAX/AR/RELA/AKT1/HMOX1/CYP1A1/ESR1/MAPK1/SOD1/IGF2/PCNA/TYR/CREB1	14
BP	GO:0034644	cellular response to UV	8/71	82/18670	8.30349805706640e-10	3.01115863607902e-08	1.27265875368571e-08	PTGS2/BAX/CDKN1A/TP53/MYC/PARP1/MDM2/PCNA	8
BP	GO:0045471	response to ethanol	9/71	125/18670	1.06096339335091e-09	3.80562956310653e-08	1.6084399269908e-08	CD14/ICAM1/VCAM1/MAOB/SOD1/IL2/NQO1/BAD/ABAT	9
BP	GO:0070661	leukocyte proliferation	12/71	298/18670	1.21206219453692e-09	4.30086585158262e-08	1.81775032004688e-08	IL6/BCL2/BAX/CASP3/VCAM1/AHR/CDKN1A/TP53/IL1B/IL2/IGF2/CD40LG	12
BP	GO:0071482	cellular response to light stimulus	9/71	129/18670	1.40496446737663e-09	4.92645768863862e-08	2.08215516345971e-08	PTGS2/BAX/CALM1/CDKN1A/TP53/MYC/PARP1/MDM2/PCNA	9
BP	GO:0007050	cell cycle arrest	11/71	237/18670	1.43315132760396e-09	4.92645768863862e-08	2.08215516345971e-08	BAX/CDK2/CDKN1A/RB1/TP53/MYC/CXCL8/IFNG/CHEK2/MDM2/PCNA	11
BP	GO:0031669	cellular response to nutrient levels	11/71	237/18670	1.43315132760396e-09	4.92645768863862e-08	2.08215516345971e-08	PTGS2/BCL2/MAPK8/HMOX1/ICAM1/CDKN1A/MAPK1/TP53/SOD1/NFE2L2/MDM2	11
BP	GO:1904035	regulation of epithelial cell apoptotic process	8/71	88/18670	1.47069860668718e-09	5.00340763099763e-08	2.11467786637061e-08	IL6/HMOX1/ICAM1/CCL2/SERPINE1/NFE2L2/CD40LG/BAD	8
BP	GO:0033002	muscle cell proliferation	11/71	239/18670	1.56576294184923e-09	5.21920980616409e-08	2.20588612222246e-08	IL6/PTGS2/AKT1/HMOX1/MAPK14/CDKN1A/MMP2/MAPK1/IFNG/IGFBP3/MDM2	11
BP	GO:0051402	neuron apoptotic process	11/71	239/18670	1.56576294184923e-09	5.21920980616409e-08	2.20588612222246e-08	BCL2/BAX/CASP3/HMOX1/RB1/TP53/SOD1/CCL2/NQO1/PARP1/ERBB3	11
BP	GO:0006977	DNA damage response, signal transduction by p53 class mediator resulting in cell cycle arrest	7/71	56/18670	1.69867133132317e-09	5.60561539336646e-08	2.36919948842442e-08	BAX/CDK2/CDKN1A/TP53/CHEK2/MDM2/PCNA	7
BP	GO:0072431	signal transduction involved in mitotic G1 DNA damage checkpoint	7/71	57/18670	1.93067499035201e-09	6.24630143937415e-08	2.63998386193644e-08	BAX/CDK2/CDKN1A/TP53/CHEK2/MDM2/PCNA	7
BP	GO:1902400	intracellular signal transduction involved in G1 DNA damage checkpoint	7/71	57/18670	1.93067499035201e-09	6.24630143937415e-08	2.63998386193644e-08	BAX/CDK2/CDKN1A/TP53/CHEK2/MDM2/PCNA	7
BP	GO:0045787	positive regulation of cell cycle	13/71	389/18670	2.2250200795911e-09	7.12870510936955e-08	3.01292959167932e-08	BAX/AKT1/CYP1A1/CDK2/CDKN1A/RB1/TP53/IL1B/IL1A/CHEK2/IGF2/MDM2/PCNA	13
BP	GO:0072413	signal transduction involved in mitotic cell cycle checkpoint	7/71	59/18670	2.47631328696326e-09	7.7092772141309e-08	3.25830695653061e-08	BAX/CDK2/CDKN1A/TP53/CHEK2/MDM2/PCNA	7
BP	GO:1902402	signal transduction involved in mitotic DNA damage checkpoint	7/71	59/18670	2.47631328696326e-09	7.7092772141309e-08	3.25830695653061e-08	BAX/CDK2/CDKN1A/TP53/CHEK2/MDM2/PCNA	7
BP	GO:1902403	signal transduction involved in mitotic DNA integrity checkpoint	7/71	59/18670	2.47631328696326e-09	7.7092772141309e-08	3.25830695653061e-08	BAX/CDK2/CDKN1A/TP53/CHEK2/MDM2/PCNA	7
BP	GO:0007565	female pregnancy	10/71	192/18670	2.80383464082011e-09	8.64734048103399e-08	3.65477707731102e-08	PTGS2/BCL2/AR/AKT1/ESR1/MMP2/MAPK1/SOD1/IL1B/SPP1	10
BP	GO:0018209	peptidyl-serine modification	12/71	322/18670	2.90936959322888e-09	8.88974042375491e-08	3.7572268138677e-08	IL6/PTGS2/BCL2/BAX/AKT1/MAPK8/MAPK14/CDK2/MAPK1/IFNG/PARP1/CHEK2	12
BP	GO:1903532	positive regulation of secretion by cell	13/71	399/18670	3.02097948342734e-09	9.14608467459655e-08	3.86557007778004e-08	IL6/CD14/ACHE/MAPK14/IL1B/IL2/IFNG/IL1A/SPP1/IL4R/BAD/ABAT/CREB1	13
BP	GO:0048871	multicellular organismal homeostasis	14/71	485/18670	3.28481941665186e-09	9.85445824995559e-08	4.16496241824279e-08	IL6/PTGS2/ADRB2/BCL2/BAX/ACHE/RB1/SOD1/IL1B/IL1A/SPP1/CA2/IL4R/ABAT	14
BP	GO:0046824	positive regulation of nucleocytoplasmic transport	7/71	62/18670	3.53778111682694e-09	1.05177276446206e-07	4.44529158823679e-08	PTGS2/MAPK14/MAPK1/TP53/IL1B/IFNG/MDM2	7
BP	GO:0031571	mitotic G1 DNA damage checkpoint	7/71	63/18670	3.96806208772882e-09	1.1588145919916e-07	4.89770122612081e-08	BAX/CDK2/CDKN1A/TP53/CHEK2/MDM2/PCNA	7
BP	GO:0044819	mitotic G1/S transition checkpoint	7/71	63/18670	3.96806208772882e-09	1.1588145919916e-07	4.89770122612081e-08	BAX/CDK2/CDKN1A/TP53/CHEK2/MDM2/PCNA	7
BP	GO:0034504	protein localization to nucleus	11/71	262/18670	4.10212161704815e-09	1.18111034846507e-07	4.99193368968492e-08	PTGS2/F2/AKT1/PPP3CA/MAPK14/CDKN1A/MAPK1/TP53/IFNG/PARP1/MDM2	11
BP	GO:0031649	heat generation	5/71	17/18670	4.11599060828738e-09	1.18111034846507e-07	4.99193368968492e-08	PTGS2/ADRB2/IL1B/IL1A/ABAT	5
BP	GO:0051384	response to glucocorticoid	9/71	146/18670	4.2082296775683e-09	1.19716878758409e-07	5.05980428564247e-08	IL6/PTGS2/BCL2/CASP3/ICAM1/MAOB/CDKN1A/PCNA/BAD	9
BP	GO:0044783	G1 DNA damage checkpoint	7/71	64/18670	4.44200002538132e-09	1.25287180203063e-07	5.29523169917251e-08	BAX/CDK2/CDKN1A/TP53/CHEK2/MDM2/PCNA	7
BP	GO:0050900	leukocyte migration	14/71	499/18670	4.72276049410232e-09	1.32077200258794e-07	5.58221021827437e-08	IL6/F2/AKT1/MMP1/HMOX1/ICAM1/SELE/VCAM1/MAPK14/IL1B/CCL2/CXCL8/SERPINE1/CXCL10	14
BP	GO:0050714	positive regulation of protein secretion	11/71	268/18670	5.19430737212125e-09	1.44043817882354e-07	6.08797635387939e-08	IL6/CD14/ACHE/MAPK14/IL1B/IL2/IFNG/IL1A/IL4R/BAD/ABAT	11
BP	GO:0071456	cellular response to hypoxia	10/71	207/18670	5.78881155725236e-09	1.5919231782444e-07	6.72822395908717e-08	PTGS2/BCL2/AKT1/HMOX1/ICAM1/TP53/MYC/NFE2L2/MDM2/BAD	10
BP	GO:0050670	regulation of lymphocyte proliferation	10/71	208/18670	6.06302158422347e-09	1.65355134115185e-07	6.9886938661123e-08	IL6/BCL2/CASP3/VCAM1/AHR/CDKN1A/IL1B/IL2/IGF2/CD40LG	10
BP	GO:0032944	regulation of mononuclear cell proliferation	10/71	209/18670	6.34868608125884e-09	1.71726754657001e-07	7.25798883319065e-08	IL6/BCL2/CASP3/VCAM1/AHR/CDKN1A/IL1B/IL2/IGF2/CD40LG	10
BP	GO:0043523	regulation of neuron apoptotic process	10/71	210/18670	6.64621909404236e-09	1.78313195206015e-07	7.53636311476776e-08	BCL2/BAX/CASP3/HMOX1/TP53/SOD1/CCL2/NQO1/PARP1/ERBB3	10
BP	GO:0051047	positive regulation of secretion	13/71	428/18670	7.00216604339227e-09	1.86347967283826e-07	7.87595077036906e-08	IL6/CD14/ACHE/MAPK14/IL1B/IL2/IFNG/IL1A/SPP1/IL4R/BAD/ABAT/CREB1	13
BP	GO:2001236	regulation of extrinsic apoptotic signaling pathway	9/71	155/18670	7.12259257524892e-09	1.88036443986571e-07	7.94731382080406e-08	BCL2/AR/RELA/AKT1/HMOX1/ICAM1/IL1B/SERPINE1/IL1A	9
BP	GO:0048608	reproductive structure development	13/71	431/18670	7.61043863730339e-09	1.99321011929375e-07	8.42425329526065e-08	PTGS2/BCL2/BAX/CASP3/AR/AKT1/ICAM1/ESR1/MAPK14/MAPK1/SOD1/SPP1/IGF2	13
BP	GO:0061458	reproductive system development	13/71	434/18670	8.2661867413107e-09	2.14790679104924e-07	9.07807495419534e-08	PTGS2/BCL2/BAX/CASP3/AR/AKT1/ICAM1/ESR1/MAPK14/MAPK1/SOD1/SPP1/IGF2	13
BP	GO:0036294	cellular response to decreased oxygen levels	10/71	217/18670	9.09877571068825e-09	2.34577811291181e-07	9.91437320449172e-08	PTGS2/BCL2/AKT1/HMOX1/ICAM1/TP53/MYC/NFE2L2/MDM2/BAD	10
BP	GO:0002793	positive regulation of peptide secretion	11/71	288/18670	1.09618356438474e-08	2.80419051354236e-07	1.18518418833927e-07	IL6/CD14/ACHE/MAPK14/IL1B/IL2/IFNG/IL1A/IL4R/BAD/ABAT	11
BP	GO:0070663	regulation of leukocyte proliferation	10/71	222/18670	1.13112441567641e-08	2.83494575056983e-07	1.19818281323924e-07	IL6/BCL2/CASP3/VCAM1/AHR/CDKN1A/IL1B/IL2/IGF2/CD40LG	10
BP	GO:0072401	signal transduction involved in DNA integrity checkpoint	7/71	73/18670	1.13397830022793e-08	2.83494575056983e-07	1.19818281323924e-07	BAX/CDK2/CDKN1A/TP53/CHEK2/MDM2/PCNA	7
BP	GO:0072422	signal transduction involved in DNA damage checkpoint	7/71	73/18670	1.13397830022793e-08	2.83494575056983e-07	1.19818281323924e-07	BAX/CDK2/CDKN1A/TP53/CHEK2/MDM2/PCNA	7
BP	GO:0042063	gliogenesis	11/71	290/18670	1.17746088616086e-08	2.92151949197808e-07	1.23477299102742e-07	IL6/F2/RELA/AKT1/MAPK1/SOD1/IL1B/CCL2/IFNG/ERBB3/CREB1	11
BP	GO:0072395	signal transduction involved in cell cycle checkpoint	7/71	74/18670	1.24869585147844e-08	3.0523676369473e-07	1.29007563603036e-07	BAX/CDK2/CDKN1A/TP53/CHEK2/MDM2/PCNA	7
BP	GO:1900182	positive regulation of protein localization to nucleus	7/71	74/18670	1.24869585147844e-08	3.0523676369473e-07	1.29007563603036e-07	PTGS2/F2/AKT1/MAPK14/MAPK1/IFNG/PARP1	7
BP	GO:0007569	cell aging	8/71	116/18670	1.33619638455445e-08	3.24224122722772e-07	1.3703252395779e-07	BCL2/ICAM1/MAPK14/CDKN1A/TP53/SOD1/SERPINE1/CHEK2	8
BP	GO:0048660	regulation of smooth muscle cell proliferation	9/71	169/18670	1.51718489423209e-08	3.65453295690942e-07	1.54457931990589e-07	IL6/PTGS2/AKT1/HMOX1/CDKN1A/MMP2/IFNG/IGFBP3/MDM2	9
BP	GO:0018105	peptidyl-serine phosphorylation	11/71	299/18670	1.61385076696154e-08	3.8592083557776e-07	1.63108487126166e-07	IL6/PTGS2/BCL2/BAX/AKT1/MAPK8/MAPK14/CDK2/MAPK1/IFNG/CHEK2	11
BP	GO:0006809	nitric oxide biosynthetic process	7/71	77/18670	1.65367914132533e-08	3.92600083911769e-07	1.65931454922837e-07	PTGS2/NOS2/AKT1/ICAM1/IL1B/IFNG/NQO1	7
BP	GO:0048659	smooth muscle cell proliferation	9/71	171/18670	1.68087107024594e-08	3.96205323700829e-07	1.67455200607208e-07	IL6/PTGS2/AKT1/HMOX1/CDKN1A/MMP2/IFNG/IGFBP3/MDM2	9
BP	GO:0071453	cellular response to oxygen levels	10/71	234/18670	1.86721824733934e-08	4.37008525973037e-07	1.84700573178397e-07	PTGS2/BCL2/AKT1/HMOX1/ICAM1/TP53/MYC/NFE2L2/MDM2/BAD	10
BP	GO:0009408	response to heat	9/71	176/18670	2.15947403684345e-08	5.01849600111506e-07	2.12105492870094e-07	CD14/PTGS2/AKT1/HMOX1/CDKN1A/MAPK1/SOD1/IL1A/CXCL10	9
BP	GO:0042113	B cell activation	11/71	310/18670	2.33961751138166e-08	5.39911733395768e-07	2.28192359409695e-07	IL6/BCL2/BAX/CASP3/VCAM1/AHR/CDKN1A/TP53/IL2/CD40LG/BAD	11
BP	GO:0046209	nitric oxide metabolic process	7/71	82/18670	2.57531434840124e-08	5.86106024118902e-07	2.47716262187415e-07	PTGS2/NOS2/AKT1/ICAM1/IL1B/IFNG/NQO1	7
BP	GO:0071158	positive regulation of cell cycle arrest	7/71	82/18670	2.57531434840124e-08	5.86106024118902e-07	2.47716262187415e-07	BAX/CDK2/CDKN1A/TP53/CHEK2/MDM2/PCNA	7
BP	GO:0071466	cellular response to xenobiotic stimulus	9/71	180/18670	2.62427070654967e-08	5.93157077507802e-07	2.50696372471399e-07	CYP3A4/CYP1A1/ICAM1/AHR/GSTM1/RB1/NQO1/CHEK2/PCNA	9
BP	GO:0009266	response to temperature stimulus	10/71	243/18670	2.67044408505817e-08	5.99487447666121e-07	2.53371887769573e-07	CD14/PTGS2/ADRB2/AKT1/HMOX1/CDKN1A/MAPK1/SOD1/IL1A/CXCL10	10
BP	GO:0048872	homeostasis of number of cells	10/71	246/18670	2.99902705704669e-08	6.68701978936086e-07	2.8262523830632e-07	IL6/BCL2/BAX/CASP3/AKT1/HMOX1/MAPK14/RB1/SOD1/IL2	10
BP	GO:0050727	regulation of inflammatory response	13/71	485/18670	3.07565118273813e-08	6.76693268488624e-07	2.86002737080519e-07	IL6/PTGS2/NOS2/F2/RELA/SELE/ESR1/MAPK14/RB1/SOD1/IL1B/IL2/SERPINE1	13
BP	GO:0001503	ossification	12/71	398/18670	3.07587849313011e-08	6.76693268488624e-07	2.86002737080519e-07	IL6/PTGS2/ADRB2/BCL2/ACHE/AKT1/MAPK14/MMP2/MAPK1/SPP1/IGFBP3/IGF2	12
BP	GO:0042098	T cell proliferation	9/71	184/18670	3.17430169443421e-08	6.93721562359794e-07	2.93199703389706e-07	IL6/BAX/CASP3/VCAM1/TP53/IL1B/IL2/IGF2/CD40LG	9
BP	GO:1901991	negative regulation of mitotic cell cycle phase transition	10/71	248/18670	3.23746174282837e-08	7.02869983640369e-07	2.97066261028226e-07	BCL2/BAX/CDK2/CDKN1A/RB1/TP53/CCL2/CHEK2/MDM2/PCNA	10
BP	GO:0050671	positive regulation of lymphocyte proliferation	8/71	130/18670	3.27516665851374e-08	7.06408494973552e-07	2.9856180409568e-07	IL6/BCL2/VCAM1/CDKN1A/IL1B/IL2/IGF2/CD40LG	8
BP	GO:2001057	reactive nitrogen species metabolic process	7/71	85/18670	3.31354408918048e-08	7.10045161967245e-07	3.00098832410399e-07	PTGS2/NOS2/AKT1/ICAM1/IL1B/IFNG/NQO1	7
BP	GO:0032946	positive regulation of mononuclear cell proliferation	8/71	131/18670	3.47770679149394e-08	7.40414994318064e-07	3.12934566976534e-07	IL6/BCL2/VCAM1/CDKN1A/IL1B/IL2/IGF2/CD40LG	8
BP	GO:0042770	signal transduction in response to DNA damage	8/71	133/18670	3.9153767519251e-08	8.28252774445695e-07	3.5005898760464e-07	BAX/MAPK14/CDK2/CDKN1A/TP53/CHEK2/MDM2/PCNA	8
BP	GO:0034103	regulation of tissue remodeling	7/71	88/18670	4.22353586695189e-08	8.87749577130014e-07	3.75205164177757e-07	IL6/BAX/PPP3CA/TP53/IL2/SPP1/CA2	7
BP	GO:0071902	positive regulation of protein serine/threonine kinase activity	11/71	334/18670	5.0119611797127e-08	1.04680201854759e-06	4.42428285351054e-07	ADRB2/CALM1/AKT1/PTPN1/MAPK14/MAPK1/SOD1/IL1B/IFNG/IGF2/CD40LG	11
BP	GO:0051091	positive regulation of DNA-binding transcription factor activity	10/71	261/18670	5.2386807948366e-08	1.08727337251326e-06	4.59533403055842e-07	IL6/AR/RELA/AKT1/ICAM1/PPP3CA/ESR1/ESR2/IL1B/CD40LG	10
BP	GO:0002685	regulation of leukocyte migration	9/71	196/18670	5.4739540055589e-08	1.12900301364652e-06	4.77170332721418e-07	IL6/AKT1/HMOX1/ICAM1/MAPK14/CCL2/CXCL8/SERPINE1/CXCL10	9
BP	GO:0070665	positive regulation of leukocyte proliferation	8/71	139/18670	5.52505770399472e-08	1.13246524367594e-06	4.78633635684407e-07	IL6/BCL2/VCAM1/CDKN1A/IL1B/IL2/IGF2/CD40LG	8
BP	GO:0033273	response to vitamin	7/71	93/18670	6.20879892101523e-08	1.26475533576236e-06	5.34545716071812e-07	PTGS2/RELA/CYP1A1/CXCL10/SPP1/MDM2/TYR	7
BP	GO:0072331	signal transduction by p53 class mediator	10/71	267/18670	6.48415896196808e-08	1.30473930332285e-06	5.51444841117311e-07	BCL2/BAX/AKT1/MAPK14/CDK2/CDKN1A/TP53/CHEK2/MDM2/PCNA	10
BP	GO:1901988	negative regulation of cell cycle phase transition	10/71	267/18670	6.48415896196808e-08	1.30473930332285e-06	5.51444841117311e-07	BCL2/BAX/CDK2/CDKN1A/RB1/TP53/CCL2/CHEK2/MDM2/PCNA	10
BP	GO:0001101	response to acid chemical	11/71	343/18670	6.56609305517887e-08	1.31321861103577e-06	5.55028599560575e-07	PTGS2/CASP3/PON1/RELA/AKT1/ICAM1/MMP2/NQO1/PCNA/BAD/CREB1	11
BP	GO:1901216	positive regulation of neuron death	7/71	94/18670	6.68823114548188e-08	1.32958811928254e-06	5.61947131754185e-07	BAX/CASP3/TP53/IFNG/NQO1/PARP1/BAD	7
BP	GO:0006606	protein import into nucleus	8/71	143/18670	6.88996949532936e-08	1.36149097811897e-06	5.75430796174686e-07	PTGS2/AKT1/PPP3CA/MAPK14/CDKN1A/MAPK1/TP53/IFNG	8
BP	GO:0001933	negative regulation of protein phosphorylation	12/71	429/18670	6.98744708197793e-08	1.36441274381818e-06	5.76665673224588e-07	BAX/CASP3/CALM1/AKT1/PTPN1/CDKN1A/RB1/MYC/IL1B/IL2/IFNG/IGFBP3	12
BP	GO:0051052	regulation of DNA metabolic process	12/71	429/18670	6.98744708197793e-08	1.36441274381818e-06	5.76665673224588e-07	IL6/BAX/AKT1/CDK2/CDKN1A/MAPK1/TP53/MYC/IL2/PARP1/CHEK2/PCNA	12
BP	GO:0042100	B cell proliferation	7/71	95/18670	7.19858751801098e-08	1.39737287114331e-06	5.90596189558176e-07	BCL2/BAX/CASP3/AHR/CDKN1A/IL2/CD40LG	7
BP	GO:0048638	regulation of developmental growth	11/71	347/18670	7.3848332745142e-08	1.42514326350274e-06	6.02333277238e-07	ADRB2/BCL2/AR/AKT1/MAPK14/CDKN1A/MAPK1/SOD1/SPP1/IGF2/CREB1	11
BP	GO:0000077	DNA damage checkpoint	8/71	145/18670	7.67493675726939e-08	1.47251693598773e-06	6.22355642801833e-07	BAX/MAPK14/CDK2/CDKN1A/TP53/CHEK2/MDM2/PCNA	8
BP	GO:0044773	mitotic DNA damage checkpoint	7/71	97/18670	8.3185554580558e-08	1.58024237092051e-06	6.67885531569275e-07	BAX/CDK2/CDKN1A/TP53/CHEK2/MDM2/PCNA	7
BP	GO:0043434	response to peptide hormone	12/71	436/18670	8.33218704667178e-08	1.58024237092051e-06	6.67885531569275e-07	PTGS2/RELA/AKT1/ICAM1/PTPN1/IL1B/NFE2L2/PARP1/IGF2/CA2/MDM2/CREB1	12
BP	GO:0031663	lipopolysaccharide-mediated signaling pathway	6/71	58/18670	8.44345575921818e-08	1.58467749876061e-06	6.69760027386859e-07	CD14/AKT1/MAPK14/MAPK1/IL1B/CCL2	6
BP	GO:0071236	cellular response to antibiotic	8/71	147/18670	8.53566887526123e-08	1.58467749876061e-06	6.69760027386859e-07	IL6/RELA/AHR/TP53/NFE2L2/NQO1/MDM2/PCNA	8
BP	GO:0060249	anatomical structure homeostasis	12/71	437/18670	8.54211413020056e-08	1.58467749876061e-06	6.69760027386859e-07	IL6/ADRB2/BCL2/BAX/MAPK1/RB1/SOD1/MYC/PARP1/SPP1/CA2/PCNA	12
BP	GO:0043270	positive regulation of ion transport	10/71	275/18670	8.54765438725417e-08	1.58467749876061e-06	6.69760027386859e-07	ADRB2/BAX/F2/CALM1/AKT1/IL1B/CCL2/IFNG/CXCL10/ABAT	10
BP	GO:0030098	lymphocyte differentiation	11/71	353/18670	8.78353266953269e-08	1.61931049214849e-06	6.84397576426393e-07	IL6/BCL2/BAX/VCAM1/TP53/SOD1/IL2/IFNG/CD40LG/IL4R/BAD	11
BP	GO:0001505	regulation of neurotransmitter levels	11/71	354/18670	9.03825147026452e-08	1.6570127695485e-06	7.00332350766111e-07	PTGS2/NOS2/ACHE/AKT1/ICAM1/MAOB/MAOA/IL1B/IFNG/NQO1/ABAT	11
BP	GO:0001844	protein insertion into mitochondrial membrane involved in apoptotic signaling pathway	5/71	30/18670	9.1223745179142e-08	1.66319535409485e-06	7.02945404840728e-07	BCL2/BAX/MAPK8/TP53/BAD	5
BP	GO:0010623	programmed cell death involved in cell development	4/71	12/18670	9.2873854776858e-08	1.68397648771226e-06	7.11728499591307e-07	BCL2/BAX/IL1B/IL1A	4
BP	GO:0009612	response to mechanical stimulus	9/71	210/18670	9.88950619332985e-08	1.78335357584637e-06	7.53729980222148e-07	PTGS2/RELA/AKT1/MAPK8/MAPK14/IL1B/MPO/CXCL10/BAD	9
BP	GO:1901990	regulation of mitotic cell cycle phase transition	12/71	444/18670	1.01492080283203e-07	1.82023839638354e-06	7.69319258439612e-07	BCL2/BAX/AKT1/CYP1A1/CDK2/CDKN1A/RB1/TP53/CCL2/CHEK2/MDM2/PCNA	12
BP	GO:0031331	positive regulation of cellular catabolic process	11/71	361/18670	1.10129542488563e-07	1.96447292006627e-06	8.30279623313494e-07	IL6/ADRB2/BAX/AKT1/HMOX1/PTPN1/IL1B/IFNG/NFE2L2/MDM2/BAD	11
BP	GO:0045807	positive regulation of endocytosis	8/71	153/18670	1.16344502927831e-07	2.06417666484862e-06	8.72419164569193e-07	CD14/SELE/PPP3CA/SOD1/IL1B/CCL2/SERPINE1/IFNG	8
BP	GO:0000075	cell cycle checkpoint	9/71	216/18670	1.25770761312439e-07	2.21948402316068e-06	9.38059435626125e-07	BAX/MAPK14/CDK2/CDKN1A/RB1/TP53/CHEK2/MDM2/PCNA	9
BP	GO:0090399	replicative senescence	4/71	13/18670	1.33766137785547e-07	2.33948782261871e-06	9.88778744806951e-07	CDKN1A/TP53/SERPINE1/CHEK2	4
BP	GO:0008630	intrinsic apoptotic signaling pathway in response to DNA damage	7/71	104/18670	1.34697783726532e-07	2.33948782261871e-06	9.88778744806951e-07	BCL2/BAX/HMOX1/CDKN1A/TP53/CHEK2/BAD	7
BP	GO:0046822	regulation of nucleocytoplasmic transport	7/71	104/18670	1.34697783726532e-07	2.33948782261871e-06	9.88778744806951e-07	PTGS2/MAPK14/MAPK1/TP53/IL1B/IFNG/MDM2	7
BP	GO:0010001	glial cell differentiation	9/71	218/18670	1.3604300108926e-07	2.35048117065214e-06	9.93425056176743e-07	IL6/F2/RELA/AKT1/MAPK1/SOD1/IL1B/IFNG/ERBB3	9
BP	GO:0046686	response to cadmium ion	6/71	63/18670	1.39638265255424e-07	2.40003268407761e-06	1.01436788083025e-06	AKT1/MAPK8/HMOX1/MAPK1/SOD1/PCNA	6
BP	GO:0031570	DNA integrity checkpoint	8/71	157/18670	1.41996267808729e-07	2.427915459942e-06	1.02615246712062e-06	BAX/MAPK14/CDK2/CDKN1A/TP53/CHEK2/MDM2/PCNA	8
BP	GO:0071356	cellular response to tumor necrosis factor	10/71	291/18670	1.44756825290086e-07	2.45987931461377e-06	1.03966191128014e-06	RELA/AKT1/ICAM1/VCAM1/MAPK14/MAPK1/CCL2/CXCL8/NFE2L2/CD40LG	10
BP	GO:0062012	regulation of small molecule metabolic process	12/71	459/18670	1.4535650495445e-07	2.45987931461377e-06	1.03966191128014e-06	PTGS2/NOS2/AKT1/TP53/SOD1/IL1B/IFNG/NQO1/PARP1/IGFBP3/IGF2/BAD	12
BP	GO:0010039	response to iron ion	5/71	33/18670	1.50590454862691e-07	2.52258122358822e-06	1.06616271810347e-06	BCL2/HMOX1/CYP1A1/MDM2/ABAT	5
BP	GO:0051204	protein insertion into mitochondrial membrane	5/71	33/18670	1.50590454862691e-07	2.52258122358822e-06	1.06616271810347e-06	BCL2/BAX/MAPK8/TP53/BAD	5
BP	GO:0051098	regulation of binding	11/71	373/18670	1.5302395106578e-07	2.53479741564164e-06	1.07132586147533e-06	ADRB2/BCL2/BAX/PON1/AKT1/MAPK8/HMOX1/PPP3CA/RB1/IFNG/PARP1	11
BP	GO:0044774	mitotic DNA integrity checkpoint	7/71	106/18670	1.53597659187132e-07	2.53479741564164e-06	1.07132586147533e-06	BAX/CDK2/CDKN1A/TP53/CHEK2/MDM2/PCNA	7
BP	GO:0060135	maternal process involved in female pregnancy	6/71	64/18670	1.53624085796463e-07	2.53479741564164e-06	1.07132586147533e-06	PTGS2/AR/AKT1/ESR1/MAPK1/SPP1	6
BP	GO:0030330	DNA damage response, signal transduction by p53 class mediator	7/71	107/18670	1.63856437407011e-07	2.69018031563749e-06	1.13699806003817e-06	BAX/CDK2/CDKN1A/TP53/CHEK2/MDM2/PCNA	7
BP	GO:0071156	regulation of cell cycle arrest	7/71	108/18670	1.74687177464807e-07	2.85380042393001e-06	1.20615169432449e-06	BAX/CDK2/CDKN1A/TP53/CHEK2/MDM2/PCNA	7
BP	GO:0042326	negative regulation of phosphorylation	12/71	468/18670	1.79171680062727e-07	2.91264307491133e-06	1.23102139529745e-06	BAX/CASP3/CALM1/AKT1/PTPN1/CDKN1A/RB1/MYC/IL1B/IL2/IFNG/IGFBP3	12
BP	GO:0051170	import into nucleus	8/71	163/18670	1.89532003003145e-07	3.0659588721097e-06	1.295819937973e-06	PTGS2/AKT1/PPP3CA/MAPK14/CDKN1A/MAPK1/TP53/IFNG	8
BP	GO:0051054	positive regulation of DNA metabolic process	9/71	228/18670	1.99139610478495e-07	3.20566202233676e-06	1.3548651290578e-06	IL6/BAX/AKT1/CDK2/MAPK1/MYC/IL2/PARP1/PCNA	9
BP	GO:0042108	positive regulation of cytokine biosynthetic process	6/71	67/18670	2.02659566748151e-07	3.24648820518882e-06	1.37212021431426e-06	IL6/RELA/HMOX1/IL1B/IFNG/IL1A	6
BP	GO:1901030	positive regulation of mitochondrial outer membrane permeabilization involved in apoptotic signaling pathway	5/71	35/18670	2.04769277613927e-07	3.2644377590626e-06	1.37970654888611e-06	BCL2/BAX/MAPK8/TP53/BAD	5
BP	GO:0007093	mitotic cell cycle checkpoint	8/71	165/18670	2.08147987078734e-07	3.30234787192222e-06	1.39572916436904e-06	BAX/CDK2/CDKN1A/RB1/TP53/CHEK2/MDM2/PCNA	8
BP	GO:1901987	regulation of cell cycle phase transition	12/71	480/18670	2.35136509445182e-07	3.71268172808181e-06	1.56915575429295e-06	BCL2/BAX/AKT1/CYP1A1/CDK2/CDKN1A/RB1/TP53/CCL2/CHEK2/MDM2/PCNA	12
BP	GO:0043200	response to amino acid	7/71	113/18670	2.38346904113098e-07	3.74545135034869e-06	1.58300575413461e-06	CASP3/RELA/ICAM1/MMP2/PCNA/BAD/CREB1	7
BP	GO:0034349	glial cell apoptotic process	4/71	15/18670	2.53908260618853e-07	3.95234556623686e-06	1.67044908301877e-06	CASP3/RB1/TP53/CCL2	4
BP	GO:0045073	regulation of chemokine biosynthetic process	4/71	15/18670	2.53908260618853e-07	3.95234556623686e-06	1.67044908301877e-06	IL6/HMOX1/IL1B/IFNG	4
BP	GO:0010959	regulation of metal ion transport	11/71	394/18670	2.64669859038908e-07	4.10051894285632e-06	1.73307419434916e-06	PTGS2/ADRB2/BCL2/BAX/F2/CALM1/AKT1/ICAM1/CCL2/IFNG/CXCL10	11
BP	GO:0043029	T cell homeostasis	5/71	37/18670	2.73336231815146e-07	4.1953933255348e-06	1.77317261765027e-06	BCL2/BAX/CASP3/AKT1/IL2	5
BP	GO:0071276	cellular response to cadmium ion	5/71	37/18670	2.73336231815146e-07	4.1953933255348e-06	1.77317261765027e-06	AKT1/MAPK8/HMOX1/MAPK1/SOD1	5
BP	GO:0046879	hormone secretion	10/71	312/18670	2.75773140341203e-07	4.21320075521283e-06	1.78069888378214e-06	IL6/NOS2/DPP4/PPP3CA/IL1B/IFNG/SPP1/BAD/ABAT/CREB1	10
BP	GO:1900180	regulation of protein localization to nucleus	7/71	116/18670	2.85181716485829e-07	4.33686481291813e-06	1.83296519206269e-06	PTGS2/F2/AKT1/MAPK14/MAPK1/IFNG/PARP1	7
BP	GO:0001659	temperature homeostasis	8/71	173/18670	2.99175482081427e-07	4.52880316912251e-06	1.91408746382371e-06	PTGS2/ADRB2/ACHE/RB1/IL1B/IL1A/IL4R/ABAT	8
BP	GO:0051881	regulation of mitochondrial membrane potential	6/71	72/18670	3.1257888551143e-07	4.71009279537771e-06	1.99070907619632e-06	BCL2/BAX/AKT1/SOD1/PARP1/BAD	6
BP	GO:0042033	chemokine biosynthetic process	4/71	16/18670	3.37573018129123e-07	5.04068307613623e-06	2.13043224111021e-06	IL6/HMOX1/IL1B/IFNG	4
BP	GO:0050755	chemokine metabolic process	4/71	16/18670	3.37573018129123e-07	5.04068307613623e-06	2.13043224111021e-06	IL6/HMOX1/IL1B/IFNG	4
BP	GO:0043627	response to estrogen	6/71	73/18670	3.39555521557026e-07	5.0474469420639e-06	2.13329097232366e-06	HMOX1/ESR1/MAPK1/CA2/MDM2/IL4R	6
BP	GO:0071375	cellular response to peptide hormone stimulus	10/71	321/18670	3.58208668298013e-07	5.30084576405132e-06	2.24038935801212e-06	RELA/AKT1/PTPN1/IL1B/NFE2L2/PARP1/IGF2/CA2/MDM2/CREB1	10
BP	GO:0009914	hormone transport	10/71	322/18670	3.68583472678191e-07	5.43002437427693e-06	2.29498637828291e-06	IL6/NOS2/DPP4/PPP3CA/IL1B/IFNG/SPP1/BAD/ABAT/CREB1	10
BP	GO:0009615	response to virus	10/71	326/18670	4.12768385310068e-07	6.053936317881e-06	2.55868121888112e-06	IL6/BCL2/RELA/CYP1A1/MAPK14/IL10RB/IL1B/IFNG/CXCL10/BAD	10
BP	GO:1903708	positive regulation of hemopoiesis	8/71	185/18670	4.98812361996106e-07	7.28354333888119e-06	3.07837158660848e-06	MAPK14/RB1/IL2/IFNG/CA2/IL4R/BAD/CREB1	8
BP	GO:0072332	intrinsic apoptotic signaling pathway by p53 class mediator	6/71	78/18670	5.04744600589793e-07	7.33769683676791e-06	3.10125942861802e-06	BCL2/BAX/CDKN1A/TP53/CHEK2/MDM2	6
BP	GO:0043062	extracellular structure organization	11/71	422/18670	5.229940698252e-07	7.56965101062789e-06	3.1992942867885e-06	IL6/DPP4/PRSS1/MMP1/ICAM1/VCAM1/MMP2/RB1/SERPINE1/MPO/SPP1	11
BP	GO:0009896	positive regulation of catabolic process	11/71	423/18670	5.35357355094359e-07	7.71475664546455e-06	3.26062282463813e-06	IL6/ADRB2/BAX/AKT1/HMOX1/PTPN1/IL1B/IFNG/NFE2L2/MDM2/BAD	11
BP	GO:0045930	negative regulation of mitotic cell cycle	10/71	338/18670	5.74441648027006e-07	8.24198886299618e-06	3.48345621801274e-06	BCL2/BAX/CDK2/CDKN1A/RB1/TP53/CCL2/CHEK2/MDM2/PCNA	10
BP	GO:0008631	intrinsic apoptotic signaling pathway in response to oxidative stress	5/71	43/18670	5.93033310240641e-07	8.43538760256084e-06	3.56519571719079e-06	BCL2/AKT1/SOD1/NFE2L2/PARP1	5
BP	GO:0045429	positive regulation of nitric oxide biosynthetic process	5/71	43/18670	5.93033310240641e-07	8.43538760256084e-06	3.56519571719079e-06	PTGS2/AKT1/ICAM1/IL1B/IFNG	5
BP	GO:0006913	nucleocytoplasmic transport	10/71	343/18670	6.56703008220193e-07	9.24963209756295e-06	3.90933414011831e-06	PTGS2/AKT1/PPP3CA/MAPK14/CDKN1A/MAPK1/TP53/IL1B/IFNG/MDM2	10
BP	GO:0050731	positive regulation of peptidyl-tyrosine phosphorylation	8/71	192/18670	6.61127441643251e-07	9.24963209756295e-06	3.90933414011831e-06	IL6/ICAM1/PTPN1/TP53/IL2/IFNG/IGF2/ERBB3	8
BP	GO:0034105	positive regulation of tissue remodeling	5/71	44/18670	6.6709467855151e-07	9.24963209756295e-06	3.90933414011831e-06	BAX/PPP3CA/IL2/SPP1/CA2	5
BP	GO:0046688	response to copper ion	5/71	44/18670	6.6709467855151e-07	9.24963209756295e-06	3.90933414011831e-06	CYP1A1/ICAM1/SOD1/IL1A/NFE2L2	5
BP	GO:1901028	regulation of mitochondrial outer membrane permeabilization involved in apoptotic signaling pathway	5/71	44/18670	6.6709467855151e-07	9.24963209756295e-06	3.90933414011831e-06	BCL2/BAX/MAPK8/TP53/BAD	5
BP	GO:1904407	positive regulation of nitric oxide metabolic process	5/71	44/18670	6.6709467855151e-07	9.24963209756295e-06	3.90933414011831e-06	PTGS2/AKT1/ICAM1/IL1B/IFNG	5
BP	GO:0050673	epithelial cell proliferation	11/71	434/18670	6.8941730948094e-07	9.51915113509248e-06	4.02324569505504e-06	BAX/AR/AKT1/HMOX1/ESR1/MAPK1/RB1/MYC/CCL2/IGFBP3/BAD	11
BP	GO:0051169	nuclear transport	10/71	346/18670	7.10862812992214e-07	9.77436367864294e-06	4.13111064567843e-06	PTGS2/AKT1/PPP3CA/MAPK14/CDKN1A/MAPK1/TP53/IL1B/IFNG/MDM2	10
BP	GO:0046883	regulation of hormone secretion	9/71	266/18670	7.27937478952675e-07	9.96461721445897e-06	4.21152083226735e-06	NOS2/DPP4/PPP3CA/IL1B/IFNG/SPP1/BAD/ABAT/CREB1	9
BP	GO:0048145	regulation of fibroblast proliferation	6/71	83/18670	7.30738595726991e-07	9.96461721445897e-06	4.21152083226735e-06	BAX/ESR1/CDKN1A/TP53/MYC/CREB1	6
BP	GO:0048144	fibroblast proliferation	6/71	84/18670	7.84603245991077e-07	1.06551058097554e-05	4.50335413011989e-06	BAX/ESR1/CDKN1A/TP53/MYC/CREB1	6
BP	GO:0006984	ER-nucleus signaling pathway	5/71	46/18670	8.37056492925867e-07	1.13208460108826e-05	4.78472758035709e-06	PTPN1/TP53/CCL2/CXCL8/NFE2L2	5
BP	GO:0017038	protein import	8/71	199/18670	8.66634757760792e-07	1.1673039594329e-05	4.93358132774672e-06	PTGS2/AKT1/PPP3CA/MAPK14/CDKN1A/MAPK1/TP53/IFNG	8
BP	GO:1902105	regulation of leukocyte differentiation	9/71	272/18670	8.76532493020184e-07	1.17583627112464e-05	4.96964293218547e-06	RB1/SOD1/MYC/IL2/IFNG/CA2/IL4R/BAD/CREB1	9
BP	GO:0001776	leukocyte homeostasis	6/71	86/18670	9.02105261265174e-07	1.20038200087705e-05	5.07338485219166e-06	IL6/BCL2/BAX/CASP3/AKT1/IL2	6
BP	GO:0008625	extrinsic apoptotic signaling pathway via death domain receptors	6/71	86/18670	9.02105261265174e-07	1.20038200087705e-05	5.07338485219166e-06	BCL2/BAX/HMOX1/ICAM1/SERPINE1/BAD	6
BP	GO:0006953	acute-phase response	5/71	47/18670	9.33950403937886e-07	1.23776559558033e-05	5.23138569104925e-06	IL6/PTGS2/F2/IL1B/IL1A	5
BP	GO:0002700	regulation of production of molecular mediator of immune response	7/71	139/18670	9.73829575740573e-07	1.28545503997756e-05	5.43294394886846e-06	IL6/HMOX1/MAPK14/IL1B/IL2/CD40LG/IL4R	7
BP	GO:0097194	execution phase of apoptosis	6/71	88/18670	1.03363495065912e-06	1.35896228572714e-05	5.74362050586429e-06	IL6/BAX/CASP3/AKT1/TP53/CASP7	6
BP	GO:0010948	negative regulation of cell cycle process	10/71	361/18670	1.04460437688251e-06	1.36793430306043e-05	5.78154051532716e-06	BCL2/BAX/CDK2/CDKN1A/RB1/TP53/CCL2/CHEK2/MDM2/PCNA	10
BP	GO:0036499	PERK-mediated unfolded protein response	4/71	21/18670	1.09426555350393e-06	1.42107942738884e-05	6.00615706950626e-06	PTPN1/CCL2/CXCL8/NFE2L2	4
BP	GO:0042135	neurotransmitter catabolic process	4/71	21/18670	1.09426555350393e-06	1.42107942738884e-05	6.00615706950626e-06	ACHE/MAOB/MAOA/ABAT	4
BP	GO:0045862	positive regulation of proteolysis	10/71	363/18670	1.09810683025501e-06	1.42107942738884e-05	6.00615706950626e-06	BAX/AKT1/MAPK14/MYC/IL1B/IFNG/NFE2L2/CYCS/MDM2/BAD	10
BP	GO:0030100	regulation of endocytosis	9/71	281/18670	1.14849531535553e-06	1.48048224245049e-05	6.25722159887367e-06	CD14/SELE/PPP3CA/PTPN1/SOD1/IL1B/CCL2/SERPINE1/IFNG	9
BP	GO:0051205	protein insertion into membrane	5/71	49/18670	1.1542001147049e-06	1.48204683989346e-05	6.26383433128813e-06	BCL2/BAX/MAPK8/TP53/BAD	5
BP	GO:0070555	response to interleukin-1	8/71	207/18670	1.16610502598616e-06	1.4915296844009e-05	6.30391333917448e-06	IL6/RELA/ICAM1/SELE/IL1B/CCL2/CXCL8/IL1A	8
BP	GO:1901215	negative regulation of neuron death	8/71	208/18670	1.20910416555304e-06	1.54055743101352e-05	6.51112789822302e-06	BCL2/BAX/AKT1/HMOX1/SOD1/CCL2/ERBB3/CREB1	8
BP	GO:1902107	positive regulation of leukocyte differentiation	7/71	144/18670	1.23521883266511e-06	1.56177093785243e-05	6.60078626046084e-06	RB1/IL2/IFNG/CA2/IL4R/BAD/CREB1	7
BP	GO:1904064	positive regulation of cation transmembrane transport	7/71	144/18670	1.23521883266511e-06	1.56177093785243e-05	6.60078626046084e-06	ADRB2/BAX/F2/CALM1/CCL2/IFNG/CXCL10	7
BP	GO:0030198	extracellular matrix organization	10/71	368/18670	1.24247549168882e-06	1.56495004678363e-05	6.61422268576814e-06	IL6/DPP4/PRSS1/MMP1/ICAM1/VCAM1/MMP2/RB1/SERPINE1/SPP1	10
BP	GO:0042359	vitamin D metabolic process	4/71	22/18670	1.33360016063666e-06	1.67333860460113e-05	7.07232424592184e-06	CYP3A4/CYP1A1/IL1B/IFNG	4
BP	GO:0035264	multicellular organism growth	7/71	146/18670	1.35506947352017e-06	1.69383684190021e-05	7.15895953913165e-06	ADRB2/BCL2/AR/TP53/SOD1/IGF2/CREB1	7
BP	GO:0007566	embryo implantation	5/71	51/18670	1.41348848320972e-06	1.75986160605383e-05	7.43801157263579e-06	PTGS2/MMP2/SOD1/IL1B/SPP1	5
BP	GO:0002262	myeloid cell homeostasis	7/71	147/18670	1.41855511275854e-06	1.75986160605383e-05	7.43801157263579e-06	IL6/BAX/CASP3/HMOX1/MAPK14/RB1/SOD1	7
BP	GO:0032388	positive regulation of intracellular transport	8/71	215/18670	1.54975543214226e-06	1.9154280621983e-05	8.09550935378869e-06	PTGS2/MAPK14/MAPK1/TP53/IL1B/IFNG/MDM2/IL4R	8
BP	GO:0051146	striated muscle cell differentiation	9/71	293/18670	1.62266913373778e-06	1.99151373442964e-05	8.41708356656866e-06	BCL2/CASP3/AKT1/PPP3CA/MAPK14/RB1/CXCL10/IGF2/IL4R	9
BP	GO:0042102	positive regulation of T cell proliferation	6/71	95/18670	1.62338543806537e-06	1.99151373442964e-05	8.41708356656866e-06	IL6/VCAM1/IL1B/IL2/IGF2/CD40LG	6
BP	GO:1903706	regulation of hemopoiesis	11/71	475/18670	1.66482099937439e-06	2.03478122145758e-05	8.59995253088134e-06	MAPK14/RB1/SOD1/MYC/IL2/IFNG/NFE2L2/CA2/IL4R/BAD/CREB1	11
BP	GO:0048511	rhythmic process	9/71	295/18670	1.71623031438939e-06	2.08987455257748e-05	8.83280313290323e-06	CASP3/NOS2/MAPK8/AHR/ESR1/TP53/SERPINE1/PCNA/CREB1	9
BP	GO:0008585	female gonad development	6/71	96/18670	1.72645015196041e-06	2.09459025789315e-05	8.85273394484345e-06	BCL2/BAX/CASP3/ICAM1/ESR1/SOD1	6
BP	GO:0001890	placenta development	7/71	152/18670	1.77463426591182e-06	2.14516229945385e-05	9.06647542831371e-06	PTGS2/AKT1/MAPK14/MAPK1/SOD1/SPP1/IGF2	7
BP	GO:0090316	positive regulation of intracellular protein transport	7/71	153/18670	1.85414130934257e-06	2.23308989811331e-05	9.43809925039917e-06	PTGS2/MAPK14/MAPK1/TP53/IL1B/IFNG/MDM2	7
BP	GO:0097345	mitochondrial outer membrane permeabilization	5/71	54/18670	1.88622050445521e-06	2.25526364663123e-05	9.53181605035529e-06	BCL2/BAX/MAPK8/TP53/BAD	5
BP	GO:1904645	response to amyloid-beta	5/71	54/18670	1.88622050445521e-06	2.25526364663123e-05	9.53181605035529e-06	ADRB2/ICAM1/VCAM1/MMP2/PARP1	5
BP	GO:2001243	negative regulation of intrinsic apoptotic signaling pathway	6/71	98/18670	1.94863302423174e-06	2.32147616605226e-05	9.81166162685563e-06	PTGS2/BCL2/AKT1/PTPN1/NFE2L2/MDM2	6
BP	GO:0070301	cellular response to hydrogen peroxide	6/71	99/18670	2.06816914919097e-06	2.44689755501036e-05	1.03417520267583e-05	IL6/RELA/NFE2L2/NQO1/MDM2/PCNA	6
BP	GO:0001541	ovarian follicle development	5/71	55/18670	2.06874066014512e-06	2.44689755501036e-05	1.03417520267583e-05	BCL2/BAX/ICAM1/ESR1/SOD1	5
BP	GO:0007259	JAK-STAT cascade	7/71	156/18670	2.11076918341855e-06	2.47004904442597e-05	1.04396012244479e-05	IL6/F2/PTPN1/IL10RB/CCL2/IL2/IFNG	7
BP	GO:0034767	positive regulation of ion transmembrane transport	7/71	156/18670	2.11076918341855e-06	2.47004904442597e-05	1.04396012244479e-05	ADRB2/BAX/F2/CALM1/CCL2/IFNG/CXCL10	7
BP	GO:0042129	regulation of T cell proliferation	7/71	156/18670	2.11076918341855e-06	2.47004904442597e-05	1.04396012244479e-05	IL6/CASP3/VCAM1/IL1B/IL2/IGF2/CD40LG	7
BP	GO:0033157	regulation of intracellular protein transport	8/71	225/18670	2.17627746688493e-06	2.53770870696829e-05	1.07255631155757e-05	PTGS2/PTPN1/MAPK14/MAPK1/TP53/IL1B/IFNG/MDM2	8
BP	GO:0043271	negative regulation of ion transport	7/71	157/18670	2.20264525281368e-06	2.55941173742434e-05	1.08172904372799e-05	PTGS2/BCL2/CALM1/AKT1/ICAM1/MAOB/ABAT	7
BP	GO:0019430	removal of superoxide radicals	4/71	25/18670	2.28644425958568e-06	2.64746177425711e-05	1.1189431741278e-05	SOD1/MPO/NFE2L2/NQO1	4
BP	GO:0001894	tissue homeostasis	8/71	227/18670	2.32451909722967e-06	2.66431151716142e-05	1.12606467631224e-05	IL6/ADRB2/BCL2/BAX/RB1/SOD1/SPP1/CA2	8
BP	GO:0046545	development of primary female sexual characteristics	6/71	101/18670	2.32521732406815e-06	2.66431151716142e-05	1.12606467631224e-05	BCL2/BAX/CASP3/ICAM1/ESR1/SOD1	6
BP	GO:0048661	positive regulation of smooth muscle cell proliferation	6/71	101/18670	2.32521732406815e-06	2.66431151716142e-05	1.12606467631224e-05	IL6/PTGS2/AKT1/HMOX1/MMP2/MDM2	6
BP	GO:1903428	positive regulation of reactive oxygen species biosynthetic process	5/71	57/18670	2.47535437422029e-06	2.8265292162377e-05	1.19462558581019e-05	PTGS2/AKT1/ICAM1/IL1B/IFNG	5
BP	GO:1900739	regulation of protein insertion into mitochondrial membrane involved in apoptotic signaling pathway	4/71	26/18670	2.69441449898458e-06	3.05240150572171e-05	1.29008995058414e-05	BCL2/MAPK8/TP53/BAD	4
BP	GO:1900740	positive regulation of protein insertion into mitochondrial membrane involved in apoptotic signaling pathway	4/71	26/18670	2.69441449898458e-06	3.05240150572171e-05	1.29008995058414e-05	BCL2/MAPK8/TP53/BAD	4
BP	GO:0032722	positive regulation of chemokine production	5/71	58/18670	2.70091284748709e-06	3.05240150572171e-05	1.29008995058414e-05	IL6/HMOX1/IL1B/IFNG/IL4R	5
BP	GO:0071887	leukocyte apoptotic process	6/71	104/18670	2.75915950367804e-06	3.10758578912544e-05	1.31341345154424e-05	IL6/BAX/CASP3/AKT1/TP53/IL2	6
BP	GO:0045931	positive regulation of mitotic cell cycle	7/71	163/18670	2.82703330335717e-06	3.17320064662539e-05	1.34114540886081e-05	AKT1/CYP1A1/RB1/IL1B/IL1A/IGF2/MDM2	7
BP	GO:0001836	release of cytochrome c from mitochondria	5/71	59/18670	2.94232025471735e-06	3.28028947316462e-05	1.38640623666447e-05	BCL2/BAX/AKT1/TP53/BAD	5
BP	GO:2000351	regulation of endothelial cell apoptotic process	5/71	59/18670	2.94232025471735e-06	3.28028947316462e-05	1.38640623666447e-05	ICAM1/CCL2/SERPINE1/NFE2L2/CD40LG	5
BP	GO:0002286	T cell activation involved in immune response	6/71	106/18670	3.08350471878432e-06	3.4261163542048e-05	1.44803960743903e-05	IL6/ICAM1/TP53/IL2/IFNG/IL4R	6
BP	GO:0071450	cellular response to oxygen radical	4/71	27/18670	3.15394091515332e-06	3.46933500666865e-05	1.46630586406251e-05	SOD1/MPO/NFE2L2/NQO1	4
BP	GO:0071451	cellular response to superoxide	4/71	27/18670	3.15394091515332e-06	3.46933500666865e-05	1.46630586406251e-05	SOD1/MPO/NFE2L2/NQO1	4
BP	GO:1902175	regulation of oxidative stress-induced intrinsic apoptotic signaling pathway	4/71	27/18670	3.15394091515332e-06	3.46933500666865e-05	1.46630586406251e-05	AKT1/SOD1/NFE2L2/PARP1	4
BP	GO:0097696	STAT cascade	7/71	166/18670	3.19079842333634e-06	3.49708889600073e-05	1.47803597677862e-05	IL6/F2/PTPN1/IL10RB/CCL2/IL2/IFNG	7
BP	GO:1902110	positive regulation of mitochondrial membrane permeability involved in apoptotic process	5/71	60/18670	3.20036620179461e-06	3.49708889600073e-05	1.47803597677862e-05	BCL2/BAX/MAPK8/TP53/BAD	5
BP	GO:0050806	positive regulation of synaptic transmission	7/71	168/18670	3.45438111984472e-06	3.76077032169014e-05	1.58948027950221e-05	PTGS2/ADRB2/MAPK1/CCL2/CA2/ABAT/CREB1	7
BP	GO:0030888	regulation of B cell proliferation	5/71	61/18670	3.47586347913786e-06	3.76077032169014e-05	1.58948027950221e-05	BCL2/CASP3/AHR/CDKN1A/IL2	5
BP	GO:2001244	positive regulation of intrinsic apoptotic signaling pathway	5/71	61/18670	3.47586347913786e-06	3.76077032169014e-05	1.58948027950221e-05	BCL2/BAX/TP53/SOD1/BAD	5
BP	GO:0030217	T cell differentiation	8/71	240/18670	3.51386061506731e-06	3.78945752605299e-05	1.60160485550884e-05	IL6/BCL2/TP53/SOD1/IL2/IFNG/IL4R/BAD	8
BP	GO:0032103	positive regulation of response to external stimulus	9/71	323/18670	3.60656381351295e-06	3.8767624054048e-05	1.63850404694142e-05	IL6/PTGS2/F2/MAPK14/IL1B/CXCL8/IL2/SERPINE1/CXCL10	9
BP	GO:1990776	response to angiotensin	4/71	28/18670	3.66905023474213e-06	3.93112525150943e-05	1.66148036945773e-05	PTGS2/RELA/NFE2L2/CA2	4
BP	GO:0001558	regulation of cell growth	10/71	416/18670	3.71890233848834e-06	3.97164327411376e-05	1.67860521154728e-05	BCL2/F2/AKT1/ESR2/CDKN1A/RB1/TP53/IL2/SPP1/IGFBP3	10
BP	GO:0002260	lymphocyte homeostasis	5/71	62/18670	3.76964823226178e-06	3.99994828503661e-05	1.69056825444131e-05	BCL2/BAX/CASP3/AKT1/IL2	5
BP	GO:1902686	mitochondrial outer membrane permeabilization involved in programmed cell death	5/71	62/18670	3.76964823226178e-06	3.99994828503661e-05	1.69056825444131e-05	BCL2/BAX/MAPK8/TP53/BAD	5
BP	GO:0010506	regulation of autophagy	9/71	327/18670	3.98635126354442e-06	4.21633306721045e-05	1.78202274770458e-05	ADRB2/BCL2/CASP3/AKT1/MAPK8/HMOX1/TP53/IFNG/BAD	9
BP	GO:0000303	response to superoxide	4/71	29/18670	4.2438991932619e-06	4.43584204402637e-05	1.87479767411003e-05	SOD1/MPO/NFE2L2/NQO1	4
BP	GO:0010575	positive regulation of vascular endothelial growth factor production	4/71	29/18670	4.2438991932619e-06	4.43584204402637e-05	1.87479767411003e-05	IL6/PTGS2/IL1B/IL1A	4
BP	GO:0043279	response to alkaloid	6/71	112/18670	4.24765480579495e-06	4.43584204402637e-05	1.87479767411003e-05	CASP3/RELA/ICAM1/MDM2/CASP7/ABAT	6
BP	GO:1990748	cellular detoxification	6/71	112/18670	4.24765480579495e-06	4.43584204402637e-05	1.87479767411003e-05	PTGS2/GSTM1/SOD1/MPO/NFE2L2/NQO1	6
BP	GO:0032386	regulation of intracellular transport	10/71	423/18670	4.31069186338798e-06	4.48747102497802e-05	1.89661853527779e-05	PTGS2/HMOX1/PTPN1/MAPK14/MAPK1/TP53/IL1B/IFNG/MDM2/IL4R	10
BP	GO:0035794	positive regulation of mitochondrial membrane permeability	5/71	64/18670	4.41554250225505e-06	4.58216674762317e-05	1.93664144835748e-05	BCL2/BAX/MAPK8/TP53/BAD	5
BP	GO:0050796	regulation of insulin secretion	7/71	176/18670	4.6977489170486e-06	4.83884988346976e-05	2.04512794117941e-05	NOS2/DPP4/PPP3CA/IL1B/IFNG/BAD/ABAT	7
BP	GO:0002688	regulation of leukocyte chemotaxis	6/71	114/18670	4.70688125028422e-06	4.83884988346976e-05	2.04512794117941e-05	IL6/MAPK14/CCL2/CXCL8/SERPINE1/CXCL10	6
BP	GO:0042035	regulation of cytokine biosynthetic process	6/71	114/18670	4.70688125028422e-06	4.83884988346976e-05	2.04512794117941e-05	IL6/RELA/HMOX1/IL1B/IFNG/IL1A	6
BP	GO:0030072	peptide hormone secretion	8/71	250/18670	4.74906771705052e-06	4.86705697710146e-05	2.05704959957239e-05	IL6/NOS2/DPP4/PPP3CA/IL1B/IFNG/BAD/ABAT	8
BP	GO:0072577	endothelial cell apoptotic process	5/71	65/18670	4.76944253199969e-06	4.87280506365293e-05	2.05947901414358e-05	ICAM1/CCL2/SERPINE1/NFE2L2/CD40LG	5
BP	GO:0000305	response to oxygen radical	4/71	30/18670	4.88277233912079e-06	4.95789191356881e-05	2.09544076091824e-05	SOD1/MPO/NFE2L2/NQO1	4
BP	GO:0071480	cellular response to gamma radiation	4/71	30/18670	4.88277233912079e-06	4.95789191356881e-05	2.09544076091824e-05	CDKN1A/TP53/CHEK2/MDM2	4
BP	GO:0046660	female sex differentiation	6/71	115/18670	4.95118046771025e-06	5.01193114829565e-05	2.11828030988572e-05	BCL2/BAX/CASP3/ICAM1/ESR1/SOD1	6
BP	GO:0040014	regulation of multicellular organism growth	5/71	66/18670	5.14521136053011e-06	5.14521136053011e-05	2.17461086210603e-05	ADRB2/BCL2/SOD1/IGF2/CREB1	5
BP	GO:0045428	regulation of nitric oxide biosynthetic process	5/71	66/18670	5.14521136053011e-06	5.14521136053011e-05	2.17461086210603e-05	PTGS2/AKT1/ICAM1/IL1B/IFNG	5
BP	GO:1902108	regulation of mitochondrial membrane permeability involved in apoptotic process	5/71	66/18670	5.14521136053011e-06	5.14521136053011e-05	2.17461086210603e-05	BCL2/BAX/MAPK8/TP53/BAD	5
BP	GO:1905710	positive regulation of membrane permeability	5/71	66/18670	5.14521136053011e-06	5.14521136053011e-05	2.17461086210603e-05	BCL2/BAX/MAPK8/TP53/BAD	5
BP	GO:0071347	cellular response to interleukin-1	7/71	179/18670	5.25108859680136e-06	5.23522428079894e-05	2.21265460033767e-05	IL6/RELA/ICAM1/IL1B/CCL2/CXCL8/IL1A	7
BP	GO:0051924	regulation of calcium ion transport	8/71	254/18670	5.33714823211072e-06	5.30499673673656e-05	2.24214375635596e-05	PTGS2/BCL2/BAX/F2/CALM1/ICAM1/CCL2/CXCL10	8
BP	GO:1901796	regulation of signal transduction by p53 class mediator	7/71	180/18670	5.44717512902424e-06	5.39810147921321e-05	2.28149424560048e-05	BCL2/AKT1/MAPK14/CDK2/TP53/CHEK2/MDM2	7
BP	GO:0050804	modulation of chemical synaptic transmission	10/71	436/18670	5.62927211698518e-06	5.55264940015048e-05	2.34681354232835e-05	PTGS2/ADRB2/ACHE/PPP3CA/MAPK1/IL1B/CCL2/CA2/ABAT/CREB1	10
BP	GO:0002285	lymphocyte activation involved in immune response	7/71	181/18670	5.64932114137414e-06	5.55264940015048e-05	2.34681354232835e-05	IL6/ICAM1/TP53/IL2/IFNG/CD40LG/IL4R	7
BP	GO:0050730	regulation of peptidyl-tyrosine phosphorylation	8/71	256/18670	5.65360666197139e-06	5.55264940015048e-05	2.34681354232835e-05	IL6/ICAM1/PTPN1/TP53/IL2/IFNG/IGF2/ERBB3	8
BP	GO:0099177	regulation of trans-synaptic signaling	10/71	437/18670	5.74382862011354e-06	5.62452060723284e-05	2.37718973032967e-05	PTGS2/ADRB2/ACHE/PPP3CA/MAPK1/IL1B/CCL2/CA2/ABAT/CREB1	10
BP	GO:0008217	regulation of blood pressure	7/71	182/18670	5.85767415134488e-06	5.71903097616512e-05	2.41713430412082e-05	PTGS2/ADRB2/NOS2/AR/HMOX1/SOD1/ABAT	7
BP	GO:0019932	second-messenger-mediated signaling	10/71	439/18670	5.97902418665159e-06	5.82028903125376e-05	2.45993077078508e-05	ADRB2/NOS2/CALM1/SELE/VCAM1/AHR/PPP3CA/CXCL8/CXCL10/ERBB3	10
BP	GO:0001660	fever generation	3/71	10/18670	6.20454528675781e-06	5.9693875936737e-05	2.52294690960691e-05	PTGS2/IL1B/IL1A	3
BP	GO:0070391	response to lipoteichoic acid	3/71	10/18670	6.20454528675781e-06	5.9693875936737e-05	2.52294690960691e-05	CD14/RELA/MAPK14	3
BP	GO:0071223	cellular response to lipoteichoic acid	3/71	10/18670	6.20454528675781e-06	5.9693875936737e-05	2.52294690960691e-05	CD14/RELA/MAPK14	3
BP	GO:1903799	negative regulation of production of miRNAs involved in gene silencing by miRNA	3/71	10/18670	6.20454528675781e-06	5.9693875936737e-05	2.52294690960691e-05	PPP3CA/ESR1/TP53	3
BP	GO:0050864	regulation of B cell activation	7/71	184/18670	6.29360417728205e-06	6.03746912355545e-05	2.55172139990781e-05	IL6/BCL2/CASP3/AHR/CDKN1A/IL2/BAD	7
BP	GO:1905477	positive regulation of protein localization to membrane	6/71	122/18670	6.96570655382749e-06	6.66284974713934e-05	2.81603697446878e-05	BCL2/AKT1/MAPK8/TP53/IFNG/BAD	6
BP	GO:1905475	regulation of protein localization to membrane	7/71	187/18670	6.99788956373643e-06	6.67428773419948e-05	2.82087121142402e-05	BCL2/AR/AKT1/MAPK8/TP53/IFNG/BAD	7
BP	GO:0006367	transcription initiation from RNA polymerase II promoter	7/71	188/18670	7.24672890442212e-06	6.89170183994035e-05	2.91276074574831e-05	BAX/AR/ESR1/ESR2/CDKN1A/TP53/CREB1	7
BP	GO:0042089	cytokine biosynthetic process	6/71	123/18670	7.3011086908436e-06	6.92346513786893e-05	2.92618542509612e-05	IL6/RELA/HMOX1/IL1B/IFNG/IL1A	6
BP	GO:0071479	cellular response to ionizing radiation	5/71	71/18670	7.38637286084625e-06	6.98424940996924e-05	2.95187574743516e-05	MAPK14/CDKN1A/TP53/CHEK2/MDM2	5
BP	GO:0008637	apoptotic mitochondrial changes	6/71	124/18670	7.64949752180663e-06	7.19183527691221e-05	3.03961140092781e-05	BCL2/BAX/AKT1/MAPK8/TP53/BAD	6
BP	GO:0042107	cytokine metabolic process	6/71	124/18670	7.64949752180663e-06	7.19183527691221e-05	3.03961140092781e-05	IL6/RELA/HMOX1/IL1B/IFNG/IL1A	6
BP	GO:0031334	positive regulation of protein complex assembly	8/71	268/18670	7.90607734874598e-06	7.37770739575906e-05	3.11816979246595e-05	BAX/MMP1/ICAM1/ESR1/TP53/IFNG/PARP1/CREB1	8
BP	GO:0002532	production of molecular mediator involved in inflammatory response	5/71	72/18670	7.91426793363245e-06	7.37770739575906e-05	3.11816979246595e-05	NOS2/F2/MAPK14/SERPINE1/IL4R	5
BP	GO:0061180	mammary gland epithelium development	5/71	72/18670	7.91426793363245e-06	7.37770739575906e-05	3.11816979246595e-05	BAX/AR/AKT1/ESR1/MAPK1	5
BP	GO:0010574	regulation of vascular endothelial growth factor production	4/71	34/18670	8.16854995142081e-06	7.59329995484188e-05	3.20928945459824e-05	IL6/PTGS2/IL1B/IL1A	4
BP	GO:0045927	positive regulation of growth	8/71	270/18670	8.34679929282032e-06	7.73720159165929e-05	3.27010912566142e-05	BCL2/F2/AKT1/MAPK14/MAPK1/IL2/IGF2/CREB1	8
BP	GO:0006801	superoxide metabolic process	5/71	73/18670	8.47123208157915e-06	7.82069158013603e-05	3.30539596289641e-05	NOS2/SOD1/MPO/NFE2L2/NQO1	5
BP	GO:0031652	positive regulation of heat generation	3/71	11/18670	8.50796447657223e-06	7.82069158013603e-05	3.30539596289641e-05	PTGS2/IL1B/ABAT	3
BP	GO:0045899	positive regulation of RNA polymerase II transcriptional preinitiation complex assembly	3/71	11/18670	8.50796447657223e-06	7.82069158013603e-05	3.30539596289641e-05	ESR1/TP53/CREB1	3
BP	GO:0002687	positive regulation of leukocyte migration	6/71	128/18670	9.18061320921069e-06	8.36012232226604e-05	3.53338503253668e-05	IL6/ICAM1/MAPK14/CXCL8/SERPINE1/CXCL10	6
BP	GO:0001893	maternal placenta development	4/71	35/18670	9.19613455449265e-06	8.36012232226604e-05	3.53338503253668e-05	PTGS2/AKT1/MAPK1/SPP1	4
BP	GO:0032735	positive regulation of interleukin-12 production	4/71	35/18670	9.19613455449265e-06	8.36012232226604e-05	3.53338503253668e-05	RELA/MAPK14/IFNG/CD40LG	4
BP	GO:0071312	cellular response to alkaloid	4/71	35/18670	9.19613455449265e-06	8.36012232226604e-05	3.53338503253668e-05	CASP3/ICAM1/MDM2/CASP7	4
BP	GO:0023061	signal release	10/71	462/18670	9.34642976308166e-06	8.47341159839821e-05	3.58126646503274e-05	IL6/NOS2/DPP4/PPP3CA/IL1B/IFNG/SPP1/BAD/ABAT/CREB1	10
BP	GO:0032102	negative regulation of response to external stimulus	9/71	365/18670	9.675343096752e-06	8.74757047103605e-05	3.6971390348079e-05	F2/CDKN1A/RB1/SOD1/CCL2/IL2/SERPINE1/SPP1/ABAT	9
BP	GO:0010573	vascular endothelial growth factor production	4/71	36/18670	1.03160142865901e-05	9.23636809778657e-05	3.90372814340262e-05	IL6/PTGS2/IL1B/IL1A	4
BP	GO:1901099	negative regulation of signal transduction in absence of ligand	4/71	36/18670	1.03160142865901e-05	9.23636809778657e-05	3.90372814340262e-05	BCL2/AKT1/IL1B/IL1A	4
BP	GO:2001240	negative regulation of extrinsic apoptotic signaling pathway in absence of ligand	4/71	36/18670	1.03160142865901e-05	9.23636809778657e-05	3.90372814340262e-05	BCL2/AKT1/IL1B/IL1A	4
BP	GO:0046902	regulation of mitochondrial membrane permeability	5/71	76/18670	1.03279388729795e-05	9.23636809778657e-05	3.90372814340262e-05	BCL2/BAX/MAPK8/TP53/BAD	5
BP	GO:0030183	B cell differentiation	6/71	131/18670	1.04846270411422e-05	9.32594858106987e-05	3.94158911321135e-05	BCL2/BAX/VCAM1/TP53/CD40LG/BAD	6
BP	GO:0098754	detoxification	6/71	131/18670	1.04846270411422e-05	9.32594858106987e-05	3.94158911321135e-05	PTGS2/GSTM1/SOD1/MPO/NFE2L2/NQO1	6
BP	GO:0042368	vitamin D biosynthetic process	3/71	12/18670	1.13129946838374e-05	0.000100088156720277	4.23020120109623e-05	CYP3A4/IL1B/IFNG	3
BP	GO:0045080	positive regulation of chemokine biosynthetic process	3/71	12/18670	1.13129946838374e-05	0.000100088156720277	4.23020120109623e-05	HMOX1/IL1B/IFNG	3
BP	GO:0014037	Schwann cell differentiation	4/71	37/18670	1.15333085962597e-05	0.00010095469063039	4.26682504259225e-05	RELA/AKT1/SOD1/ERBB3	4
BP	GO:0033280	response to vitamin D	4/71	37/18670	1.15333085962597e-05	0.00010095469063039	4.26682504259225e-05	PTGS2/CXCL10/SPP1/TYR	4
BP	GO:0034405	response to fluid shear stress	4/71	37/18670	1.15333085962597e-05	0.00010095469063039	4.26682504259225e-05	PTGS2/AKT1/NFE2L2/CA2	4
BP	GO:0042307	positive regulation of protein import into nucleus	4/71	37/18670	1.15333085962597e-05	0.00010095469063039	4.26682504259225e-05	PTGS2/MAPK14/MAPK1/IFNG	4
BP	GO:0032355	response to estradiol	6/71	134/18670	1.19347443295109e-05	0.000103917298911308	4.39203894920203e-05	PTGS2/CASP3/ESR1/NQO1/PCNA/BAD	6
BP	GO:0046683	response to organophosphorus	6/71	134/18670	1.19347443295109e-05	0.000103917298911308	4.39203894920203e-05	PTGS2/RELA/AHR/SOD1/IL1B/TYR	6
BP	GO:0031647	regulation of protein stability	8/71	284/18670	1.20534067698384e-05	0.000104674321948596	4.42403434073015e-05	BCL2/CASP3/CDKN1A/MAPK1/TP53/CHEK2/MDM2/CREB1	8
BP	GO:0002573	myeloid leukocyte differentiation	7/71	204/18670	1.23444332921788e-05	0.000105979135994039	4.47918198379908e-05	MAPK14/RB1/MYC/IFNG/PARP1/CA2/CREB1	7
BP	GO:0035265	organ growth	7/71	204/18670	1.23444332921788e-05	0.000105979135994039	4.47918198379908e-05	BCL2/AR/AKT1/ESR1/MAPK14/MAPK1/SOD1	7
BP	GO:0045766	positive regulation of angiogenesis	7/71	204/18670	1.23444332921788e-05	0.000105979135994039	4.47918198379908e-05	PTGS2/HMOX1/IL1B/CXCL8/SERPINE1/IL1A/NFE2L2	7
BP	GO:0015980	energy derivation by oxidation of organic compounds	8/71	285/18670	1.23642325326378e-05	0.000105979135994039	4.47918198379908e-05	NOS2/CALM1/AKT1/TP53/MYC/IFNG/IGF2/CYCS	8
BP	GO:0051348	negative regulation of transferase activity	8/71	285/18670	1.23642325326378e-05	0.000105979135994039	4.47918198379908e-05	CASP3/AKT1/PTPN1/CDKN1A/RB1/TP53/IL1B/IFNG	8
BP	GO:0060359	response to ammonium ion	6/71	135/18670	1.24526534009301e-05	0.00010646050834992	4.49952706742087e-05	CASP3/RELA/MAPK1/MDM2/CASP7/ABAT	6
BP	GO:0071260	cellular response to mechanical stimulus	5/71	79/18670	1.24883621567666e-05	0.000106489909863901	4.50076971514095e-05	PTGS2/AKT1/MAPK8/IL1B/BAD	5
BP	GO:0051403	stress-activated MAPK cascade	8/71	286/18670	1.26817929154595e-05	0.000107860609847981	4.55870201111879e-05	AKT1/MAPK8/PTPN1/MAPK14/MAPK1/MYC/IL1B/CD40LG	8
BP	GO:1904037	positive regulation of epithelial cell apoptotic process	4/71	38/18670	1.28532479001405e-05	0.000109037835656719	4.60845716890437e-05	IL6/CCL2/CD40LG/BAD	4
BP	GO:0022617	extracellular matrix disassembly	5/71	80/18670	1.32817860664216e-05	0.000112384343638952	4.7498965014868e-05	IL6/DPP4/PRSS1/MMP1/MMP2	5
BP	GO:0034605	cellular response to heat	6/71	137/18670	1.35430429988163e-05	0.00011366309712503	4.80394270145659e-05	PTGS2/HMOX1/CDKN1A/MAPK1/IL1A/CXCL10	6
BP	GO:0072655	establishment of protein localization to mitochondrion	6/71	137/18670	1.35430429988163e-05	0.00011366309712503	4.80394270145659e-05	BCL2/BAX/AKT1/MAPK8/TP53/BAD	6
BP	GO:0002064	epithelial cell development	7/71	207/18670	1.35706849294732e-05	0.00011366309712503	4.80394270145659e-05	AR/ICAM1/ESR1/CDKN1A/SOD1/IL1B/BAD	7
BP	GO:0030073	insulin secretion	7/71	207/18670	1.35706849294732e-05	0.00011366309712503	4.80394270145659e-05	NOS2/DPP4/PPP3CA/IL1B/IFNG/BAD/ABAT	7
BP	GO:0070838	divalent metal ion transport	10/71	483/18670	1.37452717933684e-05	0.000114833916248394	4.85342708226866e-05	PTGS2/BCL2/BAX/F2/CALM1/ICAM1/PPP3CA/CCL2/IFNG/CXCL10	10
BP	GO:0016049	cell growth	10/71	484/18670	1.39931327469508e-05	0.000116382668889384	4.91888472977459e-05	BCL2/F2/AKT1/ESR2/CDKN1A/RB1/TP53/IL2/SPP1/IGFBP3	10
BP	GO:0090276	regulation of peptide hormone secretion	7/71	208/18670	1.40011877421471e-05	0.000116382668889384	4.91888472977459e-05	NOS2/DPP4/PPP3CA/IL1B/IFNG/BAD/ABAT	7
BP	GO:0048708	astrocyte differentiation	5/71	81/18670	1.41140039822478e-05	0.000116752789011681	4.93452776524649e-05	IL6/F2/MAPK1/IL1B/IFNG	5
BP	GO:0009308	amine metabolic process	6/71	138/18670	1.41164735805033e-05	0.000116752789011681	4.93452776524649e-05	CYP1A1/VCAM1/MAOB/MAOA/NQO1/ABAT	6
BP	GO:0045765	regulation of angiogenesis	9/71	383/18670	1.42012081753598e-05	0.000117159967446719	4.95173706114521e-05	IL6/PTGS2/HMOX1/IL1B/CXCL8/SERPINE1/IL1A/NFE2L2/CXCL10	9
BP	GO:1904591	positive regulation of protein import	4/71	39/18670	1.42811715655835e-05	0.000117525850789091	4.96720103016096e-05	PTGS2/MAPK14/MAPK1/IFNG	4
BP	GO:0031650	regulation of heat generation	3/71	13/18670	1.46667632476529e-05	0.000120150833875105	5.07814529137208e-05	PTGS2/IL1B/ABAT	3
BP	GO:0033135	regulation of peptidyl-serine phosphorylation	6/71	139/18670	1.47093748138008e-05	0.000120150833875105	5.07814529137208e-05	IL6/PTGS2/BCL2/BAX/AKT1/IFNG	6
BP	GO:0050715	positive regulation of cytokine secretion	6/71	139/18670	1.47093748138008e-05	0.000120150833875105	5.07814529137208e-05	CD14/MAPK14/IL1B/IFNG/IL1A/IL4R	6
BP	GO:0042692	muscle cell differentiation	9/71	385/18670	1.48007071274937e-05	0.000120598354372171	5.0970596345495e-05	BCL2/CASP3/AKT1/PPP3CA/MAPK14/RB1/CXCL10/IGF2/IL4R	9
BP	GO:0097529	myeloid leukocyte migration	7/71	210/18670	1.48961744189413e-05	0.000121077279759868	5.11730129766587e-05	IL6/MAPK14/IL1B/CCL2/CXCL8/SERPINE1/CXCL10	7
BP	GO:0032642	regulation of chemokine production	5/71	82/18670	1.49863457238328e-05	0.00012151091127432	5.13562862642659e-05	IL6/HMOX1/IL1B/IFNG/IL4R	5
BP	GO:0072511	divalent inorganic cation transport	10/71	489/18670	1.52911776294467e-05	0.000123678642591113	5.22724725464832e-05	PTGS2/BCL2/BAX/F2/CALM1/ICAM1/PPP3CA/CCL2/IFNG/CXCL10	10
BP	GO:0051281	positive regulation of release of sequestered calcium ion into cytosol	4/71	40/18670	1.582252591241e-05	0.00012766341200722	5.3956625489495e-05	BAX/F2/CALM1/CXCL10	4
BP	GO:0006970	response to osmotic stress	5/71	83/18670	1.59001666935831e-05	0.000127976951436156	5.40891421540374e-05	PTGS2/BAX/CASP3/TP53/BAD	5
BP	GO:0070585	protein localization to mitochondrion	6/71	141/18670	1.59555784062881e-05	0.000128110483554138	5.41455791735989e-05	BCL2/BAX/AKT1/MAPK8/TP53/BAD	6
BP	GO:2001020	regulation of response to DNA damage stimulus	7/71	214/18670	1.68286142113077e-05	0.000134366179107882	5.67895334347506e-05	BCL2/TP53/MYC/PARP1/CHEK2/MDM2/PCNA	7
BP	GO:0014910	regulation of smooth muscle cell migration	5/71	84/18670	1.68568479244433e-05	0.000134366179107882	5.67895334347506e-05	BCL2/SERPINE1/NFE2L2/IGFBP3/MDM2	5
BP	GO:0046889	positive regulation of lipid biosynthetic process	5/71	84/18670	1.68568479244433e-05	0.000134366179107882	5.67895334347506e-05	PTGS2/AKT1/IL1B/IFNG/CREB1	5
BP	GO:0030879	mammary gland development	6/71	143/18670	1.72857142570363e-05	0.000136466165187129	5.76770873597913e-05	BAX/AR/AKT1/ESR1/MAPK1/CREB1	6
BP	GO:0035296	regulation of tube diameter	6/71	143/18670	1.72857142570363e-05	0.000136466165187129	5.76770873597913e-05	PTGS2/ADRB2/AKT1/HMOX1/ICAM1/SOD1	6
BP	GO:0050880	regulation of blood vessel size	6/71	143/18670	1.72857142570363e-05	0.000136466165187129	5.76770873597913e-05	PTGS2/ADRB2/AKT1/HMOX1/ICAM1/SOD1	6
BP	GO:0097746	regulation of blood vessel diameter	6/71	143/18670	1.72857142570363e-05	0.000136466165187129	5.76770873597913e-05	PTGS2/ADRB2/AKT1/HMOX1/ICAM1/SOD1	6
BP	GO:0043281	regulation of cysteine-type endopeptidase activity involved in apoptotic process	7/71	215/18670	1.73428065740681e-05	0.000136590123375715	5.77294779817616e-05	PTGS2/BAX/AKT1/MYC/CYCS/MDM2/BAD	7
BP	GO:0002699	positive regulation of immune effector process	7/71	216/18670	1.78699260836622e-05	0.000140406562085917	5.93424863680512e-05	IL6/HMOX1/MAPK14/IL1B/IL2/IFNG/IL4R	7
BP	GO:0035150	regulation of tube size	6/71	144/18670	1.7983561884183e-05	0.000140963786740627	5.95779959908549e-05	PTGS2/ADRB2/AKT1/HMOX1/ICAM1/SOD1	6
BP	GO:0008406	gonad development	7/71	217/18670	1.84102258253082e-05	0.000143966220908808	6.08469673697515e-05	BCL2/BAX/CASP3/AR/ICAM1/ESR1/SOD1	7
BP	GO:0051712	positive regulation of killing of cells of other organism	3/71	14/18670	1.86158618059615e-05	0.000145230127564238	6.13811543931789e-05	NOS2/IFNG/BAD	3
BP	GO:0071901	negative regulation of protein serine/threonine kinase activity	6/71	145/18670	1.87039754140089e-05	0.000145573393552428	6.1526234914503e-05	CASP3/AKT1/PTPN1/CDKN1A/RB1/IL1B	6
BP	GO:0070542	response to fatty acid	5/71	86/18670	1.89044437068825e-05	0.00014644287378571	6.18937185856668e-05	PTGS2/PON1/AKT1/BAD/CREB1	5
BP	GO:0090559	regulation of membrane permeability	5/71	86/18670	1.89044437068825e-05	0.00014644287378571	6.18937185856668e-05	BCL2/BAX/MAPK8/TP53/BAD	5
BP	GO:0045834	positive regulation of lipid metabolic process	6/71	146/18670	1.94474999543156e-05	0.000149945677217854	6.33741697970197e-05	PTGS2/F2/AKT1/IL1B/IFNG/CREB1	6
BP	GO:0055123	digestive system development	6/71	146/18670	1.94474999543156e-05	0.000149945677217854	6.33741697970197e-05	BCL2/CYP1A1/CDKN1A/RB1/CXCL8/IGF2	6
BP	GO:0060326	cell chemotaxis	8/71	304/18670	1.96907396821039e-05	0.000151467228323876	6.40172496105695e-05	IL6/VCAM1/MAPK14/IL1B/CCL2/CXCL8/SERPINE1/CXCL10	8
BP	GO:0002690	positive regulation of leukocyte chemotaxis	5/71	87/18670	1.99982488399893e-05	0.000152764400861029	6.4565496376671e-05	IL6/MAPK14/CXCL8/SERPINE1/CXCL10	5
BP	GO:0045844	positive regulation of striated muscle tissue development	5/71	87/18670	1.99982488399893e-05	0.000152764400861029	6.4565496376671e-05	BCL2/MAPK14/MAPK1/ERBB3/CREB1	5
BP	GO:0048636	positive regulation of muscle organ development	5/71	87/18670	1.99982488399893e-05	0.000152764400861029	6.4565496376671e-05	BCL2/MAPK14/MAPK1/ERBB3/CREB1	5
BP	GO:0002526	acute inflammatory response	7/71	220/18670	2.01127894021184e-05	0.00015328453816857	6.47853311238773e-05	IL6/PTGS2/F2/ICAM1/VCAM1/IL1B/IL1A	7
BP	GO:0043524	negative regulation of neuron apoptotic process	6/71	147/18670	2.02146890965095e-05	0.000153706161332906	6.49635291119938e-05	BCL2/BAX/HMOX1/SOD1/CCL2/ERBB3	6
BP	GO:1901863	positive regulation of muscle tissue development	5/71	88/18670	2.11406954598285e-05	0.000159964661352229	6.76086686735897e-05	BCL2/MAPK14/MAPK1/ERBB3/CREB1	5
BP	GO:0006775	fat-soluble vitamin metabolic process	4/71	43/18670	2.11831990942195e-05	0.000159964661352229	6.76086686735897e-05	CYP3A4/CYP1A1/IL1B/IFNG	4
BP	GO:1904646	cellular response to amyloid-beta	4/71	43/18670	2.11831990942195e-05	0.000159964661352229	6.76086686735897e-05	ADRB2/ICAM1/VCAM1/PARP1	4
BP	GO:0009895	negative regulation of catabolic process	8/71	308/18670	2.16259866040727e-05	0.000162935515510137	6.88642928392125e-05	BCL2/NOS2/RELA/AKT1/HMOX1/MAPK14/TP53/IL1B	8
BP	GO:0009267	cellular response to starvation	6/71	149/18670	2.18223182560575e-05	0.000163667386920431	6.91736164815219e-05	BCL2/MAPK8/CDKN1A/MAPK1/TP53/NFE2L2	6
BP	GO:0014074	response to purine-containing compound	6/71	149/18670	2.18223182560575e-05	0.000163667386920431	6.91736164815219e-05	PTGS2/RELA/AHR/SOD1/IL1B/TYR	6
BP	GO:0045137	development of primary sexual characteristics	7/71	223/18670	2.19434214320875e-05	0.000164202473301335	6.93997694176295e-05	BCL2/BAX/CASP3/AR/ICAM1/ESR1/SOD1	7
BP	GO:0032602	chemokine production	5/71	89/18670	2.2333293302812e-05	0.000166365390291827	7.03139209367372e-05	IL6/HMOX1/IL1B/IFNG/IL4R	5
BP	GO:0046427	positive regulation of JAK-STAT cascade	5/71	89/18670	2.2333293302812e-05	0.000166365390291827	7.03139209367372e-05	IL6/F2/IL10RB/IL2/IFNG	5
BP	GO:0030595	leukocyte chemotaxis	7/71	224/18670	2.25833631946373e-05	0.000167849321041223	7.094110059956e-05	IL6/MAPK14/IL1B/CCL2/CXCL8/SERPINE1/CXCL10	7
BP	GO:0042362	fat-soluble vitamin biosynthetic process	3/71	15/18670	2.32063501922971e-05	0.000171149266669854	7.23358144617405e-05	CYP3A4/IL1B/IFNG	3
BP	GO:0045898	regulation of RNA polymerase II transcriptional preinitiation complex assembly	3/71	15/18670	2.32063501922971e-05	0.000171149266669854	7.23358144617405e-05	ESR1/TP53/CREB1	3
BP	GO:1900119	positive regulation of execution phase of apoptosis	3/71	15/18670	2.32063501922971e-05	0.000171149266669854	7.23358144617405e-05	IL6/BAX/TP53	3
BP	GO:0061756	leukocyte adhesion to vascular endothelial cell	4/71	44/18670	2.32348095357862e-05	0.000171149266669854	7.23358144617405e-05	RELA/ICAM1/SELE/VCAM1	4
BP	GO:0071674	mononuclear cell migration	5/71	90/18670	2.35775779240999e-05	0.000172902238110066	7.30767035074441e-05	IL6/MAPK14/CCL2/SERPINE1/CXCL10	5
BP	GO:1903035	negative regulation of response to wounding	5/71	90/18670	2.35775779240999e-05	0.000172902238110066	7.30767035074441e-05	F2/CDKN1A/SERPINE1/SPP1/ABAT	5
BP	GO:0007517	muscle organ development	9/71	410/18670	2.43221573706992e-05	0.000177573272839175	7.50509047884872e-05	BCL2/ACHE/PPP3CA/MAPK14/MAPK1/RB1/CXCL10/ERBB3/CREB1	9
BP	GO:0019216	regulation of lipid metabolic process	9/71	410/18670	2.43221573706992e-05	0.000177573272839175	7.50509047884872e-05	PTGS2/F2/AKT1/CYP1A1/RB1/SOD1/IL1B/IFNG/CREB1	9
BP	GO:0000187	activation of MAPK activity	6/71	152/18670	2.44255793466877e-05	0.000177934683982494	7.520365431477e-05	PTPN1/MAPK14/MAPK1/SOD1/IL1B/CD40LG	6
BP	GO:0014909	smooth muscle cell migration	5/71	91/18670	2.48751107132124e-05	0.000180412890887035	7.62510623366257e-05	BCL2/SERPINE1/NFE2L2/IGFBP3/MDM2	5
BP	GO:0045639	positive regulation of myeloid cell differentiation	5/71	91/18670	2.48751107132124e-05	0.000180412890887035	7.62510623366257e-05	MAPK14/RB1/IFNG/CA2/CREB1	5
BP	GO:0062013	positive regulation of small molecule metabolic process	6/71	153/18670	2.53468625318854e-05	0.000182820128898763	7.7268475531375e-05	PTGS2/NOS2/AKT1/IL1B/IFNG/IGF2	6
BP	GO:0031098	stress-activated protein kinase signaling cascade	8/71	315/18670	2.5397526436896e-05	0.000182820128898763	7.7268475531375e-05	AKT1/MAPK8/PTPN1/MAPK14/MAPK1/MYC/IL1B/CD40LG	8
BP	GO:0042771	intrinsic apoptotic signaling pathway in response to DNA damage by p53 class mediator	4/71	45/18670	2.54286179286461e-05	0.000182820128898763	7.7268475531375e-05	BCL2/CDKN1A/TP53/CHEK2	4
BP	GO:0048538	thymus development	4/71	45/18670	2.54286179286461e-05	0.000182820128898763	7.7268475531375e-05	BCL2/MAPK1/SOD1/TYR	4
BP	GO:1904894	positive regulation of STAT cascade	5/71	92/18670	2.62274789053071e-05	0.000188153653016333	7.95226763147183e-05	IL6/F2/IL10RB/IL2/IFNG	5
BP	GO:1904018	positive regulation of vasculature development	7/71	230/18670	2.67550864414773e-05	0.000191522310752441	8.09464311792613e-05	PTGS2/HMOX1/IL1B/CXCL8/SERPINE1/IL1A/NFE2L2	7
BP	GO:0036473	cell death in response to oxidative stress	5/71	93/18670	2.76362955881804e-05	0.000196975756891999	8.32513167087395e-05	BCL2/AKT1/SOD1/NFE2L2/PARP1	5
BP	GO:1901655	cellular response to ketone	5/71	93/18670	2.76362955881804e-05	0.000196975756891999	8.32513167087395e-05	AR/AKT1/ICAM1/AHR/SPP1	5
BP	GO:1904036	negative regulation of epithelial cell apoptotic process	4/71	46/18670	2.77706713987147e-05	0.000197506930206376	8.34758157969532e-05	HMOX1/ICAM1/SERPINE1/NFE2L2	4
BP	GO:0042445	hormone metabolic process	7/71	232/18670	2.82792523767834e-05	0.000200691468480398	8.48217530260056e-05	ACHE/CYP3A4/CYP1A1/ESR1/IL1B/IFNG/SPP1	7
BP	GO:0045986	negative regulation of smooth muscle contraction	3/71	16/18670	2.84837603094127e-05	0.000200847027822782	8.48874997975075e-05	PTGS2/ADRB2/SOD1	3
BP	GO:0060965	negative regulation of gene silencing by miRNA	3/71	16/18670	2.84837603094127e-05	0.000200847027822782	8.48874997975075e-05	PPP3CA/ESR1/TP53	3
BP	GO:1900451	positive regulation of glutamate receptor signaling pathway	3/71	16/18670	2.84837603094127e-05	0.000200847027822782	8.48874997975075e-05	ADRB2/CCL2/IFNG	3
BP	GO:2001239	regulation of extrinsic apoptotic signaling pathway in absence of ligand	4/71	47/18670	3.02671105610194e-05	0.000212966876015702	9.00099236748979e-05	BCL2/AKT1/IL1B/IL1A	4
BP	GO:1901342	regulation of vasculature development	9/71	422/18670	3.04901448367076e-05	0.00021407974034284	9.0480273031663e-05	IL6/PTGS2/HMOX1/IL1B/CXCL8/SERPINE1/IL1A/NFE2L2/CXCL10	9
BP	GO:0002702	positive regulation of production of molecular mediator of immune response	5/71	95/18670	3.06298560532231e-05	0.000214604086997104	9.07018868488559e-05	IL6/MAPK14/IL1B/IL2/IL4R	5
BP	GO:0006469	negative regulation of protein kinase activity	7/71	235/18670	3.06991751315659e-05	0.000214634063419846	9.07145563098233e-05	CASP3/AKT1/PTPN1/CDKN1A/RB1/IL1B/IFNG	7
BP	GO:0090199	regulation of release of cytochrome c from mitochondria	4/71	48/18670	3.29241676696526e-05	0.000229703495369669	9.70836144704344e-05	BAX/AKT1/TP53/BAD	4
BP	GO:0051607	defense response to virus	7/71	238/18670	3.32871870512027e-05	0.000231746238964069	9.79469750007629e-05	IL6/BCL2/RELA/IL10RB/IL1B/IFNG/CXCL10	7
BP	GO:2000116	regulation of cysteine-type endopeptidase activity	7/71	239/18670	3.41887452137214e-05	0.000237521808853222	0.000100388005336689	PTGS2/BAX/AKT1/MYC/CYCS/MDM2/BAD	7
BP	GO:0006978	DNA damage response, signal transduction by p53 class mediator resulting in transcription of p21 class mediator	3/71	17/18670	3.44930999799061e-05	0.00023763513556094	0.000100435902589552	CDKN1A/TP53/CHEK2	3
BP	GO:0010224	response to UV-B	3/71	17/18670	3.44930999799061e-05	0.00023763513556094	0.000100435902589552	BCL2/RELA/CDKN1A	3
BP	GO:0050665	hydrogen peroxide biosynthetic process	3/71	17/18670	3.44930999799061e-05	0.00023763513556094	0.000100435902589552	CYP1A1/MAOB/SOD1	3
BP	GO:0051709	regulation of killing of cells of other organism	3/71	17/18670	3.44930999799061e-05	0.00023763513556094	0.000100435902589552	NOS2/IFNG/BAD	3
BP	GO:0050663	cytokine secretion	7/71	240/18670	3.51103082703333e-05	0.000241383369358542	0.00010202008433814	CD14/NOS2/MAPK14/IL1B/IFNG/IL1A/IL4R	7
BP	GO:0008202	steroid metabolic process	8/71	331/18670	3.6132692367871e-05	0.000247895810424063	0.000104772551455146	PON1/CYP3A4/CYP1A1/ESR1/SOD1/IL1B/IFNG/SPP1	8
BP	GO:0032147	activation of protein kinase activity	8/71	333/18670	3.77084307166042e-05	0.000258169753868867	0.000109114808253987	ADRB2/AKT1/PTPN1/MAPK14/MAPK1/SOD1/IL1B/CD40LG	8
BP	GO:0006816	calcium ion transport	9/71	434/18670	3.79395306597584e-05	0.000258678618134717	0.00010932987847799	PTGS2/BCL2/BAX/F2/CALM1/ICAM1/PPP3CA/CCL2/CXCL10	9
BP	GO:0042391	regulation of membrane potential	9/71	434/18670	3.79395306597584e-05	0.000258678618134717	0.00010932987847799	ADRB2/BCL2/BAX/AKT1/PPP3CA/SOD1/PARP1/BAD/ABAT	9
BP	GO:0046632	alpha-beta T cell differentiation	5/71	101/18670	4.11410750426521e-05	0.000279139810151822	0.000117977750702126	IL6/BCL2/IL2/IFNG/IL4R	5
BP	GO:1903426	regulation of reactive oxygen species biosynthetic process	5/71	101/18670	4.11410750426521e-05	0.000279139810151822	0.000117977750702126	PTGS2/AKT1/ICAM1/IL1B/IFNG	5
BP	GO:0042772	DNA damage response, signal transduction resulting in transcription	3/71	18/18670	4.12788567739664e-05	0.000279139810151822	0.000117977750702126	CDKN1A/TP53/CHEK2	3
BP	GO:0051023	regulation of immunoglobulin secretion	3/71	18/18670	4.12788567739664e-05	0.000279139810151822	0.000117977750702126	IL6/IL2/CD40LG	3
BP	GO:0097366	response to bronchodilator	4/71	51/18670	4.19227054502655e-05	0.000282913963161301	0.000119572887141539	ICAM1/PPP3CA/CDK2/SOD1	4
BP	GO:0010522	regulation of calcium ion transport into cytosol	5/71	102/18670	4.31347809236069e-05	0.000289907896227908	0.000122528855662513	BCL2/BAX/F2/CALM1/CXCL10	5
BP	GO:0098869	cellular oxidant detoxification	5/71	102/18670	4.31347809236069e-05	0.000289907896227908	0.000122528855662513	PTGS2/SOD1/MPO/NFE2L2/NQO1	5
BP	GO:0051100	negative regulation of binding	6/71	169/18670	4.43107619904293e-05	0.000296949577587628	0.000125505004881533	ADRB2/BAX/AKT1/MAPK8/HMOX1/PPP3CA	6
BP	GO:0006352	DNA-templated transcription, initiation	7/71	249/18670	4.4362467197182e-05	0.000296949577587628	0.000125505004881533	BAX/AR/ESR1/ESR2/CDKN1A/TP53/CREB1	7
BP	GO:0018958	phenol-containing compound metabolic process	5/71	103/18670	4.52024866722296e-05	0.00030195993121125	0.000127622618454516	BCL2/MAOB/MAOA/TYR/ABAT	5
BP	GO:0033044	regulation of chromosome organization	8/71	342/18670	4.55299982064379e-05	0.000303533321376253	0.000128287607918193	MAPK8/MAPK1/RB1/TP53/MYC/IL1B/PARP1/IGF2	8
BP	GO:0016241	regulation of macroautophagy	6/71	171/18670	4.73192644939761e-05	0.000314365477191208	0.000132865791795327	ADRB2/CASP3/AKT1/MAPK8/HMOX1/TP53	6
BP	GO:0014812	muscle cell migration	5/71	104/18670	4.73460890544797e-05	0.000314365477191208	0.000132865791795327	BCL2/SERPINE1/NFE2L2/IGFBP3/MDM2	5
BP	GO:0010721	negative regulation of cell development	8/71	344/18670	4.74406083761277e-05	0.000314365477191208	0.000132865791795327	IL6/BCL2/F2/PPP3CA/TP53/IL1B/SPP1/MDM2	8
BP	GO:0010043	response to zinc ion	4/71	53/18670	4.88430366780789e-05	0.000320716711704546	0.000135550125361571	VCAM1/PARP1/CA2/CREB1	4
BP	GO:0045840	positive regulation of mitotic nuclear division	4/71	53/18670	4.88430366780789e-05	0.000320716711704546	0.000135550125361571	RB1/IL1B/IL1A/IGF2	4
BP	GO:0060149	negative regulation of posttranscriptional gene silencing	3/71	19/18670	4.88850018143596e-05	0.000320716711704546	0.000135550125361571	PPP3CA/ESR1/TP53	3
BP	GO:0060967	negative regulation of gene silencing by RNA	3/71	19/18670	4.88850018143596e-05	0.000320716711704546	0.000135550125361571	PPP3CA/ESR1/TP53	3
BP	GO:1903798	regulation of production of miRNAs involved in gene silencing by miRNA	3/71	19/18670	4.88850018143596e-05	0.000320716711704546	0.000135550125361571	PPP3CA/ESR1/TP53	3
BP	GO:0033138	positive regulation of peptidyl-serine phosphorylation	5/71	105/18670	4.95675104610557e-05	0.000324549175637865	0.000137169906768795	IL6/PTGS2/BCL2/AKT1/IFNG	5
BP	GO:0003018	vascular process in circulatory system	6/71	173/18670	5.04893321860413e-05	0.000329930289532547	0.000139444221253788	PTGS2/ADRB2/AKT1/HMOX1/ICAM1/SOD1	6
BP	GO:0052547	regulation of peptidase activity	9/71	452/18670	5.19790461661782e-05	0.000338993779344641	0.000143274882817113	PTGS2/BAX/AKT1/MAPK14/MYC/SERPINE1/CYCS/MDM2/BAD	9
BP	GO:0002763	positive regulation of myeloid leukocyte differentiation	4/71	54/18670	5.25995819719687e-05	0.000341018900800583	0.000144130795394186	RB1/IFNG/CA2/CREB1	4
BP	GO:0010524	positive regulation of calcium ion transport into cytosol	4/71	54/18670	5.25995819719687e-05	0.000341018900800583	0.000144130795394186	BAX/F2/CALM1/CXCL10	4
BP	GO:0032655	regulation of interleukin-12 production	4/71	54/18670	5.25995819719687e-05	0.000341018900800583	0.000144130795394186	RELA/MAPK14/IFNG/CD40LG	4
BP	GO:0033673	negative regulation of kinase activity	7/71	257/18670	5.41854515268826e-05	0.000350611745173946	0.00014818518735422	CASP3/AKT1/PTPN1/CDKN1A/RB1/IL1B/IFNG	7
BP	GO:0042306	regulation of protein import into nucleus	4/71	55/18670	5.65627852121119e-05	0.000365278260665302	0.000154383953869705	PTGS2/MAPK14/MAPK1/IFNG	4
BP	GO:0090257	regulation of muscle system process	7/71	259/18670	5.69010983751501e-05	0.000366745360621085	0.000155004020039214	PTGS2/ADRB2/CALM1/PPP3CA/SOD1/PARP1/ABAT	7
BP	GO:0060261	positive regulation of transcription initiation from RNA polymerase II promoter	3/71	20/18670	5.73549935587761e-05	0.000368950250962887	0.000155935911491492	ESR1/TP53/CREB1	3
BP	GO:0002697	regulation of immune effector process	9/71	458/18670	5.75410701410101e-05	0.000369427104018158	0.000156137452256478	IL6/F2/HMOX1/MAPK14/IL1B/IL2/IFNG/CD40LG/IL4R	9
BP	GO:0006959	humoral immune response	8/71	356/18670	6.0366531557776e-05	0.000386814668234293	0.000163486263288816	IL6/BCL2/F2/IL1B/CCL2/CXCL8/IFNG/CXCL10	8
BP	GO:0032615	interleukin-12 production	4/71	56/18670	6.07395472871541e-05	0.00038845059311552	0.000164177682895714	RELA/MAPK14/IFNG/CD40LG	4
BP	GO:1903034	regulation of response to wounding	6/71	179/18670	6.10331819403813e-05	0.000388821429349919	0.000164334415913443	F2/CDKN1A/SERPINE1/NFE2L2/SPP1/ABAT	6
BP	GO:2001235	positive regulation of apoptotic signaling pathway	6/71	179/18670	6.10331819403813e-05	0.000388821429349919	0.000164334415913443	BCL2/BAX/MAPK8/TP53/SOD1/BAD	6
BP	GO:0002683	negative regulation of immune system process	9/71	463/18670	6.25527798471947e-05	0.000397734438334764	0.000168101477127133	CD14/CASP3/AKT1/HMOX1/MYC/CCL2/IL2/NFE2L2/IL4R	9
BP	GO:0071346	cellular response to interferon-gamma	6/71	180/18670	6.29499407959454e-05	0.000399490008897346	0.000168843464685481	NOS2/ICAM1/VCAM1/TP53/CCL2/IFNG	6
BP	GO:0003012	muscle system process	9/71	465/18670	6.465819136226e-05	0.000409543246632357	0.000173092440761682	PTGS2/ADRB2/CALM1/HMOX1/PPP3CA/SOD1/IL1B/PARP1/ABAT	9
BP	GO:0042743	hydrogen peroxide metabolic process	4/71	57/18670	6.5136844865489e-05	0.000410997300298496	0.000173706992949125	CYP1A1/MAOB/SOD1/MPO	4
BP	GO:0043525	positive regulation of neuron apoptotic process	4/71	57/18670	6.5136844865489e-05	0.000410997300298496	0.000173706992949125	BAX/CASP3/TP53/NQO1	4
BP	GO:0017000	antibiotic biosynthetic process	3/71	21/18670	6.67317815596549e-05	0.000416720485139098	0.000176125882873782	CYP1A1/MAOB/SOD1	3
BP	GO:0046827	positive regulation of protein export from nucleus	3/71	21/18670	6.67317815596549e-05	0.000416720485139098	0.000176125882873782	TP53/IL1B/MDM2	3
BP	GO:0070920	regulation of production of small RNA involved in gene silencing by RNA	3/71	21/18670	6.67317815596549e-05	0.000416720485139098	0.000176125882873782	PPP3CA/ESR1/TP53	3
BP	GO:0071498	cellular response to fluid shear stress	3/71	21/18670	6.67317815596549e-05	0.000416720485139098	0.000176125882873782	PTGS2/NFE2L2/CA2	3
BP	GO:1901739	regulation of myoblast fusion	3/71	21/18670	6.67317815596549e-05	0.000416720485139098	0.000176125882873782	MAPK14/CXCL10/IL4R	3
BP	GO:0043254	regulation of protein complex assembly	9/71	467/18670	6.68231382933114e-05	0.000416720485139098	0.000176125882873782	BAX/MMP1/ICAM1/ESR1/RB1/TP53/IFNG/PARP1/CREB1	9
BP	GO:0010821	regulation of mitochondrion organization	6/71	182/18670	6.6927835492037e-05	0.000416720485139098	0.000176125882873782	BCL2/BAX/AKT1/MAPK8/TP53/BAD	6
BP	GO:0014902	myotube differentiation	5/71	112/18670	6.74632334289147e-05	0.000418474944201915	0.000176867400659501	BCL2/PPP3CA/MAPK14/CXCL10/IL4R	5
BP	GO:0032411	positive regulation of transporter activity	5/71	112/18670	6.74632334289147e-05	0.000418474944201915	0.000176867400659501	ADRB2/PON1/CALM1/CCL2/IFNG	5
BP	GO:0018108	peptidyl-tyrosine phosphorylation	8/71	363/18670	6.91769677859385e-05	0.00042830017578536	0.000181020010499395	IL6/ICAM1/PTPN1/TP53/IL2/IFNG/IGF2/ERBB3	8
BP	GO:0030520	intracellular estrogen receptor signaling pathway	4/71	58/18670	6.97617287186741e-05	0.000429503180544076	0.000181528457486731	AR/ESR1/ESR2/PARP1	4
BP	GO:1903749	positive regulation of establishment of protein localization to mitochondrion	4/71	58/18670	6.97617287186741e-05	0.000429503180544076	0.000181528457486731	BCL2/MAPK8/TP53/BAD	4
BP	GO:1904589	regulation of protein import	4/71	58/18670	6.97617287186741e-05	0.000429503180544076	0.000181528457486731	PTGS2/MAPK14/MAPK1/IFNG	4
BP	GO:0048639	positive regulation of developmental growth	6/71	184/18670	7.11041184799295e-05	0.000436952683396215	0.000184676971451351	BCL2/AKT1/MAPK14/MAPK1/IGF2/CREB1	6
BP	GO:0018212	peptidyl-tyrosine modification	8/71	366/18670	7.32675576167384e-05	0.000449410669396351	0.000189942308437054	IL6/ICAM1/PTPN1/TP53/IL2/IFNG/IGF2/ERBB3	8
BP	GO:0007548	sex differentiation	7/71	270/18670	7.39074433412427e-05	0.000452494551068833	0.000191245703402298	BCL2/BAX/CASP3/AR/ICAM1/ESR1/SOD1	7
BP	GO:0031281	positive regulation of cyclase activity	3/71	22/18670	7.70578102016051e-05	0.000469171169124164	0.000198294034797294	NOS2/MAPK8/MAPK14	3
BP	GO:0048305	immunoglobulin secretion	3/71	22/18670	7.70578102016051e-05	0.000469171169124164	0.000198294034797294	IL6/IL2/CD40LG	3
BP	GO:1901522	positive regulation of transcription from RNA polymerase II promoter involved in cellular response to chemical stimulus	3/71	22/18670	7.70578102016051e-05	0.000469171169124164	0.000198294034797294	RELA/TP53/NFE2L2	3
BP	GO:0032868	response to insulin	7/71	272/18670	7.74051111020512e-05	0.000470417802277659	0.00019882092121783	RELA/AKT1/ICAM1/PTPN1/IL1B/PARP1/IGF2	7
BP	GO:0021782	glial cell development	5/71	116/18670	7.97145086828281e-05	0.000482725325501795	0.000204022665483215	IL6/AKT1/SOD1/IL1B/IFNG	5
BP	GO:0002294	CD4-positive, alpha-beta T cell differentiation involved in immune response	4/71	60/18670	7.97228189086297e-05	0.000482725325501795	0.000204022665483215	IL6/IL2/IFNG/IL4R	4
BP	GO:0002761	regulation of myeloid leukocyte differentiation	5/71	117/18670	8.30289630390983e-05	0.000499991930709898	0.00021132035348983	RB1/MYC/IFNG/CA2/CREB1	5
BP	GO:0010822	positive regulation of mitochondrion organization	5/71	117/18670	8.30289630390983e-05	0.000499991930709898	0.00021132035348983	BCL2/BAX/MAPK8/TP53/BAD	5
BP	GO:0010906	regulation of glucose metabolic process	5/71	117/18670	8.30289630390983e-05	0.000499991930709898	0.00021132035348983	AKT1/TP53/IGFBP3/IGF2/BAD	5
BP	GO:0002287	alpha-beta T cell activation involved in immune response	4/71	61/18670	8.50734824475413e-05	0.000509514504676745	0.000215345045836264	IL6/IL2/IFNG/IL4R	4
BP	GO:0002293	alpha-beta T cell differentiation involved in immune response	4/71	61/18670	8.50734824475413e-05	0.000509514504676745	0.000215345045836264	IL6/IL2/IFNG/IL4R	4
BP	GO:0045123	cellular extravasation	4/71	61/18670	8.50734824475413e-05	0.000509514504676745	0.000215345045836264	ICAM1/SELE/VCAM1/CCL2	4
BP	GO:0042594	response to starvation	6/71	191/18670	8.73887801621456e-05	0.000522432924882392	0.000220804984200692	BCL2/MAPK8/CDKN1A/MAPK1/TP53/NFE2L2	6
BP	GO:0060485	mesenchyme development	7/71	278/18670	8.8718800966403e-05	0.000529425032891736	0.000223760181365726	IL6/BCL2/MAPK1/MYC/IL1B/ERBB3/MDM2	7
BP	GO:0010830	regulation of myotube differentiation	4/71	62/18670	9.06806434279054e-05	0.000535324013080658	0.000226253370759768	BCL2/MAPK14/CXCL10/IL4R	4
BP	GO:0031640	killing of cells of other organism	4/71	62/18670	9.06806434279054e-05	0.000535324013080658	0.000226253370759768	NOS2/F2/IFNG/BAD	4
BP	GO:0044364	disruption of cells of other organism	4/71	62/18670	9.06806434279054e-05	0.000535324013080658	0.000226253370759768	NOS2/F2/IFNG/BAD	4
BP	GO:0045453	bone resorption	4/71	62/18670	9.06806434279054e-05	0.000535324013080658	0.000226253370759768	IL6/ADRB2/SPP1/CA2	4
BP	GO:0055025	positive regulation of cardiac muscle tissue development	4/71	62/18670	9.06806434279054e-05	0.000535324013080658	0.000226253370759768	MAPK14/MAPK1/ERBB3/CREB1	4
BP	GO:0070059	intrinsic apoptotic signaling pathway in response to endoplasmic reticulum stress	4/71	62/18670	9.06806434279054e-05	0.000535324013080658	0.000226253370759768	BCL2/BAX/PTPN1/TP53	4
BP	GO:0050678	regulation of epithelial cell proliferation	8/71	378/18670	9.17003273846506e-05	0.000540376929230977	0.00022838897327944	BAX/AR/AKT1/HMOX1/RB1/MYC/CCL2/BAD	8
BP	GO:0030522	intracellular receptor signaling pathway	7/71	280/18670	9.27768489113817e-05	0.000545746170066951	0.000230658269645522	AR/RELA/AHR/ESR1/ESR2/RB1/PARP1	7
BP	GO:0002637	regulation of immunoglobulin production	4/71	63/18670	9.65516985670198e-05	0.000566940578774316	0.000239616034091218	IL6/IL2/CD40LG/IL4R	4
BP	GO:0042176	regulation of protein catabolic process	8/71	381/18670	9.68654823977491e-05	0.000567772809791425	0.00023996777447325	NOS2/RELA/AKT1/IL1B/IFNG/NFE2L2/CHEK2/MDM2	8
BP	GO:0030968	endoplasmic reticulum unfolded protein response	5/71	121/18670	9.73608312399743e-05	0.000569664438106232	0.000240767266504229	BAX/PTPN1/CCL2/CXCL8/NFE2L2	5
BP	GO:0009110	vitamin biosynthetic process	3/71	24/18670	0.000100724863376665	0.000587265104492924	0.000248206144642145	CYP3A4/IL1B/IFNG	3
BP	GO:0046697	decidualization	3/71	24/18670	0.000100724863376665	0.000587265104492924	0.000248206144642145	PTGS2/MAPK1/SPP1	3
BP	GO:0032768	regulation of monooxygenase activity	4/71	64/18670	0.000102694108971338	0.000596638309164461	0.000252167706425171	CALM1/AKT1/IL1B/IFNG	4
BP	GO:0045600	positive regulation of fat cell differentiation	4/71	64/18670	0.000102694108971338	0.000596638309164461	0.000252167706425171	PTGS2/AKT1/MAPK14/CREB1	4
BP	GO:0034976	response to endoplasmic reticulum stress	7/71	285/18670	0.000103588414379151	0.000600776392708611	0.000253916657205394	BCL2/BAX/PTPN1/TP53/CCL2/CXCL8/NFE2L2	7
BP	GO:0051928	positive regulation of calcium ion transport	5/71	123/18670	0.000105203648810104	0.000608007077186242	0.000256972688124967	BAX/F2/CALM1/CCL2/CXCL10	5
BP	GO:0071621	granulocyte chemotaxis	5/71	123/18670	0.000105203648810104	0.000608007077186242	0.000256972688124967	MAPK14/IL1B/CCL2/CXCL8/CXCL10	5
BP	GO:0006914	autophagy	9/71	496/18670	0.00010578584637168	0.00060865582702469	0.000257246880640419	ADRB2/BCL2/CASP3/AKT1/MAPK8/HMOX1/TP53/IFNG/BAD	9
BP	GO:0061919	process utilizing autophagic mechanism	9/71	496/18670	0.00010578584637168	0.00060865582702469	0.000257246880640419	ADRB2/BCL2/CASP3/AKT1/MAPK8/HMOX1/TP53/IFNG/BAD	9
BP	GO:0002440	production of molecular mediator of immune response	7/71	286/18670	0.000105869225670355	0.00060865582702469	0.000257246880640419	IL6/HMOX1/MAPK14/IL1B/IL2/CD40LG/IL4R	7
BP	GO:0031099	regeneration	6/71	198/18670	0.000106517599068229	0.000610257077995062	0.000257923645404612	BCL2/HMOX1/PPP3CA/CDKN1A/SPP1/PCNA	6
BP	GO:0046890	regulation of lipid biosynthetic process	6/71	198/18670	0.000106517599068229	0.000610257077995062	0.000257923645404612	PTGS2/AKT1/SOD1/IL1B/IFNG/CREB1	6
BP	GO:0002548	monocyte chemotaxis	4/71	65/18670	0.000109115398573917	0.000620890125384602	0.000262417676597958	IL6/CCL2/SERPINE1/CXCL10	4
BP	GO:0006940	regulation of smooth muscle contraction	4/71	65/18670	0.000109115398573917	0.000620890125384602	0.000262417676597958	PTGS2/ADRB2/SOD1/ABAT	4
BP	GO:0014013	regulation of gliogenesis	5/71	124/18670	0.000109302562729781	0.000620890125384602	0.000262417676597958	IL6/F2/RELA/IL1B/CREB1	5
BP	GO:0051101	regulation of DNA binding	5/71	124/18670	0.000109302562729781	0.000620890125384602	0.000262417676597958	MAPK8/HMOX1/RB1/IFNG/PARP1	5
BP	GO:0034341	response to interferon-gamma	6/71	199/18670	0.000109502440295103	0.000620890125384602	0.000262417676597958	NOS2/ICAM1/VCAM1/TP53/CCL2/IFNG	6
BP	GO:0050866	negative regulation of cell activation	6/71	199/18670	0.000109502440295103	0.000620890125384602	0.000262417676597958	CASP3/F2/HMOX1/IL2/IL4R/ABAT	6
BP	GO:0007162	negative regulation of cell adhesion	7/71	289/18670	0.000112958456479619	0.000639387489507277	0.00027023554181727	CASP3/AKT1/IL2/SERPINE1/ERBB3/IL4R/ABAT	7
BP	GO:0006805	xenobiotic metabolic process	5/71	125/18670	0.000113523034001761	0.000640628125417824	0.0002707598935179	CYP3A4/CYP1A1/AHR/GSTM1/NQO1	5
BP	GO:0032461	positive regulation of protein oligomerization	3/71	25/18670	0.000114148284165358	0.000640628125417824	0.0002707598935179	BAX/MMP1/TP53	3
BP	GO:0045672	positive regulation of osteoclast differentiation	3/71	25/18670	0.000114148284165358	0.000640628125417824	0.0002707598935179	IFNG/CA2/CREB1	3
BP	GO:1904385	cellular response to angiotensin	3/71	25/18670	0.000114148284165358	0.000640628125417824	0.0002707598935179	RELA/NFE2L2/CA2	3
BP	GO:2000679	positive regulation of transcription regulatory region DNA binding	3/71	25/18670	0.000114148284165358	0.000640628125417824	0.0002707598935179	RB1/IFNG/PARP1	3
BP	GO:0046626	regulation of insulin receptor signaling pathway	4/71	66/18670	0.000115823152587684	0.000646728263179961	0.000273338101662982	RELA/PTPN1/IL1B/IGF2	4
BP	GO:0051785	positive regulation of nuclear division	4/71	66/18670	0.000115823152587684	0.000646728263179961	0.000273338101662982	RB1/IL1B/IL1A/IGF2	4
BP	GO:0051926	negative regulation of calcium ion transport	4/71	66/18670	0.000115823152587684	0.000646728263179961	0.000273338101662982	PTGS2/BCL2/CALM1/ICAM1	4
BP	GO:0018107	peptidyl-threonine phosphorylation	5/71	126/18670	0.000117867508166397	0.000657031717819442	0.000277692831295299	BCL2/CALM1/AKT1/MAPK8/MAPK1	5
BP	GO:0035270	endocrine system development	5/71	127/18670	0.000122338454712397	0.000680804216780627	0.000287740219213502	IL6/AKT1/MAPK1/BAD/CREB1	5
BP	GO:0019748	secondary metabolic process	4/71	67/18670	0.000122825015974386	0.000681214374311721	0.000287913571280074	BCL2/CYP1A1/NFE2L2/TYR	4
BP	GO:0048662	negative regulation of smooth muscle cell proliferation	4/71	67/18670	0.000122825015974386	0.000681214374311721	0.000287913571280074	HMOX1/CDKN1A/IFNG/IGFBP3	4
BP	GO:0050768	negative regulation of neurogenesis	7/71	295/18670	0.000128298139831748	0.00070777159984404	0.000299137916999475	IL6/F2/PPP3CA/TP53/IL1B/SPP1/MDM2	7
BP	GO:0002360	T cell lineage commitment	3/71	26/18670	0.000128685745426189	0.00070777159984404	0.000299137916999475	IL6/BCL2/TP53	3
BP	GO:0006309	apoptotic DNA fragmentation	3/71	26/18670	0.000128685745426189	0.00070777159984404	0.000299137916999475	IL6/BAX/CASP3	3
BP	GO:0030194	positive regulation of blood coagulation	3/71	26/18670	0.000128685745426189	0.00070777159984404	0.000299137916999475	F2/SERPINE1/NFE2L2	3
BP	GO:1900048	positive regulation of hemostasis	3/71	26/18670	0.000128685745426189	0.00070777159984404	0.000299137916999475	F2/SERPINE1/NFE2L2	3
BP	GO:0002292	T cell differentiation involved in immune response	4/71	68/18670	0.000130128691929126	0.000713330038814148	0.000301487177489233	IL6/IL2/IFNG/IL4R	4
BP	GO:0035924	cellular response to vascular endothelial growth factor stimulus	4/71	68/18670	0.000130128691929126	0.000713330038814148	0.000301487177489233	RELA/AKT1/VCAM1/MAPK14	4
BP	GO:0006109	regulation of carbohydrate metabolic process	6/71	206/18670	0.000132308927925372	0.000724078710039348	0.000306030076810889	AKT1/TP53/IFNG/IGFBP3/IGF2/BAD	6
BP	GO:0070227	lymphocyte apoptotic process	4/71	69/18670	0.000137741940380356	0.000752563581548303	0.000318069137337002	BAX/AKT1/TP53/IL2	4
BP	GO:0007623	circadian rhythm	6/71	208/18670	0.000139472724337367	0.000760760314567457	0.000321533466284492	NOS2/MAPK8/AHR/TP53/SERPINE1/CREB1	6
BP	GO:0006006	glucose metabolic process	6/71	209/18670	0.000143168185911869	0.000779628735163641	0.000329508157605048	AKT1/MAPK14/TP53/IGFBP3/IGF2/BAD	6
BP	GO:0045932	negative regulation of muscle contraction	3/71	27/18670	0.000144377220990069	0.000781057097159389	0.000330111851271512	PTGS2/ADRB2/SOD1	3
BP	GO:0048143	astrocyte activation	3/71	27/18670	0.000144377220990069	0.000781057097159389	0.000330111851271512	IL6/IL1B/IFNG	3
BP	GO:0050820	positive regulation of coagulation	3/71	27/18670	0.000144377220990069	0.000781057097159389	0.000330111851271512	F2/SERPINE1/NFE2L2	3
BP	GO:2000144	positive regulation of DNA-templated transcription, initiation	3/71	27/18670	0.000144377220990069	0.000781057097159389	0.000330111851271512	ESR1/TP53/CREB1	3
BP	GO:0050766	positive regulation of phagocytosis	4/71	70/18670	0.000145672576505215	0.000785489383116355	0.000331985145974217	SOD1/IL1B/CCL2/IFNG	4
BP	GO:2001259	positive regulation of cation channel activity	4/71	70/18670	0.000145672576505215	0.000785489383116355	0.000331985145974217	ADRB2/CALM1/CCL2/IFNG	4
BP	GO:0030518	intracellular steroid hormone receptor signaling pathway	5/71	132/18670	0.000146678367817606	0.000788336504557165	0.000333188474812837	AR/ESR1/ESR2/RB1/PARP1	5
BP	GO:0045598	regulation of fat cell differentiation	5/71	132/18670	0.000146678367817606	0.000788336504557165	0.000333188474812837	IL6/PTGS2/AKT1/MAPK14/CREB1	5
BP	GO:0050707	regulation of cytokine secretion	6/71	210/18670	0.000146940892132249	0.000788463323636457	0.000333242074583191	CD14/MAPK14/IL1B/IFNG/IL1A/IL4R	6
BP	GO:1904427	positive regulation of calcium ion transmembrane transport	4/71	71/18670	0.000153928469260103	0.000824616799607694	0.000348522251827813	BAX/F2/CALM1/CXCL10	4
BP	GO:0006766	vitamin metabolic process	5/71	134/18670	0.00015738872232688	0.000837714167223718	0.000354057821872863	PRSS1/CYP3A4/CYP1A1/IL1B/IFNG	5
BP	GO:0007006	mitochondrial membrane organization	5/71	134/18670	0.00015738872232688	0.000837714167223718	0.000354057821872863	BCL2/BAX/MAPK8/TP53/BAD	5
BP	GO:0018210	peptidyl-threonine modification	5/71	134/18670	0.00015738872232688	0.000837714167223718	0.000354057821872863	BCL2/CALM1/AKT1/MAPK8/MAPK1	5
BP	GO:0048565	digestive tract development	5/71	134/18670	0.00015738872232688	0.000837714167223718	0.000354057821872863	BCL2/CYP1A1/CDKN1A/RB1/CXCL8	5
BP	GO:0008209	androgen metabolic process	3/71	28/18670	0.000161262201480708	0.000851464423818137	0.000359869333830632	CYP3A4/ESR1/SPP1	3
BP	GO:0032770	positive regulation of monooxygenase activity	3/71	28/18670	0.000161262201480708	0.000851464423818137	0.000359869333830632	AKT1/IL1B/IFNG	3
BP	GO:0033598	mammary gland epithelial cell proliferation	3/71	28/18670	0.000161262201480708	0.000851464423818137	0.000359869333830632	BAX/ESR1/MAPK1	3
BP	GO:0051123	RNA polymerase II preinitiation complex assembly	3/71	28/18670	0.000161262201480708	0.000851464423818137	0.000359869333830632	ESR1/TP53/CREB1	3
BP	GO:0060260	regulation of transcription initiation from RNA polymerase II promoter	3/71	28/18670	0.000161262201480708	0.000851464423818137	0.000359869333830632	ESR1/TP53/CREB1	3
BP	GO:1903747	regulation of establishment of protein localization to mitochondrion	4/71	72/18670	0.000162517539926366	0.000856721855841864	0.000362091374478619	BCL2/MAPK8/TP53/BAD	4
BP	GO:0050921	positive regulation of chemotaxis	5/71	135/18670	0.00016296318651634	0.000857700981664948	0.000362505199587259	IL6/MAPK14/CXCL8/SERPINE1/CXCL10	5
BP	GO:0032869	cellular response to insulin stimulus	6/71	216/18670	0.000171265178888814	0.000899960334925296	0.000380366010773849	RELA/AKT1/PTPN1/IL1B/PARP1/IGF2	6
BP	GO:0046425	regulation of JAK-STAT cascade	5/71	137/18670	0.000174564088004919	0.000915837027688762	0.000387076255721726	IL6/F2/IL10RB/IL2/IFNG	5
BP	GO:0050920	regulation of chemotaxis	6/71	217/18670	0.000175611765231852	0.000919871151214464	0.00038878126805715	IL6/MAPK14/CCL2/CXCL8/SERPINE1/CXCL10	6
BP	GO:0030099	myeloid cell differentiation	8/71	416/18670	0.000177196865826157	0.000926703101784974	0.000391668775076584	CASP3/MAPK14/RB1/MYC/IFNG/PARP1/CA2/CREB1	8
BP	GO:0060142	regulation of syncytium formation by plasma membrane fusion	3/71	29/18670	0.00017937969789849	0.000934795619597538	0.000395089057724637	MAPK14/CXCL10/IL4R	3
BP	GO:0019722	calcium-mediated signaling	6/71	218/18670	0.000180045193615344	0.000934795619597538	0.000395089057724637	CALM1/SELE/VCAM1/PPP3CA/CXCL8/ERBB3	6
BP	GO:0008584	male gonad development	5/71	138/18670	0.000180595953208844	0.000934795619597538	0.000395089057724637	BCL2/BAX/AR/ICAM1/ESR1	5
BP	GO:0046631	alpha-beta T cell activation	5/71	138/18670	0.000180595953208844	0.000934795619597538	0.000395089057724637	IL6/BCL2/IL2/IFNG/IL4R	5
BP	GO:0031670	cellular response to nutrient	4/71	74/18670	0.000180727153122191	0.000934795619597538	0.000395089057724637	PTGS2/HMOX1/SOD1/MDM2	4
BP	GO:0043367	CD4-positive, alpha-beta T cell differentiation	4/71	74/18670	0.000180727153122191	0.000934795619597538	0.000395089057724637	IL6/IL2/IFNG/IL4R	4
BP	GO:1900076	regulation of cellular response to insulin stimulus	4/71	74/18670	0.000180727153122191	0.000934795619597538	0.000395089057724637	RELA/PTPN1/IL1B/IGF2	4
BP	GO:0045580	regulation of T cell differentiation	5/71	139/18670	0.00018678575091015	0.000963114028130463	0.000407057763085443	SOD1/IL2/IFNG/IL4R/BAD	5
BP	GO:0046546	development of primary male sexual characteristics	5/71	139/18670	0.00018678575091015	0.000963114028130463	0.000407057763085443	BCL2/BAX/AR/ICAM1/ESR1	5
BP	GO:0007422	peripheral nervous system development	4/71	75/18670	0.000190363786959766	0.000976983665578894	0.00041291973106604	RELA/AKT1/SOD1/ERBB3	4
BP	GO:0150076	neuroinflammatory response	4/71	75/18670	0.000190363786959766	0.000976983665578894	0.00041291973106604	IL6/PTGS2/IL1B/IFNG	4
BP	GO:1903201	regulation of oxidative stress-induced cell death	4/71	75/18670	0.000190363786959766	0.000976983665578894	0.00041291973106604	AKT1/SOD1/NFE2L2/PARP1	4
BP	GO:0051961	negative regulation of nervous system development	7/71	315/18670	0.000192119428209049	0.000984462908524628	0.000416080814607698	IL6/F2/PPP3CA/TP53/IL1B/SPP1/MDM2	7
BP	GO:0034620	cellular response to unfolded protein	5/71	140/18670	0.000193136251242166	0.000986609332970815	0.000416987995593725	BAX/PTPN1/CCL2/CXCL8/NFE2L2	5
BP	GO:0042737	drug catabolic process	5/71	140/18670	0.000193136251242166	0.000986609332970815	0.000416987995593725	ACHE/CYP3A4/MAOB/MAOA/MPO	5
BP	GO:0001782	B cell homeostasis	3/71	30/18670	0.000198768245182864	0.00100913109092839	0.000426506760918697	BCL2/BAX/CASP3	3
BP	GO:0042759	long-chain fatty acid biosynthetic process	3/71	30/18670	0.000198768245182864	0.00100913109092839	0.000426506760918697	PTGS2/CYP3A4/CYP1A1	3
BP	GO:0048147	negative regulation of fibroblast proliferation	3/71	30/18670	0.000198768245182864	0.00100913109092839	0.000426506760918697	BAX/TP53/MYC	3
BP	GO:0090200	positive regulation of release of cytochrome c from mitochondria	3/71	30/18670	0.000198768245182864	0.00100913109092839	0.000426506760918697	BAX/TP53/BAD	3
BP	GO:0008286	insulin receptor signaling pathway	5/71	141/18670	0.000199650246567013	0.00101049971421955	0.000427085206169346	RELA/AKT1/PTPN1/IL1B/IGF2	5
BP	GO:0097530	granulocyte migration	5/71	141/18670	0.000199650246567013	0.00101049971421955	0.000427085206169346	MAPK14/IL1B/CCL2/CXCL8/CXCL10	5
BP	GO:0061045	negative regulation of wound healing	4/71	76/18670	0.000200365778520143	0.00101256825285831	0.000427959468911405	F2/CDKN1A/SERPINE1/ABAT	4
BP	GO:0045444	fat cell differentiation	6/71	223/18670	0.000203558893643734	0.00102713203214728	0.000434114814224927	IL6/PTGS2/ADRB2/AKT1/MAPK14/CREB1	6
BP	GO:0052548	regulation of endopeptidase activity	8/71	425/18670	0.000204963051475276	0.00103263827460826	0.000436442013989137	PTGS2/BAX/AKT1/MYC/SERPINE1/CYCS/MDM2/BAD	8
BP	GO:0010675	regulation of cellular carbohydrate metabolic process	5/71	142/18670	0.000206330551337345	0.00103636349986794	0.000438016471236053	AKT1/TP53/IGFBP3/IGF2/BAD	5
BP	GO:0050871	positive regulation of B cell activation	5/71	142/18670	0.000206330551337345	0.00103636349986794	0.000438016471236053	IL6/BCL2/CDKN1A/IL2/BAD	5
BP	GO:0007204	positive regulation of cytosolic calcium ion concentration	7/71	319/18670	0.000207533857435565	0.00104082329716925	0.000439901393540431	BCL2/BAX/F2/CALM1/ESR1/IL2/CXCL10	7
BP	GO:0048678	response to axon injury	4/71	77/18670	0.000210741289415963	0.00105530539464746	0.000446022216238562	BCL2/BAX/SOD1/SPP1	4
BP	GO:0001649	osteoblast differentiation	6/71	225/18670	0.000213616617709193	0.00106808308854596	0.000451422676977161	IL6/ACHE/AKT1/SPP1/IGFBP3/IGF2	6
BP	GO:0002675	positive regulation of acute inflammatory response	3/71	31/18670	0.000219465905753378	0.00108907893080623	0.000460296517804868	IL6/PTGS2/IL1B	3
BP	GO:0010165	response to X-ray	3/71	31/18670	0.000219465905753378	0.00108907893080623	0.000460296517804868	CASP3/CDKN1A/TP53	3
BP	GO:0033198	response to ATP	3/71	31/18670	0.000219465905753378	0.00108907893080623	0.000460296517804868	PTGS2/SOD1/IL1B	3
BP	GO:0040018	positive regulation of multicellular organism growth	3/71	31/18670	0.000219465905753378	0.00108907893080623	0.000460296517804868	BCL2/IGF2/CREB1	3
BP	GO:1902253	regulation of intrinsic apoptotic signaling pathway by p53 class mediator	3/71	31/18670	0.000219465905753378	0.00108907893080623	0.000460296517804868	BCL2/TP53/MDM2	3
BP	GO:0010827	regulation of glucose transmembrane transport	4/71	78/18670	0.000221498525170126	0.00109586976470977	0.000463166646966649	AKT1/MAPK14/IL1B/NFE2L2	4
BP	GO:0031016	pancreas development	4/71	78/18670	0.000221498525170126	0.00109586976470977	0.000463166646966649	IL6/AKT1/IGF2/BAD	4
BP	GO:0030193	regulation of blood coagulation	4/71	79/18670	0.000232645733864172	0.00114757985314166	0.000485021788010429	F2/SERPINE1/NFE2L2/ABAT	4
BP	GO:0043536	positive regulation of blood vessel endothelial cell migration	4/71	79/18670	0.000232645733864172	0.00114757985314166	0.000485021788010429	PTGS2/AKT1/HMOX1/NFE2L2	4
BP	GO:1904892	regulation of STAT cascade	5/71	146/18670	0.000234771919196742	0.00115633930350634	0.00048872394805292	IL6/F2/IL10RB/IL2/IFNG	5
BP	GO:0051188	cofactor biosynthetic process	7/71	326/18670	0.000236908382359235	0.00116512319193066	0.000492436436780902	PTGS2/CYP1A1/MAOB/TP53/SOD1/IFNG/NFE2L2	7
BP	GO:0009743	response to carbohydrate	6/71	230/18670	0.000240483259274929	0.00117897026774733	0.00049828886914361	PTGS2/CASP3/ICAM1/PPP3CA/IL1B/BAD	6
BP	GO:0001975	response to amphetamine	3/71	32/18670	0.000241510273029454	0.00117897026774733	0.00049828886914361	ICAM1/PPP3CA/SOD1	3
BP	GO:0045907	positive regulation of vasoconstriction	3/71	32/18670	0.000241510273029454	0.00117897026774733	0.00049828886914361	PTGS2/AKT1/ICAM1	3
BP	GO:0046685	response to arsenic-containing substance	3/71	32/18670	0.000241510273029454	0.00117897026774733	0.00049828886914361	HMOX1/CYP1A1/CDKN1A	3
BP	GO:0051385	response to mineralocorticoid	3/71	32/18670	0.000241510273029454	0.00117897026774733	0.00049828886914361	MAOB/CDKN1A/PARP1	3
BP	GO:1900046	regulation of hemostasis	4/71	80/18670	0.000244191204800895	0.00119029686239727	0.000503076026372054	F2/SERPINE1/NFE2L2/ABAT	4
BP	GO:0016485	protein processing	7/71	328/18670	0.000245890449654361	0.00119681192309645	0.000505829600670746	CASP3/F2/IL1B/SERPINE1/PARP1/MDM2/BAD	7
BP	GO:0061041	regulation of wound healing	5/71	148/18670	0.00025006523537816	0.00121533914101315	0.000513660083522304	F2/CDKN1A/SERPINE1/NFE2L2/ABAT	5
BP	GO:0051235	maintenance of location	7/71	330/18670	0.000255145442918461	0.00123820582592783	0.000523324631373005	IL6/BAX/F2/CALM1/AKT1/IL1B/CXCL10	7
BP	GO:0051092	positive regulation of NF-kappaB transcription factor activity	5/71	149/18670	0.000257990336667122	0.00125017343759398	0.000528382712858701	AR/RELA/ICAM1/IL1B/CD40LG	5
BP	GO:0016242	negative regulation of macroautophagy	3/71	33/18670	0.000264938474929041	0.00128008340741704	0.000541024087664297	AKT1/HMOX1/TP53	3
BP	GO:2000352	negative regulation of endothelial cell apoptotic process	3/71	33/18670	0.000264938474929041	0.00128008340741704	0.000541024087664297	ICAM1/SERPINE1/NFE2L2	3
BP	GO:0032637	interleukin-8 production	4/71	82/18670	0.000268510288794278	0.00129355321608922	0.000546717069001028	CD14/NOS2/IL1B/SERPINE1	4
BP	GO:0051279	regulation of release of sequestered calcium ion into cytosol	4/71	82/18670	0.000268510288794278	0.00129355321608922	0.000546717069001028	BAX/F2/CALM1/CXCL10	4
BP	GO:0030336	negative regulation of cell migration	7/71	334/18670	0.000274498820082272	0.00132047537357361	0.000558095652307827	BCL2/AKT1/HMOX1/CCL2/SERPINE1/NFE2L2/IGFBP3	7
BP	GO:0045582	positive regulation of T cell differentiation	4/71	83/18670	0.000281300674723427	0.00134926195724899	0.000570262230735221	IL2/IFNG/IL4R/BAD	4
BP	GO:0045913	positive regulation of carbohydrate metabolic process	4/71	83/18670	0.000281300674723427	0.00134926195724899	0.000570262230735221	AKT1/IFNG/IGF2/BAD	4
BP	GO:0032872	regulation of stress-activated MAPK cascade	6/71	237/18670	0.000282496278968362	0.00135303007343338	0.00057185481572543	AKT1/PTPN1/MAPK1/MYC/IL1B/CD40LG	6
BP	GO:0016202	regulation of striated muscle tissue development	5/71	152/18670	0.000282915306975357	0.00135307320727344	0.000571873046136304	BCL2/MAPK14/MAPK1/ERBB3/CREB1	5
BP	GO:0007596	blood coagulation	7/71	336/18670	0.000284609719221397	0.00135920705272158	0.000574465500751544	IL6/F2/MAPK1/SERPINE1/NFE2L2/CD40LG/ABAT	7
BP	GO:0051048	negative regulation of secretion	6/71	238/18670	0.000288941341690358	0.00137596789243534	0.000581549428222273	HMOX1/PPP3CA/MAOB/IL1B/ERBB3/ABAT	6
BP	GO:0000737	DNA catabolic process, endonucleolytic	3/71	34/18670	0.000289787177346231	0.00137596789243534	0.000581549428222273	IL6/BAX/CASP3	3
BP	GO:0032660	regulation of interleukin-17 production	3/71	34/18670	0.000289787177346231	0.00137596789243534	0.000581549428222273	IL6/IL2/IFNG	3
BP	GO:0043276	anoikis	3/71	34/18670	0.000289787177346231	0.00137596789243534	0.000581549428222273	BCL2/AKT1/CHEK2	3
BP	GO:0030168	platelet activation	5/71	153/18670	0.000291616943611961	0.00137870474773563	0.00058270615334919	IL6/F2/MAPK1/CD40LG/ABAT	5
BP	GO:0034250	positive regulation of cellular amide metabolic process	5/71	153/18670	0.000291616943611961	0.00137870474773563	0.00058270615334919	IL6/CASP3/MAPK1/IFNG/NFE2L2	5
BP	GO:0050729	positive regulation of inflammatory response	5/71	153/18670	0.000291616943611961	0.00137870474773563	0.00058270615334919	IL6/PTGS2/IL1B/IL2/SERPINE1	5
BP	GO:0002718	regulation of cytokine production involved in immune response	4/71	84/18670	0.000294522866063376	0.00138450919944322	0.00058515939051428	IL6/HMOX1/MAPK14/IL1B	4
BP	GO:0010507	negative regulation of autophagy	4/71	84/18670	0.000294522866063376	0.00138450919944322	0.00058515939051428	BCL2/AKT1/HMOX1/TP53	4
BP	GO:0045445	myoblast differentiation	4/71	84/18670	0.000294522866063376	0.00138450919944322	0.00058515939051428	MAPK14/RB1/CXCL10/IGFBP3	4
BP	GO:0050818	regulation of coagulation	4/71	84/18670	0.000294522866063376	0.00138450919944322	0.00058515939051428	F2/SERPINE1/NFE2L2/ABAT	4
BP	GO:0070302	regulation of stress-activated protein kinase signaling cascade	6/71	239/18670	0.000295501494389327	0.00138713361519883	0.000586268593345599	AKT1/PTPN1/MAPK1/MYC/IL1B/CD40LG	6
BP	GO:1904705	regulation of vascular smooth muscle cell proliferation	4/71	85/18670	0.000308185338653032	0.00144256967029079	0.000609698504987336	HMOX1/CDKN1A/MMP2/MDM2	4
BP	GO:1990874	vascular smooth muscle cell proliferation	4/71	85/18670	0.000308185338653032	0.00144256967029079	0.000609698504987336	HMOX1/CDKN1A/MMP2/MDM2	4
BP	GO:1901861	regulation of muscle tissue development	5/71	155/18670	0.000309628564693333	0.00144727232788668	0.00061168607159485	BCL2/MAPK14/MAPK1/ERBB3/CREB1	5
BP	GO:0007599	hemostasis	7/71	341/18670	0.000311204697107077	0.00145258203741634	0.000613930207201485	IL6/F2/MAPK1/SERPINE1/NFE2L2/CD40LG/ABAT	7
BP	GO:0030262	apoptotic nuclear changes	3/71	35/18670	0.000316092587607956	0.00147017603206112	0.000621366265544175	IL6/BAX/CASP3	3
BP	GO:0060251	regulation of glial cell proliferation	3/71	35/18670	0.000316092587607956	0.00147017603206112	0.000621366265544175	IL6/IL1B/CREB1	3
BP	GO:0050817	coagulation	7/71	342/18670	0.000316756108725897	0.00147017603206112	0.000621366265544175	IL6/F2/MAPK1/SERPINE1/NFE2L2/CD40LG/ABAT	7
BP	GO:1904062	regulation of cation transmembrane transport	7/71	342/18670	0.000316756108725897	0.00147017603206112	0.000621366265544175	ADRB2/BAX/F2/CALM1/CCL2/IFNG/CXCL10	7
BP	GO:0048634	regulation of muscle organ development	5/71	156/18670	0.00031894474562016	0.00147825514121704	0.000624780881056642	BCL2/MAPK14/MAPK1/ERBB3/CREB1	5
BP	GO:0072330	monocarboxylic acid biosynthetic process	7/71	343/18670	0.000322386921419734	0.00149211338104505	0.000630638031861147	PTGS2/CYP3A4/CYP1A1/TP53/IL1B/IFNG/ABAT	7
BP	GO:1905952	regulation of lipid localization	5/71	157/18670	0.000328472004257702	0.00151814791883812	0.000641641464899683	IL6/PON1/AKT1/IL1B/SPP1	5
BP	GO:0006112	energy reserve metabolic process	4/71	87/18670	0.00033686519714553	0.00155476244836398	0.000657116505289403	CALM1/AKT1/MYC/IGF2	4
BP	GO:0043467	regulation of generation of precursor metabolites and energy	5/71	158/18670	0.000338213488300046	0.00155663111769896	0.000657906293764312	NOS2/AKT1/TP53/IFNG/IGF2	5
BP	GO:0060402	calcium ion transport into cytosol	5/71	158/18670	0.000338213488300046	0.00155663111769896	0.000657906293764312	BCL2/BAX/F2/CALM1/CXCL10	5
BP	GO:0046627	negative regulation of insulin receptor signaling pathway	3/71	36/18670	0.000343890457909898	0.0015805550293909	0.000668017675898864	RELA/PTPN1/IL1B	3
BP	GO:0050829	defense response to Gram-negative bacterium	4/71	88/18670	0.000351899697225801	0.00161287361228492	0.000681677045064601	IL6/NOS2/F2/SERPINE1	4
BP	GO:1900407	regulation of cellular response to oxidative stress	4/71	88/18670	0.000351899697225801	0.00161287361228492	0.000681677045064601	AKT1/SOD1/NFE2L2/PARP1	4
BP	GO:2000146	negative regulation of cell motility	7/71	349/18670	0.000357886473694699	0.00163789613310718	0.000692252751632219	BCL2/AKT1/HMOX1/CCL2/SERPINE1/NFE2L2/IGFBP3	7
BP	GO:0046661	male sex differentiation	5/71	160/18670	0.000358351820637388	0.00163789613310718	0.000692252751632219	BCL2/BAX/AR/ICAM1/ESR1	5
BP	GO:0019318	hexose metabolic process	6/71	249/18670	0.000367757783611522	0.00167624404132324	0.000708460400240283	AKT1/MAPK14/TP53/IGFBP3/IGF2/BAD	6
BP	GO:0045926	negative regulation of growth	6/71	249/18670	0.000367757783611522	0.00167624404132324	0.000708460400240283	ADRB2/BCL2/ESR2/CDKN1A/TP53/SPP1	6
BP	GO:0035967	cellular response to topologically incorrect protein	5/71	161/18670	0.000368755061082561	0.00167847131251373	0.000709401750902931	BAX/PTPN1/CCL2/CXCL8/NFE2L2	5
BP	GO:0006921	cellular component disassembly involved in execution phase of apoptosis	3/71	37/18670	0.00037321608873169	0.00168714122303367	0.00071306606715139	IL6/BAX/CASP3	3
BP	GO:0014912	negative regulation of smooth muscle cell migration	3/71	37/18670	0.00037321608873169	0.00168714122303367	0.00071306606715139	SERPINE1/NFE2L2/IGFBP3	3
BP	GO:0046006	regulation of activated T cell proliferation	3/71	37/18670	0.00037321608873169	0.00168714122303367	0.00071306606715139	CASP3/IL2/IGF2	3
BP	GO:2000142	regulation of DNA-templated transcription, initiation	3/71	37/18670	0.00037321608873169	0.00168714122303367	0.00071306606715139	ESR1/TP53/CREB1	3
BP	GO:2000273	positive regulation of signaling receptor activity	3/71	37/18670	0.00037321608873169	0.00168714122303367	0.00071306606715139	ADRB2/CCL2/IFNG	3
BP	GO:0071383	cellular response to steroid hormone stimulus	6/71	250/18670	0.000375682066964317	0.00169596555537927	0.000716795649402722	AR/ICAM1/ESR1/ESR2/RB1/PARP1	6
BP	GO:0046849	bone remodeling	4/71	90/18670	0.00038340084988994	0.00172761319393931	0.000730171445604332	IL6/ADRB2/SPP1/CA2	4
BP	GO:0045637	regulation of myeloid cell differentiation	6/71	251/18670	0.000383739536714397	0.00172761319393931	0.000730171445604332	MAPK14/RB1/MYC/IFNG/CA2/CREB1	6
BP	GO:0060333	interferon-gamma-mediated signaling pathway	4/71	91/18670	0.000399884791921054	0.00179239824780117	0.000757552688464609	ICAM1/VCAM1/TP53/IFNG	4
BP	GO:1901992	positive regulation of mitotic cell cycle phase transition	4/71	91/18670	0.000399884791921054	0.00179239824780117	0.000757552688464609	AKT1/CYP1A1/RB1/MDM2	4
BP	GO:0035821	modification of morphology or physiology of other organism	5/71	164/18670	0.000401339831066078	0.00179239824780117	0.000757552688464609	NOS2/F2/CALM1/IFNG/BAD	5
BP	GO:0010831	positive regulation of myotube differentiation	3/71	38/18670	0.000404104332231536	0.00179239824780117	0.000757552688464609	BCL2/MAPK14/IL4R	3
BP	GO:0032094	response to food	3/71	38/18670	0.000404104332231536	0.00179239824780117	0.000757552688464609	AKT1/CYP1A1/MPO	3
BP	GO:0032620	interleukin-17 production	3/71	38/18670	0.000404104332231536	0.00179239824780117	0.000757552688464609	IL6/IL2/IFNG	3
BP	GO:0046326	positive regulation of glucose import	3/71	38/18670	0.000404104332231536	0.00179239824780117	0.000757552688464609	AKT1/MAPK14/NFE2L2	3
BP	GO:0046825	regulation of protein export from nucleus	3/71	38/18670	0.000404104332231536	0.00179239824780117	0.000757552688464609	TP53/IL1B/MDM2	3
BP	GO:0048009	insulin-like growth factor receptor signaling pathway	3/71	38/18670	0.000404104332231536	0.00179239824780117	0.000757552688464609	AR/AKT1/IGFBP3	3
BP	GO:1900077	negative regulation of cellular response to insulin stimulus	3/71	38/18670	0.000404104332231536	0.00179239824780117	0.000757552688464609	RELA/PTPN1/IL1B	3
BP	GO:1905898	positive regulation of response to endoplasmic reticulum stress	3/71	38/18670	0.000404104332231536	0.00179239824780117	0.000757552688464609	BAX/PTPN1/NFE2L2	3
BP	GO:0051480	regulation of cytosolic calcium ion concentration	7/71	357/18670	0.000410033835244311	0.00181625725678688	0.000767636639630819	BCL2/BAX/F2/CALM1/ESR1/IL2/CXCL10	7
BP	GO:0035710	CD4-positive, alpha-beta T cell activation	4/71	92/18670	0.000416869215239952	0.00184405953122231	0.000779387202191246	IL6/IL2/IFNG/IL4R	4
BP	GO:0033146	regulation of intracellular estrogen receptor signaling pathway	3/71	39/18670	0.000436589595620366	0.0019184363056554	0.000810822362039365	AR/ESR1/PARP1	3
BP	GO:0033574	response to testosterone	3/71	39/18670	0.000436589595620366	0.0019184363056554	0.000810822362039365	AR/SPP1/BAD	3
BP	GO:0042417	dopamine metabolic process	3/71	39/18670	0.000436589595620366	0.0019184363056554	0.000810822362039365	MAOB/MAOA/ABAT	3
BP	GO:0060969	negative regulation of gene silencing	3/71	39/18670	0.000436589595620366	0.0019184363056554	0.000810822362039365	PPP3CA/ESR1/TP53	3
BP	GO:1902042	negative regulation of extrinsic apoptotic signaling pathway via death domain receptors	3/71	39/18670	0.000436589595620366	0.0019184363056554	0.000810822362039365	HMOX1/ICAM1/SERPINE1	3
BP	GO:0043406	positive regulation of MAP kinase activity	6/71	258/18670	0.000444004195796408	0.0019484226677236	0.000823496023838523	PTPN1/MAPK14/MAPK1/SOD1/IL1B/CD40LG	6
BP	GO:0001906	cell killing	5/71	168/18670	0.000448116934915735	0.00196125448968425	0.000828919361668783	NOS2/F2/ICAM1/IFNG/BAD	5
BP	GO:0051302	regulation of cell division	5/71	168/18670	0.000448116934915735	0.00196125448968425	0.000828919361668783	CALM1/MYC/IL1B/IL1A/IGF2	5
BP	GO:0016311	dephosphorylation	8/71	478/18670	0.000450688319552085	0.00196989596625414	0.000832571660378546	BCL2/PON1/CALM1/PPP3CA/PTPN1/IFNG/IGFBP3/CYCS	8
BP	GO:0045621	positive regulation of lymphocyte differentiation	4/71	94/18670	0.000452374368713046	0.00197465002216012	0.000834580950354757	IL2/IFNG/IL4R/BAD	4
BP	GO:0038095	Fc-epsilon receptor signaling pathway	5/71	169/18670	0.000460428098724434	0.00200219539820992	0.000846222935447573	CALM1/RELA/MAPK8/PPP3CA/MAPK1	5
BP	GO:0045619	regulation of lymphocyte differentiation	5/71	169/18670	0.000460428098724434	0.00200219539820992	0.000846222935447573	SOD1/IL2/IFNG/IL4R/BAD	5
BP	GO:0006066	alcohol metabolic process	7/71	364/18670	0.000460504941588281	0.00200219539820992	0.000846222935447573	PON1/CALM1/CYP3A4/CYP1A1/SOD1/IL1B/IFNG	7
BP	GO:0045124	regulation of bone resorption	3/71	40/18670	0.000470705844515606	0.00203938522816817	0.000861941125142848	IL6/SPP1/CA2	3
BP	GO:0071470	cellular response to osmotic stress	3/71	40/18670	0.000470705844515606	0.00203938522816817	0.000861941125142848	PTGS2/CASP3/BAD	3
BP	GO:0044070	regulation of anion transport	4/71	95/18670	0.000470912589049742	0.00203938522816817	0.000861941125142848	AKT1/IL1B/CA2/ABAT	4
BP	GO:0034765	regulation of ion transmembrane transport	8/71	483/18670	0.000482788791764751	0.0020880773431503	0.000882520727168786	ADRB2/BAX/F2/CALM1/AKT1/CCL2/IFNG/CXCL10	8
BP	GO:0006937	regulation of muscle contraction	5/71	171/18670	0.000485814221740571	0.00209293333125833	0.000884573098538212	PTGS2/ADRB2/CALM1/SOD1/ABAT	5
BP	GO:0010634	positive regulation of epithelial cell migration	5/71	171/18670	0.000485814221740571	0.00209293333125833	0.000884573098538212	PTGS2/AKT1/HMOX1/IFNG/NFE2L2	5
BP	GO:0060401	cytosolic calcium ion transport	5/71	171/18670	0.000485814221740571	0.00209293333125833	0.000884573098538212	BCL2/BAX/F2/CALM1/CXCL10	5
BP	GO:0010660	regulation of muscle cell apoptotic process	4/71	96/18670	0.000489986268778925	0.00210815474181284	0.000891006390080389	HMOX1/TP53/IFNG/NFE2L2	4
BP	GO:0006308	DNA catabolic process	3/71	41/18670	0.000506486606274706	0.00215665264607294	0.000911503909424769	IL6/BAX/CASP3	3
BP	GO:0007520	myoblast fusion	3/71	41/18670	0.000506486606274706	0.00215665264607294	0.000911503909424769	MAPK14/CXCL10/IL4R	3
BP	GO:0030890	positive regulation of B cell proliferation	3/71	41/18670	0.000506486606274706	0.00215665264607294	0.000911503909424769	BCL2/CDKN1A/IL2	3
BP	GO:0050798	activated T cell proliferation	3/71	41/18670	0.000506486606274706	0.00215665264607294	0.000911503909424769	CASP3/IL2/IGF2	3
BP	GO:0050873	brown fat cell differentiation	3/71	41/18670	0.000506486606274706	0.00215665264607294	0.000911503909424769	PTGS2/ADRB2/MAPK14	3
BP	GO:0150077	regulation of neuroinflammatory response	3/71	41/18670	0.000506486606274706	0.00215665264607294	0.000911503909424769	IL6/PTGS2/IL1B	3
BP	GO:1900117	regulation of execution phase of apoptosis	3/71	41/18670	0.000506486606274706	0.00215665264607294	0.000911503909424769	IL6/BAX/TP53	3
BP	GO:1903053	regulation of extracellular matrix organization	3/71	41/18670	0.000506486606274706	0.00215665264607294	0.000911503909424769	IL6/DPP4/RB1	3
BP	GO:0030316	osteoclast differentiation	4/71	97/18670	0.000509604206624637	0.00216434219029769	0.000914753876282117	MAPK14/IFNG/CA2/CREB1	4
BP	GO:1902882	regulation of response to oxidative stress	4/71	97/18670	0.000509604206624637	0.00216434219029769	0.000914753876282117	AKT1/SOD1/NFE2L2/PARP1	4
BP	GO:0010469	regulation of signaling receptor activity	5/71	173/18670	0.000512241409362197	0.00217274633791163	0.000918305868495347	ADRB2/ESR2/CCL2/SERPINE1/IFNG	5
BP	GO:0031341	regulation of cell killing	4/71	98/18670	0.0005297752207735	0.0022413567032725	0.000947303869804166	NOS2/ICAM1/IFNG/BAD	4
BP	GO:0050764	regulation of phagocytosis	4/71	98/18670	0.0005297752207735	0.0022413567032725	0.000947303869804166	SOD1/IL1B/CCL2/IFNG	4
BP	GO:0002639	positive regulation of immunoglobulin production	3/71	42/18670	0.000543964973308512	0.00229550436306661	0.000970189244358296	IL6/IL2/IL4R	3
BP	GO:0042149	cellular response to glucose starvation	3/71	42/18670	0.000543964973308512	0.00229550436306661	0.000970189244358296	BCL2/TP53/NFE2L2	3
BP	GO:0007249	I-kappaB kinase/NF-kappaB signaling	6/71	269/18670	0.000553385493763073	0.00232847282019116	0.000984123281261015	CD14/RELA/AKT1/HMOX1/ESR1/IL1B	6
BP	GO:0043491	protein kinase B signaling	6/71	269/18670	0.000553385493763073	0.00232847282019116	0.000984123281261015	AKT1/ESR1/IL1B/CCL2/IGF2/ERBB3	6
BP	GO:0006986	response to unfolded protein	5/71	176/18670	0.000553894292075775	0.00232847282019116	0.000984123281261015	BAX/PTPN1/CCL2/CXCL8/NFE2L2	5
BP	GO:0010657	muscle cell apoptotic process	4/71	100/18670	0.000571811841532203	0.00239464349880237	0.00101209015499622	HMOX1/TP53/IFNG/NFE2L2	4
BP	GO:0055024	regulation of cardiac muscle tissue development	4/71	100/18670	0.000571811841532203	0.00239464349880237	0.00101209015499622	MAPK14/MAPK1/ERBB3/CREB1	4
BP	GO:0070498	interleukin-1-mediated signaling pathway	4/71	100/18670	0.000571811841532203	0.00239464349880237	0.00101209015499622	IL6/RELA/IL1B/IL1A	4
BP	GO:1901617	organic hydroxy compound biosynthetic process	6/71	271/18670	0.000575346336707027	0.00240639152234878	0.00101705542810595	CYP3A4/TP53/SOD1/IL1B/IFNG/TYR	6
BP	GO:0031279	regulation of cyclase activity	3/71	43/18670	0.000583173606374582	0.00242989002656076	0.00102698701282074	NOS2/MAPK8/MAPK14	3
BP	GO:0032459	regulation of protein oligomerization	3/71	43/18670	0.000583173606374582	0.00242989002656076	0.00102698701282074	BAX/MMP1/TP53	3
BP	GO:0034198	cellular response to amino acid starvation	3/71	43/18670	0.000583173606374582	0.00242989002656076	0.00102698701282074	MAPK8/CDKN1A/MAPK1	3
BP	GO:0002367	cytokine production involved in immune response	4/71	102/18670	0.000616167024810539	0.00256412507172103	0.0010837211228167	IL6/HMOX1/MAPK14/IL1B	4
BP	GO:0006631	fatty acid metabolic process	7/71	383/18670	0.000622927852405472	0.00257583921013032	0.00108867207445699	PTGS2/PON1/AKT1/CYP3A4/CYP1A1/MAPK14/IL1B	7
BP	GO:0010828	positive regulation of glucose transmembrane transport	3/71	44/18670	0.000624144737850591	0.00257583921013032	0.00108867207445699	AKT1/MAPK14/NFE2L2	3
BP	GO:0014002	astrocyte development	3/71	44/18670	0.000624144737850591	0.00257583921013032	0.00108867207445699	IL6/IL1B/IFNG	3
BP	GO:0070897	transcription preinitiation complex assembly	3/71	44/18670	0.000624144737850591	0.00257583921013032	0.00108867207445699	ESR1/TP53/CREB1	3
BP	GO:0090311	regulation of protein deacetylation	3/71	44/18670	0.000624144737850591	0.00257583921013032	0.00108867207445699	MAPK8/TP53/IFNG	3
BP	GO:0022408	negative regulation of cell-cell adhesion	5/71	181/18670	0.000628913640876439	0.00257583921013032	0.00108867207445699	CASP3/AKT1/IL2/IL4R/ABAT	5
BP	GO:0051147	regulation of muscle cell differentiation	5/71	181/18670	0.000628913640876439	0.00257583921013032	0.00108867207445699	BCL2/MAPK14/CXCL10/IGF2/IL4R	5
BP	GO:0010918	positive regulation of mitochondrial membrane potential	2/71	10/18670	0.000629129213140921	0.00257583921013032	0.00108867207445699	AKT1/BAD	2
BP	GO:0032070	regulation of deoxyribonuclease activity	2/71	10/18670	0.000629129213140921	0.00257583921013032	0.00108867207445699	AKT1/PCNA	2
BP	GO:0051918	negative regulation of fibrinolysis	2/71	10/18670	0.000629129213140921	0.00257583921013032	0.00108867207445699	F2/SERPINE1	2
BP	GO:0060068	vagina development	2/71	10/18670	0.000629129213140921	0.00257583921013032	0.00108867207445699	BAX/ESR1	2
BP	GO:0090336	positive regulation of brown fat cell differentiation	2/71	10/18670	0.000629129213140921	0.00257583921013032	0.00108867207445699	PTGS2/MAPK14	2
BP	GO:0106049	regulation of cellular response to osmotic stress	2/71	10/18670	0.000629129213140921	0.00257583921013032	0.00108867207445699	PTGS2/BAD	2
BP	GO:0051271	negative regulation of cellular component movement	7/71	384/18670	0.000632595241816936	0.00258682069144472	0.00109331337038732	BCL2/AKT1/HMOX1/CCL2/SERPINE1/NFE2L2/IGFBP3	7
BP	GO:0032091	negative regulation of protein binding	4/71	103/18670	0.000639236299078755	0.00261074231059392	0.00110342378358435	ADRB2/BAX/AKT1/MAPK8	4
BP	GO:0030593	neutrophil chemotaxis	4/71	104/18670	0.000662911907479727	0.00270075221565815	0.00114146624744722	IL1B/CCL2/CXCL8/CXCL10	4
BP	GO:0032414	positive regulation of ion transmembrane transporter activity	4/71	104/18670	0.000662911907479727	0.00270075221565815	0.00114146624744722	ADRB2/CALM1/CCL2/IFNG	4
BP	GO:0031018	endocrine pancreas development	3/71	45/18670	0.000666910174987874	0.00271369121758321	0.00114693488462448	IL6/AKT1/BAD	3
BP	GO:0043401	steroid hormone mediated signaling pathway	5/71	184/18670	0.000677439559805003	0.00275314106817304	0.00116360826645272	AR/ESR1/ESR2/RB1/PARP1	5
BP	GO:0014706	striated muscle tissue development	7/71	390/18670	0.000693137374111485	0.00281347273624588	0.00118910729681843	BCL2/PPP3CA/MAPK14/MAPK1/RB1/ERBB3/CREB1	7
BP	GO:0030308	negative regulation of cell growth	5/71	186/18670	0.000711314235298564	0.00285192822864305	0.00120536041561469	BCL2/ESR2/CDKN1A/TP53/SPP1	5
BP	GO:0007157	heterophilic cell-cell adhesion via plasma membrane cell adhesion molecules	3/71	46/18670	0.000711501303145257	0.00285192822864305	0.00120536041561469	ICAM1/SELE/VCAM1	3
BP	GO:0014075	response to amine	3/71	46/18670	0.000711501303145257	0.00285192822864305	0.00120536041561469	ICAM1/PPP3CA/SOD1	3
BP	GO:0035196	production of miRNAs involved in gene silencing by miRNA	3/71	46/18670	0.000711501303145257	0.00285192822864305	0.00120536041561469	PPP3CA/ESR1/TP53	3
BP	GO:0045776	negative regulation of blood pressure	3/71	46/18670	0.000711501303145257	0.00285192822864305	0.00120536041561469	ADRB2/NOS2/ABAT	3
BP	GO:0060443	mammary gland morphogenesis	3/71	46/18670	0.000711501303145257	0.00285192822864305	0.00120536041561469	BAX/AR/ESR1	3
BP	GO:0071354	cellular response to interleukin-6	3/71	46/18670	0.000711501303145257	0.00285192822864305	0.00120536041561469	IL6/RELA/ICAM1	3
BP	GO:0071675	regulation of mononuclear cell migration	3/71	46/18670	0.000711501303145257	0.00285192822864305	0.00120536041561469	MAPK14/SERPINE1/CXCL10	3
BP	GO:1900015	regulation of cytokine production involved in inflammatory response	3/71	46/18670	0.000711501303145257	0.00285192822864305	0.00120536041561469	NOS2/F2/MAPK14	3
BP	GO:1990928	response to amino acid starvation	3/71	46/18670	0.000711501303145257	0.00285192822864305	0.00120536041561469	MAPK8/CDKN1A/MAPK1	3
BP	GO:1901989	positive regulation of cell cycle phase transition	4/71	106/18670	0.000712117836485416	0.00285192822864305	0.00120536041561469	AKT1/CYP1A1/RB1/MDM2	4
BP	GO:0016579	protein deubiquitination	6/71	283/18670	0.000721735996535082	0.00288344889656873	0.00121868254799157	ADRB2/AR/ESR1/TP53/MYC/MDM2	6
BP	GO:0032409	regulation of transporter activity	6/71	283/18670	0.000721735996535082	0.00288344889656873	0.00121868254799157	ADRB2/BCL2/PON1/CALM1/CCL2/IFNG	6
BP	GO:0051341	regulation of oxidoreductase activity	4/71	107/18670	0.000737666038765599	0.00293997334290637	0.00124257246550269	CALM1/AKT1/IL1B/IFNG	4
BP	GO:0062014	negative regulation of small molecule metabolic process	4/71	107/18670	0.000737666038765599	0.00293997334290637	0.00124257246550269	AKT1/TP53/SOD1/PARP1	4
BP	GO:0043370	regulation of CD4-positive, alpha-beta T cell differentiation	3/71	47/18670	0.000757949089003275	0.00299201968367087	0.00126456972276361	IL2/IFNG/IL4R	3
BP	GO:0048066	developmental pigmentation	3/71	47/18670	0.000757949089003275	0.00299201968367087	0.00126456972276361	BCL2/BAX/TYR	3
BP	GO:0048806	genitalia development	3/71	47/18670	0.000757949089003275	0.00299201968367087	0.00126456972276361	BAX/AR/ESR1	3
BP	GO:0070231	T cell apoptotic process	3/71	47/18670	0.000757949089003275	0.00299201968367087	0.00126456972276361	BAX/AKT1/TP53	3
BP	GO:0040013	negative regulation of locomotion	7/71	396/18670	0.000758197795080353	0.00299201968367087	0.00126456972276361	BCL2/AKT1/HMOX1/CCL2/SERPINE1/NFE2L2/IGFBP3	7
BP	GO:0044262	cellular carbohydrate metabolic process	6/71	286/18670	0.000762482213389465	0.00299201968367087	0.00126456972276361	CALM1/AKT1/TP53/IGFBP3/IGF2/BAD	6
BP	GO:0006275	regulation of DNA replication	4/71	108/18670	0.000763856336557656	0.00299201968367087	0.00126456972276361	CDK2/TP53/CHEK2/PCNA	4
BP	GO:0099565	chemical synaptic transmission, postsynaptic	4/71	108/18670	0.000763856336557656	0.00299201968367087	0.00126456972276361	ADRB2/AKT1/PPP3CA/ABAT	4
BP	GO:1904659	glucose transmembrane transport	4/71	108/18670	0.000763856336557656	0.00299201968367087	0.00126456972276361	AKT1/MAPK14/IL1B/NFE2L2	4
BP	GO:2000278	regulation of DNA biosynthetic process	4/71	108/18670	0.000763856336557656	0.00299201968367087	0.00126456972276361	CDKN1A/MAPK1/TP53/MYC	4
BP	GO:0032494	response to peptidoglycan	2/71	11/18670	0.000767045046177442	0.00299201968367087	0.00126456972276361	IL6/RELA	2
BP	GO:0033148	positive regulation of intracellular estrogen receptor signaling pathway	2/71	11/18670	0.000767045046177442	0.00299201968367087	0.00126456972276361	AR/PARP1	2
BP	GO:0043619	regulation of transcription from RNA polymerase II promoter in response to oxidative stress	2/71	11/18670	0.000767045046177442	0.00299201968367087	0.00126456972276361	HMOX1/NFE2L2	2
BP	GO:0046886	positive regulation of hormone biosynthetic process	2/71	11/18670	0.000767045046177442	0.00299201968367087	0.00126456972276361	IL1B/IFNG	2
BP	GO:0051024	positive regulation of immunoglobulin secretion	2/71	11/18670	0.000767045046177442	0.00299201968367087	0.00126456972276361	IL6/IL2	2
BP	GO:0060736	prostate gland growth	2/71	11/18670	0.000767045046177442	0.00299201968367087	0.00126456972276361	AR/ESR1	2
BP	GO:0072683	T cell extravasation	2/71	11/18670	0.000767045046177442	0.00299201968367087	0.00126456972276361	ICAM1/CCL2	2
BP	GO:1902065	response to L-glutamate	2/71	11/18670	0.000767045046177442	0.00299201968367087	0.00126456972276361	PCNA/CREB1	2
BP	GO:0051604	protein maturation	7/71	397/18670	0.00076949705793663	0.00299804048546739	0.00126711439975894	CASP3/F2/IL1B/SERPINE1/PARP1/MDM2/BAD	7
BP	GO:0071824	protein-DNA complex subunit organization	6/71	288/18670	0.000790620915672769	0.00307670875202847	0.001300363348146	ESR1/RB1/TP53/MYC/PARP1/CREB1	6
BP	GO:0046850	regulation of bone remodeling	3/71	48/18670	0.000806284083758849	0.00313027938400494	0.00132300484331947	IL6/SPP1/CA2	3
BP	GO:0051972	regulation of telomerase activity	3/71	48/18670	0.000806284083758849	0.00313027938400494	0.00132300484331947	MAPK1/TP53/MYC	3
BP	GO:0006939	smooth muscle contraction	4/71	110/18670	0.000818199078660365	0.00317280488787216	0.00134097814240211	PTGS2/ADRB2/SOD1/ABAT	4
BP	GO:0043112	receptor metabolic process	5/71	192/18670	0.000820574503596853	0.00317828152801598	0.00134329283082015	ACHE/SELE/PTPN1/CXCL8/IFNG	5
BP	GO:0072676	lymphocyte migration	4/71	111/18670	0.000846369470035211	0.00327434847727573	0.0013838952894387	AKT1/ICAM1/CCL2/CXCL10	4
BP	GO:0005996	monosaccharide metabolic process	6/71	292/18670	0.000849305683769811	0.00328186037053908	0.00138707017255639	AKT1/MAPK14/TP53/IGFBP3/IGF2/BAD	6
BP	GO:0002534	cytokine production involved in inflammatory response	3/71	49/18670	0.000856536426300581	0.00329437087038685	0.00139235770438998	NOS2/F2/MAPK14	3
BP	GO:0002686	negative regulation of leukocyte migration	3/71	49/18670	0.000856536426300581	0.00329437087038685	0.00139235770438998	AKT1/HMOX1/CCL2	3
BP	GO:0032757	positive regulation of interleukin-8 production	3/71	49/18670	0.000856536426300581	0.00329437087038685	0.00139235770438998	CD14/IL1B/SERPINE1	3
BP	GO:0097300	programmed necrotic cell death	3/71	49/18670	0.000856536426300581	0.00329437087038685	0.00139235770438998	CD14/BAX/TP53	3
BP	GO:0002065	columnar/cuboidal epithelial cell differentiation	4/71	112/18670	0.000875217849168778	0.00335839407239182	0.00141941695244631	CDKN1A/SOD1/SERPINE1/BAD	4
BP	GO:0008645	hexose transmembrane transport	4/71	112/18670	0.000875217849168778	0.00335839407239182	0.00141941695244631	AKT1/MAPK14/IL1B/NFE2L2	4
BP	GO:0016236	macroautophagy	6/71	295/18670	0.000895486350062246	0.0034321776483222	0.00145060139841369	ADRB2/CASP3/AKT1/MAPK8/HMOX1/TP53	6
BP	GO:0071897	DNA biosynthetic process	5/71	196/18670	0.000900073976454136	0.00344575884257384	0.00145634145659022	CDKN1A/MAPK1/TP53/MYC/PCNA	5
BP	GO:0060537	muscle tissue development	7/71	408/18670	0.000902830025783931	0.00345230484946347	0.00145910811021981	BCL2/PPP3CA/MAPK14/MAPK1/RB1/ERBB3/CREB1	7
BP	GO:0046620	regulation of organ growth	4/71	113/18670	0.000904753202451759	0.00345565459269769	0.00146052387091689	AKT1/MAPK14/MAPK1/SOD1	4
BP	GO:0014009	glial cell proliferation	3/71	50/18670	0.000908735846364703	0.00345885616263382	0.00146187700653582	IL6/IL1B/CREB1	3
BP	GO:0070741	response to interleukin-6	3/71	50/18670	0.000908735846364703	0.00345885616263382	0.00146187700653582	IL6/RELA/ICAM1	3
BP	GO:1900087	positive regulation of G1/S transition of mitotic cell cycle	3/71	50/18670	0.000908735846364703	0.00345885616263382	0.00146187700653582	AKT1/CYP1A1/MDM2	3
BP	GO:0019336	phenol-containing compound catabolic process	2/71	12/18670	0.000918191456476163	0.00347879656299809	0.00147030476745533	MAOB/MAOA	2
BP	GO:0031392	regulation of prostaglandin biosynthetic process	2/71	12/18670	0.000918191456476163	0.00347879656299809	0.00147030476745533	PTGS2/IL1B	2
BP	GO:1902510	regulation of apoptotic DNA fragmentation	2/71	12/18670	0.000918191456476163	0.00347879656299809	0.00147030476745533	IL6/BAX	2
BP	GO:1903894	regulation of IRE1-mediated unfolded protein response	2/71	12/18670	0.000918191456476163	0.00347879656299809	0.00147030476745533	BAX/PTPN1	2
BP	GO:0010952	positive regulation of peptidase activity	5/71	197/18670	0.000920815542025287	0.0034847377163801	0.00147281578124518	BAX/MAPK14/MYC/CYCS/BAD	5
BP	GO:1903522	regulation of blood circulation	6/71	297/18670	0.000927334621400969	0.0035053886032339	0.0014815438275231	PTGS2/CALM1/AKT1/ICAM1/IL2/MDM2	6
BP	GO:0006690	icosanoid metabolic process	4/71	114/18670	0.00093498451976346	0.00352622733167934	0.00149035126458537	PTGS2/PON1/CYP1A1/IL1B	4
BP	GO:0015749	monosaccharide transmembrane transport	4/71	114/18670	0.00093498451976346	0.00352622733167934	0.00149035126458537	AKT1/MAPK14/IL1B/NFE2L2	4
BP	GO:0070646	protein modification by small protein removal	6/71	299/18670	0.000960050202153744	0.00360851884055269	0.00152513156737873	ADRB2/AR/ESR1/TP53/MYC/MDM2	6
BP	GO:0031050	dsRNA processing	3/71	51/18670	0.000962911667671857	0.00360851884055269	0.00152513156737873	PPP3CA/ESR1/TP53	3
BP	GO:0048146	positive regulation of fibroblast proliferation	3/71	51/18670	0.000962911667671857	0.00360851884055269	0.00152513156737873	ESR1/CDKN1A/MYC	3
BP	GO:0050999	regulation of nitric-oxide synthase activity	3/71	51/18670	0.000962911667671857	0.00360851884055269	0.00152513156737873	CALM1/AKT1/IL1B	3
BP	GO:0070918	production of small RNA involved in gene silencing by RNA	3/71	51/18670	0.000962911667671857	0.00360851884055269	0.00152513156737873	PPP3CA/ESR1/TP53	3
BP	GO:0035966	response to topologically incorrect protein	5/71	199/18670	0.000963365181371794	0.00360851884055269	0.00152513156737873	BAX/PTPN1/CCL2/CXCL8/NFE2L2	5
BP	GO:0032963	collagen metabolic process	4/71	115/18670	0.000965920793569397	0.00361398936369502	0.00152744367046121	IL6/F2/MMP1/MMP2	4
BP	GO:0034219	carbohydrate transmembrane transport	4/71	116/18670	0.000997571018029631	0.00372818160758526	0.001575706740048	AKT1/MAPK14/IL1B/NFE2L2	4
BP	GO:0002703	regulation of leukocyte mediated immunity	5/71	201/18670	0.00100736222473597	0.00376051509234017	0.0015893724074484	IL6/HMOX1/IL1B/IL2/IL4R	5
BP	GO:2000677	regulation of transcription regulatory region DNA binding	3/71	52/18670	0.00101909281104473	0.00380000709203118	0.00160606360349005	RB1/IFNG/PARP1	3
BP	GO:0009746	response to hexose	5/71	202/18670	0.00102991308943054	0.00382318989964985	0.00161586175982011	PTGS2/CASP3/ICAM1/PPP3CA/BAD	5
BP	GO:0010508	positive regulation of autophagy	4/71	117/18670	0.00102994418811779	0.00382318989964985	0.00161586175982011	ADRB2/HMOX1/IFNG/BAD	4
BP	GO:0051153	regulation of striated muscle cell differentiation	4/71	117/18670	0.00102994418811779	0.00382318989964985	0.00161586175982011	BCL2/MAPK14/CXCL10/IL4R	4
BP	GO:1900371	regulation of purine nucleotide biosynthetic process	4/71	117/18670	0.00102994418811779	0.00382318989964985	0.00161586175982011	NOS2/TP53/IFNG/PARP1	4
BP	GO:0030278	regulation of ossification	5/71	203/18670	0.00105283730791113	0.00390377878214238	0.00164992245178266	IL6/ADRB2/BCL2/MAPK14/MAPK1	5
BP	GO:0030808	regulation of nucleotide biosynthetic process	4/71	118/18670	0.00106304929875069	0.00393280570165614	0.00166219060755802	NOS2/TP53/IFNG/PARP1	4
BP	GO:1990266	neutrophil migration	4/71	118/18670	0.00106304929875069	0.00393280570165614	0.00166219060755802	IL1B/CCL2/CXCL8/CXCL10	4
BP	GO:0030195	negative regulation of blood coagulation	3/71	53/18670	0.00107730779750673	0.00395586558395177	0.00167193680980418	F2/SERPINE1/ABAT	3
BP	GO:0045661	regulation of myoblast differentiation	3/71	53/18670	0.00107730779750673	0.00395586558395177	0.00167193680980418	MAPK14/CXCL10/IGFBP3	3
BP	GO:0070228	regulation of lymphocyte apoptotic process	3/71	53/18670	0.00107730779750673	0.00395586558395177	0.00167193680980418	BAX/TP53/IL2	3
BP	GO:0030656	regulation of vitamin metabolic process	2/71	13/18670	0.0010824686734268	0.00395586558395177	0.00167193680980418	IL1B/IFNG	2
BP	GO:0042178	xenobiotic catabolic process	2/71	13/18670	0.0010824686734268	0.00395586558395177	0.00167193680980418	CYP1A1/GSTM1	2
BP	GO:0043568	positive regulation of insulin-like growth factor receptor signaling pathway	2/71	13/18670	0.0010824686734268	0.00395586558395177	0.00167193680980418	AR/IGFBP3	2
BP	GO:0045086	positive regulation of interleukin-2 biosynthetic process	2/71	13/18670	0.0010824686734268	0.00395586558395177	0.00167193680980418	IL1B/IL1A	2
BP	GO:0047484	regulation of response to osmotic stress	2/71	13/18670	0.0010824686734268	0.00395586558395177	0.00167193680980418	PTGS2/BAD	2
BP	GO:0090594	inflammatory response to wounding	2/71	13/18670	0.0010824686734268	0.00395586558395177	0.00167193680980418	HMOX1/IL1A	2
BP	GO:1900103	positive regulation of endoplasmic reticulum unfolded protein response	2/71	13/18670	0.0010824686734268	0.00395586558395177	0.00167193680980418	BAX/PTPN1	2
BP	GO:1902947	regulation of tau-protein kinase activity	2/71	13/18670	0.0010824686734268	0.00395586558395177	0.00167193680980418	RB1/IFNG	2
BP	GO:0097164	ammonium ion metabolic process	5/71	205/18670	0.00109982124861216	0.00401483420400457	0.0016968597512938	PON1/ACHE/MAOB/MAOA/ABAT	5
BP	GO:0050679	positive regulation of epithelial cell proliferation	5/71	206/18670	0.00112388871927601	0.00409815776089596	0.00173207624663067	AR/AKT1/HMOX1/MYC/BAD	5
BP	GO:0022612	gland morphogenesis	4/71	120/18670	0.00113149131588493	0.00412077901151882	0.00174163706228467	BCL2/BAX/AR/ESR1	4
BP	GO:0002720	positive regulation of cytokine production involved in immune response	3/71	54/18670	0.00113758475136171	0.00412077901151882	0.00174163706228467	IL6/MAPK14/IL1B	3
BP	GO:0006584	catecholamine metabolic process	3/71	54/18670	0.00113758475136171	0.00412077901151882	0.00174163706228467	MAOB/MAOA/ABAT	3
BP	GO:0009712	catechol-containing compound metabolic process	3/71	54/18670	0.00113758475136171	0.00412077901151882	0.00174163706228467	MAOB/MAOA/ABAT	3
BP	GO:0051353	positive regulation of oxidoreductase activity	3/71	54/18670	0.00113758475136171	0.00412077901151882	0.00174163706228467	AKT1/IL1B/IFNG	3
BP	GO:1900047	negative regulation of hemostasis	3/71	54/18670	0.00113758475136171	0.00412077901151882	0.00174163706228467	F2/SERPINE1/ABAT	3
BP	GO:0034284	response to monosaccharide	5/71	207/18670	0.00114834504022123	0.00415519586922154	0.00175618326211118	PTGS2/CASP3/ICAM1/PPP3CA/BAD	5
BP	GO:0034101	erythrocyte homeostasis	4/71	122/18670	0.0012029689952147	0.0043433235056986	0.00183569494259989	CASP3/HMOX1/MAPK14/RB1	4
BP	GO:0043500	muscle adaptation	4/71	122/18670	0.0012029689952147	0.0043433235056986	0.00183569494259989	HMOX1/PPP3CA/IL1B/PARP1	4
BP	GO:1903531	negative regulation of secretion by cell	5/71	211/18670	0.00125013699044313	0.00450869078520474	0.00190558701448047	HMOX1/PPP3CA/MAOB/IL1B/ABAT	5
BP	GO:0032310	prostaglandin secretion	2/71	14/18670	0.00125977747536361	0.00451095762984954	0.00190654509076575	NOS2/IL1B	2
BP	GO:0045591	positive regulation of regulatory T cell differentiation	2/71	14/18670	0.00125977747536361	0.00451095762984954	0.00190654509076575	IL2/IFNG	2
BP	GO:0051917	regulation of fibrinolysis	2/71	14/18670	0.00125977747536361	0.00451095762984954	0.00190654509076575	F2/SERPINE1	2
BP	GO:0071391	cellular response to estrogen stimulus	2/71	14/18670	0.00125977747536361	0.00451095762984954	0.00190654509076575	ESR1/MDM2	2
BP	GO:1903624	regulation of DNA catabolic process	2/71	14/18670	0.00125977747536361	0.00451095762984954	0.00190654509076575	IL6/BAX	2
BP	GO:2001279	regulation of unsaturated fatty acid biosynthetic process	2/71	14/18670	0.00125977747536361	0.00451095762984954	0.00190654509076575	PTGS2/IL1B	2
BP	GO:0000768	syncytium formation by plasma membrane fusion	3/71	56/18670	0.0012644350932154	0.00451095762984954	0.00190654509076575	MAPK14/CXCL10/IL4R	3
BP	GO:0006749	glutathione metabolic process	3/71	56/18670	0.0012644350932154	0.00451095762984954	0.00190654509076575	GSTM1/SOD1/NFE2L2	3
BP	GO:0031295	T cell costimulation	3/71	56/18670	0.0012644350932154	0.00451095762984954	0.00190654509076575	DPP4/AKT1/CD40LG	3
BP	GO:0140253	cell-cell fusion	3/71	56/18670	0.0012644350932154	0.00451095762984954	0.00190654509076575	MAPK14/CXCL10/IL4R	3
BP	GO:0006898	receptor-mediated endocytosis	6/71	316/18670	0.00127542878787855	0.00454526457883283	0.0019210448379437	CD14/ADRB2/ACHE/SELE/CXCL8/SERPINE1	6
BP	GO:0051209	release of sequestered calcium ion into cytosol	4/71	124/18670	0.00127755420765724	0.00454792760007433	0.0019221703572882	BAX/F2/CALM1/CXCL10	4
BP	GO:0070371	ERK1 and ERK2 cascade	6/71	317/18670	0.00129618227637291	0.00460926887072265	0.00194809609368661	ICAM1/PTPN1/MAPK1/MYC/IL1B/CCL2	6
BP	GO:0007254	JNK cascade	5/71	214/18670	0.00133075600453227	0.00470793907089137	0.00198979880986637	AKT1/MAPK8/PTPN1/IL1B/CD40LG	5
BP	GO:0045732	positive regulation of protein catabolic process	5/71	214/18670	0.00133075600453227	0.00470793907089137	0.00198979880986637	AKT1/IL1B/IFNG/NFE2L2/MDM2	5
BP	GO:0002066	columnar/cuboidal epithelial cell development	3/71	57/18670	0.00133106277367929	0.00470793907089137	0.00198979880986637	CDKN1A/SOD1/BAD	3
BP	GO:0031294	lymphocyte costimulation	3/71	57/18670	0.00133106277367929	0.00470793907089137	0.00198979880986637	DPP4/AKT1/CD40LG	3
BP	GO:0050819	negative regulation of coagulation	3/71	57/18670	0.00133106277367929	0.00470793907089137	0.00198979880986637	F2/SERPINE1/ABAT	3
BP	GO:0051283	negative regulation of sequestering of calcium ion	4/71	126/18670	0.00135531874322668	0.00478859941397006	0.002023889704469	BAX/F2/CALM1/CXCL10	4
BP	GO:0006470	protein dephosphorylation	6/71	321/18670	0.00138179663728517	0.0048769293080653	0.00206122211584897	BCL2/CALM1/PPP3CA/PTPN1/IGFBP3/CYCS	6
BP	GO:0032368	regulation of lipid transport	4/71	127/18670	0.00139541566317836	0.00490397169982437	0.00207265151587473	PON1/AKT1/IL1B/SPP1	4
BP	GO:0043620	regulation of DNA-templated transcription in response to stress	4/71	127/18670	0.00139541566317836	0.00490397169982437	0.00207265151587473	RELA/HMOX1/TP53/NFE2L2	4
BP	GO:0006949	syncytium formation	3/71	58/18670	0.00139986101249532	0.00490397169982437	0.00207265151587473	MAPK14/CXCL10/IL4R	3
BP	GO:0019229	regulation of vasoconstriction	3/71	58/18670	0.00139986101249532	0.00490397169982437	0.00207265151587473	PTGS2/AKT1/ICAM1	3
BP	GO:0042093	T-helper cell differentiation	3/71	58/18670	0.00139986101249532	0.00490397169982437	0.00207265151587473	IL6/IL2/IL4R	3
BP	GO:0061900	glial cell activation	3/71	58/18670	0.00139986101249532	0.00490397169982437	0.00207265151587473	IL6/IL1B/IFNG	3
BP	GO:1902041	regulation of extrinsic apoptotic signaling pathway via death domain receptors	3/71	58/18670	0.00139986101249532	0.00490397169982437	0.00207265151587473	HMOX1/ICAM1/SERPINE1	3
BP	GO:0060562	epithelial tube morphogenesis	6/71	322/18670	0.00140386102445361	0.00491276922661391	0.00207636976882406	BCL2/CASP3/AR/ESR1/MYC/CXCL10	6
BP	GO:0043393	regulation of protein binding	5/71	217/18670	0.00141515803736201	0.00494705669840534	0.00209086128401502	ADRB2/BCL2/BAX/AKT1/MAPK8	5
BP	GO:0002576	platelet degranulation	4/71	128/18670	0.00143633428563674	0.00500517755290521	0.00211542591948944	CALM1/SOD1/SERPINE1/IGF2	4
BP	GO:0010595	positive regulation of endothelial cell migration	4/71	128/18670	0.00143633428563674	0.00500517755290521	0.00211542591948944	PTGS2/AKT1/HMOX1/NFE2L2	4
BP	GO:0051282	regulation of sequestering of calcium ion	4/71	128/18670	0.00143633428563674	0.00500517755290521	0.00211542591948944	BAX/F2/CALM1/CXCL10	4
BP	GO:0032352	positive regulation of hormone metabolic process	2/71	15/18670	0.00145001918692842	0.00501578964031845	0.00211991109200062	IL1B/IFNG	2
BP	GO:0045838	positive regulation of membrane potential	2/71	15/18670	0.00145001918692842	0.00501578964031845	0.00211991109200062	AKT1/BAD	2
BP	GO:0048070	regulation of developmental pigmentation	2/71	15/18670	0.00145001918692842	0.00501578964031845	0.00211991109200062	BCL2/BAX	2
BP	GO:0051044	positive regulation of membrane protein ectodomain proteolysis	2/71	15/18670	0.00145001918692842	0.00501578964031845	0.00211991109200062	IL1B/IFNG	2
BP	GO:0051770	positive regulation of nitric-oxide synthase biosynthetic process	2/71	15/18670	0.00145001918692842	0.00501578964031845	0.00211991109200062	CCL2/IFNG	2
BP	GO:0051883	killing of cells in other organism involved in symbiotic interaction	2/71	15/18670	0.00145001918692842	0.00501578964031845	0.00211991109200062	F2/BAD	2
BP	GO:2000402	negative regulation of lymphocyte migration	2/71	15/18670	0.00145001918692842	0.00501578964031845	0.00211991109200062	AKT1/CCL2	2
BP	GO:0032890	regulation of organic acid transport	3/71	59/18670	0.00147085599591142	0.00506662295042555	0.00214139566485291	AKT1/IL1B/ABAT	3
BP	GO:0033619	membrane protein proteolysis	3/71	59/18670	0.00147085599591142	0.00506662295042555	0.00214139566485291	RELA/IL1B/IFNG	3
BP	GO:0043388	positive regulation of DNA binding	3/71	59/18670	0.00147085599591142	0.00506662295042555	0.00214139566485291	RB1/IFNG/PARP1	3
BP	GO:0097755	positive regulation of blood vessel diameter	3/71	59/18670	0.00147085599591142	0.00506662295042555	0.00214139566485291	ADRB2/HMOX1/SOD1	3
BP	GO:0034754	cellular hormone metabolic process	4/71	129/18670	0.00147808355039332	0.00507562509500308	0.00214520039900449	CYP3A4/CYP1A1/ESR1/SPP1	4
BP	GO:0044106	cellular amine metabolic process	4/71	129/18670	0.00147808355039332	0.00507562509500308	0.00214520039900449	MAOB/MAOA/NQO1/ABAT	4
BP	GO:1903038	negative regulation of leukocyte cell-cell adhesion	4/71	129/18670	0.00147808355039332	0.00507562509500308	0.00214520039900449	CASP3/AKT1/IL2/IL4R	4
BP	GO:0044282	small molecule catabolic process	7/71	445/18670	0.00149022457868918	0.00511199699550343	0.00216057289283638	PON1/NOS2/AKT1/CYP1A1/TP53/BAD/ABAT	7
BP	GO:0033013	tetrapyrrole metabolic process	3/71	60/18670	0.00154407353154314	0.005280251455018	0.00223168522421016	PRSS1/HMOX1/CYP1A1	3
BP	GO:0046324	regulation of glucose import	3/71	60/18670	0.00154407353154314	0.005280251455018	0.00223168522421016	AKT1/MAPK14/NFE2L2	3
BP	GO:1902808	positive regulation of cell cycle G1/S phase transition	3/71	60/18670	0.00154407353154314	0.005280251455018	0.00223168522421016	AKT1/CYP1A1/MDM2	3
BP	GO:0046887	positive regulation of hormone secretion	4/71	131/18670	0.00156410971669885	0.00533770637549763	0.00225596840431718	SPP1/BAD/ABAT/CREB1	4
BP	GO:0051208	sequestering of calcium ion	4/71	131/18670	0.00156410971669885	0.00533770637549763	0.00225596840431718	BAX/F2/CALM1/CXCL10	4
BP	GO:0001655	urogenital system development	6/71	330/18670	0.00159022886721499	0.00542123477459655	0.00229127147570668	BCL2/BAX/AR/ESR1/MYC/CA2	6
BP	GO:0043280	positive regulation of cysteine-type endopeptidase activity involved in apoptotic process	4/71	132/18670	0.00160840444635139	0.0054775383621874	0.00231506804781445	BAX/MYC/CYCS/BAD	4
BP	GO:0006879	cellular iron ion homeostasis	3/71	61/18670	0.00161953905132395	0.00549278403840599	0.00232151159517957	HMOX1/SOD1/MYC	3
BP	GO:0032370	positive regulation of lipid transport	3/71	61/18670	0.00161953905132395	0.00549278403840599	0.00232151159517957	PON1/IL1B/SPP1	3
BP	GO:0090303	positive regulation of wound healing	3/71	61/18670	0.00161953905132395	0.00549278403840599	0.00232151159517957	F2/SERPINE1/NFE2L2	3
BP	GO:2000514	regulation of CD4-positive, alpha-beta T cell activation	3/71	61/18670	0.00161953905132395	0.00549278403840599	0.00232151159517957	IL2/IFNG/IL4R	3
BP	GO:0002830	positive regulation of type 2 immune response	2/71	16/18670	0.00165309567644543	0.00555678824958131	0.00234856281680869	IL6/IL4R	2
BP	GO:0010225	response to UV-C	2/71	16/18670	0.00165309567644543	0.00555678824958131	0.00234856281680869	TP53/MDM2	2
BP	GO:0019372	lipoxygenase pathway	2/71	16/18670	0.00165309567644543	0.00555678824958131	0.00234856281680869	PTGS2/PON1	2
BP	GO:0042447	hormone catabolic process	2/71	16/18670	0.00165309567644543	0.00555678824958131	0.00234856281680869	ACHE/SPP1	2
BP	GO:0043217	myelin maintenance	2/71	16/18670	0.00165309567644543	0.00555678824958131	0.00234856281680869	AKT1/SOD1	2
BP	GO:0045623	negative regulation of T-helper cell differentiation	2/71	16/18670	0.00165309567644543	0.00555678824958131	0.00234856281680869	IL2/IL4R	2
BP	GO:0090335	regulation of brown fat cell differentiation	2/71	16/18670	0.00165309567644543	0.00555678824958131	0.00234856281680869	PTGS2/MAPK14	2
BP	GO:1902004	positive regulation of amyloid-beta formation	2/71	16/18670	0.00165309567644543	0.00555678824958131	0.00234856281680869	CASP3/IFNG	2
BP	GO:0002705	positive regulation of leukocyte mediated immunity	4/71	133/18670	0.00165356547305723	0.00555678824958131	0.00234856281680869	IL6/IL1B/IL2/IL4R	4
BP	GO:0010676	positive regulation of cellular carbohydrate metabolic process	3/71	62/18670	0.00169727761443731	0.00568631078948539	0.00240330519810786	AKT1/IGF2/BAD	3
BP	GO:0048857	neural nucleus development	3/71	62/18670	0.00169727761443731	0.00568631078948539	0.00240330519810786	BCL2/CALM1/MAOB	3
BP	GO:0070265	necrotic cell death	3/71	62/18670	0.00169727761443731	0.00568631078948539	0.00240330519810786	CD14/BAX/TP53	3
BP	GO:0001889	liver development	4/71	135/18670	0.00174652194013859	0.00584535740614337	0.00247052585746091	RELA/HMOX1/CYP1A1/PCNA	4
BP	GO:0006874	cellular calcium ion homeostasis	7/71	458/18670	0.00175579429109765	0.00587043683953621	0.0024811256179858	BCL2/BAX/F2/CALM1/ESR1/IL2/CXCL10	7
BP	GO:0043405	regulation of MAP kinase activity	6/71	337/18670	0.00176828351369525	0.00590621011659343	0.0024962451050993	PTPN1/MAPK14/MAPK1/SOD1/IL1B/CD40LG	6
BP	GO:0042982	amyloid precursor protein metabolic process	3/71	63/18670	0.00177731391023082	0.00591243538685657	0.00249887620018659	CASP3/ACHE/IFNG	3
BP	GO:0046622	positive regulation of organ growth	3/71	63/18670	0.00177731391023082	0.00591243538685657	0.00249887620018659	AKT1/MAPK14/MAPK1	3
BP	GO:0046637	regulation of alpha-beta T cell differentiation	3/71	63/18670	0.00177731391023082	0.00591243538685657	0.00249887620018659	IL2/IFNG/IL4R	3
BP	GO:2000401	regulation of lymphocyte migration	3/71	63/18670	0.00177731391023082	0.00591243538685657	0.00249887620018659	AKT1/CCL2/CXCL10	3
BP	GO:0046394	carboxylic acid biosynthetic process	7/71	462/18670	0.00184451758121038	0.00612452916178226	0.00258851710984418	PTGS2/CYP3A4/CYP1A1/TP53/IL1B/IFNG/ABAT	7
BP	GO:0045670	regulation of osteoclast differentiation	3/71	64/18670	0.00185967226111243	0.00612452916178226	0.00258851710984418	IFNG/CA2/CREB1	3
BP	GO:1900449	regulation of glutamate receptor signaling pathway	3/71	64/18670	0.00185967226111243	0.00612452916178226	0.00258851710984418	ADRB2/CCL2/IFNG	3
BP	GO:0016053	organic acid biosynthetic process	7/71	463/18670	0.00186723472195508	0.00612452916178226	0.00258851710984418	PTGS2/CYP3A4/CYP1A1/TP53/IL1B/IFNG/ABAT	7
BP	GO:0010715	regulation of extracellular matrix disassembly	2/71	17/18670	0.0018689093533075	0.00612452916178226	0.00258851710984418	IL6/DPP4	2
BP	GO:0015732	prostaglandin transport	2/71	17/18670	0.0018689093533075	0.00612452916178226	0.00258851710984418	NOS2/IL1B	2
BP	GO:0030540	female genitalia development	2/71	17/18670	0.0018689093533075	0.00612452916178226	0.00258851710984418	BAX/ESR1	2
BP	GO:0032740	positive regulation of interleukin-17 production	2/71	17/18670	0.0018689093533075	0.00612452916178226	0.00258851710984418	IL6/IL2	2
BP	GO:0033145	positive regulation of intracellular steroid hormone receptor signaling pathway	2/71	17/18670	0.0018689093533075	0.00612452916178226	0.00258851710984418	AR/PARP1	2
BP	GO:0035729	cellular response to hepatocyte growth factor stimulus	2/71	17/18670	0.0018689093533075	0.00612452916178226	0.00258851710984418	RELA/CREB1	2
BP	GO:0045725	positive regulation of glycogen biosynthetic process	2/71	17/18670	0.0018689093533075	0.00612452916178226	0.00258851710984418	AKT1/IGF2	2
BP	GO:0051818	disruption of cells of other organism involved in symbiotic interaction	2/71	17/18670	0.0018689093533075	0.00612452916178226	0.00258851710984418	F2/BAD	2
BP	GO:0070242	thymocyte apoptotic process	2/71	17/18670	0.0018689093533075	0.00612452916178226	0.00258851710984418	BAX/TP53	2
BP	GO:0071850	mitotic cell cycle arrest	2/71	17/18670	0.0018689093533075	0.00612452916178226	0.00258851710984418	CDKN1A/TP53	2
BP	GO:1904996	positive regulation of leukocyte adhesion to vascular endothelial cell	2/71	17/18670	0.0018689093533075	0.00612452916178226	0.00258851710984418	RELA/ICAM1	2
BP	GO:0061008	hepaticobiliary system development	4/71	138/18670	0.00189267552038245	0.00619625914410921	0.00261883360955174	RELA/HMOX1/CYP1A1/PCNA	4
BP	GO:0032729	positive regulation of interferon-gamma production	3/71	65/18670	0.00194437662542882	0.00635291372664861	0.0026850432815979	CD14/IL1B/IL2	3
BP	GO:0072678	T cell migration	3/71	65/18670	0.00194437662542882	0.00635291372664861	0.0026850432815979	ICAM1/CCL2/CXCL10	3
BP	GO:0060078	regulation of postsynaptic membrane potential	4/71	140/18670	0.00199469346571144	0.00650443521427643	0.00274908346376915	ADRB2/AKT1/PPP3CA/ABAT	4
BP	GO:0097553	calcium ion transmembrane import into cytosol	4/71	140/18670	0.00199469346571144	0.00650443521427643	0.00274908346376915	BAX/F2/CALM1/CXCL10	4
BP	GO:0009755	hormone-mediated signaling pathway	5/71	235/18670	0.00200708313958435	0.00653837547939622	0.00276342823291866	AR/ESR1/ESR2/RB1/PARP1	5
BP	GO:0055074	calcium ion homeostasis	7/71	471/18670	0.00205691633987537	0.00669410643154706	0.00282924753486439	BCL2/BAX/F2/CALM1/ESR1/IL2/CXCL10	7
BP	GO:0043122	regulation of I-kappaB kinase/NF-kappaB signaling	5/71	237/18670	0.00208252417524932	0.00674590491787019	0.00285114003705837	RELA/AKT1/HMOX1/ESR1/IL1B	5
BP	GO:0002902	regulation of B cell apoptotic process	2/71	18/18670	0.00209736316537419	0.00674590491787019	0.00285114003705837	BAX/IL2	2
BP	GO:0035994	response to muscle stretch	2/71	18/18670	0.00209736316537419	0.00674590491787019	0.00285114003705837	RELA/MAPK14	2
BP	GO:0045780	positive regulation of bone resorption	2/71	18/18670	0.00209736316537419	0.00674590491787019	0.00285114003705837	SPP1/CA2	2
BP	GO:0046852	positive regulation of bone remodeling	2/71	18/18670	0.00209736316537419	0.00674590491787019	0.00285114003705837	SPP1/CA2	2
BP	GO:0060749	mammary gland alveolus development	2/71	18/18670	0.00209736316537419	0.00674590491787019	0.00285114003705837	AR/ESR1	2
BP	GO:0061377	mammary gland lobule development	2/71	18/18670	0.00209736316537419	0.00674590491787019	0.00285114003705837	AR/ESR1	2
BP	GO:0070230	positive regulation of lymphocyte apoptotic process	2/71	18/18670	0.00209736316537419	0.00674590491787019	0.00285114003705837	BAX/TP53	2
BP	GO:0070875	positive regulation of glycogen metabolic process	2/71	18/18670	0.00209736316537419	0.00674590491787019	0.00285114003705837	AKT1/IGF2	2
BP	GO:0071318	cellular response to ATP	2/71	18/18670	0.00209736316537419	0.00674590491787019	0.00285114003705837	PTGS2/SOD1	2
BP	GO:0090026	positive regulation of monocyte chemotaxis	2/71	18/18670	0.00209736316537419	0.00674590491787019	0.00285114003705837	SERPINE1/CXCL10	2
BP	GO:0150078	positive regulation of neuroinflammatory response	2/71	18/18670	0.00209736316537419	0.00674590491787019	0.00285114003705837	IL6/IL1B	2
BP	GO:1900542	regulation of purine nucleotide metabolic process	4/71	142/18670	0.00210045922396549	0.00674928475081413	0.00285256851509688	NOS2/TP53/IFNG/PARP1	4
BP	GO:0050769	positive regulation of neurogenesis	7/71	474/18670	0.00213178290330959	0.00684327196587709	0.00289229197919845	IL6/BCL2/RELA/IL1B/IL2/IFNG/NFE2L2	7
BP	GO:0031056	regulation of histone modification	4/71	143/18670	0.00215476941740461	0.00689693411972376	0.00291497215586411	MAPK8/TP53/IL1B/IGF2	4
BP	GO:0106106	cold-induced thermogenesis	4/71	143/18670	0.00215476941740461	0.00689693411972376	0.00291497215586411	ADRB2/ACHE/RB1/IL4R	4
BP	GO:0120161	regulation of cold-induced thermogenesis	4/71	143/18670	0.00215476941740461	0.00689693411972376	0.00291497215586411	ADRB2/ACHE/RB1/IL4R	4
BP	GO:0010631	epithelial cell migration	6/71	351/18670	0.00216952471229535	0.00693743367303745	0.00293208919195363	PTGS2/DPP4/AKT1/HMOX1/IFNG/NFE2L2	6
BP	GO:0002449	lymphocyte mediated immunity	6/71	352/18670	0.00220061282007401	0.00703003127419578	0.00297122533917365	IL6/ICAM1/IL1B/IL2/CD40LG/IL4R	6
BP	GO:0031343	positive regulation of cell killing	3/71	68/18670	0.00221279998148465	0.00704169714455097	0.0029761558904402	NOS2/IFNG/BAD	3
BP	GO:0033627	cell adhesion mediated by integrin	3/71	68/18670	0.00221279998148465	0.00704169714455097	0.0029761558904402	DPP4/ICAM1/SERPINE1	3
BP	GO:0046323	glucose import	3/71	68/18670	0.00221279998148465	0.00704169714455097	0.0029761558904402	AKT1/MAPK14/NFE2L2	3
BP	GO:0071242	cellular response to ammonium ion	3/71	68/18670	0.00221279998148465	0.00704169714455097	0.0029761558904402	CASP3/MAPK1/CASP7	3
BP	GO:0038093	Fc receptor signaling pathway	5/71	241/18670	0.00223960284165414	0.00712012464109699	0.0030093030779756	CALM1/RELA/MAPK8/PPP3CA/MAPK1	5
BP	GO:0090132	epithelium migration	6/71	354/18670	0.00226379952206236	0.00719012360231549	0.00303888796589092	PTGS2/DPP4/AKT1/HMOX1/IFNG/NFE2L2	6
BP	GO:0002822	regulation of adaptive immune response based on somatic recombination of immune receptors built from immunoglobulin superfamily domains	4/71	145/18670	0.00226628803572542	0.00719110626720565	0.00303930328677751	IL6/IL1B/IL2/IL4R	4
BP	GO:0042698	ovulation cycle	3/71	69/18670	0.00230712080153484	0.00731363942849663	0.00309109162448422	CASP3/ESR1/PCNA	3
BP	GO:0006140	regulation of nucleotide metabolic process	4/71	146/18670	0.00232351384182482	0.00732124285394502	0.00309430519345364	NOS2/TP53/IFNG/PARP1	4
BP	GO:0002363	alpha-beta T cell lineage commitment	2/71	19/18670	0.00233836059638123	0.00732124285394502	0.00309430519345364	IL6/BCL2	2
BP	GO:0002726	positive regulation of T cell cytokine production	2/71	19/18670	0.00233836059638123	0.00732124285394502	0.00309430519345364	IL6/IL1B	2
BP	GO:0010523	negative regulation of calcium ion transport into cytosol	2/71	19/18670	0.00233836059638123	0.00732124285394502	0.00309430519345364	BCL2/CALM1	2
BP	GO:0010544	negative regulation of platelet activation	2/71	19/18670	0.00233836059638123	0.00732124285394502	0.00309430519345364	F2/ABAT	2
BP	GO:0015669	gas transport	2/71	19/18670	0.00233836059638123	0.00732124285394502	0.00309430519345364	MYC/CA2	2
BP	GO:0032026	response to magnesium ion	2/71	19/18670	0.00233836059638123	0.00732124285394502	0.00309430519345364	CD14/MDM2	2
BP	GO:0035728	response to hepatocyte growth factor	2/71	19/18670	0.00233836059638123	0.00732124285394502	0.00309430519345364	RELA/CREB1	2
BP	GO:0045076	regulation of interleukin-2 biosynthetic process	2/71	19/18670	0.00233836059638123	0.00732124285394502	0.00309430519345364	IL1B/IL1A	2
BP	GO:0060252	positive regulation of glial cell proliferation	2/71	19/18670	0.00233836059638123	0.00732124285394502	0.00309430519345364	IL6/IL1B	2
BP	GO:0060716	labyrinthine layer blood vessel development	2/71	19/18670	0.00233836059638123	0.00732124285394502	0.00309430519345364	AKT1/MAPK1	2
BP	GO:1901741	positive regulation of myoblast fusion	2/71	19/18670	0.00233836059638123	0.00732124285394502	0.00309430519345364	MAPK14/IL4R	2
BP	GO:1902176	negative regulation of oxidative stress-induced intrinsic apoptotic signaling pathway	2/71	19/18670	0.00233836059638123	0.00732124285394502	0.00309430519345364	AKT1/NFE2L2	2
BP	GO:0033077	T cell differentiation in thymus	3/71	70/18670	0.00240390206534214	0.00751931451718395	0.00317801969227073	BCL2/TP53/SOD1	3
BP	GO:0008643	carbohydrate transport	4/71	148/18670	0.00244094174394759	0.00762072635291111	0.0032208811539417	AKT1/MAPK14/IL1B/NFE2L2	4
BP	GO:0014065	phosphatidylinositol 3-kinase signaling	4/71	148/18670	0.00244094174394759	0.00762072635291111	0.0032208811539417	F2/AKT1/MAPK1/ERBB3	4
BP	GO:0090130	tissue migration	6/71	360/18670	0.00246161184974311	0.00767799537254466	0.00324508576351569	PTGS2/DPP4/AKT1/HMOX1/IFNG/NFE2L2	6
BP	GO:0002460	adaptive immune response based on somatic recombination of immune receptors built from immunoglobulin superfamily domains	6/71	361/18670	0.00249580868563023	0.00777088099806303	0.00328434364351946	IL6/ICAM1/IL1B/IL2/CD40LG/IL4R	6
BP	GO:0008277	regulation of G protein-coupled receptor signaling pathway	4/71	149/18670	0.00250116109311395	0.00777088099806303	0.00328434364351946	ADRB2/F2/CALM1/CXCL8	4
BP	GO:2001056	positive regulation of cysteine-type endopeptidase activity	4/71	149/18670	0.00250116109311395	0.00777088099806303	0.00328434364351946	BAX/MYC/CYCS/BAD	4
BP	GO:0042440	pigment metabolic process	3/71	71/18670	0.00250316560634576	0.00777088099806303	0.00328434364351946	BCL2/HMOX1/TYR	3
BP	GO:0042531	positive regulation of tyrosine phosphorylation of STAT protein	3/71	71/18670	0.00250316560634576	0.00777088099806303	0.00328434364351946	IL6/IL2/IFNG	3
BP	GO:0065004	protein-DNA complex assembly	5/71	248/18670	0.00253506133530982	0.00786250226176917	0.00332306714412891	ESR1/RB1/TP53/PARP1/CREB1	5
BP	GO:0048754	branching morphogenesis of an epithelial tube	4/71	150/18670	0.00256239550549807	0.0079398170592898	0.00335574405217193	BCL2/AR/ESR1/MYC	4
BP	GO:0045861	negative regulation of proteolysis	6/71	363/18670	0.00256527627594114	0.00794128678293222	0.00335636522723611	PTGS2/F2/AKT1/TP53/SERPINE1/MDM2	6
BP	GO:0032042	mitochondrial DNA metabolic process	2/71	20/18670	0.0025918056633615	0.00794146582088481	0.00335644089718417	TP53/PARP1	2
BP	GO:0032495	response to muramyl dipeptide	2/71	20/18670	0.0025918056633615	0.00794146582088481	0.00335644089718417	RELA/MAPK14	2
BP	GO:0042053	regulation of dopamine metabolic process	2/71	20/18670	0.0025918056633615	0.00794146582088481	0.00335644089718417	MAOB/ABAT	2
BP	GO:0042069	regulation of catecholamine metabolic process	2/71	20/18670	0.0025918056633615	0.00794146582088481	0.00335644089718417	MAOB/ABAT	2
BP	GO:0043369	CD4-positive or CD8-positive, alpha-beta T cell lineage commitment	2/71	20/18670	0.0025918056633615	0.00794146582088481	0.00335644089718417	IL6/BCL2	2
BP	GO:0043371	negative regulation of CD4-positive, alpha-beta T cell differentiation	2/71	20/18670	0.0025918056633615	0.00794146582088481	0.00335644089718417	IL2/IL4R	2
BP	GO:0051767	nitric-oxide synthase biosynthetic process	2/71	20/18670	0.0025918056633615	0.00794146582088481	0.00335644089718417	CCL2/IFNG	2
BP	GO:0051769	regulation of nitric-oxide synthase biosynthetic process	2/71	20/18670	0.0025918056633615	0.00794146582088481	0.00335644089718417	CCL2/IFNG	2
BP	GO:0071636	positive regulation of transforming growth factor beta production	2/71	20/18670	0.0025918056633615	0.00794146582088481	0.00335644089718417	PTGS2/CREB1	2
BP	GO:0097709	connective tissue replacement	2/71	20/18670	0.0025918056633615	0.00794146582088481	0.00335644089718417	PPP3CA/IL1A	2
BP	GO:1902993	positive regulation of amyloid precursor protein catabolic process	2/71	20/18670	0.0025918056633615	0.00794146582088481	0.00335644089718417	CASP3/IFNG	2
BP	GO:0050805	negative regulation of synaptic transmission	3/71	72/18670	0.00260493291358139	0.00796689398963724	0.00336718804984668	PTGS2/ACHE/IL1B	3
BP	GO:0051155	positive regulation of striated muscle cell differentiation	3/71	72/18670	0.00260493291358139	0.00796689398963724	0.00336718804984668	BCL2/MAPK14/IL4R	3
BP	GO:0016999	antibiotic metabolic process	4/71	151/18670	0.00262465355039846	0.00801235588928301	0.00338640240934609	CYP1A1/MAOB/SOD1/MPO	4
BP	GO:1903169	regulation of calcium ion transmembrane transport	4/71	151/18670	0.00262465355039846	0.00801235588928301	0.00338640240934609	BAX/F2/CALM1/CXCL10	4
BP	GO:0072503	cellular divalent inorganic cation homeostasis	7/71	493/18670	0.00265631942001466	0.00810152873017411	0.00342409109010549	BCL2/BAX/F2/CALM1/ESR1/IL2/CXCL10	7
BP	GO:0031100	animal organ regeneration	3/71	73/18670	0.0027092251344204	0.00822487851295983	0.00347622457086819	HMOX1/CDKN1A/PCNA	3
BP	GO:0033555	multicellular organismal response to stress	3/71	73/18670	0.0027092251344204	0.00822487851295983	0.00347622457086819	BCL2/DPP4/PPP3CA	3
BP	GO:0045685	regulation of glial cell differentiation	3/71	73/18670	0.0027092251344204	0.00822487851295983	0.00347622457086819	IL6/F2/RELA	3
BP	GO:0061844	antimicrobial humoral immune response mediated by antimicrobial peptide	3/71	73/18670	0.0027092251344204	0.00822487851295983	0.00347622457086819	F2/CXCL8/CXCL10	3
BP	GO:1903524	positive regulation of blood circulation	3/71	73/18670	0.0027092251344204	0.00822487851295983	0.00347622457086819	PTGS2/AKT1/ICAM1	3
BP	GO:2000027	regulation of animal organ morphogenesis	5/71	253/18670	0.00276279649969431	0.00837980555973456	0.00354170410419404	BCL2/BAX/AR/ESR1/MYC	5
BP	GO:0006909	phagocytosis	6/71	369/18670	0.00278244149338091	0.00843164088903305	0.00356361217798048	CD14/MAPK1/SOD1/IL1B/CCL2/IFNG	6
BP	GO:0005977	glycogen metabolic process	3/71	74/18670	0.00281606307729216	0.00849156244439925	0.00358893787522456	CALM1/AKT1/IGF2	3
BP	GO:0014015	positive regulation of gliogenesis	3/71	74/18670	0.00281606307729216	0.00849156244439925	0.00358893787522456	IL6/RELA/IL1B	3
BP	GO:0032677	regulation of interleukin-8 production	3/71	74/18670	0.00281606307729216	0.00849156244439925	0.00358893787522456	CD14/IL1B/SERPINE1	3
BP	GO:0099601	regulation of neurotransmitter receptor activity	3/71	74/18670	0.00281606307729216	0.00849156244439925	0.00358893787522456	ADRB2/CCL2/IFNG	3
BP	GO:1903036	positive regulation of response to wounding	3/71	74/18670	0.00281606307729216	0.00849156244439925	0.00358893787522456	F2/SERPINE1/NFE2L2	3
BP	GO:1990845	adaptive thermogenesis	4/71	154/18670	0.00281765481109612	0.00849156244439925	0.00358893787522456	ADRB2/ACHE/RB1/IL4R	4
BP	GO:0010893	positive regulation of steroid biosynthetic process	2/71	21/18670	0.00285760291407748	0.00854949194601604	0.003613421635876	IL1B/IFNG	2
BP	GO:0030728	ovulation	2/71	21/18670	0.00285760291407748	0.00854949194601604	0.003613421635876	PTGS2/IL4R	2
BP	GO:0032891	negative regulation of organic acid transport	2/71	21/18670	0.00285760291407748	0.00854949194601604	0.003613421635876	AKT1/ABAT	2
BP	GO:0035743	CD4-positive, alpha-beta T cell cytokine production	2/71	21/18670	0.00285760291407748	0.00854949194601604	0.003613421635876	IL6/IL1B	2
BP	GO:0051412	response to corticosterone	2/71	21/18670	0.00285760291407748	0.00854949194601604	0.003613421635876	MAOB/CDKN1A	2
BP	GO:0051900	regulation of mitochondrial depolarization	2/71	21/18670	0.00285760291407748	0.00854949194601604	0.003613421635876	BCL2/PARP1	2
BP	GO:0055093	response to hyperoxia	2/71	21/18670	0.00285760291407748	0.00854949194601604	0.003613421635876	CYP1A1/CDKN1A	2
BP	GO:1903055	positive regulation of extracellular matrix organization	2/71	21/18670	0.00285760291407748	0.00854949194601604	0.003613421635876	IL6/RB1	2
BP	GO:0060968	regulation of gene silencing	4/71	155/18670	0.00288409259245778	0.00861312719919518	0.00364031691832013	PPP3CA/ESR1/CDK2/TP53	4
BP	GO:1903707	negative regulation of hemopoiesis	4/71	155/18670	0.00288409259245778	0.00861312719919518	0.00364031691832013	MYC/IL2/NFE2L2/IL4R	4
BP	GO:0006839	mitochondrial transport	5/71	256/18670	0.00290636471890017	0.00867179346507283	0.00366511207056507	BCL2/BAX/MAPK8/TP53/BAD	5
BP	GO:0006073	cellular glucan metabolic process	3/71	75/18670	0.00292546721438934	0.00871303412227873	0.00368254233238256	CALM1/AKT1/IGF2	3
BP	GO:0044042	glucan metabolic process	3/71	75/18670	0.00292546721438934	0.00871303412227873	0.00368254233238256	CALM1/AKT1/IGF2	3
BP	GO:0030856	regulation of epithelial cell differentiation	4/71	156/18670	0.00295159648316403	0.00877501657156873	0.00370873906134882	IL1B/SERPINE1/IFNG/BAD	4
BP	GO:0043535	regulation of blood vessel endothelial cell migration	4/71	156/18670	0.00295159648316403	0.00877501657156873	0.00370873906134882	PTGS2/AKT1/HMOX1/NFE2L2	4
BP	GO:0042310	vasoconstriction	3/71	76/18670	0.00303745768435657	0.00901403809206537	0.00380976091610418	PTGS2/AKT1/ICAM1	3
BP	GO:0045454	cell redox homeostasis	3/71	76/18670	0.00303745768435657	0.00901403809206537	0.00380976091610418	NOS2/MPO/NFE2L2	3
BP	GO:0006582	melanin metabolic process	2/71	22/18670	0.00313565742446507	0.0092307488855796	0.00390135319725454	BCL2/TYR	2
BP	GO:0032069	regulation of nuclease activity	2/71	22/18670	0.00313565742446507	0.0092307488855796	0.00390135319725454	AKT1/PCNA	2
BP	GO:0032469	endoplasmic reticulum calcium ion homeostasis	2/71	22/18670	0.00313565742446507	0.0092307488855796	0.00390135319725454	BCL2/BAX	2
BP	GO:0042094	interleukin-2 biosynthetic process	2/71	22/18670	0.00313565742446507	0.0092307488855796	0.00390135319725454	IL1B/IL1A	2
BP	GO:0043496	regulation of protein homodimerization activity	2/71	22/18670	0.00313565742446507	0.0092307488855796	0.00390135319725454	BCL2/BAX	2
BP	GO:0044342	type B pancreatic cell proliferation	2/71	22/18670	0.00313565742446507	0.0092307488855796	0.00390135319725454	IGFBP3/BAD	2
BP	GO:0045663	positive regulation of myoblast differentiation	2/71	22/18670	0.00313565742446507	0.0092307488855796	0.00390135319725454	MAPK14/IGFBP3	2
BP	GO:0045723	positive regulation of fatty acid biosynthetic process	2/71	22/18670	0.00313565742446507	0.0092307488855796	0.00390135319725454	PTGS2/IL1B	2
BP	GO:0090312	positive regulation of protein deacetylation	2/71	22/18670	0.00313565742446507	0.0092307488855796	0.00390135319725454	TP53/IFNG	2
BP	GO:1901224	positive regulation of NIK/NF-kappaB signaling	3/71	77/18670	0.00315205429496227	0.00927074792635962	0.00391825869295901	CD14/RELA/IL1B	3
BP	GO:0002673	regulation of acute inflammatory response	4/71	159/18670	0.00316058885234134	0.00928757187241891	0.00392536929217067	IL6/PTGS2/F2/IL1B	4
BP	GO:0002819	regulation of adaptive immune response	4/71	160/18670	0.0032324410839235	0.00948182717950894	0.0040074708174958	IL6/IL1B/IL2/IL4R	4
BP	GO:0007519	skeletal muscle tissue development	4/71	160/18670	0.0032324410839235	0.00948182717950894	0.0040074708174958	BCL2/PPP3CA/MAPK14/RB1	4
BP	GO:0033143	regulation of intracellular steroid hormone receptor signaling pathway	3/71	78/18670	0.00326927652575396	0.00956437281470573	0.00404235852615154	AR/ESR1/PARP1	3
BP	GO:0072347	response to anesthetic	3/71	78/18670	0.00326927652575396	0.00956437281470573	0.00404235852615154	RELA/MDM2/ABAT	3
BP	GO:0090398	cellular senescence	3/71	78/18670	0.00326927652575396	0.00956437281470573	0.00404235852615154	MAPK14/CDKN1A/TP53	3
BP	GO:0031330	negative regulation of cellular catabolic process	5/71	264/18670	0.00331559160020139	0.0096827011333315	0.00409236969750055	BCL2/AKT1/HMOX1/MAPK14/TP53	5
BP	GO:0140014	mitotic nuclear division	5/71	264/18670	0.00331559160020139	0.0096827011333315	0.00409236969750055	RB1/IL1B/IL1A/CHEK2/IGF2	5
BP	GO:0000723	telomere maintenance	4/71	162/18670	0.00337947758994067	0.00985183396360795	0.00416385327010543	MAPK1/MYC/PARP1/PCNA	4
BP	GO:0015718	monocarboxylic acid transport	4/71	162/18670	0.00337947758994067	0.00985183396360795	0.00416385327010543	NOS2/AKT1/IL1B/ABAT	4
BP	GO:0055072	iron ion homeostasis	3/71	79/18670	0.00338914353069698	0.00987129183698149	0.00417207709218516	HMOX1/SOD1/MYC	3
BP	GO:0050995	negative regulation of lipid catabolic process	2/71	23/18670	0.00342587479608874	0.00991700598867793	0.00419139806539019	AKT1/IL1B	2
BP	GO:0051043	regulation of membrane protein ectodomain proteolysis	2/71	23/18670	0.00342587479608874	0.00991700598867793	0.00419139806539019	IL1B/IFNG	2
BP	GO:0051589	negative regulation of neurotransmitter transport	2/71	23/18670	0.00342587479608874	0.00991700598867793	0.00419139806539019	MAOB/ABAT	2
BP	GO:0051882	mitochondrial depolarization	2/71	23/18670	0.00342587479608874	0.00991700598867793	0.00419139806539019	BCL2/PARP1	2
BP	GO:0071157	negative regulation of cell cycle arrest	2/71	23/18670	0.00342587479608874	0.00991700598867793	0.00419139806539019	CHEK2/MDM2	2
BP	GO:0071294	cellular response to zinc ion	2/71	23/18670	0.00342587479608874	0.00991700598867793	0.00419139806539019	PARP1/CREB1	2
BP	GO:1902254	negative regulation of intrinsic apoptotic signaling pathway by p53 class mediator	2/71	23/18670	0.00342587479608874	0.00991700598867793	0.00419139806539019	BCL2/MDM2	2
BP	GO:0009165	nucleotide biosynthetic process	6/71	386/18670	0.00347303087075793	0.0100446992756364	0.004245367317454	PTGS2/NOS2/MAPK1/TP53/IFNG/PARP1	6
BP	GO:0006633	fatty acid biosynthetic process	4/71	164/18670	0.00353101185330431	0.0101945224111148	0.00430868969528775	PTGS2/CYP3A4/CYP1A1/IL1B	4
BP	GO:0007088	regulation of mitotic nuclear division	4/71	164/18670	0.00353101185330431	0.0101945224111148	0.00430868969528775	RB1/IL1B/IL1A/IGF2	4
BP	GO:0022898	regulation of transmembrane transporter activity	5/71	268/18670	0.00353509404591316	0.0101973866709033	0.00430990026760667	ADRB2/BCL2/CALM1/CCL2/IFNG	5
BP	GO:0071695	anatomical structure maturation	4/71	165/18670	0.00360848616906162	0.0104000038060291	0.00439553589887994	BCL2/CDKN1A/MMP2/RB1	4
BP	GO:0032204	regulation of telomere maintenance	3/71	81/18670	0.00363688686670512	0.0104272169071476	0.00440703744879444	MAPK1/MYC/PARP1	3
BP	GO:0032436	positive regulation of proteasomal ubiquitin-dependent protein catabolic process	3/71	81/18670	0.00363688686670512	0.0104272169071476	0.00440703744879444	AKT1/NFE2L2/MDM2	3
BP	GO:0033238	regulation of cellular amine metabolic process	3/71	81/18670	0.00363688686670512	0.0104272169071476	0.00440703744879444	MAOB/NQO1/ABAT	3
BP	GO:0110110	positive regulation of animal organ morphogenesis	3/71	81/18670	0.00363688686670512	0.0104272169071476	0.00440703744879444	BAX/AR/MYC	3
BP	GO:1902930	regulation of alcohol biosynthetic process	3/71	81/18670	0.00363688686670512	0.0104272169071476	0.00440703744879444	SOD1/IL1B/IFNG	3
BP	GO:2001021	negative regulation of response to DNA damage stimulus	3/71	81/18670	0.00363688686670512	0.0104272169071476	0.00440703744879444	BCL2/CHEK2/MDM2	3
BP	GO:0045165	cell fate commitment	5/71	270/18670	0.00364868434741012	0.0104519603701852	0.00441749521227925	IL6/BCL2/CASP3/AR/TP53	5
BP	GO:1901293	nucleoside phosphate biosynthetic process	6/71	390/18670	0.00365261320511412	0.0104541401360595	0.00441841648493743	PTGS2/NOS2/MAPK1/TP53/IFNG/PARP1	6
BP	GO:0001783	B cell apoptotic process	2/71	24/18670	0.00372816115360802	0.0106151266668736	0.00448645704421291	BAX/IL2	2
BP	GO:0042104	positive regulation of activated T cell proliferation	2/71	24/18670	0.00372816115360802	0.0106151266668736	0.00448645704421291	IL2/IGF2	2
BP	GO:0044346	fibroblast apoptotic process	2/71	24/18670	0.00372816115360802	0.0106151266668736	0.00448645704421291	TP53/MYC	2
BP	GO:0046639	negative regulation of alpha-beta T cell differentiation	2/71	24/18670	0.00372816115360802	0.0106151266668736	0.00448645704421291	IL2/IL4R	2
BP	GO:0071677	positive regulation of mononuclear cell migration	2/71	24/18670	0.00372816115360802	0.0106151266668736	0.00448645704421291	SERPINE1/CXCL10	2
BP	GO:2000209	regulation of anoikis	2/71	24/18670	0.00372816115360802	0.0106151266668736	0.00448645704421291	BCL2/CHEK2	2
BP	GO:1905954	positive regulation of lipid localization	3/71	82/18670	0.00376479990130933	0.010706922338383	0.00452525425784928	PON1/IL1B/SPP1	3
BP	GO:1901568	fatty acid derivative metabolic process	4/71	167/18670	0.00376688994995839	0.010706922338383	0.00452525425784928	PTGS2/PON1/CYP1A1/IL1B	4
BP	GO:0043542	endothelial cell migration	5/71	273/18670	0.00382396243041018	0.0108597900347277	0.00458986341180676	PTGS2/DPP4/AKT1/HMOX1/NFE2L2	5
BP	GO:0006260	DNA replication	5/71	274/18670	0.00388370981564279	0.0110199848595195	0.00465756935848911	ACHE/CDK2/TP53/CHEK2/PCNA	5
BP	GO:0042509	regulation of tyrosine phosphorylation of STAT protein	3/71	83/18670	0.0038954311223063	0.0110342684151165	0.00466360626795197	IL6/IL2/IFNG	3
BP	GO:2000106	regulation of leukocyte apoptotic process	3/71	83/18670	0.0038954311223063	0.0110342684151165	0.00466360626795197	BAX/TP53/IL2	3
BP	GO:0030307	positive regulation of cell growth	4/71	169/18670	0.00392995460378612	0.0111034676305601	0.00469285314529254	BCL2/F2/AKT1/IL2	4
BP	GO:0050728	negative regulation of inflammatory response	4/71	169/18670	0.00392995460378612	0.0111034676305601	0.00469285314529254	F2/RB1/SOD1/IL2	4
BP	GO:0060538	skeletal muscle organ development	4/71	169/18670	0.00392995460378612	0.0111034676305601	0.00469285314529254	BCL2/PPP3CA/MAPK14/RB1	4
BP	GO:0043154	negative regulation of cysteine-type endopeptidase activity involved in apoptotic process	3/71	84/18670	0.00402879809475974	0.0113338966605286	0.0047902434051676	PTGS2/AKT1/MDM2	3
BP	GO:0097756	negative regulation of blood vessel diameter	3/71	84/18670	0.00402879809475974	0.0113338966605286	0.0047902434051676	PTGS2/AKT1/ICAM1	3
BP	GO:1905897	regulation of response to endoplasmic reticulum stress	3/71	84/18670	0.00402879809475974	0.0113338966605286	0.0047902434051676	BAX/PTPN1/NFE2L2	3
BP	GO:0009404	toxin metabolic process	2/71	25/18670	0.00404242314225521	0.0113338966605286	0.0047902434051676	CYP1A1/NFE2L2	2
BP	GO:0050901	leukocyte tethering or rolling	2/71	25/18670	0.00404242314225521	0.0113338966605286	0.0047902434051676	SELE/VCAM1	2
BP	GO:0060444	branching involved in mammary gland duct morphogenesis	2/71	25/18670	0.00404242314225521	0.0113338966605286	0.0047902434051676	AR/ESR1	2
BP	GO:0090025	regulation of monocyte chemotaxis	2/71	25/18670	0.00404242314225521	0.0113338966605286	0.0047902434051676	SERPINE1/CXCL10	2
BP	GO:1900101	regulation of endoplasmic reticulum unfolded protein response	2/71	25/18670	0.00404242314225521	0.0113338966605286	0.0047902434051676	BAX/PTPN1	2
BP	GO:2000353	positive regulation of endothelial cell apoptotic process	2/71	25/18670	0.00404242314225521	0.0113338966605286	0.0047902434051676	CCL2/CD40LG	2
BP	GO:0010876	lipid localization	6/71	400/18670	0.00413182557129464	0.0115747235868186	0.00489202831021839	IL6/PON1/NOS2/AKT1/IL1B/SPP1	6
BP	GO:0006919	activation of cysteine-type endopeptidase activity involved in apoptotic process	3/71	86/18670	0.00430380800635809	0.012025881812855	0.00508270921914922	BAX/CYCS/BAD	3
BP	GO:0007260	tyrosine phosphorylation of STAT protein	3/71	86/18670	0.00430380800635809	0.012025881812855	0.00508270921914922	IL6/IL2/IFNG	3
BP	GO:0042446	hormone biosynthetic process	3/71	86/18670	0.00430380800635809	0.012025881812855	0.00508270921914922	CYP3A4/IL1B/IFNG	3
BP	GO:2001252	positive regulation of chromosome organization	4/71	174/18670	0.00435842858951944	0.0121145160954371	0.00512017027957071	MAPK1/RB1/TP53/IL1B	4
BP	GO:0022011	myelination in peripheral nervous system	2/71	26/18670	0.00436856792532429	0.0121145160954371	0.00512017027957071	AKT1/SOD1	2
BP	GO:0032292	peripheral nervous system axon ensheathment	2/71	26/18670	0.00436856792532429	0.0121145160954371	0.00512017027957071	AKT1/SOD1	2
BP	GO:0032800	receptor biosynthetic process	2/71	26/18670	0.00436856792532429	0.0121145160954371	0.00512017027957071	ACHE/IFNG	2
BP	GO:0035640	exploration behavior	2/71	26/18670	0.00436856792532429	0.0121145160954371	0.00512017027957071	DPP4/ABAT	2
BP	GO:0043567	regulation of insulin-like growth factor receptor signaling pathway	2/71	26/18670	0.00436856792532429	0.0121145160954371	0.00512017027957071	AR/IGFBP3	2
BP	GO:0060740	prostate gland epithelium morphogenesis	2/71	26/18670	0.00436856792532429	0.0121145160954371	0.00512017027957071	AR/ESR1	2
BP	GO:0072539	T-helper 17 cell differentiation	2/71	26/18670	0.00436856792532429	0.0121145160954371	0.00512017027957071	IL6/IL2	2
BP	GO:1903579	negative regulation of ATP metabolic process	2/71	26/18670	0.00436856792532429	0.0121145160954371	0.00512017027957071	TP53/PARP1	2
BP	GO:0043900	regulation of multi-organism process	6/71	405/18670	0.00438822715345936	0.0121588157904415	0.00513889343615153	BCL2/NOS2/IL1B/CXCL8/IFNG/BAD	6
BP	GO:0001892	embryonic placenta development	3/71	87/18670	0.00444548453525854	0.0122722328847844	0.00518682889069835	AKT1/MAPK1/IGF2	3
BP	GO:0051781	positive regulation of cell division	3/71	87/18670	0.00444548453525854	0.0122722328847844	0.00518682889069835	IL1B/IL1A/IGF2	3
BP	GO:0002695	negative regulation of leukocyte activation	4/71	175/18670	0.00444775470612186	0.0122722328847844	0.00518682889069835	CASP3/HMOX1/IL2/IL4R	4
BP	GO:0032200	telomere organization	4/71	175/18670	0.00444775470612186	0.0122722328847844	0.00518682889069835	MAPK1/MYC/PARP1/PCNA	4
BP	GO:0046165	alcohol biosynthetic process	4/71	175/18670	0.00444775470612186	0.0122722328847844	0.00518682889069835	CYP3A4/SOD1/IL1B/IFNG	4
BP	GO:0070098	chemokine-mediated signaling pathway	3/71	88/18670	0.00458996400013029	0.0126540360905848	0.00534819707177825	CCL2/CXCL8/CXCL10	3
BP	GO:0002825	regulation of T-helper 1 type immune response	2/71	27/18670	0.00470650318167103	0.0128891788377713	0.00544757957258276	IL1B/IL4R	2
BP	GO:0006706	steroid catabolic process	2/71	27/18670	0.00470650318167103	0.0128891788377713	0.00544757957258276	CYP3A4/SPP1	2
BP	GO:0009651	response to salt stress	2/71	27/18670	0.00470650318167103	0.0128891788377713	0.00544757957258276	BAX/TP53	2
BP	GO:0035902	response to immobilization stress	2/71	27/18670	0.00470650318167103	0.0128891788377713	0.00544757957258276	CYP1A1/MDM2	2
BP	GO:0046885	regulation of hormone biosynthetic process	2/71	27/18670	0.00470650318167103	0.0128891788377713	0.00544757957258276	IL1B/IFNG	2
BP	GO:0060143	positive regulation of syncytium formation by plasma membrane fusion	2/71	27/18670	0.00470650318167103	0.0128891788377713	0.00544757957258276	MAPK14/IL4R	2
BP	GO:1901623	regulation of lymphocyte chemotaxis	2/71	27/18670	0.00470650318167103	0.0128891788377713	0.00544757957258276	CCL2/CXCL10	2
BP	GO:2000191	regulation of fatty acid transport	2/71	27/18670	0.00470650318167103	0.0128891788377713	0.00544757957258276	AKT1/IL1B	2
BP	GO:0010950	positive regulation of endopeptidase activity	4/71	178/18670	0.00472313683432371	0.0129026089017121	0.00545325575590704	BAX/MYC/CYCS/BAD	4
BP	GO:0050821	protein stabilization	4/71	178/18670	0.00472313683432371	0.0129026089017121	0.00545325575590704	CDKN1A/TP53/CHEK2/CREB1	4
BP	GO:2001257	regulation of cation channel activity	4/71	178/18670	0.00472313683432371	0.0129026089017121	0.00545325575590704	ADRB2/CALM1/CCL2/IFNG	4
BP	GO:0051099	positive regulation of binding	4/71	179/18670	0.00481742464490694	0.0131492980382075	0.00555751830960925	PON1/RB1/IFNG/PARP1	4
BP	GO:0030641	regulation of cellular pH	3/71	90/18670	0.0048873955989796	0.0133182539030823	0.00562892708822458	BCL2/MAPK1/CA2	3
BP	GO:0042475	odontogenesis of dentin-containing tooth	3/71	90/18670	0.0048873955989796	0.0133182539030823	0.00562892708822458	BAX/SERPINE1/CA2	3
BP	GO:0043534	blood vessel endothelial cell migration	4/71	180/18670	0.00491297216967672	0.013365876471503	0.00564905464904035	PTGS2/AKT1/HMOX1/NFE2L2	4
BP	GO:0070613	regulation of protein processing	4/71	180/18670	0.00491297216967672	0.013365876471503	0.00564905464904035	F2/IL1B/SERPINE1/MDM2	4
BP	GO:0010632	regulation of epithelial cell migration	5/71	291/18670	0.00500494308675537	0.013587339121042	0.00574265529039257	PTGS2/AKT1/HMOX1/IFNG/NFE2L2	5
BP	GO:0010565	regulation of cellular ketone metabolic process	4/71	181/18670	0.00500978705168351	0.013587339121042	0.00574265529039257	PTGS2/AKT1/IL1B/NQO1	4
BP	GO:0048015	phosphatidylinositol-mediated signaling	4/71	181/18670	0.00500978705168351	0.013587339121042	0.00574265529039257	F2/AKT1/MAPK1/ERBB3	4
BP	GO:0001516	prostaglandin biosynthetic process	2/71	28/18670	0.00505613710322413	0.013587339121042	0.00574265529039257	PTGS2/IL1B	2
BP	GO:0036296	response to increased oxygen levels	2/71	28/18670	0.00505613710322413	0.013587339121042	0.00574265529039257	CYP1A1/CDKN1A	2
BP	GO:0042730	fibrinolysis	2/71	28/18670	0.00505613710322413	0.013587339121042	0.00574265529039257	F2/SERPINE1	2
BP	GO:0046457	prostanoid biosynthetic process	2/71	28/18670	0.00505613710322413	0.013587339121042	0.00574265529039257	PTGS2/IL1B	2
BP	GO:0060512	prostate gland morphogenesis	2/71	28/18670	0.00505613710322413	0.013587339121042	0.00574265529039257	AR/ESR1	2
BP	GO:0071168	protein localization to chromatin	2/71	28/18670	0.00505613710322413	0.013587339121042	0.00574265529039257	ESR1/RB1	2
BP	GO:1900543	negative regulation of purine nucleotide metabolic process	2/71	28/18670	0.00505613710322413	0.013587339121042	0.00574265529039257	TP53/PARP1	2
BP	GO:1902003	regulation of amyloid-beta formation	2/71	28/18670	0.00505613710322413	0.013587339121042	0.00574265529039257	CASP3/IFNG	2
BP	GO:1902932	positive regulation of alcohol biosynthetic process	2/71	28/18670	0.00505613710322413	0.013587339121042	0.00574265529039257	IL1B/IFNG	2
BP	GO:1903792	negative regulation of anion transport	2/71	28/18670	0.00505613710322413	0.013587339121042	0.00574265529039257	AKT1/ABAT	2
BP	GO:1904994	regulation of leukocyte adhesion to vascular endothelial cell	2/71	28/18670	0.00505613710322413	0.013587339121042	0.00574265529039257	RELA/ICAM1	2
BP	GO:2000108	positive regulation of leukocyte apoptotic process	2/71	28/18670	0.00505613710322413	0.013587339121042	0.00574265529039257	BAX/TP53	2
BP	GO:0061138	morphogenesis of a branching epithelium	4/71	182/18670	0.0051078768967525	0.013704059966897	0.00579198706734879	BCL2/AR/ESR1/MYC	4
BP	GO:1903317	regulation of protein maturation	4/71	182/18670	0.0051078768967525	0.013704059966897	0.00579198706734879	F2/IL1B/SERPINE1/MDM2	4
BP	GO:0045833	negative regulation of lipid metabolic process	3/71	92/18670	0.00519622756374663	0.0139184666886071	0.005882605538247	AKT1/SOD1/IL1B	3
BP	GO:2000117	negative regulation of cysteine-type endopeptidase activity	3/71	92/18670	0.00519622756374663	0.0139184666886071	0.005882605538247	PTGS2/AKT1/MDM2	3
BP	GO:0038061	NIK/NF-kappaB signaling	4/71	183/18670	0.00520724927314369	0.0139253829832854	0.0058855286930951	CD14/RELA/AKT1/IL1B	4
BP	GO:0043123	positive regulation of I-kappaB kinase/NF-kappaB signaling	4/71	183/18670	0.00520724927314369	0.0139253829832854	0.0058855286930951	RELA/AKT1/HMOX1/IL1B	4
BP	GO:0043409	negative regulation of MAPK cascade	4/71	184/18670	0.00530791171121787	0.0141716089377176	0.00598959548404333	AKT1/PTPN1/MYC/IL1B	4
BP	GO:0048017	inositol lipid-mediated signaling	4/71	184/18670	0.00530791171121787	0.0141716089377176	0.00598959548404333	F2/AKT1/MAPK1/ERBB3	4
BP	GO:0006476	protein deacetylation	3/71	93/18670	0.00535495638821798	0.0142676366283119	0.00603018135008397	MAPK8/TP53/IFNG	3
BP	GO:0046634	regulation of alpha-beta T cell activation	3/71	93/18670	0.00535495638821798	0.0142676366283119	0.00603018135008397	IL2/IFNG/IL4R	3
BP	GO:0046328	regulation of JNK cascade	4/71	185/18670	0.00540987170310885	0.0142676366283119	0.00603018135008397	AKT1/PTPN1/IL1B/CD40LG	4
BP	GO:1902275	regulation of chromatin organization	4/71	185/18670	0.00540987170310885	0.0142676366283119	0.00603018135008397	MAPK8/TP53/IL1B/IGF2	4
BP	GO:0000083	regulation of transcription involved in G1/S transition of mitotic cell cycle	2/71	29/18670	0.00541737839250751	0.0142676366283119	0.00603018135008397	RB1/PCNA	2
BP	GO:0005979	regulation of glycogen biosynthetic process	2/71	29/18670	0.00541737839250751	0.0142676366283119	0.00603018135008397	AKT1/IGF2	2
BP	GO:0007271	synaptic transmission, cholinergic	2/71	29/18670	0.00541737839250751	0.0142676366283119	0.00603018135008397	ACHE/NQO1	2
BP	GO:0010800	positive regulation of peptidyl-threonine phosphorylation	2/71	29/18670	0.00541737839250751	0.0142676366283119	0.00603018135008397	CALM1/MAPK1	2
BP	GO:0010962	regulation of glucan biosynthetic process	2/71	29/18670	0.00541737839250751	0.0142676366283119	0.00603018135008397	AKT1/IGF2	2
BP	GO:0014044	Schwann cell development	2/71	29/18670	0.00541737839250751	0.0142676366283119	0.00603018135008397	AKT1/SOD1	2
BP	GO:0031063	regulation of histone deacetylation	2/71	29/18670	0.00541737839250751	0.0142676366283119	0.00603018135008397	MAPK8/TP53	2
BP	GO:0044030	regulation of DNA methylation	2/71	29/18670	0.00541737839250751	0.0142676366283119	0.00603018135008397	MYC/PARP1	2
BP	GO:0045980	negative regulation of nucleotide metabolic process	2/71	29/18670	0.00541737839250751	0.0142676366283119	0.00603018135008397	TP53/PARP1	2
BP	GO:0071280	cellular response to copper ion	2/71	29/18670	0.00541737839250751	0.0142676366283119	0.00603018135008397	CYP1A1/NFE2L2	2
BP	GO:0072538	T-helper 17 type immune response	2/71	29/18670	0.00541737839250751	0.0142676366283119	0.00603018135008397	IL6/IL2	2
BP	GO:0072606	interleukin-8 secretion	2/71	29/18670	0.00541737839250751	0.0142676366283119	0.00603018135008397	CD14/NOS2	2
BP	GO:2000515	negative regulation of CD4-positive, alpha-beta T cell activation	2/71	29/18670	0.00541737839250751	0.0142676366283119	0.00603018135008397	IL2/IL4R	2
BP	GO:0019933	cAMP-mediated signaling	4/71	187/18670	0.00561771412381519	0.0147834582205663	0.00624819207089324	ADRB2/CALM1/AHR/CXCL10	4
BP	GO:0042116	macrophage activation	3/71	95/18670	0.00568111260330779	0.0149027596112207	0.00629861450872966	IL6/IFNG/IL4R	3
BP	GO:0050810	regulation of steroid biosynthetic process	3/71	95/18670	0.00568111260330779	0.0149027596112207	0.00629861450872966	SOD1/IL1B/IFNG	3
BP	GO:1903076	regulation of protein localization to plasma membrane	3/71	95/18670	0.00568111260330779	0.0149027596112207	0.00629861450872966	AR/AKT1/IFNG	3
BP	GO:2000060	positive regulation of ubiquitin-dependent protein catabolic process	3/71	95/18670	0.00568111260330779	0.0149027596112207	0.00629861450872966	AKT1/NFE2L2/MDM2	3
BP	GO:0048568	embryonic organ development	6/71	428/18670	0.0057220245219945	0.0149904106599624	0.0063356600077991	AKT1/MAPK1/TP53/SOD1/CXCL8/IGF2	6
BP	GO:0051783	regulation of nuclear division	4/71	188/18670	0.00572361134289473	0.0149904106599624	0.0063356600077991	RB1/IL1B/IL1A/IGF2	4
BP	GO:0000002	mitochondrial genome maintenance	2/71	30/18670	0.00579013626017356	0.0150808600304441	0.00637388821063429	TP53/PARP1	2
BP	GO:0002828	regulation of type 2 immune response	2/71	30/18670	0.00579013626017356	0.0150808600304441	0.00637388821063429	IL6/IL4R	2
BP	GO:0032743	positive regulation of interleukin-2 production	2/71	30/18670	0.00579013626017356	0.0150808600304441	0.00637388821063429	IL1B/IL1A	2
BP	GO:0043372	positive regulation of CD4-positive, alpha-beta T cell differentiation	2/71	30/18670	0.00579013626017356	0.0150808600304441	0.00637388821063429	IFNG/IL4R	2
BP	GO:0045940	positive regulation of steroid metabolic process	2/71	30/18670	0.00579013626017356	0.0150808600304441	0.00637388821063429	IL1B/IFNG	2
BP	GO:0048873	homeostasis of number of cells within a tissue	2/71	30/18670	0.00579013626017356	0.0150808600304441	0.00637388821063429	BCL2/BAX	2
BP	GO:0097421	liver regeneration	2/71	30/18670	0.00579013626017356	0.0150808600304441	0.00637388821063429	HMOX1/PCNA	2
BP	GO:0090305	nucleic acid phosphodiester bond hydrolysis	5/71	302/18670	0.00584279730389796	0.0151731724544109	0.00641290382841929	IL6/BAX/CASP3/PARP1/PCNA	5
BP	GO:0019217	regulation of fatty acid metabolic process	3/71	96/18670	0.00584856829151839	0.0151731724544109	0.00641290382841929	PTGS2/AKT1/IL1B	3
BP	GO:0048010	vascular endothelial growth factor receptor signaling pathway	3/71	96/18670	0.00584856829151839	0.0151731724544109	0.00641290382841929	PTPN1/MAPK14/IL1B	3
BP	GO:0097327	response to antineoplastic agent	3/71	96/18670	0.00584856829151839	0.0151731724544109	0.00641290382841929	HMOX1/ICAM1/PCNA	3
BP	GO:2001169	regulation of ATP biosynthetic process	3/71	96/18670	0.00584856829151839	0.0151731724544109	0.00641290382841929	TP53/IFNG/PARP1	3
BP	GO:0015908	fatty acid transport	3/71	97/18670	0.00601896076231286	0.0155419174613712	0.00656875299404048	NOS2/AKT1/IL1B	3
BP	GO:0051591	response to cAMP	3/71	97/18670	0.00601896076231286	0.0155419174613712	0.00656875299404048	RELA/AHR/TYR	3
BP	GO:0120162	positive regulation of cold-induced thermogenesis	3/71	97/18670	0.00601896076231286	0.0155419174613712	0.00656875299404048	ADRB2/ACHE/IL4R	3
BP	GO:1990868	response to chemokine	3/71	97/18670	0.00601896076231286	0.0155419174613712	0.00656875299404048	CCL2/CXCL8/CXCL10	3
BP	GO:1990869	cellular response to chemokine	3/71	97/18670	0.00601896076231286	0.0155419174613712	0.00656875299404048	CCL2/CXCL8/CXCL10	3
BP	GO:2001022	positive regulation of response to DNA damage stimulus	3/71	97/18670	0.00601896076231286	0.0155419174613712	0.00656875299404048	MYC/PARP1/PCNA	3
BP	GO:0046034	ATP metabolic process	5/71	305/18670	0.00608750910265671	0.0157066302101385	0.00663836843012234	TP53/IFNG/PARP1/CYCS/BAD	5
BP	GO:0002724	regulation of T cell cytokine production	2/71	31/18670	0.00617432042254736	0.0158562314353356	0.00670159701812431	IL6/IL1B	2
BP	GO:0010543	regulation of platelet activation	2/71	31/18670	0.00617432042254736	0.0158562314353356	0.00670159701812431	F2/ABAT	2
BP	GO:0043304	regulation of mast cell degranulation	2/71	31/18670	0.00617432042254736	0.0158562314353356	0.00670159701812431	HMOX1/IL4R	2
BP	GO:0043457	regulation of cellular respiration	2/71	31/18670	0.00617432042254736	0.0158562314353356	0.00670159701812431	NOS2/IFNG	2
BP	GO:0048710	regulation of astrocyte differentiation	2/71	31/18670	0.00617432042254736	0.0158562314353356	0.00670159701812431	IL6/F2	2
BP	GO:1902895	positive regulation of pri-miRNA transcription by RNA polymerase II	2/71	31/18670	0.00617432042254736	0.0158562314353356	0.00670159701812431	RELA/TP53	2
BP	GO:0002042	cell migration involved in sprouting angiogenesis	3/71	98/18670	0.00619230346362464	0.0158653737810259	0.00670546100792959	PTGS2/AKT1/HMOX1	3
BP	GO:0006885	regulation of pH	3/71	98/18670	0.00619230346362464	0.0158653737810259	0.00670546100792959	BCL2/MAPK1/CA2	3
BP	GO:0043473	pigmentation	3/71	98/18670	0.00619230346362464	0.0158653737810259	0.00670546100792959	BCL2/BAX/TYR	3
BP	GO:0002377	immunoglobulin production	4/71	193/18670	0.00627314976719504	0.0160600420727259	0.00678773708017919	IL6/IL2/CD40LG/IL4R	4
BP	GO:0002824	positive regulation of adaptive immune response based on somatic recombination of immune receptors built from immunoglobulin superfamily domains	3/71	100/18670	0.00654789197113255	0.0166644701209072	0.00704319710054292	IL6/IL1B/IL2	3
BP	GO:0007215	glutamate receptor signaling pathway	3/71	100/18670	0.00654789197113255	0.0166644701209072	0.00704319710054292	ADRB2/CCL2/IFNG	3
BP	GO:0060079	excitatory postsynaptic potential	3/71	100/18670	0.00654789197113255	0.0166644701209072	0.00704319710054292	ADRB2/AKT1/PPP3CA	3
BP	GO:0008210	estrogen metabolic process	2/71	32/18670	0.0065698410991819	0.0166644701209072	0.00704319710054292	CYP3A4/CYP1A1	2
BP	GO:0033006	regulation of mast cell activation involved in immune response	2/71	32/18670	0.0065698410991819	0.0166644701209072	0.00704319710054292	HMOX1/IL4R	2
BP	GO:0042311	vasodilation	2/71	32/18670	0.0065698410991819	0.0166644701209072	0.00704319710054292	ADRB2/SOD1	2
BP	GO:0042573	retinoic acid metabolic process	2/71	32/18670	0.0065698410991819	0.0166644701209072	0.00704319710054292	CYP3A4/CYP1A1	2
BP	GO:0045589	regulation of regulatory T cell differentiation	2/71	32/18670	0.0065698410991819	0.0166644701209072	0.00704319710054292	IL2/IFNG	2
BP	GO:0045987	positive regulation of smooth muscle contraction	2/71	32/18670	0.0065698410991819	0.0166644701209072	0.00704319710054292	PTGS2/ABAT	2
BP	GO:0048741	skeletal muscle fiber development	2/71	32/18670	0.0065698410991819	0.0166644701209072	0.00704319710054292	BCL2/PPP3CA	2
BP	GO:0051968	positive regulation of synaptic transmission, glutamatergic	2/71	32/18670	0.0065698410991819	0.0166644701209072	0.00704319710054292	PTGS2/CCL2	2
BP	GO:0060674	placenta blood vessel development	2/71	32/18670	0.0065698410991819	0.0166644701209072	0.00704319710054292	AKT1/MAPK1	2
BP	GO:0001763	morphogenesis of a branching structure	4/71	196/18670	0.00661917371319194	0.0167638321209005	0.00708519220420836	BCL2/AR/ESR1/MYC	4
BP	GO:0006694	steroid biosynthetic process	4/71	196/18670	0.00661917371319194	0.0167638321209005	0.00708519220420836	CYP3A4/SOD1/IL1B/IFNG	4
BP	GO:0032649	regulation of interferon-gamma production	3/71	101/18670	0.00673016330171489	0.0170318549813337	0.00719847140359398	CD14/IL1B/IL2	3
BP	GO:0009749	response to glucose	4/71	197/18670	0.00673727440067726	0.0170367858407931	0.00720055541915496	CASP3/ICAM1/PPP3CA/BAD	4
BP	GO:0000079	regulation of cyclin-dependent protein serine/threonine kinase activity	3/71	102/18670	0.00691543591616654	0.017473919236868	0.00738530876837323	CASP3/AKT1/CDKN1A	3
BP	GO:0006471	protein ADP-ribosylation	2/71	33/18670	0.00697660901042401	0.0174838778468662	0.00738951775027038	IFNG/PARP1	2
BP	GO:0014072	response to isoquinoline alkaloid	2/71	33/18670	0.00697660901042401	0.0174838778468662	0.00738951775027038	RELA/MDM2	2
BP	GO:0033028	myeloid cell apoptotic process	2/71	33/18670	0.00697660901042401	0.0174838778468662	0.00738951775027038	IL6/BCL2	2
BP	GO:0036003	positive regulation of transcription from RNA polymerase II promoter in response to stress	2/71	33/18670	0.00697660901042401	0.0174838778468662	0.00738951775027038	TP53/NFE2L2	2
BP	GO:0043278	response to morphine	2/71	33/18670	0.00697660901042401	0.0174838778468662	0.00738951775027038	RELA/MDM2	2
BP	GO:0045736	negative regulation of cyclin-dependent protein serine/threonine kinase activity	2/71	33/18670	0.00697660901042401	0.0174838778468662	0.00738951775027038	CASP3/CDKN1A	2
BP	GO:0051194	positive regulation of cofactor metabolic process	2/71	33/18670	0.00697660901042401	0.0174838778468662	0.00738951775027038	IFNG/NFE2L2	2
BP	GO:0060603	mammary gland duct morphogenesis	2/71	33/18670	0.00697660901042401	0.0174838778468662	0.00738951775027038	AR/ESR1	2
BP	GO:1901797	negative regulation of signal transduction by p53 class mediator	2/71	33/18670	0.00697660901042401	0.0174838778468662	0.00738951775027038	BCL2/MDM2	2
BP	GO:2001024	negative regulation of response to drug	2/71	33/18670	0.00697660901042401	0.0174838778468662	0.00738951775027038	NFE2L2/ABAT	2
BP	GO:0016052	carbohydrate catabolic process	4/71	199/18670	0.00697765670434022	0.0174838778468662	0.00738951775027038	CALM1/TP53/IFNG/BAD	4
BP	GO:0035601	protein deacylation	3/71	103/18670	0.00710372190467917	0.0177593047616979	0.0075059262549441	MAPK8/TP53/IFNG	3
BP	GO:0044264	cellular polysaccharide metabolic process	3/71	103/18670	0.00710372190467917	0.0177593047616979	0.0075059262549441	CALM1/AKT1/IGF2	3
BP	GO:1902106	negative regulation of leukocyte differentiation	3/71	103/18670	0.00710372190467917	0.0177593047616979	0.0075059262549441	MYC/IL2/IL4R	3
BP	GO:0019233	sensory perception of pain	3/71	104/18670	0.0072950330927148	0.0181962276689031	0.00769059064156193	PTGS2/MAPK1/CCL2	3
BP	GO:0098732	macromolecule deacylation	3/71	104/18670	0.0072950330927148	0.0181962276689031	0.00769059064156193	MAPK8/TP53/IFNG	3
BP	GO:1901800	positive regulation of proteasomal protein catabolic process	3/71	104/18670	0.0072950330927148	0.0181962276689031	0.00769059064156193	AKT1/NFE2L2/MDM2	3
BP	GO:0010922	positive regulation of phosphatase activity	2/71	34/18670	0.00739453537499137	0.0183473434116327	0.00775445933665498	CALM1/IFNG	2
BP	GO:0032892	positive regulation of organic acid transport	2/71	34/18670	0.00739453537499137	0.0183473434116327	0.00775445933665498	IL1B/ABAT	2
BP	GO:0034205	amyloid-beta formation	2/71	34/18670	0.00739453537499137	0.0183473434116327	0.00775445933665498	CASP3/IFNG	2
BP	GO:0043368	positive T cell selection	2/71	34/18670	0.00739453537499137	0.0183473434116327	0.00775445933665498	IL6/BCL2	2
BP	GO:0043516	regulation of DNA damage response, signal transduction by p53 class mediator	2/71	34/18670	0.00739453537499137	0.0183473434116327	0.00775445933665498	TP53/MDM2	2
BP	GO:0045066	regulatory T cell differentiation	2/71	34/18670	0.00739453537499137	0.0183473434116327	0.00775445933665498	IL2/IFNG	2
BP	GO:1904030	negative regulation of cyclin-dependent protein kinase activity	2/71	34/18670	0.00739453537499137	0.0183473434116327	0.00775445933665498	CASP3/CDKN1A	2
BP	GO:0002708	positive regulation of lymphocyte mediated immunity	3/71	105/18670	0.00748938104324499	0.0185408532953552	0.00783624581063656	IL6/IL1B/IL2	3
BP	GO:0002821	positive regulation of adaptive immune response	3/71	105/18670	0.00748938104324499	0.0185408532953552	0.00783624581063656	IL6/IL1B/IL2	3
BP	GO:0007009	plasma membrane organization	3/71	105/18670	0.00748938104324499	0.0185408532953552	0.00783624581063656	AR/AKT1/SOD1	3
BP	GO:0002456	T cell mediated immunity	3/71	106/18670	0.00768677705897585	0.0190010219435358	0.00803073495221211	IL6/ICAM1/IL1B	3
BP	GO:1904029	regulation of cyclin-dependent protein kinase activity	3/71	106/18670	0.00768677705897585	0.0190010219435358	0.00803073495221211	CASP3/AKT1/CDKN1A	3
BP	GO:0014904	myotube cell development	2/71	35/18670	0.00782353190756006	0.0192525393698346	0.00813703817066375	BCL2/PPP3CA	2
BP	GO:0042092	type 2 immune response	2/71	35/18670	0.00782353190756006	0.0192525393698346	0.00813703817066375	IL6/IL4R	2
BP	GO:0045622	regulation of T-helper cell differentiation	2/71	35/18670	0.00782353190756006	0.0192525393698346	0.00813703817066375	IL2/IL4R	2
BP	GO:0070873	regulation of glycogen metabolic process	2/71	35/18670	0.00782353190756006	0.0192525393698346	0.00813703817066375	AKT1/IGF2	2
BP	GO:1902991	regulation of amyloid precursor protein catabolic process	2/71	35/18670	0.00782353190756006	0.0192525393698346	0.00813703817066375	CASP3/IFNG	2
BP	GO:1904031	positive regulation of cyclin-dependent protein kinase activity	2/71	35/18670	0.00782353190756006	0.0192525393698346	0.00813703817066375	AKT1/CDKN1A	2
BP	GO:0001909	leukocyte mediated cytotoxicity	3/71	107/18670	0.00788723218455884	0.0193948332407185	0.00819717832342965	NOS2/F2/ICAM1	3
BP	GO:0030004	cellular monovalent inorganic cation homeostasis	3/71	108/18670	0.00809075720878744	0.0198656985037192	0.00839618836281592	BCL2/MAPK1/CA2	3
BP	GO:0046916	cellular transition metal ion homeostasis	3/71	108/18670	0.00809075720878744	0.0198656985037192	0.00839618836281592	HMOX1/SOD1/MYC	3
BP	GO:0001667	ameboidal-type cell migration	6/71	461/18670	0.00812546884987014	0.0199360945758896	0.00842594108869336	PTGS2/DPP4/AKT1/HMOX1/IFNG/NFE2L2	6
BP	GO:0019058	viral life cycle	5/71	328/18670	0.00820910222589614	0.020126327894099	0.00850634273036082	BCL2/DPP4/ICAM1/CCL2/CXCL8	5
BP	GO:0006007	glucose catabolic process	2/71	36/18670	0.00826351081636302	0.0201286771702549	0.0085073356461205	TP53/BAD	2
BP	GO:0030947	regulation of vascular endothelial growth factor receptor signaling pathway	2/71	36/18670	0.00826351081636302	0.0201286771702549	0.0085073356461205	PTPN1/IL1B	2
BP	GO:0045740	positive regulation of DNA replication	2/71	36/18670	0.00826351081636302	0.0201286771702549	0.0085073356461205	CDK2/PCNA	2
BP	GO:0051973	positive regulation of telomerase activity	2/71	36/18670	0.00826351081636302	0.0201286771702549	0.0085073356461205	MAPK1/MYC	2
BP	GO:0071634	regulation of transforming growth factor beta production	2/71	36/18670	0.00826351081636302	0.0201286771702549	0.0085073356461205	PTGS2/CREB1	2
BP	GO:0090322	regulation of superoxide metabolic process	2/71	36/18670	0.00826351081636302	0.0201286771702549	0.0085073356461205	SOD1/NFE2L2	2
BP	GO:2000310	regulation of NMDA receptor activity	2/71	36/18670	0.00826351081636302	0.0201286771702549	0.0085073356461205	CCL2/IFNG	2
BP	GO:2000516	positive regulation of CD4-positive, alpha-beta T cell activation	2/71	36/18670	0.00826351081636302	0.0201286771702549	0.0085073356461205	IFNG/IL4R	2
BP	GO:0051701	interaction with host	4/71	209/18670	0.00826495683808952	0.0201286771702549	0.0085073356461205	DPP4/ICAM1/CXCL8/BAD	4
BP	GO:0001676	long-chain fatty acid metabolic process	3/71	109/18670	0.00829736266677985	0.0201629578795092	0.00852182430314185	PTGS2/CYP3A4/CYP1A1	3
BP	GO:0006289	nucleotide-excision repair	3/71	109/18670	0.00829736266677985	0.0201629578795092	0.00852182430314185	TP53/PARP1/PCNA	3
BP	GO:0051149	positive regulation of muscle cell differentiation	3/71	109/18670	0.00829736266677985	0.0201629578795092	0.00852182430314185	BCL2/MAPK14/IL4R	3
BP	GO:0042742	defense response to bacterium	5/71	330/18670	0.00841502595225526	0.0204338378531585	0.00863631105436522	IL6/NOS2/F2/SERPINE1/MPO	5
BP	GO:0033559	unsaturated fatty acid metabolic process	3/71	110/18670	0.00850705884214769	0.0206421280728584	0.00872434440080936	PTGS2/CYP1A1/IL1B	3
BP	GO:0090150	establishment of protein localization to membrane	5/71	332/18670	0.00862451804062946	0.0209117630669193	0.00883830496448744	BCL2/BAX/MAPK8/TP53/BAD	5
BP	GO:0001662	behavioral fear response	2/71	37/18670	0.00871438480079909	0.0210193747539793	0.00888378677799765	BCL2/DPP4	2
BP	GO:0006296	nucleotide-excision repair, DNA incision, 5'-to lesion	2/71	37/18670	0.00871438480079909	0.0210193747539793	0.00888378677799765	PARP1/PCNA	2
BP	GO:0030212	hyaluronan metabolic process	2/71	37/18670	0.00871438480079909	0.0210193747539793	0.00888378677799765	AKT1/IL1B	2
BP	GO:0032885	regulation of polysaccharide biosynthetic process	2/71	37/18670	0.00871438480079909	0.0210193747539793	0.00888378677799765	AKT1/IGF2	2
BP	GO:0045923	positive regulation of fatty acid metabolic process	2/71	37/18670	0.00871438480079909	0.0210193747539793	0.00888378677799765	PTGS2/IL1B	2
BP	GO:0090050	positive regulation of cell migration involved in sprouting angiogenesis	2/71	37/18670	0.00871438480079909	0.0210193747539793	0.00888378677799765	PTGS2/HMOX1	2
BP	GO:0022037	metencephalon development	3/71	111/18670	0.00871985576915082	0.0210193747539793	0.00888378677799765	BCL2/TP53/ABAT	3
BP	GO:0031623	receptor internalization	3/71	111/18670	0.00871985576915082	0.0210193747539793	0.00888378677799765	ACHE/SELE/CXCL8	3
BP	GO:0042303	molting cycle	3/71	112/18670	0.0089357632348384	0.0214770711398155	0.00907723102400497	PTGS2/BCL2/RELA	3
BP	GO:0042633	hair cycle	3/71	112/18670	0.0089357632348384	0.0214770711398155	0.00907723102400497	PTGS2/BCL2/RELA	3
BP	GO:0050868	negative regulation of T cell activation	3/71	112/18670	0.0089357632348384	0.0214770711398155	0.00907723102400497	CASP3/IL2/IL4R	3
BP	GO:0051817	modification of morphology or physiology of other organism involved in symbiotic interaction	3/71	112/18670	0.0089357632348384	0.0214770711398155	0.00907723102400497	F2/CALM1/BAD	3
BP	GO:0009205	purine ribonucleoside triphosphate metabolic process	5/71	335/18670	0.00894551278913057	0.0214848560437634	0.00908052129441355	TP53/IFNG/PARP1/CYCS/BAD	5
BP	GO:0019935	cyclic-nucleotide-mediated signaling	4/71	215/18670	0.00910754879478584	0.0218005912612486	0.00921396600355804	ADRB2/CALM1/AHR/CXCL10	4
BP	GO:0032609	interferon-gamma production	3/71	113/18670	0.00915479078117621	0.0218005912612486	0.00921396600355804	CD14/IL1B/IL2	3
BP	GO:0048640	negative regulation of developmental growth	3/71	113/18670	0.00915479078117621	0.0218005912612486	0.00921396600355804	ADRB2/CDKN1A/SPP1	3
BP	GO:0060964	regulation of gene silencing by miRNA	3/71	113/18670	0.00915479078117621	0.0218005912612486	0.00921396600355804	PPP3CA/ESR1/TP53	3
BP	GO:0002209	behavioral defense response	2/71	38/18670	0.00917606704905284	0.0218005912612486	0.00921396600355804	BCL2/DPP4	2
BP	GO:0006778	porphyrin-containing compound metabolic process	2/71	38/18670	0.00917606704905284	0.0218005912612486	0.00921396600355804	HMOX1/CYP1A1	2
BP	GO:0007223	Wnt signaling pathway, calcium modulating pathway	2/71	38/18670	0.00917606704905284	0.0218005912612486	0.00921396600355804	CALM1/PPP3CA	2
BP	GO:0016572	histone phosphorylation	2/71	38/18670	0.00917606704905284	0.0218005912612486	0.00921396600355804	CDK2/IL1B	2
BP	GO:0032350	regulation of hormone metabolic process	2/71	38/18670	0.00917606704905284	0.0218005912612486	0.00921396600355804	IL1B/IFNG	2
BP	GO:0046636	negative regulation of alpha-beta T cell activation	2/71	38/18670	0.00917606704905284	0.0218005912612486	0.00921396600355804	IL2/IL4R	2
BP	GO:0048246	macrophage chemotaxis	2/71	38/18670	0.00917606704905284	0.0218005912612486	0.00921396600355804	MAPK14/CCL2	2
BP	GO:0060045	positive regulation of cardiac muscle cell proliferation	2/71	38/18670	0.00917606704905284	0.0218005912612486	0.00921396600355804	MAPK14/MAPK1	2
BP	GO:0060416	response to growth hormone	2/71	38/18670	0.00917606704905284	0.0218005912612486	0.00921396600355804	AKT1/PTPN1	2
BP	GO:0071604	transforming growth factor beta production	2/71	38/18670	0.00917606704905284	0.0218005912612486	0.00921396600355804	PTGS2/CREB1	2
BP	GO:1904706	negative regulation of vascular smooth muscle cell proliferation	2/71	38/18670	0.00917606704905284	0.0218005912612486	0.00921396600355804	HMOX1/CDKN1A	2
BP	GO:0005976	polysaccharide metabolic process	3/71	114/18670	0.00937694770716034	0.0222298329264577	0.00939538393223491	CALM1/AKT1/IGF2	3
BP	GO:0030218	erythrocyte differentiation	3/71	114/18670	0.00937694770716034	0.0222298329264577	0.00939538393223491	CASP3/MAPK14/RB1	3
BP	GO:0042752	regulation of circadian rhythm	3/71	114/18670	0.00937694770716034	0.0222298329264577	0.00939538393223491	MAPK8/TP53/CREB1	3
BP	GO:0009167	purine ribonucleoside monophosphate metabolic process	5/71	340/18670	0.0094987706618873	0.0225024717761867	0.00951061406808529	TP53/IFNG/PARP1/CYCS/BAD	5
BP	GO:1904375	regulation of protein localization to cell periphery	3/71	115/18670	0.00960224307091725	0.0227103816532754	0.00959848666366502	AR/AKT1/IFNG	3
BP	GO:0009126	purine nucleoside monophosphate metabolic process	5/71	341/18670	0.00961219556210464	0.0227103816532754	0.00959848666366502	TP53/IFNG/PARP1/CYCS/BAD	5
BP	GO:0009199	ribonucleoside triphosphate metabolic process	5/71	341/18670	0.00961219556210464	0.0227103816532754	0.00959848666366502	TP53/IFNG/PARP1/CYCS/BAD	5
BP	GO:0002251	organ or tissue specific immune response	2/71	39/18670	0.00964847123572486	0.0227103816532754	0.00959848666366502	IL6/NOS2	2
BP	GO:0007257	activation of JUN kinase activity	2/71	39/18670	0.00964847123572486	0.0227103816532754	0.00959848666366502	PTPN1/CD40LG	2
BP	GO:0010661	positive regulation of muscle cell apoptotic process	2/71	39/18670	0.00964847123572486	0.0227103816532754	0.00959848666366502	TP53/IFNG	2
BP	GO:0033683	nucleotide-excision repair, DNA incision	2/71	39/18670	0.00964847123572486	0.0227103816532754	0.00959848666366502	PARP1/PCNA	2
BP	GO:0042769	DNA damage response, detection of DNA damage	2/71	39/18670	0.00964847123572486	0.0227103816532754	0.00959848666366502	PARP1/PCNA	2
BP	GO:0045911	positive regulation of DNA recombination	2/71	39/18670	0.00964847123572486	0.0227103816532754	0.00959848666366502	IL2/PARP1	2
BP	GO:0048762	mesenchymal cell differentiation	4/71	219/18670	0.00969937912609269	0.0228139352217433	0.00964225332338434	IL6/BCL2/MAPK1/IL1B	4
BP	GO:0009144	purine nucleoside triphosphate metabolic process	5/71	342/18670	0.00972655347797247	0.0228615573200208	0.00966238068549522	TP53/IFNG/PARP1/CYCS/BAD	5
BP	GO:0060147	regulation of posttranscriptional gene silencing	3/71	117/18670	0.0100622841524133	0.0236002400163212	0.00997458310099702	PPP3CA/ESR1/TP53	3
BP	GO:0060966	regulation of gene silencing by RNA	3/71	117/18670	0.0100622841524133	0.0236002400163212	0.00997458310099702	PPP3CA/ESR1/TP53	3
BP	GO:1901222	regulation of NIK/NF-kappaB signaling	3/71	117/18670	0.0100622841524133	0.0236002400163212	0.00997458310099702	CD14/RELA/IL1B	3
BP	GO:0034248	regulation of cellular amide metabolic process	6/71	483/18670	0.0100873569358446	0.0236422428183858	0.00999233548145492	IL6/CASP3/AKT1/MAPK1/IFNG/NFE2L2	6
BP	GO:0002369	T cell cytokine production	2/71	40/18670	0.0101315115194727	0.0236617041856051	0.0100005607801999	IL6/IL1B	2
BP	GO:0002823	negative regulation of adaptive immune response based on somatic recombination of immune receptors built from immunoglobulin superfamily domains	2/71	40/18670	0.0101315115194727	0.0236617041856051	0.0100005607801999	IL2/IL4R	2
BP	GO:0008156	negative regulation of DNA replication	2/71	40/18670	0.0101315115194727	0.0236617041856051	0.0100005607801999	TP53/CHEK2	2
BP	GO:0042596	fear response	2/71	40/18670	0.0101315115194727	0.0236617041856051	0.0100005607801999	BCL2/DPP4	2
BP	GO:0071548	response to dexamethasone	2/71	40/18670	0.0101315115194727	0.0236617041856051	0.0100005607801999	ICAM1/PCNA	2
BP	GO:0051193	regulation of cofactor metabolic process	3/71	119/18670	0.0105349817522398	0.0245865910766558	0.0103914619382995	TP53/IFNG/NFE2L2	3
BP	GO:0010955	negative regulation of protein processing	2/71	41/18670	0.0106251025406624	0.0247095407922381	0.0104434263316477	SERPINE1/MDM2	2
BP	GO:0042572	retinol metabolic process	2/71	41/18670	0.0106251025406624	0.0247095407922381	0.0104434263316477	CYP3A4/CYP1A1	2
BP	GO:0061028	establishment of endothelial barrier	2/71	41/18670	0.0106251025406624	0.0247095407922381	0.0104434263316477	ICAM1/IL1B	2
BP	GO:1902893	regulation of pri-miRNA transcription by RNA polymerase II	2/71	41/18670	0.0106251025406624	0.0247095407922381	0.0104434263316477	RELA/TP53	2
BP	GO:1903318	negative regulation of protein maturation	2/71	41/18670	0.0106251025406624	0.0247095407922381	0.0104434263316477	SERPINE1/MDM2	2
BP	GO:0002698	negative regulation of immune effector process	3/71	120/18670	0.0107760968916335	0.0250254185379244	0.010576931279984	HMOX1/IL2/IL4R	3
BP	GO:1903052	positive regulation of proteolysis involved in cellular protein catabolic process	3/71	120/18670	0.0107760968916335	0.0250254185379244	0.010576931279984	AKT1/NFE2L2/MDM2	3
BP	GO:0043618	regulation of transcription from RNA polymerase II promoter in response to stress	3/71	121/18670	0.0110203998752111	0.0255747676428949	0.0108091123211597	HMOX1/TP53/NFE2L2	3
BP	GO:0006284	base-excision repair	2/71	42/18670	0.0111291594190301	0.0257366685934122	0.0108775393576623	TP53/PCNA	2
BP	GO:0006509	membrane protein ectodomain proteolysis	2/71	42/18670	0.0111291594190301	0.0257366685934122	0.0108775393576623	IL1B/IFNG	2
BP	GO:0010613	positive regulation of cardiac muscle hypertrophy	2/71	42/18670	0.0111291594190301	0.0257366685934122	0.0108775393576623	PPP3CA/PARP1	2
BP	GO:0010907	positive regulation of glucose metabolic process	2/71	42/18670	0.0111291594190301	0.0257366685934122	0.0108775393576623	AKT1/IGF2	2
BP	GO:0033003	regulation of mast cell activation	2/71	42/18670	0.0111291594190301	0.0257366685934122	0.0108775393576623	HMOX1/IL4R	2
BP	GO:0009161	ribonucleoside monophosphate metabolic process	5/71	354/18670	0.0111729402170397	0.0258198198292935	0.0109126830219502	TP53/IFNG/PARP1/CYCS/BAD	5
BP	GO:0019079	viral genome replication	3/71	122/18670	0.01126789813269	0.0259665250264503	0.0109746876108602	BCL2/CCL2/CXCL8	3
BP	GO:0019730	antimicrobial humoral response	3/71	122/18670	0.01126789813269	0.0259665250264503	0.0109746876108602	F2/CXCL8/CXCL10	3
BP	GO:0032434	regulation of proteasomal ubiquitin-dependent protein catabolic process	3/71	122/18670	0.01126789813269	0.0259665250264503	0.0109746876108602	AKT1/NFE2L2/MDM2	3
BP	GO:1903578	regulation of ATP metabolic process	3/71	122/18670	0.01126789813269	0.0259665250264503	0.0109746876108602	TP53/IFNG/PARP1	3
BP	GO:0010594	regulation of endothelial cell migration	4/71	229/18670	0.0112871192561391	0.0259926682102295	0.0109857369628562	PTGS2/AKT1/HMOX1/NFE2L2	4
BP	GO:0006692	prostanoid metabolic process	2/71	43/18670	0.0116435977513547	0.0266277703253434	0.0112541613017799	PTGS2/IL1B	2
BP	GO:0006693	prostaglandin metabolic process	2/71	43/18670	0.0116435977513547	0.0266277703253434	0.0112541613017799	PTGS2/IL1B	2
BP	GO:0010863	positive regulation of phospholipase C activity	2/71	43/18670	0.0116435977513547	0.0266277703253434	0.0112541613017799	SELE/ESR1	2
BP	GO:0014742	positive regulation of muscle hypertrophy	2/71	43/18670	0.0116435977513547	0.0266277703253434	0.0112541613017799	PPP3CA/PARP1	2
BP	GO:0021762	substantia nigra development	2/71	43/18670	0.0116435977513547	0.0266277703253434	0.0112541613017799	CALM1/MAOB	2
BP	GO:0032881	regulation of polysaccharide metabolic process	2/71	43/18670	0.0116435977513547	0.0266277703253434	0.0112541613017799	AKT1/IGF2	2
BP	GO:0033173	calcineurin-NFAT signaling cascade	2/71	43/18670	0.0116435977513547	0.0266277703253434	0.0112541613017799	PPP3CA/ERBB3	2
BP	GO:0042088	T-helper 1 type immune response	2/71	43/18670	0.0116435977513547	0.0266277703253434	0.0112541613017799	IL1B/IL4R	2
BP	GO:0050850	positive regulation of calcium-mediated signaling	2/71	43/18670	0.0116435977513547	0.0266277703253434	0.0112541613017799	CALM1/ERBB3	2
BP	GO:0051602	response to electrical stimulus	2/71	43/18670	0.0116435977513547	0.0266277703253434	0.0112541613017799	CD14/NQO1	2
BP	GO:0002446	neutrophil mediated immunity	6/71	499/18670	0.0117123270556508	0.0267478749367803	0.0113049232188944	IL6/CD14/F2/MAPK14/MAPK1/MPO	6
BP	GO:0010975	regulation of neuron projection development	6/71	499/18670	0.0117123270556508	0.0267478749367803	0.0113049232188944	AKT1/PPP3CA/IL2/NFE2L2/SPP1/MDM2	6
BP	GO:0014066	regulation of phosphatidylinositol 3-kinase signaling	3/71	124/18670	0.0117725090674602	0.0268296132062283	0.0113394696964123	F2/MAPK1/ERBB3	3
BP	GO:0019218	regulation of steroid metabolic process	3/71	124/18670	0.0117725090674602	0.0268296132062283	0.0113394696964123	SOD1/IL1B/IFNG	3
BP	GO:0046717	acid secretion	3/71	124/18670	0.0117725090674602	0.0268296132062283	0.0113394696964123	NOS2/IL1B/ABAT	3
BP	GO:0006936	muscle contraction	5/71	360/18670	0.0119486431390349	0.0272122307514252	0.011501182056025	PTGS2/ADRB2/CALM1/SOD1/ABAT	5
BP	GO:0048738	cardiac muscle tissue development	4/71	233/18670	0.0119664441244652	0.0272339762832657	0.0115103727513005	MAPK14/MAPK1/ERBB3/CREB1	4
BP	GO:0003197	endocardial cushion development	2/71	44/18670	0.0121683336091406	0.0275793275481896	0.0116563346096814	ERBB3/MDM2	2
BP	GO:0030225	macrophage differentiation	2/71	44/18670	0.0121683336091406	0.0275793275481896	0.0116563346096814	RB1/PARP1	2
BP	GO:0032965	regulation of collagen biosynthetic process	2/71	44/18670	0.0121683336091406	0.0275793275481896	0.0116563346096814	IL6/F2	2
BP	GO:0042987	amyloid precursor protein catabolic process	2/71	44/18670	0.0121683336091406	0.0275793275481896	0.0116563346096814	CASP3/IFNG	2
BP	GO:0070266	necroptotic process	2/71	44/18670	0.0121683336091406	0.0275793275481896	0.0116563346096814	CD14/TP53	2
BP	GO:0071622	regulation of granulocyte chemotaxis	2/71	44/18670	0.0121683336091406	0.0275793275481896	0.0116563346096814	MAPK14/CXCL8	2
BP	GO:0009141	nucleoside triphosphate metabolic process	5/71	362/18670	0.0122151758046157	0.0276664928999533	0.0116931748301238	TP53/IFNG/PARP1/CYCS/BAD	5
BP	GO:0046031	ADP metabolic process	3/71	126/18670	0.0122899846782859	0.0278168377492067	0.0117567177089949	TP53/IFNG/BAD	3
BP	GO:0006869	lipid transport	5/71	365/18670	0.0126225356756558	0.0285499436118329	0.0120665630895306	PON1/NOS2/AKT1/IL1B/SPP1	5
BP	GO:0001974	blood vessel remodeling	2/71	45/18670	0.0127032835363105	0.0286149048940783	0.0120940188148816	BAX/MDM2	2
BP	GO:0002820	negative regulation of adaptive immune response	2/71	45/18670	0.0127032835363105	0.0286149048940783	0.0120940188148816	IL2/IL4R	2
BP	GO:0032309	icosanoid secretion	2/71	45/18670	0.0127032835363105	0.0286149048940783	0.0120940188148816	NOS2/IL1B	2
BP	GO:0032570	response to progesterone	2/71	45/18670	0.0127032835363105	0.0286149048940783	0.0120940188148816	RELA/BAD	2
BP	GO:0045581	negative regulation of T cell differentiation	2/71	45/18670	0.0127032835363105	0.0286149048940783	0.0120940188148816	IL2/IL4R	2
BP	GO:1900274	regulation of phospholipase C activity	2/71	45/18670	0.0127032835363105	0.0286149048940783	0.0120940188148816	SELE/ESR1	2
BP	GO:0034763	negative regulation of transmembrane transport	3/71	128/18670	0.012820376449116	0.0288589647217481	0.0121971700977085	CALM1/AKT1/IL1B	3
BP	GO:0030258	lipid modification	4/71	238/18670	0.0128519192819443	0.0289102478734943	0.0122188447950175	AKT1/CYP3A4/CYP1A1/MAPK14	4
BP	GO:0031348	negative regulation of defense response	4/71	239/18670	0.0130339090614666	0.0292996593343595	0.0123834285862923	F2/RB1/SOD1/IL2	4
BP	GO:0050853	B cell receptor signaling pathway	3/71	129/18670	0.0130904310419427	0.0294066864795173	0.0124286633446126	BCL2/BAX/MAPK1	3
BP	GO:0005978	glycogen biosynthetic process	2/71	46/18670	0.0132483645469089	0.0295402723005402	0.0124851230616318	AKT1/IGF2	2
BP	GO:0009250	glucan biosynthetic process	2/71	46/18670	0.0132483645469089	0.0295402723005402	0.0124851230616318	AKT1/IGF2	2
BP	GO:0022602	ovulation cycle process	2/71	46/18670	0.0132483645469089	0.0295402723005402	0.0124851230616318	CASP3/ESR1	2
BP	GO:0030810	positive regulation of nucleotide biosynthetic process	2/71	46/18670	0.0132483645469089	0.0295402723005402	0.0124851230616318	NOS2/IFNG	2
BP	GO:0033628	regulation of cell adhesion mediated by integrin	2/71	46/18670	0.0132483645469089	0.0295402723005402	0.0124851230616318	DPP4/SERPINE1	2
BP	GO:0043300	regulation of leukocyte degranulation	2/71	46/18670	0.0132483645469089	0.0295402723005402	0.0124851230616318	HMOX1/IL4R	2
BP	GO:0060711	labyrinthine layer development	2/71	46/18670	0.0132483645469089	0.0295402723005402	0.0124851230616318	AKT1/MAPK1	2
BP	GO:0097720	calcineurin-mediated signaling	2/71	46/18670	0.0132483645469089	0.0295402723005402	0.0124851230616318	PPP3CA/ERBB3	2
BP	GO:1900373	positive regulation of purine nucleotide biosynthetic process	2/71	46/18670	0.0132483645469089	0.0295402723005402	0.0124851230616318	NOS2/IFNG	2
BP	GO:1904738	vascular associated smooth muscle cell migration	2/71	46/18670	0.0132483645469089	0.0295402723005402	0.0124851230616318	NFE2L2/MDM2	2
BP	GO:1904752	regulation of vascular associated smooth muscle cell migration	2/71	46/18670	0.0132483645469089	0.0295402723005402	0.0124851230616318	NFE2L2/MDM2	2
BP	GO:0042593	glucose homeostasis	4/71	241/18670	0.0134028239736151	0.0298644963625455	0.0126221555599275	AKT1/ICAM1/PPP3CA/BAD	4
BP	GO:0033500	carbohydrate homeostasis	4/71	242/18670	0.0135897590393523	0.0302605970511894	0.0127895665367866	AKT1/ICAM1/PPP3CA/BAD	4
BP	GO:0055076	transition metal ion homeostasis	3/71	131/18670	0.0136402860847638	0.0303526258123538	0.0128284622651894	HMOX1/SOD1/MYC	3
BP	GO:0001701	in utero embryonic development	5/71	373/18670	0.0137538222655045	0.0304082313786998	0.0128519638203436	AR/AKT1/MAPK1/TP53/IGF2	5
BP	GO:0002204	somatic recombination of immunoglobulin genes involved in immune response	2/71	47/18670	0.0138034941228159	0.0304082313786998	0.0128519638203436	IL2/CD40LG	2
BP	GO:0002208	somatic diversification of immunoglobulins involved in immune response	2/71	47/18670	0.0138034941228159	0.0304082313786998	0.0128519638203436	IL2/CD40LG	2
BP	GO:0010799	regulation of peptidyl-threonine phosphorylation	2/71	47/18670	0.0138034941228159	0.0304082313786998	0.0128519638203436	CALM1/MAPK1	2
BP	GO:0014911	positive regulation of smooth muscle cell migration	2/71	47/18670	0.0138034941228159	0.0304082313786998	0.0128519638203436	BCL2/MDM2	2
BP	GO:0030574	collagen catabolic process	2/71	47/18670	0.0138034941228159	0.0304082313786998	0.0128519638203436	MMP1/MMP2	2
BP	GO:0035722	interleukin-12-mediated signaling pathway	2/71	47/18670	0.0138034941228159	0.0304082313786998	0.0128519638203436	SOD1/IFNG	2
BP	GO:0042551	neuron maturation	2/71	47/18670	0.0138034941228159	0.0304082313786998	0.0128519638203436	BCL2/RB1	2
BP	GO:0043303	mast cell degranulation	2/71	47/18670	0.0138034941228159	0.0304082313786998	0.0128519638203436	HMOX1/IL4R	2
BP	GO:0045058	T cell selection	2/71	47/18670	0.0138034941228159	0.0304082313786998	0.0128519638203436	IL6/BCL2	2
BP	GO:0045190	isotype switching	2/71	47/18670	0.0138034941228159	0.0304082313786998	0.0128519638203436	IL2/CD40LG	2
BP	GO:0046638	positive regulation of alpha-beta T cell differentiation	2/71	47/18670	0.0138034941228159	0.0304082313786998	0.0128519638203436	IFNG/IL4R	2
BP	GO:0050435	amyloid-beta metabolic process	2/71	47/18670	0.0138034941228159	0.0304082313786998	0.0128519638203436	CASP3/IFNG	2
BP	GO:0061614	pri-miRNA transcription by RNA polymerase II	2/71	47/18670	0.0138034941228159	0.0304082313786998	0.0128519638203436	RELA/TP53	2
BP	GO:0070849	response to epidermal growth factor	2/71	47/18670	0.0138034941228159	0.0304082313786998	0.0128519638203436	AKT1/MAPK1	2
BP	GO:0003158	endothelium development	3/71	132/18670	0.0139200972856571	0.0306242140284457	0.0129432483533303	ICAM1/IL1B/CXCL10	3
BP	GO:0042476	odontogenesis	3/71	132/18670	0.0139200972856571	0.0306242140284457	0.0129432483533303	BAX/SERPINE1/CA2	3
BP	GO:0051896	regulation of protein kinase B signaling	4/71	244/18670	0.013968608858282	0.0307104658443242	0.0129797024700892	AKT1/ESR1/IGF2/ERBB3	4
BP	GO:0009123	nucleoside monophosphate metabolic process	5/71	375/18670	0.0140470120066233	0.0308622767122882	0.0130438649581441	TP53/IFNG/PARP1/CYCS/BAD	5
BP	GO:0071333	cellular response to glucose stimulus	3/71	133/18670	0.0142031710967172	0.031184607198381	0.0131800971412615	ICAM1/PPP3CA/BAD	3
BP	GO:0001774	microglial cell activation	2/71	48/18670	0.0143685902114705	0.0313600183186857	0.0132542342176263	IL6/IFNG	2
BP	GO:0002269	leukocyte activation involved in inflammatory response	2/71	48/18670	0.0143685902114705	0.0313600183186857	0.0132542342176263	IL6/IFNG	2
BP	GO:0002279	mast cell activation involved in immune response	2/71	48/18670	0.0143685902114705	0.0313600183186857	0.0132542342176263	HMOX1/IL4R	2
BP	GO:0002711	positive regulation of T cell mediated immunity	2/71	48/18670	0.0143685902114705	0.0313600183186857	0.0132542342176263	IL6/IL1B	2
BP	GO:0030850	prostate gland development	2/71	48/18670	0.0143685902114705	0.0313600183186857	0.0132542342176263	AR/ESR1	2
BP	GO:0045933	positive regulation of muscle contraction	2/71	48/18670	0.0143685902114705	0.0313600183186857	0.0132542342176263	PTGS2/ABAT	2
BP	GO:0055023	positive regulation of cardiac muscle tissue growth	2/71	48/18670	0.0143685902114705	0.0313600183186857	0.0132542342176263	MAPK14/MAPK1	2
BP	GO:0060324	face development	2/71	48/18670	0.0143685902114705	0.0313600183186857	0.0132542342176263	MMP2/MAPK1	2
BP	GO:0072604	interleukin-6 secretion	2/71	48/18670	0.0143685902114705	0.0313600183186857	0.0132542342176263	NOS2/IL1B	2
BP	GO:0030260	entry into host cell	3/71	134/18670	0.0144895123810518	0.0315404952885692	0.0133305123627924	DPP4/ICAM1/CXCL8	3
BP	GO:0044409	entry into host	3/71	134/18670	0.0144895123810518	0.0315404952885692	0.0133305123627924	DPP4/ICAM1/CXCL8	3
BP	GO:0051806	entry into cell of other organism involved in symbiotic interaction	3/71	134/18670	0.0144895123810518	0.0315404952885692	0.0133305123627924	DPP4/ICAM1/CXCL8	3
BP	GO:0051828	entry into other organism involved in symbiotic interaction	3/71	134/18670	0.0144895123810518	0.0315404952885692	0.0133305123627924	DPP4/ICAM1/CXCL8	3
BP	GO:0042180	cellular ketone metabolic process	4/71	248/18670	0.0147463611974905	0.0320784389925634	0.0135578729394407	PTGS2/AKT1/IL1B/NQO1	4
BP	GO:0071331	cellular response to hexose stimulus	3/71	135/18670	0.0147791258001634	0.0321285343481814	0.0135790456176524	ICAM1/PPP3CA/BAD	3
BP	GO:0002448	mast cell mediated immunity	2/71	49/18670	0.0149435712236054	0.0322945547072023	0.0136492137119755	HMOX1/IL4R	2
BP	GO:0003254	regulation of membrane depolarization	2/71	49/18670	0.0149435712236054	0.0322945547072023	0.0136492137119755	BCL2/PARP1	2
BP	GO:0010712	regulation of collagen metabolic process	2/71	49/18670	0.0149435712236054	0.0322945547072023	0.0136492137119755	IL6/F2	2
BP	GO:0061912	selective autophagy	2/71	49/18670	0.0149435712236054	0.0322945547072023	0.0136492137119755	ADRB2/TP53	2
BP	GO:0071349	cellular response to interleukin-12	2/71	49/18670	0.0149435712236054	0.0322945547072023	0.0136492137119755	SOD1/IFNG	2
BP	GO:0071715	icosanoid transport	2/71	49/18670	0.0149435712236054	0.0322945547072023	0.0136492137119755	NOS2/IL1B	2
BP	GO:1901571	fatty acid derivative transport	2/71	49/18670	0.0149435712236054	0.0322945547072023	0.0136492137119755	NOS2/IL1B	2
BP	GO:1904707	positive regulation of vascular smooth muscle cell proliferation	2/71	49/18670	0.0149435712236054	0.0322945547072023	0.0136492137119755	MMP2/MDM2	2
BP	GO:1990090	cellular response to nerve growth factor stimulus	2/71	49/18670	0.0149435712236054	0.0322945547072023	0.0136492137119755	AKT1/CREB1	2
BP	GO:0007292	female gamete generation	3/71	136/18670	0.0150720158157808	0.0325295305376564	0.0137485256658356	PTGS2/BCL2/IL4R	3
BP	GO:0071326	cellular response to monosaccharide stimulus	3/71	136/18670	0.0150720158157808	0.0325295305376564	0.0137485256658356	ICAM1/PPP3CA/BAD	3
BP	GO:0010951	negative regulation of endopeptidase activity	4/71	250/18670	0.0151453385033757	0.0326664163798299	0.0138063801286362	PTGS2/AKT1/SERPINE1/MDM2	4
BP	GO:0002931	response to ischemia	2/71	50/18670	0.0155283560309904	0.0333399966833236	0.0140910671787572	BCL2/TP53	2
BP	GO:0009409	response to cold	2/71	50/18670	0.0155283560309904	0.0333399966833236	0.0140910671787572	ADRB2/CXCL10	2
BP	GO:0010718	positive regulation of epithelial to mesenchymal transition	2/71	50/18670	0.0155283560309904	0.0333399966833236	0.0140910671787572	IL6/IL1B	2
BP	GO:0032873	negative regulation of stress-activated MAPK cascade	2/71	50/18670	0.0155283560309904	0.0333399966833236	0.0140910671787572	AKT1/MYC	2
BP	GO:0070303	negative regulation of stress-activated protein kinase signaling cascade	2/71	50/18670	0.0155283560309904	0.0333399966833236	0.0140910671787572	AKT1/MYC	2
BP	GO:0070671	response to interleukin-12	2/71	50/18670	0.0155283560309904	0.0333399966833236	0.0140910671787572	SOD1/IFNG	2
BP	GO:1903793	positive regulation of anion transport	2/71	50/18670	0.0155283560309904	0.0333399966833236	0.0140910671787572	IL1B/ABAT	2
BP	GO:0009135	purine nucleoside diphosphate metabolic process	3/71	138/18670	0.0156676424954851	0.0335953347856406	0.0141989851964829	TP53/IFNG/BAD	3
BP	GO:0009179	purine ribonucleoside diphosphate metabolic process	3/71	138/18670	0.0156676424954851	0.0335953347856406	0.0141989851964829	TP53/IFNG/BAD	3
BP	GO:0019369	arachidonic acid metabolic process	2/71	51/18670	0.0161228639641871	0.0344818218287864	0.0145736567537933	PTGS2/CYP1A1	2
BP	GO:0031103	axon regeneration	2/71	51/18670	0.0161228639641871	0.0344818218287864	0.0145736567537933	BCL2/SPP1	2
BP	GO:0048260	positive regulation of receptor-mediated endocytosis	2/71	51/18670	0.0161228639641871	0.0344818218287864	0.0145736567537933	SELE/SERPINE1	2
BP	GO:0051452	intracellular pH reduction	2/71	51/18670	0.0161228639641871	0.0344818218287864	0.0145736567537933	BCL2/CA2	2
BP	GO:0009185	ribonucleoside diphosphate metabolic process	3/71	140/18670	0.0162764241873715	0.0347426906974941	0.0146839123362615	TP53/IFNG/BAD	3
BP	GO:0046330	positive regulation of JNK cascade	3/71	140/18670	0.0162764241873715	0.0347426906974941	0.0146839123362615	PTPN1/IL1B/CD40LG	3
BP	GO:1903364	positive regulation of cellular protein catabolic process	3/71	140/18670	0.0162764241873715	0.0347426906974941	0.0146839123362615	AKT1/NFE2L2/MDM2	3
BP	GO:0007611	learning or memory	4/71	256/18670	0.0163831072309931	0.0349252285932024	0.0147610615266326	PTGS2/CASP3/MAPK1/CREB1	4
BP	GO:0090596	sensory organ morphogenesis	4/71	256/18670	0.0163831072309931	0.0349252285932024	0.0147610615266326	BCL2/BAX/MAPK1/SOD1	4
BP	GO:0048863	stem cell differentiation	4/71	257/18670	0.0165954029922689	0.0353549579564154	0.0149426855796652	ESR1/MAPK1/TP53/NFE2L2	4
BP	GO:0003179	heart valve morphogenesis	2/71	52/18670	0.0167270148103128	0.0355206878211276	0.0150127308972868	RB1/MDM2	2
BP	GO:0016447	somatic recombination of immunoglobulin gene segments	2/71	52/18670	0.0167270148103128	0.0355206878211276	0.0150127308972868	IL2/CD40LG	2
BP	GO:0060421	positive regulation of heart growth	2/71	52/18670	0.0167270148103128	0.0355206878211276	0.0150127308972868	MAPK14/MAPK1	2
BP	GO:0072132	mesenchyme morphogenesis	2/71	52/18670	0.0167270148103128	0.0355206878211276	0.0150127308972868	MYC/MDM2	2
BP	GO:1990089	response to nerve growth factor	2/71	52/18670	0.0167270148103128	0.0355206878211276	0.0150127308972868	AKT1/CREB1	2
BP	GO:0038127	ERBB signaling pathway	3/71	142/18670	0.0168983895774941	0.0358615341515952	0.0151567887562563	AKT1/MAPK1/ERBB3	3
BP	GO:0044344	cellular response to fibroblast growth factor stimulus	3/71	143/18670	0.0172143242952103	0.0365085283895848	0.0154302392715151	MAPK1/CCL2/CXCL8	3
BP	GO:0032412	regulation of ion transmembrane transporter activity	4/71	260/18670	0.0172426615790254	0.0365451401482233	0.0154457131407961	ADRB2/CALM1/CCL2/IFNG	4
BP	GO:0031638	zymogen activation	2/71	53/18670	0.017340728810815	0.0365884942939191	0.0154640366632992	SERPINE1/BAD	2
BP	GO:0032964	collagen biosynthetic process	2/71	53/18670	0.017340728810815	0.0365884942939191	0.0154640366632992	IL6/F2	2
BP	GO:0038066	p38MAPK cascade	2/71	53/18670	0.017340728810815	0.0365884942939191	0.0154640366632992	MAPK14/IL1B	2
BP	GO:0045744	negative regulation of G protein-coupled receptor signaling pathway	2/71	53/18670	0.017340728810815	0.0365884942939191	0.0154640366632992	ADRB2/CXCL8	2
BP	GO:0045851	pH reduction	2/71	53/18670	0.017340728810815	0.0365884942939191	0.0154640366632992	BCL2/CA2	2
BP	GO:0060563	neuroepithelial cell differentiation	2/71	53/18670	0.017340728810815	0.0365884942939191	0.0154640366632992	SOD1/SERPINE1	2
BP	GO:1905517	macrophage migration	2/71	53/18670	0.017340728810815	0.0365884942939191	0.0154640366632992	MAPK14/CCL2	2
BP	GO:0071322	cellular response to carbohydrate stimulus	3/71	144/18670	0.0175335643272847	0.0369717330862873	0.015626011591493	ICAM1/PPP3CA/BAD	3
BP	GO:0010466	negative regulation of peptidase activity	4/71	262/18670	0.0176828505414112	0.0372389322186706	0.0157389426442547	PTGS2/AKT1/SERPINE1/MDM2	4
BP	GO:0015850	organic hydroxy compound transport	4/71	262/18670	0.0176828505414112	0.0372389322186706	0.0157389426442547	PON1/MAOB/SPP1/ABAT	4
BP	GO:0007605	sensory perception of sound	3/71	145/18670	0.0178561124179515	0.0375798284306376	0.0158830215855167	CASP3/ICAM1/SOD1	3
BP	GO:0006636	unsaturated fatty acid biosynthetic process	2/71	54/18670	0.0179639266592555	0.0377105330633227	0.0159382635754075	PTGS2/IL1B	2
BP	GO:0032663	regulation of interleukin-2 production	2/71	54/18670	0.0179639266592555	0.0377105330633227	0.0159382635754075	IL1B/IL1A	2
BP	GO:0050994	regulation of lipid catabolic process	2/71	54/18670	0.0179639266592555	0.0377105330633227	0.0159382635754075	AKT1/IL1B	2
BP	GO:0090329	regulation of DNA-dependent DNA replication	2/71	54/18670	0.0179639266592555	0.0377105330633227	0.0159382635754075	CDK2/CHEK2	2
BP	GO:0051250	negative regulation of lymphocyte activation	3/71	146/18670	0.0181819711293387	0.0381439953762351	0.0161214653504024	CASP3/IL2/IL4R	3
BP	GO:0019359	nicotinamide nucleotide biosynthetic process	3/71	147/18670	0.0185111428431721	0.0387183264019212	0.016364204938611	PTGS2/TP53/IFNG	3
BP	GO:0019363	pyridine nucleotide biosynthetic process	3/71	147/18670	0.0185111428431721	0.0387183264019212	0.016364204938611	PTGS2/TP53/IFNG	3
BP	GO:0044839	cell cycle G2/M phase transition	4/71	266/18670	0.0185842095596962	0.0387183264019212	0.016364204938611	CDK2/CDKN1A/TP53/CHEK2	4
BP	GO:0002886	regulation of myeloid leukocyte mediated immunity	2/71	55/18670	0.0185965294991046	0.0387183264019212	0.016364204938611	HMOX1/IL4R	2
BP	GO:0010823	negative regulation of mitochondrion organization	2/71	55/18670	0.0185965294991046	0.0387183264019212	0.016364204938611	AKT1/TP53	2
BP	GO:0042220	response to cocaine	2/71	55/18670	0.0185965294991046	0.0387183264019212	0.016364204938611	MDM2/ABAT	2
BP	GO:0042304	regulation of fatty acid biosynthetic process	2/71	55/18670	0.0185965294991046	0.0387183264019212	0.016364204938611	PTGS2/IL1B	2
BP	GO:0043030	regulation of macrophage activation	2/71	55/18670	0.0185965294991046	0.0387183264019212	0.016364204938611	IL6/IL4R	2
BP	GO:0045620	negative regulation of lymphocyte differentiation	2/71	55/18670	0.0185965294991046	0.0387183264019212	0.016364204938611	IL2/IL4R	2
BP	GO:0046456	icosanoid biosynthetic process	2/71	55/18670	0.0185965294991046	0.0387183264019212	0.016364204938611	PTGS2/IL1B	2
BP	GO:0048016	inositol phosphate-mediated signaling	2/71	55/18670	0.0185965294991046	0.0387183264019212	0.016364204938611	PPP3CA/ERBB3	2
BP	GO:0061098	positive regulation of protein tyrosine kinase activity	2/71	55/18670	0.0185965294991046	0.0387183264019212	0.016364204938611	PTPN1/ERBB3	2
BP	GO:0051592	response to calcium ion	3/71	148/18670	0.0188436297624664	0.0392080568828116	0.0165711883157019	CALM1/PPP3CA/BAD	3
BP	GO:0002706	regulation of lymphocyte mediated immunity	3/71	149/18670	0.0191794339132065	0.0398536813817315	0.0168440599141289	IL6/IL1B/IL2	3
BP	GO:2000058	regulation of ubiquitin-dependent protein catabolic process	3/71	149/18670	0.0191794339132065	0.0398536813817315	0.0168440599141289	AKT1/NFE2L2/MDM2	3
BP	GO:0002381	immunoglobulin production involved in immunoglobulin mediated immune response	2/71	56/18670	0.0192384589215449	0.0398536813817315	0.0168440599141289	IL2/CD40LG	2
BP	GO:0060688	regulation of morphogenesis of a branching structure	2/71	56/18670	0.0192384589215449	0.0398536813817315	0.0168440599141289	AR/ESR1	2
BP	GO:0098586	cellular response to virus	2/71	56/18670	0.0192384589215449	0.0398536813817315	0.0168440599141289	MAPK14/BAD	2
BP	GO:1903078	positive regulation of protein localization to plasma membrane	2/71	56/18670	0.0192384589215449	0.0398536813817315	0.0168440599141289	AKT1/IFNG	2
BP	GO:1903202	negative regulation of oxidative stress-induced cell death	2/71	56/18670	0.0192384589215449	0.0398536813817315	0.0168440599141289	AKT1/NFE2L2	2
BP	GO:0000280	nuclear division	5/71	407/18670	0.0193257546740831	0.0400094042813515	0.0169098758126924	RB1/IL1B/IL1A/CHEK2/IGF2	5
BP	GO:0008360	regulation of cell shape	3/71	150/18670	0.0195185571460169	0.0403074083741275	0.0170358265058115	F2/ICAM1/CCL2	3
BP	GO:0050777	negative regulation of immune response	3/71	150/18670	0.0195185571460169	0.0403074083741275	0.0170358265058115	HMOX1/IL2/IL4R	3
BP	GO:0071774	response to fibroblast growth factor	3/71	150/18670	0.0195185571460169	0.0403074083741275	0.0170358265058115	MAPK1/CCL2/CXCL8	3
BP	GO:0072525	pyridine-containing compound biosynthetic process	3/71	150/18670	0.0195185571460169	0.0403074083741275	0.0170358265058115	PTGS2/TP53/IFNG	3
BP	GO:0010665	regulation of cardiac muscle cell apoptotic process	2/71	57/18670	0.0198896369632855	0.0408945806721758	0.0172839934260392	TP53/NFE2L2	2
BP	GO:0019320	hexose catabolic process	2/71	57/18670	0.0198896369632855	0.0408945806721758	0.0172839934260392	TP53/BAD	2
BP	GO:0045981	positive regulation of nucleotide metabolic process	2/71	57/18670	0.0198896369632855	0.0408945806721758	0.0172839934260392	NOS2/IFNG	2
BP	GO:0060043	regulation of cardiac muscle cell proliferation	2/71	57/18670	0.0198896369632855	0.0408945806721758	0.0172839934260392	MAPK14/MAPK1	2
BP	GO:0071398	cellular response to fatty acid	2/71	57/18670	0.0198896369632855	0.0408945806721758	0.0172839934260392	AKT1/CREB1	2
BP	GO:1900408	negative regulation of cellular response to oxidative stress	2/71	57/18670	0.0198896369632855	0.0408945806721758	0.0172839934260392	AKT1/NFE2L2	2
BP	GO:1900544	positive regulation of purine nucleotide metabolic process	2/71	57/18670	0.0198896369632855	0.0408945806721758	0.0172839934260392	NOS2/IFNG	2
BP	GO:0001678	cellular glucose homeostasis	3/71	152/18670	0.0202067673934836	0.0414949174850628	0.0175377242959197	ICAM1/PPP3CA/BAD	3
BP	GO:0030902	hindbrain development	3/71	152/18670	0.0202067673934836	0.0414949174850628	0.0175377242959197	BCL2/TP53/ABAT	3
BP	GO:0098742	cell-cell adhesion via plasma-membrane adhesion molecules	4/71	273/18670	0.0202295243128618	0.0415158148211715	0.017546556503366	ICAM1/SELE/VCAM1/MAPK14	4
BP	GO:0035306	positive regulation of dephosphorylation	2/71	58/18670	0.0205499861043851	0.0421331235506891	0.0178074605118542	CALM1/IFNG	2
BP	GO:0006261	DNA-dependent DNA replication	3/71	153/18670	0.0205558572474574	0.0421331235506891	0.0178074605118542	CDK2/CHEK2/PCNA	3
BP	GO:0016054	organic acid catabolic process	4/71	275/18670	0.0207156337485041	0.0424079350930916	0.017923608930892	PON1/NOS2/AKT1/ABAT	4
BP	GO:0046395	carboxylic acid catabolic process	4/71	275/18670	0.0207156337485041	0.0424079350930916	0.017923608930892	PON1/NOS2/AKT1/ABAT	4
BP	GO:0055067	monovalent inorganic cation homeostasis	3/71	154/18670	0.0209082718653984	0.0427757576911436	0.0180790682426684	BCL2/MAPK1/CA2	3
BP	GO:0001658	branching involved in ureteric bud morphogenesis	2/71	59/18670	0.021219429266086	0.0432247633198048	0.01826883936164	BCL2/MYC	2
BP	GO:0001885	endothelial cell development	2/71	59/18670	0.021219429266086	0.0432247633198048	0.01826883936164	ICAM1/IL1B	2
BP	GO:0010518	positive regulation of phospholipase activity	2/71	59/18670	0.021219429266086	0.0432247633198048	0.01826883936164	SELE/ESR1	2
BP	GO:0010656	negative regulation of muscle cell apoptotic process	2/71	59/18670	0.021219429266086	0.0432247633198048	0.01826883936164	HMOX1/NFE2L2	2
BP	GO:0010662	regulation of striated muscle cell apoptotic process	2/71	59/18670	0.021219429266086	0.0432247633198048	0.01826883936164	TP53/NFE2L2	2
BP	GO:0031102	neuron projection regeneration	2/71	59/18670	0.021219429266086	0.0432247633198048	0.01826883936164	BCL2/SPP1	2
BP	GO:1902883	negative regulation of response to oxidative stress	2/71	59/18670	0.021219429266086	0.0432247633198048	0.01826883936164	AKT1/NFE2L2	2
BP	GO:0010977	negative regulation of neuron projection development	3/71	155/18670	0.0212640122457854	0.0432621704137433	0.0182846493774194	PPP3CA/SPP1/MDM2	3
BP	GO:1902652	secondary alcohol metabolic process	3/71	155/18670	0.0212640122457854	0.0432621704137433	0.0182846493774194	PON1/CYP3A4/SOD1	3
BP	GO:0001822	kidney development	4/71	278/18670	0.0214582479582221	0.0436304487135755	0.0184403012904266	BCL2/BAX/MYC/CA2	4
BP	GO:0051053	negative regulation of DNA metabolic process	3/71	156/18670	0.021623079221523	0.0439385230486613	0.0185705081465634	TP53/PARP1/CHEK2	3
BP	GO:0010659	cardiac muscle cell apoptotic process	2/71	60/18670	0.0218978898086564	0.0444148963543739	0.0187718461465854	TP53/NFE2L2	2
BP	GO:0033260	nuclear DNA replication	2/71	60/18670	0.0218978898086564	0.0444148963543739	0.0187718461465854	CHEK2/PCNA	2
BP	GO:0045576	mast cell activation	2/71	60/18670	0.0218978898086564	0.0444148963543739	0.0187718461465854	HMOX1/IL4R	2
BP	GO:0060047	heart contraction	4/71	280/18670	0.0219623278765863	0.0445182321822695	0.0188155207787901	CALM1/SOD1/IL2/MDM2	4
BP	GO:0009132	nucleoside diphosphate metabolic process	3/71	158/18670	0.0223511954723458	0.0452786648611057	0.0191369157706427	TP53/IFNG/BAD	3
BP	GO:0003170	heart valve development	2/71	61/18670	0.022585291529244	0.0456128898693422	0.0192781751441398	RB1/MDM2	2
BP	GO:0030521	androgen receptor signaling pathway	2/71	61/18670	0.022585291529244	0.0456128898693422	0.0192781751441398	AR/RB1	2
BP	GO:0034113	heterotypic cell-cell adhesion	2/71	61/18670	0.022585291529244	0.0456128898693422	0.0192781751441398	VCAM1/IL1B	2
BP	GO:0048645	animal organ formation	2/71	61/18670	0.022585291529244	0.0456128898693422	0.0192781751441398	AR/MAPK1	2
BP	GO:1905953	negative regulation of lipid localization	2/71	61/18670	0.022585291529244	0.0456128898693422	0.0192781751441398	IL6/AKT1	2
BP	GO:0021700	developmental maturation	4/71	284/18670	0.0229922063569399	0.0464062880598788	0.0196135029280189	BCL2/CDKN1A/MMP2/RB1	4
BP	GO:0006754	ATP biosynthetic process	3/71	160/18670	0.0230926240298904	0.046580476343911	0.0196871231756562	TP53/IFNG/PARP1	3
BP	GO:0002562	somatic diversification of immune receptors via germline recombination within a single locus	2/71	62/18670	0.0232815586597375	0.0467899778179865	0.0197756684557678	IL2/CD40LG	2
BP	GO:0010658	striated muscle cell apoptotic process	2/71	62/18670	0.0232815586597375	0.0467899778179865	0.0197756684557678	TP53/NFE2L2	2
BP	GO:0016444	somatic cell DNA recombination	2/71	62/18670	0.0232815586597375	0.0467899778179865	0.0197756684557678	IL2/CD40LG	2
BP	GO:0032623	interleukin-2 production	2/71	62/18670	0.0232815586597375	0.0467899778179865	0.0197756684557678	IL1B/IL1A	2
BP	GO:0046635	positive regulation of alpha-beta T cell activation	2/71	62/18670	0.0232815586597375	0.0467899778179865	0.0197756684557678	IFNG/IL4R	2
BP	GO:1904356	regulation of telomere maintenance via telomere lengthening	2/71	62/18670	0.0232815586597375	0.0467899778179865	0.0197756684557678	MAPK1/PARP1	2
BP	GO:0032635	interleukin-6 production	3/71	161/18670	0.0234683307917737	0.0471366351873727	0.0199221823359709	IL6/NOS2/IL1B	3
BP	GO:0031646	positive regulation of neurological system process	2/71	63/18670	0.0239866158646394	0.0481190470232888	0.020337396269811	ADRB2/ABAT	2
BP	GO:1904377	positive regulation of protein localization to cell periphery	2/71	63/18670	0.0239866158646394	0.0481190470232888	0.020337396269811	AKT1/IFNG	2
BP	GO:0031214	biomineral tissue development	3/71	163/18670	0.0242297286460054	0.0485772202501931	0.020531042051517	PTGS2/ADRB2/SPP1	3
BP	GO:0003015	heart process	4/71	290/18670	0.0245916640770286	0.0492729152727349	0.0208250758329741	CALM1/SOD1/IL2/MDM2	4
BP	GO:0016445	somatic diversification of immunoglobulins	2/71	64/18670	0.0247003882389467	0.0493111198962638	0.0208412229226634	IL2/CD40LG	2
BP	GO:0036498	IRE1-mediated unfolded protein response	2/71	64/18670	0.0247003882389467	0.0493111198962638	0.0208412229226634	BAX/PTPN1	2
BP	GO:0043550	regulation of lipid kinase activity	2/71	64/18670	0.0247003882389467	0.0493111198962638	0.0208412229226634	F2/RB1	2
BP	GO:0048247	lymphocyte chemotaxis	2/71	64/18670	0.0247003882389467	0.0493111198962638	0.0208412229226634	CCL2/CXCL10	2
BP	GO:1903672	positive regulation of sprouting angiogenesis	2/71	64/18670	0.0247003882389467	0.0493111198962638	0.0208412229226634	PTGS2/HMOX1	2
BP	GO:2000378	negative regulation of reactive oxygen species metabolic process	2/71	64/18670	0.0247003882389467	0.0493111198962638	0.0208412229226634	BCL2/TP53	2
BP	GO:0050680	negative regulation of epithelial cell proliferation	3/71	165/18670	0.025004436296061	0.0498577883848951	0.02107227100797	AR/RB1/CCL2	3
BP	GO:0050954	sensory perception of mechanical stimulus	3/71	165/18670	0.025004436296061	0.0498577883848951	0.02107227100797	CASP3/ICAM1/SOD1	3
BP	GO:0002244	hematopoietic progenitor cell differentiation	3/71	166/18670	0.025396779734155	0.0505393038011689	0.0213603118138912	BCL2/TP53/NFE2L2	3
BP	GO:0072001	renal system development	4/71	293/18670	0.0254161377278908	0.0505393038011689	0.0213603118138912	BCL2/BAX/MYC/CA2	4
BP	GO:0045739	positive regulation of DNA repair	2/71	65/18670	0.0254228013060425	0.0505393038011689	0.0213603118138912	PARP1/PCNA	2
BP	GO:0051187	cofactor catabolic process	2/71	65/18670	0.0254228013060425	0.0505393038011689	0.0213603118138912	HMOX1/MPO	2
BP	GO:0060675	ureteric bud morphogenesis	2/71	65/18670	0.0254228013060425	0.0505393038011689	0.0213603118138912	BCL2/MYC	2
BP	GO:0010256	endomembrane system organization	5/71	438/18670	0.0255538891856416	0.050769316262864	0.0214575260122153	AR/AKT1/MAPK1/SOD1/CREB1	5
BP	GO:0046888	negative regulation of hormone secretion	2/71	66/18670	0.0261537810155962	0.0518986634705155	0.021934841817682	PPP3CA/IL1B	2
BP	GO:0072171	mesonephric tubule morphogenesis	2/71	66/18670	0.0261537810155962	0.0518986634705155	0.021934841817682	BCL2/MYC	2
BP	GO:0001818	negative regulation of cytokine production	4/71	296/18670	0.0262571974601936	0.0520412922634468	0.0219951235244233	IL6/F2/HMOX1/IFNG	4
BP	GO:0050890	cognition	4/71	296/18670	0.0262571974601936	0.0520412922634468	0.0219951235244233	PTGS2/CASP3/MAPK1/CREB1	4
BP	GO:0030858	positive regulation of epithelial cell differentiation	2/71	67/18670	0.0268932537414732	0.0531423576927315	0.0224604861061784	SERPINE1/BAD	2
BP	GO:0046365	monosaccharide catabolic process	2/71	67/18670	0.0268932537414732	0.0531423576927315	0.0224604861061784	TP53/BAD	2
BP	GO:0048747	muscle fiber development	2/71	67/18670	0.0268932537414732	0.0531423576927315	0.0224604861061784	BCL2/PPP3CA	2
BP	GO:0060038	cardiac muscle cell proliferation	2/71	67/18670	0.0268932537414732	0.0531423576927315	0.0224604861061784	MAPK14/MAPK1	2
BP	GO:2000573	positive regulation of DNA biosynthetic process	2/71	67/18670	0.0268932537414732	0.0531423576927315	0.0224604861061784	MAPK1/MYC	2
BP	GO:0043433	negative regulation of DNA-binding transcription factor activity	3/71	170/18670	0.026999395206939	0.0533201700675636	0.0225356380668331	HMOX1/ESR1/RB1	3
BP	GO:0006164	purine nucleotide biosynthetic process	4/71	300/18670	0.0274045181631073	0.0540308039087208	0.0228359857030479	NOS2/TP53/IFNG/PARP1	4
BP	GO:0070372	regulation of ERK1 and ERK2 cascade	4/71	300/18670	0.0274045181631073	0.0540308039087208	0.0228359857030479	ICAM1/PTPN1/IL1B/CCL2	4
BP	GO:0009206	purine ribonucleoside triphosphate biosynthetic process	3/71	171/18670	0.0274083532555147	0.0540308039087208	0.0228359857030479	TP53/IFNG/PARP1	3
BP	GO:0016239	positive regulation of macroautophagy	2/71	68/18670	0.0276411462796547	0.0543922377596067	0.022988744826628	ADRB2/HMOX1	2
BP	GO:0019915	lipid storage	2/71	68/18670	0.0276411462796547	0.0543922377596067	0.022988744826628	IL6/IL1B	2
BP	GO:0050918	positive chemotaxis	2/71	68/18670	0.0276411462796547	0.0543922377596067	0.022988744826628	CXCL8/CXCL10	2
BP	GO:0007265	Ras protein signal transduction	5/71	448/18670	0.027809264898065	0.0546151570015212	0.0230829610931469	MAPK14/CDK2/CDKN1A/RB1/TP53	5
BP	GO:0009145	purine nucleoside triphosphate biosynthetic process	3/71	172/18670	0.0278206299756234	0.0546151570015212	0.0230829610931469	TP53/IFNG/PARP1	3
BP	GO:0021543	pallium development	3/71	172/18670	0.0278206299756234	0.0546151570015212	0.0230829610931469	BAX/CASP3/BAD	3
BP	GO:0032874	positive regulation of stress-activated MAPK cascade	3/71	172/18670	0.0278206299756234	0.0546151570015212	0.0230829610931469	PTPN1/IL1B/CD40LG	3
BP	GO:0048285	organelle fission	5/71	449/18670	0.0280415751961972	0.0550161701233357	0.0232524482977416	RB1/IL1B/IL1A/CHEK2/IGF2	5
BP	GO:0070304	positive regulation of stress-activated protein kinase signaling cascade	3/71	173/18670	0.0282362236206202	0.0553651443541573	0.0233999413937028	PTPN1/IL1B/CD40LG	3
BP	GO:0045088	regulation of innate immune response	5/71	452/18670	0.028745948436492	0.0563311341095151	0.0238082145757919	CD14/RELA/ESR1/PTPN1/IFNG	5
BP	GO:0010921	regulation of phosphatase activity	3/71	175/18670	0.029077354007689	0.0569433551760617	0.0240669682961027	CALM1/IFNG/IGFBP3	3
BP	GO:0002709	regulation of T cell mediated immunity	2/71	70/18670	0.0291619000750134	0.0569433551760617	0.0240669682961027	IL6/IL1B	2
BP	GO:0010517	regulation of phospholipase activity	2/71	70/18670	0.0291619000750134	0.0569433551760617	0.0240669682961027	SELE/ESR1	2
BP	GO:0034121	regulation of toll-like receptor signaling pathway	2/71	70/18670	0.0291619000750134	0.0569433551760617	0.0240669682961027	CD14/ESR1	2
BP	GO:0051966	regulation of synaptic transmission, glutamatergic	2/71	70/18670	0.0291619000750134	0.0569433551760617	0.0240669682961027	PTGS2/CCL2	2
BP	GO:0070988	demethylation	2/71	70/18670	0.0291619000750134	0.0569433551760617	0.0240669682961027	CYP3A4/CYP1A1	2
BP	GO:0016570	histone modification	5/71	454/18670	0.0292217510389601	0.0570264804426778	0.0241021009845448	MAPK8/CDK2/TP53/IL1B/IGF2	5
BP	GO:0001936	regulation of endothelial cell proliferation	3/71	176/18670	0.0295028865696812	0.0575071031777601	0.0243052349953851	AKT1/HMOX1/CCL2	3
BP	GO:0051897	positive regulation of protein kinase B signaling	3/71	176/18670	0.0295028865696812	0.0575071031777601	0.0243052349953851	ESR1/IGF2/ERBB3	3
BP	GO:0001959	regulation of cytokine-mediated signaling pathway	3/71	177/18670	0.029931727699193	0.0581768175225224	0.0245882881076052	IL6/PTPN1/IFNG	3
BP	GO:0009201	ribonucleoside triphosphate biosynthetic process	3/71	177/18670	0.029931727699193	0.0581768175225224	0.0245882881076052	TP53/IFNG/PARP1	3
BP	GO:0048469	cell maturation	3/71	177/18670	0.029931727699193	0.0581768175225224	0.0245882881076052	BCL2/CDKN1A/RB1	3
BP	GO:0033692	cellular polysaccharide biosynthetic process	2/71	71/18670	0.0299346170161342	0.0581768175225224	0.0245882881076052	AKT1/IGF2	2
BP	GO:0044786	cell cycle DNA replication	2/71	71/18670	0.0299346170161342	0.0581768175225224	0.0245882881076052	CHEK2/PCNA	2
BP	GO:0006305	DNA alkylation	2/71	72/18670	0.03071546513335	0.0595540745828761	0.0251703823994612	MYC/PARP1	2
BP	GO:0006306	DNA methylation	2/71	72/18670	0.03071546513335	0.0595540745828761	0.0251703823994612	MYC/PARP1	2
BP	GO:0032024	positive regulation of insulin secretion	2/71	72/18670	0.03071546513335	0.0595540745828761	0.0251703823994612	BAD/ABAT	2
BP	GO:0060193	positive regulation of lipase activity	2/71	72/18670	0.03071546513335	0.0595540745828761	0.0251703823994612	SELE/ESR1	2
BP	GO:0006611	protein export from nucleus	3/71	179/18670	0.0307993258289961	0.0596465817110839	0.0252094803085123	TP53/IL1B/MDM2	3
BP	GO:0008361	regulation of cell size	3/71	179/18670	0.0307993258289961	0.0596465817110839	0.0252094803085123	AKT1/SPP1/CREB1	3
BP	GO:1905330	regulation of morphogenesis of an epithelium	3/71	180/18670	0.0312380775859337	0.0604607953276136	0.0255536056807298	AR/ESR1/CXCL10	3
BP	GO:0072522	purine-containing compound biosynthetic process	4/71	313/18670	0.0313392872406598	0.060621130066927	0.0256213707619388	NOS2/TP53/IFNG/PARP1	4
BP	GO:0002312	B cell activation involved in immune response	2/71	73/18670	0.031504373302334	0.0608334885299603	0.0257111235413708	IL2/CD40LG	2
BP	GO:0032945	negative regulation of mononuclear cell proliferation	2/71	73/18670	0.031504373302334	0.0608334885299603	0.0257111235413708	CASP3/IL2	2
BP	GO:0050672	negative regulation of lymphocyte proliferation	2/71	73/18670	0.031504373302334	0.0608334885299603	0.0257111235413708	CASP3/IL2	2
BP	GO:0070588	calcium ion transmembrane transport	4/71	315/18670	0.0319727647114688	0.0617018266361679	0.0260781244953501	BAX/F2/CALM1/CXCL10	4
BP	GO:0006338	chromatin remodeling	3/71	182/18670	0.0321254724073423	0.0619602916097193	0.0261873640774731	ESR1/RB1/MYC	3
BP	GO:0051346	negative regulation of hydrolase activity	5/71	466/18670	0.0321819086604776	0.0620328846843317	0.0262180453610015	PTGS2/AKT1/TP53/SERPINE1/MDM2	5
BP	GO:0050851	antigen receptor-mediated signaling pathway	4/71	316/18670	0.0322923285504609	0.0620816503601229	0.0262386560533215	BCL2/BAX/RELA/MAPK1	4
BP	GO:0032418	lysosome localization	2/71	74/18670	0.0323012708085852	0.0620816503601229	0.0262386560533215	HMOX1/IL4R	2
BP	GO:0043507	positive regulation of JUN kinase activity	2/71	74/18670	0.0323012708085852	0.0620816503601229	0.0262386560533215	PTPN1/CD40LG	2
BP	GO:0072078	nephron tubule morphogenesis	2/71	74/18670	0.0323012708085852	0.0620816503601229	0.0262386560533215	BCL2/MYC	2
BP	GO:1901616	organic hydroxy compound catabolic process	2/71	74/18670	0.0323012708085852	0.0620816503601229	0.0262386560533215	MAOB/MAOA	2
BP	GO:0002040	sprouting angiogenesis	3/71	183/18670	0.032574109459579	0.062460523658693	0.0263987859163535	PTGS2/AKT1/HMOX1	3
BP	GO:0009127	purine nucleoside monophosphate biosynthetic process	3/71	183/18670	0.032574109459579	0.062460523658693	0.0263987859163535	TP53/IFNG/PARP1	3
BP	GO:0009168	purine ribonucleoside monophosphate biosynthetic process	3/71	183/18670	0.032574109459579	0.062460523658693	0.0263987859163535	TP53/IFNG/PARP1	3
BP	GO:0061136	regulation of proteasomal protein catabolic process	3/71	183/18670	0.032574109459579	0.062460523658693	0.0263987859163535	AKT1/NFE2L2/MDM2	3
BP	GO:0002200	somatic diversification of immune receptors	2/71	75/18670	0.0331060873454124	0.0633701207887825	0.0267832248947805	IL2/CD40LG	2
BP	GO:0010611	regulation of cardiac muscle hypertrophy	2/71	75/18670	0.0331060873454124	0.0633701207887825	0.0267832248947805	PPP3CA/PARP1	2
BP	GO:0021536	diencephalon development	2/71	75/18670	0.0331060873454124	0.0633701207887825	0.0267832248947805	BAX/CREB1	2
BP	GO:0019674	NAD metabolic process	2/71	76/18670	0.0339187530119275	0.0648129038444474	0.0273930135865687	PTGS2/TP53	2
BP	GO:0060411	cardiac septum morphogenesis	2/71	76/18670	0.0339187530119275	0.0648129038444474	0.0273930135865687	TP53/MDM2	2
BP	GO:0072088	nephron epithelium morphogenesis	2/71	76/18670	0.0339187530119275	0.0648129038444474	0.0273930135865687	BCL2/MYC	2
BP	GO:0022900	electron transport chain	3/71	186/18670	0.0339397404878828	0.064815476626165	0.0273941009664015	MAOB/NQO1/CYCS	3
BP	GO:0016569	covalent chromatin modification	5/71	474/18670	0.0342566350881103	0.0653828200062256	0.0276338872434606	MAPK8/CDK2/TP53/IL1B/IGF2	5
BP	GO:0048167	regulation of synaptic plasticity	3/71	187/18670	0.0344015126568622	0.0656213825246504	0.027734715102125	PTGS2/MAPK1/CREB1	3
BP	GO:0016575	histone deacetylation	2/71	77/18670	0.0347391983110465	0.0661126611455902	0.0279423527967806	MAPK8/TP53	2
BP	GO:0032481	positive regulation of type I interferon production	2/71	77/18670	0.0347391983110465	0.0661126611455902	0.0279423527967806	CD14/RELA	2
BP	GO:0051851	modification by host of symbiont morphology or physiology	2/71	77/18670	0.0347391983110465	0.0661126611455902	0.0279423527967806	F2/CALM1	2
BP	GO:0061418	regulation of transcription from RNA polymerase II promoter in response to hypoxia	2/71	77/18670	0.0347391983110465	0.0661126611455902	0.0279423527967806	TP53/NFE2L2	2
BP	GO:0009142	nucleoside triphosphate biosynthetic process	3/71	188/18670	0.0348665597051968	0.0662404415815483	0.0279963588821536	TP53/IFNG/PARP1	3
BP	GO:0031345	negative regulation of cell projection organization	3/71	188/18670	0.0348665597051968	0.0662404415815483	0.0279963588821536	PPP3CA/SPP1/MDM2	3
BP	GO:0043902	positive regulation of multi-organism process	3/71	188/18670	0.0348665597051968	0.0662404415815483	0.0279963588821536	NOS2/IFNG/BAD	3
BP	GO:0019362	pyridine nucleotide metabolic process	3/71	189/18670	0.0353348778343821	0.0670529596627147	0.0283397676405413	PTGS2/TP53/IFNG	3
BP	GO:0046496	nicotinamide nucleotide metabolic process	3/71	189/18670	0.0353348778343821	0.0670529596627147	0.0283397676405413	PTGS2/TP53/IFNG	3
BP	GO:0000271	polysaccharide biosynthetic process	2/71	78/18670	0.0355673541475016	0.0671466068002032	0.0283793473716967	AKT1/IGF2	2
BP	GO:0001910	regulation of leukocyte mediated cytotoxicity	2/71	78/18670	0.0355673541475016	0.0671466068002032	0.0283793473716967	NOS2/ICAM1	2
BP	GO:0014743	regulation of muscle hypertrophy	2/71	78/18670	0.0355673541475016	0.0671466068002032	0.0283793473716967	PPP3CA/PARP1	2
BP	GO:0042246	tissue regeneration	2/71	78/18670	0.0355673541475016	0.0671466068002032	0.0283793473716967	PPP3CA/CDKN1A	2
BP	GO:0043407	negative regulation of MAP kinase activity	2/71	78/18670	0.0355673541475016	0.0671466068002032	0.0283793473716967	PTPN1/IL1B	2
BP	GO:0055021	regulation of cardiac muscle tissue growth	2/71	78/18670	0.0355673541475016	0.0671466068002032	0.0283793473716967	MAPK14/MAPK1	2
BP	GO:0061333	renal tubule morphogenesis	2/71	78/18670	0.0355673541475016	0.0671466068002032	0.0283793473716967	BCL2/MYC	2
BP	GO:0070664	negative regulation of leukocyte proliferation	2/71	78/18670	0.0355673541475016	0.0671466068002032	0.0283793473716967	CASP3/IL2	2
BP	GO:0072028	nephron morphogenesis	2/71	78/18670	0.0355673541475016	0.0671466068002032	0.0283793473716967	BCL2/MYC	2
BP	GO:0060759	regulation of response to cytokine stimulus	3/71	190/18670	0.035806463128861	0.0675593643940774	0.028553798348374	IL6/PTPN1/IFNG	3
BP	GO:0001935	endothelial cell proliferation	3/71	191/18670	0.0362813115572855	0.068327084440424	0.0288782733280899	AKT1/HMOX1/CCL2	3
BP	GO:0006110	regulation of glycolytic process	2/71	79/18670	0.0364031518258602	0.068327084440424	0.0288782733280899	TP53/IFNG	2
BP	GO:0021675	nerve development	2/71	79/18670	0.0364031518258602	0.068327084440424	0.0288782733280899	VCAM1/ERBB3	2
BP	GO:0015711	organic anion transport	5/71	482/18670	0.0364132842478476	0.068327084440424	0.0288782733280899	NOS2/AKT1/IL1B/CA2/ABAT	5
BP	GO:0022604	regulation of cell morphogenesis	5/71	484/18670	0.036965327779963	0.068327084440424	0.0288782733280899	F2/ICAM1/PPP3CA/CCL2/SPP1	5
BP	GO:0045333	cellular respiration	3/71	193/18670	0.0372407811191373	0.068327084440424	0.0288782733280899	NOS2/IFNG/CYCS	3
BP	GO:0000012	single strand break repair	1/71	10/18670	0.0373935498483048	0.068327084440424	0.0288782733280899	PARP1	1
BP	GO:0001820	serotonin secretion	1/71	10/18670	0.0373935498483048	0.068327084440424	0.0288782733280899	MAOB	1
BP	GO:0002291	T cell activation via T cell receptor contact with antigen bound to MHC molecule on antigen presenting cell	1/71	10/18670	0.0373935498483048	0.068327084440424	0.0288782733280899	ICAM1	1
BP	GO:0006570	tyrosine metabolic process	1/71	10/18670	0.0373935498483048	0.068327084440424	0.0288782733280899	TYR	1
BP	GO:0010615	positive regulation of cardiac muscle adaptation	1/71	10/18670	0.0373935498483048	0.068327084440424	0.0288782733280899	PPP3CA	1
BP	GO:0010739	positive regulation of protein kinase A signaling	1/71	10/18670	0.0373935498483048	0.068327084440424	0.0288782733280899	ADRB2	1
BP	GO:0010944	negative regulation of transcription by competitive promoter binding	1/71	10/18670	0.0373935498483048	0.068327084440424	0.0288782733280899	CREB1	1
BP	GO:0014041	regulation of neuron maturation	1/71	10/18670	0.0373935498483048	0.068327084440424	0.0288782733280899	BCL2	1
BP	GO:0016102	diterpenoid biosynthetic process	1/71	10/18670	0.0373935498483048	0.068327084440424	0.0288782733280899	CYP1A1	1
BP	GO:0019062	virion attachment to host cell	1/71	10/18670	0.0373935498483048	0.068327084440424	0.0288782733280899	ICAM1	1
BP	GO:0021548	pons development	1/71	10/18670	0.0373935498483048	0.068327084440424	0.0288782733280899	BCL2	1
BP	GO:0030388	fructose 1,6-bisphosphate metabolic process	1/71	10/18670	0.0373935498483048	0.068327084440424	0.0288782733280899	IFNG	1
BP	GO:0031284	positive regulation of guanylate cyclase activity	1/71	10/18670	0.0373935498483048	0.068327084440424	0.0288782733280899	NOS2	1
BP	GO:0032025	response to cobalt ion	1/71	10/18670	0.0373935498483048	0.068327084440424	0.0288782733280899	CASP3	1
BP	GO:0032308	positive regulation of prostaglandin secretion	1/71	10/18670	0.0373935498483048	0.068327084440424	0.0288782733280899	IL1B	1
BP	GO:0033131	regulation of glucokinase activity	1/71	10/18670	0.0373935498483048	0.068327084440424	0.0288782733280899	BAD	1
BP	GO:0034085	establishment of sister chromatid cohesion	1/71	10/18670	0.0373935498483048	0.068327084440424	0.0288782733280899	RB1	1
BP	GO:0034350	regulation of glial cell apoptotic process	1/71	10/18670	0.0373935498483048	0.068327084440424	0.0288782733280899	CCL2	1
BP	GO:0035672	oligopeptide transmembrane transport	1/71	10/18670	0.0373935498483048	0.068327084440424	0.0288782733280899	CA2	1
BP	GO:0035865	cellular response to potassium ion	1/71	10/18670	0.0373935498483048	0.068327084440424	0.0288782733280899	SOD1	1
BP	GO:0043653	mitochondrial fragmentation involved in apoptotic process	1/71	10/18670	0.0373935498483048	0.068327084440424	0.0288782733280899	BAX	1
BP	GO:0044557	relaxation of smooth muscle	1/71	10/18670	0.0373935498483048	0.068327084440424	0.0288782733280899	SOD1	1
BP	GO:0045348	positive regulation of MHC class II biosynthetic process	1/71	10/18670	0.0373935498483048	0.068327084440424	0.0288782733280899	IFNG	1
BP	GO:0045625	regulation of T-helper 1 cell differentiation	1/71	10/18670	0.0373935498483048	0.068327084440424	0.0288782733280899	IL4R	1
BP	GO:0045792	negative regulation of cell size	1/71	10/18670	0.0373935498483048	0.068327084440424	0.0288782733280899	AKT1	1
BP	GO:0045945	positive regulation of transcription by RNA polymerase III	1/71	10/18670	0.0373935498483048	0.068327084440424	0.0288782733280899	AR	1
BP	GO:0046322	negative regulation of fatty acid oxidation	1/71	10/18670	0.0373935498483048	0.068327084440424	0.0288782733280899	AKT1	1
BP	GO:0048304	positive regulation of isotype switching to IgG isotypes	1/71	10/18670	0.0373935498483048	0.068327084440424	0.0288782733280899	IL2	1
BP	GO:0051901	positive regulation of mitochondrial depolarization	1/71	10/18670	0.0373935498483048	0.068327084440424	0.0288782733280899	PARP1	1
BP	GO:0060346	bone trabecula formation	1/71	10/18670	0.0373935498483048	0.068327084440424	0.0288782733280899	MMP2	1
BP	GO:0060513	prostatic bud formation	1/71	10/18670	0.0373935498483048	0.068327084440424	0.0288782733280899	AR	1
BP	GO:0060768	regulation of epithelial cell proliferation involved in prostate gland development	1/71	10/18670	0.0373935498483048	0.068327084440424	0.0288782733280899	AR	1
BP	GO:0070091	glucagon secretion	1/71	10/18670	0.0373935498483048	0.068327084440424	0.0288782733280899	IL6	1
BP	GO:0070472	regulation of uterine smooth muscle contraction	1/71	10/18670	0.0373935498483048	0.068327084440424	0.0288782733280899	ABAT	1
BP	GO:0070942	neutrophil mediated cytotoxicity	1/71	10/18670	0.0373935498483048	0.068327084440424	0.0288782733280899	F2	1
BP	GO:0071281	cellular response to iron ion	1/71	10/18670	0.0373935498483048	0.068327084440424	0.0288782733280899	HMOX1	1
BP	GO:0072203	cell proliferation involved in metanephros development	1/71	10/18670	0.0373935498483048	0.068327084440424	0.0288782733280899	MYC	1
BP	GO:0072610	interleukin-12 secretion	1/71	10/18670	0.0373935498483048	0.068327084440424	0.0288782733280899	MAPK14	1
BP	GO:0090557	establishment of endothelial intestinal barrier	1/71	10/18670	0.0373935498483048	0.068327084440424	0.0288782733280899	ICAM1	1
BP	GO:0097050	type B pancreatic cell apoptotic process	1/71	10/18670	0.0373935498483048	0.068327084440424	0.0288782733280899	IL6	1
BP	GO:0140052	cellular response to oxidised low-density lipoprotein particle stimulus	1/71	10/18670	0.0373935498483048	0.068327084440424	0.0288782733280899	AKT1	1
BP	GO:1900222	negative regulation of amyloid-beta clearance	1/71	10/18670	0.0373935498483048	0.068327084440424	0.0288782733280899	IFNG	1
BP	GO:1902101	positive regulation of metaphase/anaphase transition of cell cycle	1/71	10/18670	0.0373935498483048	0.068327084440424	0.0288782733280899	RB1	1
BP	GO:1903244	positive regulation of cardiac muscle hypertrophy in response to stress	1/71	10/18670	0.0373935498483048	0.068327084440424	0.0288782733280899	PPP3CA	1
BP	GO:1903800	positive regulation of production of miRNAs involved in gene silencing by miRNA	1/71	10/18670	0.0373935498483048	0.068327084440424	0.0288782733280899	TP53	1
BP	GO:1903897	regulation of PERK-mediated unfolded protein response	1/71	10/18670	0.0373935498483048	0.068327084440424	0.0288782733280899	PTPN1	1
BP	GO:2000317	negative regulation of T-helper 17 type immune response	1/71	10/18670	0.0373935498483048	0.068327084440424	0.0288782733280899	IL2	1
BP	GO:2000425	regulation of apoptotic cell clearance	1/71	10/18670	0.0373935498483048	0.068327084440424	0.0288782733280899	CCL2	1
BP	GO:2000628	regulation of miRNA metabolic process	1/71	10/18670	0.0373935498483048	0.068327084440424	0.0288782733280899	RELA	1
BP	GO:2000644	regulation of receptor catabolic process	1/71	10/18670	0.0373935498483048	0.068327084440424	0.0288782733280899	PTPN1	1
BP	GO:2001225	regulation of chloride transport	1/71	10/18670	0.0373935498483048	0.068327084440424	0.0288782733280899	CA2	1
BP	GO:0051168	nuclear export	3/71	194/18670	0.0377253936221512	0.068895295491477	0.029118426324149	TP53/IL1B/MDM2	3
BP	GO:0015849	organic acid transport	4/71	333/18670	0.0380142537595367	0.0693077554731885	0.0292927515157814	NOS2/AKT1/IL1B/ABAT	4
BP	GO:0016042	lipid catabolic process	4/71	333/18670	0.0380142537595367	0.0693077554731885	0.0292927515157814	AKT1/CYP3A4/IL1B/SPP1	4
BP	GO:0046942	carboxylic acid transport	4/71	333/18670	0.0380142537595367	0.0693077554731885	0.0292927515157814	NOS2/AKT1/IL1B/ABAT	4
BP	GO:0014855	striated muscle cell proliferation	2/71	81/18670	0.0380973999139174	0.0693826819624323	0.0293244190112353	MAPK14/MAPK1	2
BP	GO:0030811	regulation of nucleotide catabolic process	2/71	81/18670	0.0380973999139174	0.0693826819624323	0.0293244190112353	TP53/IFNG	2
BP	GO:0072524	pyridine-containing compound metabolic process	3/71	195/18670	0.0382132520007468	0.0695552849434442	0.02939736923447	PTGS2/TP53/IFNG	3
BP	GO:0010833	telomere maintenance via telomere lengthening	2/71	82/18670	0.0389557149142326	0.070711693738706	0.0298861225530416	MAPK1/PARP1	2
BP	GO:0016925	protein sumoylation	2/71	82/18670	0.0389557149142326	0.070711693738706	0.0298861225530416	RELA/MDM2	2
BP	GO:0034502	protein localization to chromosome	2/71	82/18670	0.0389557149142326	0.070711693738706	0.0298861225530416	ESR1/RB1	2
BP	GO:0051702	interaction with symbiont	2/71	82/18670	0.0389557149142326	0.070711693738706	0.0298861225530416	F2/CALM1	2
BP	GO:0090049	regulation of cell migration involved in sprouting angiogenesis	2/71	82/18670	0.0389557149142326	0.070711693738706	0.0298861225530416	PTGS2/HMOX1	2
BP	GO:0002221	pattern recognition receptor signaling pathway	3/71	197/18670	0.0391986879095761	0.0710745440118687	0.0300394803239955	CD14/RELA/ESR1	3
BP	GO:0009156	ribonucleoside monophosphate biosynthetic process	3/71	197/18670	0.0391986879095761	0.0710745440118687	0.0300394803239955	TP53/IFNG/PARP1	3
BP	GO:0007626	locomotory behavior	3/71	198/18670	0.0396962559324546	0.0719372018545305	0.0304040805286293	DPP4/SOD1/ABAT	3
BP	GO:0046470	phosphatidylcholine metabolic process	2/71	83/18670	0.0398214009337863	0.0720848179273147	0.0304664700968714	PON1/ACHE	2
BP	GO:0060218	hematopoietic stem cell differentiation	2/71	83/18670	0.0398214009337863	0.0720848179273147	0.0304664700968714	TP53/NFE2L2	2
BP	GO:0007179	transforming growth factor beta receptor signaling pathway	3/71	199/18670	0.0401970508185992	0.0726853331996293	0.0307202763921878	TP53/PARP1/CREB1	3
BP	GO:0051453	regulation of intracellular pH	2/71	84/18670	0.0406943912469333	0.0726853331996293	0.0307202763921878	BCL2/CA2	2
BP	GO:0060420	regulation of heart growth	2/71	84/18670	0.0406943912469333	0.0726853331996293	0.0307202763921878	MAPK14/MAPK1	2
BP	GO:0042119	neutrophil activation	5/71	498/18670	0.0409749685070265	0.0726853331996293	0.0307202763921878	CD14/MAPK14/MAPK1/CXCL8/MPO	5
BP	GO:0002887	negative regulation of myeloid leukocyte mediated immunity	1/71	11/18670	0.0410562003285179	0.0726853331996293	0.0307202763921878	HMOX1	1
BP	GO:0006857	oligopeptide transport	1/71	11/18670	0.0410562003285179	0.0726853331996293	0.0307202763921878	CA2	1
BP	GO:0010269	response to selenium ion	1/71	11/18670	0.0410562003285179	0.0726853331996293	0.0307202763921878	MAOB	1
BP	GO:0014883	transition between fast and slow fiber	1/71	11/18670	0.0410562003285179	0.0726853331996293	0.0307202763921878	PPP3CA	1
BP	GO:0019371	cyclooxygenase pathway	1/71	11/18670	0.0410562003285179	0.0726853331996293	0.0307202763921878	PTGS2	1
BP	GO:0031915	positive regulation of synaptic plasticity	1/71	11/18670	0.0410562003285179	0.0726853331996293	0.0307202763921878	PTGS2	1
BP	GO:0032306	regulation of prostaglandin secretion	1/71	11/18670	0.0410562003285179	0.0726853331996293	0.0307202763921878	IL1B	1
BP	GO:0033234	negative regulation of protein sumoylation	1/71	11/18670	0.0410562003285179	0.0726853331996293	0.0307202763921878	RELA	1
BP	GO:0033327	Leydig cell differentiation	1/71	11/18670	0.0410562003285179	0.0726853331996293	0.0307202763921878	AR	1
BP	GO:0033629	negative regulation of cell adhesion mediated by integrin	1/71	11/18670	0.0410562003285179	0.0726853331996293	0.0307202763921878	SERPINE1	1
BP	GO:0033632	regulation of cell-cell adhesion mediated by integrin	1/71	11/18670	0.0410562003285179	0.0726853331996293	0.0307202763921878	DPP4	1
BP	GO:0035747	natural killer cell chemotaxis	1/71	11/18670	0.0410562003285179	0.0726853331996293	0.0307202763921878	CCL2	1
BP	GO:0040015	negative regulation of multicellular organism growth	1/71	11/18670	0.0410562003285179	0.0726853331996293	0.0307202763921878	ADRB2	1
BP	GO:0045628	regulation of T-helper 2 cell differentiation	1/71	11/18670	0.0410562003285179	0.0726853331996293	0.0307202763921878	IL4R	1
BP	GO:0046007	negative regulation of activated T cell proliferation	1/71	11/18670	0.0410562003285179	0.0726853331996293	0.0307202763921878	CASP3	1
BP	GO:0048742	regulation of skeletal muscle fiber development	1/71	11/18670	0.0410562003285179	0.0726853331996293	0.0307202763921878	BCL2	1
BP	GO:0051974	negative regulation of telomerase activity	1/71	11/18670	0.0410562003285179	0.0726853331996293	0.0307202763921878	TP53	1
BP	GO:0060088	auditory receptor cell stereocilium organization	1/71	11/18670	0.0410562003285179	0.0726853331996293	0.0307202763921878	SOD1	1
BP	GO:0060315	negative regulation of ryanodine-sensitive calcium-release channel activity	1/71	11/18670	0.0410562003285179	0.0726853331996293	0.0307202763921878	CALM1	1
BP	GO:0060439	trachea morphogenesis	1/71	11/18670	0.0410562003285179	0.0726853331996293	0.0307202763921878	MAPK1	1
BP	GO:0060525	prostate glandular acinus development	1/71	11/18670	0.0410562003285179	0.0726853331996293	0.0307202763921878	ESR1	1
BP	GO:0060767	epithelial cell proliferation involved in prostate gland development	1/71	11/18670	0.0410562003285179	0.0726853331996293	0.0307202763921878	AR	1
BP	GO:0061307	cardiac neural crest cell differentiation involved in heart development	1/71	11/18670	0.0410562003285179	0.0726853331996293	0.0307202763921878	MAPK1	1
BP	GO:0061308	cardiac neural crest cell development involved in heart development	1/71	11/18670	0.0410562003285179	0.0726853331996293	0.0307202763921878	MAPK1	1
BP	GO:0070213	protein auto-ADP-ribosylation	1/71	11/18670	0.0410562003285179	0.0726853331996293	0.0307202763921878	PARP1	1
BP	GO:0070471	uterine smooth muscle contraction	1/71	11/18670	0.0410562003285179	0.0726853331996293	0.0307202763921878	ABAT	1
BP	GO:0070673	response to interleukin-18	1/71	11/18670	0.0410562003285179	0.0726853331996293	0.0307202763921878	AKT1	1
BP	GO:0072584	caveolin-mediated endocytosis	1/71	11/18670	0.0410562003285179	0.0726853331996293	0.0307202763921878	MAPK1	1
BP	GO:1900102	negative regulation of endoplasmic reticulum unfolded protein response	1/71	11/18670	0.0410562003285179	0.0726853331996293	0.0307202763921878	PTPN1	1
BP	GO:1901096	regulation of autophagosome maturation	1/71	11/18670	0.0410562003285179	0.0726853331996293	0.0307202763921878	ADRB2	1
BP	GO:1903299	regulation of hexokinase activity	1/71	11/18670	0.0410562003285179	0.0726853331996293	0.0307202763921878	BAD	1
BP	GO:1904321	response to forskolin	1/71	11/18670	0.0410562003285179	0.0726853331996293	0.0307202763921878	AHR	1
BP	GO:1904322	cellular response to forskolin	1/71	11/18670	0.0410562003285179	0.0726853331996293	0.0307202763921878	AHR	1
BP	GO:1905820	positive regulation of chromosome separation	1/71	11/18670	0.0410562003285179	0.0726853331996293	0.0307202763921878	RB1	1
BP	GO:1990440	positive regulation of transcription from RNA polymerase II promoter in response to endoplasmic reticulum stress	1/71	11/18670	0.0410562003285179	0.0726853331996293	0.0307202763921878	TP53	1
BP	GO:2000551	regulation of T-helper 2 cell cytokine production	1/71	11/18670	0.0410562003285179	0.0726853331996293	0.0307202763921878	IL6	1
BP	GO:2001269	positive regulation of cysteine-type endopeptidase activity involved in apoptotic signaling pathway	1/71	11/18670	0.0410562003285179	0.0726853331996293	0.0307202763921878	BAX	1
BP	GO:0002028	regulation of sodium ion transport	2/71	85/18670	0.0415746195161692	0.0734848657757677	0.0310581968589768	ADRB2/AKT1	2
BP	GO:0014031	mesenchymal cell development	2/71	85/18670	0.0415746195161692	0.0734848657757677	0.0310581968589768	BCL2/MAPK1	2
BP	GO:0034308	primary alcohol metabolic process	2/71	85/18670	0.0415746195161692	0.0734848657757677	0.0310581968589768	CYP3A4/CYP1A1	2
BP	GO:0006575	cellular modified amino acid metabolic process	3/71	202/18670	0.0417187459585101	0.0737001400765971	0.031149182010045	GSTM1/SOD1/NFE2L2	3
BP	GO:0001942	hair follicle development	2/71	86/18670	0.0424620197902123	0.0748529195019769	0.0316364013844081	BCL2/RELA	2
BP	GO:0032760	positive regulation of tumor necrosis factor production	2/71	86/18670	0.0424620197902123	0.0748529195019769	0.0316364013844081	CD14/IFNG	2
BP	GO:0034637	cellular carbohydrate biosynthetic process	2/71	86/18670	0.0424620197902123	0.0748529195019769	0.0316364013844081	AKT1/IGF2	2
BP	GO:0060291	long-term synaptic potentiation	2/71	86/18670	0.0424620197902123	0.0748529195019769	0.0316364013844081	MAPK1/CREB1	2
BP	GO:0014068	positive regulation of phosphatidylinositol 3-kinase signaling	2/71	87/18670	0.0433565265020936	0.0763889682097752	0.0322856085735095	F2/ERBB3	2
BP	GO:0007178	transmembrane receptor protein serine/threonine kinase signaling pathway	4/71	349/18670	0.0439011091750961	0.0767569530414783	0.0324411364529374	MAPK14/TP53/PARP1/CREB1	4
BP	GO:0009791	post-embryonic development	2/71	88/18670	0.0442580744672555	0.0767569530414783	0.0324411364529374	BCL2/BAX	2
BP	GO:0022404	molting cycle process	2/71	88/18670	0.0442580744672555	0.0767569530414783	0.0324411364529374	BCL2/RELA	2
BP	GO:0022405	hair cycle process	2/71	88/18670	0.0442580744672555	0.0767569530414783	0.0324411364529374	BCL2/RELA	2
BP	GO:0043470	regulation of carbohydrate catabolic process	2/71	88/18670	0.0442580744672555	0.0767569530414783	0.0324411364529374	TP53/IFNG	2
BP	GO:0043506	regulation of JUN kinase activity	2/71	88/18670	0.0442580744672555	0.0767569530414783	0.0324411364529374	PTPN1/CD40LG	2
BP	GO:0045921	positive regulation of exocytosis	2/71	88/18670	0.0442580744672555	0.0767569530414783	0.0324411364529374	IFNG/IL4R	2
BP	GO:0061097	regulation of protein tyrosine kinase activity	2/71	88/18670	0.0442580744672555	0.0767569530414783	0.0324411364529374	PTPN1/ERBB3	2
BP	GO:0098773	skin epidermis development	2/71	88/18670	0.0442580744672555	0.0767569530414783	0.0324411364529374	BCL2/RELA	2
BP	GO:1903321	negative regulation of protein modification by small protein conjugation or removal	2/71	88/18670	0.0442580744672555	0.0767569530414783	0.0324411364529374	RELA/AKT1	2
BP	GO:1903557	positive regulation of tumor necrosis factor superfamily cytokine production	2/71	88/18670	0.0442580744672555	0.0767569530414783	0.0324411364529374	CD14/IFNG	2
BP	GO:0006733	oxidoreduction coenzyme metabolic process	3/71	207/18670	0.0443189533396748	0.0767569530414783	0.0324411364529374	PTGS2/TP53/IFNG	3
BP	GO:0002024	diet induced thermogenesis	1/71	12/18670	0.0447051102259761	0.0767569530414783	0.0324411364529374	ADRB2	1
BP	GO:0002903	negative regulation of B cell apoptotic process	1/71	12/18670	0.0447051102259761	0.0767569530414783	0.0324411364529374	IL2	1
BP	GO:0006527	arginine catabolic process	1/71	12/18670	0.0447051102259761	0.0767569530414783	0.0324411364529374	NOS2	1
BP	GO:0006983	ER overload response	1/71	12/18670	0.0447051102259761	0.0767569530414783	0.0324411364529374	TP53	1
BP	GO:0009886	post-embryonic animal morphogenesis	1/71	12/18670	0.0447051102259761	0.0767569530414783	0.0324411364529374	BAX	1
BP	GO:0010649	regulation of cell communication by electrical coupling	1/71	12/18670	0.0447051102259761	0.0767569530414783	0.0324411364529374	CALM1	1
BP	GO:0019755	one-carbon compound transport	1/71	12/18670	0.0447051102259761	0.0767569530414783	0.0324411364529374	CA2	1
BP	GO:0031282	regulation of guanylate cyclase activity	1/71	12/18670	0.0447051102259761	0.0767569530414783	0.0324411364529374	NOS2	1
BP	GO:0032230	positive regulation of synaptic transmission, GABAergic	1/71	12/18670	0.0447051102259761	0.0767569530414783	0.0324411364529374	CA2	1
BP	GO:0034086	maintenance of sister chromatid cohesion	1/71	12/18670	0.0447051102259761	0.0767569530414783	0.0324411364529374	RB1	1
BP	GO:0034088	maintenance of mitotic sister chromatid cohesion	1/71	12/18670	0.0447051102259761	0.0767569530414783	0.0324411364529374	RB1	1
BP	GO:0038110	interleukin-2-mediated signaling pathway	1/71	12/18670	0.0447051102259761	0.0767569530414783	0.0324411364529374	IL2	1
BP	GO:0042118	endothelial cell activation	1/71	12/18670	0.0447051102259761	0.0767569530414783	0.0324411364529374	CXCL10	1
BP	GO:0042659	regulation of cell fate specification	1/71	12/18670	0.0447051102259761	0.0767569530414783	0.0324411364529374	AR	1
BP	GO:0044650	adhesion of symbiont to host cell	1/71	12/18670	0.0447051102259761	0.0767569530414783	0.0324411364529374	ICAM1	1
BP	GO:0045472	response to ether	1/71	12/18670	0.0447051102259761	0.0767569530414783	0.0324411364529374	MDM2	1
BP	GO:0045579	positive regulation of B cell differentiation	1/71	12/18670	0.0447051102259761	0.0767569530414783	0.0324411364529374	BAD	1
BP	GO:0048302	regulation of isotype switching to IgG isotypes	1/71	12/18670	0.0447051102259761	0.0767569530414783	0.0324411364529374	IL2	1
BP	GO:0051095	regulation of helicase activity	1/71	12/18670	0.0447051102259761	0.0767569530414783	0.0324411364529374	TP53	1
BP	GO:0051873	killing by host of symbiont cells	1/71	12/18670	0.0447051102259761	0.0767569530414783	0.0324411364529374	F2	1
BP	GO:0051956	negative regulation of amino acid transport	1/71	12/18670	0.0447051102259761	0.0767569530414783	0.0324411364529374	ABAT	1
BP	GO:0060391	positive regulation of SMAD protein signal transduction	1/71	12/18670	0.0447051102259761	0.0767569530414783	0.0324411364529374	PARP1	1
BP	GO:0060442	branching involved in prostate gland morphogenesis	1/71	12/18670	0.0447051102259761	0.0767569530414783	0.0324411364529374	ESR1	1
BP	GO:0060742	epithelial cell differentiation involved in prostate gland development	1/71	12/18670	0.0447051102259761	0.0767569530414783	0.0324411364529374	AR	1
BP	GO:0070243	regulation of thymocyte apoptotic process	1/71	12/18670	0.0447051102259761	0.0767569530414783	0.0324411364529374	TP53	1
BP	GO:0070486	leukocyte aggregation	1/71	12/18670	0.0447051102259761	0.0767569530414783	0.0324411364529374	IL1B	1
BP	GO:0071639	positive regulation of monocyte chemotactic protein-1 production	1/71	12/18670	0.0447051102259761	0.0767569530414783	0.0324411364529374	IL1B	1
BP	GO:0072520	seminiferous tubule development	1/71	12/18670	0.0447051102259761	0.0767569530414783	0.0324411364529374	AR	1
BP	GO:0072540	T-helper 17 cell lineage commitment	1/71	12/18670	0.0447051102259761	0.0767569530414783	0.0324411364529374	IL6	1
BP	GO:0090331	negative regulation of platelet aggregation	1/71	12/18670	0.0447051102259761	0.0767569530414783	0.0324411364529374	ABAT	1
BP	GO:0097284	hepatocyte apoptotic process	1/71	12/18670	0.0447051102259761	0.0767569530414783	0.0324411364529374	RB1	1
BP	GO:0150065	regulation of deacetylase activity	1/71	12/18670	0.0447051102259761	0.0767569530414783	0.0324411364529374	MAPK8	1
BP	GO:1900402	regulation of carbohydrate metabolic process by regulation of transcription from RNA polymerase II promoter	1/71	12/18670	0.0447051102259761	0.0767569530414783	0.0324411364529374	TP53	1
BP	GO:1902337	regulation of apoptotic process involved in morphogenesis	1/71	12/18670	0.0447051102259761	0.0767569530414783	0.0324411364529374	BAX	1
BP	GO:1904181	positive regulation of membrane depolarization	1/71	12/18670	0.0447051102259761	0.0767569530414783	0.0324411364529374	PARP1	1
BP	GO:2000105	positive regulation of DNA-dependent DNA replication	1/71	12/18670	0.0447051102259761	0.0767569530414783	0.0324411364529374	CDK2	1
BP	GO:2000121	regulation of removal of superoxide radicals	1/71	12/18670	0.0447051102259761	0.0767569530414783	0.0324411364529374	NFE2L2	1
BP	GO:0009124	nucleoside monophosphate biosynthetic process	3/71	208/18670	0.0448485519862008	0.07696319373607	0.0325283035726612	TP53/IFNG/PARP1	3
BP	GO:0097306	cellular response to alcohol	2/71	89/18670	0.0451665988816597	0.0774686987055493	0.0327419539983582	AKT1/AHR	2
BP	GO:0035303	regulation of dephosphorylation	3/71	209/18670	0.0453813227893287	0.0777561605424634	0.0328634490330986	CALM1/IFNG/IGFBP3	3
BP	GO:0071229	cellular response to acid chemical	3/71	209/18670	0.0453813227893287	0.0777561605424634	0.0328634490330986	AKT1/MMP2/CREB1	3
BP	GO:0001656	metanephros development	2/71	90/18670	0.0460820353199024	0.0787115510122556	0.0332672424533457	BCL2/MYC	2
BP	GO:0010717	regulation of epithelial to mesenchymal transition	2/71	90/18670	0.0460820353199024	0.0787115510122556	0.0332672424533457	IL6/IL1B	2
BP	GO:0015844	monoamine transport	2/71	90/18670	0.0460820353199024	0.0787115510122556	0.0332672424533457	MAOB/ABAT	2
BP	GO:0030901	midbrain development	2/71	90/18670	0.0460820353199024	0.0787115510122556	0.0332672424533457	CALM1/MAOB	2
BP	GO:0031058	positive regulation of histone modification	2/71	90/18670	0.0460820353199024	0.0787115510122556	0.0332672424533457	TP53/IL1B	2
BP	GO:0045778	positive regulation of ossification	2/71	90/18670	0.0460820353199024	0.0787115510122556	0.0332672424533457	IL6/ADRB2	2
BP	GO:0051899	membrane depolarization	2/71	91/18670	0.0470043197333395	0.080245346673575	0.0339154973979225	BCL2/PARP1	2
BP	GO:0015893	drug transport	3/71	214/18670	0.0480925458409287	0.0810584807787971	0.0342591665173544	MYC/CA2/ABAT	3
BP	GO:1903050	regulation of proteolysis involved in cellular protein catabolic process	3/71	214/18670	0.0480925458409287	0.0810584807787971	0.0342591665173544	AKT1/NFE2L2/MDM2	3
BP	GO:0002093	auditory receptor cell morphogenesis	1/71	13/18670	0.0483403303553553	0.0810584807787971	0.0342591665173544	SOD1	1
BP	GO:0002679	respiratory burst involved in defense response	1/71	13/18670	0.0483403303553553	0.0810584807787971	0.0342591665173544	MPO	1
BP	GO:0005513	detection of calcium ion	1/71	13/18670	0.0483403303553553	0.0810584807787971	0.0342591665173544	CALM1	1
BP	GO:0007171	activation of transmembrane receptor protein tyrosine kinase activity	1/71	13/18670	0.0483403303553553	0.0810584807787971	0.0342591665173544	ADRB2	1
BP	GO:0007183	SMAD protein complex assembly	1/71	13/18670	0.0483403303553553	0.0810584807787971	0.0342591665173544	PARP1	1
BP	GO:0009635	response to herbicide	1/71	13/18670	0.0483403303553553	0.0810584807787971	0.0342591665173544	CYP1A1	1
BP	GO:0010763	positive regulation of fibroblast migration	1/71	13/18670	0.0483403303553553	0.0810584807787971	0.0342591665173544	AKT1	1
BP	GO:0010870	positive regulation of receptor biosynthetic process	1/71	13/18670	0.0483403303553553	0.0810584807787971	0.0342591665173544	IFNG	1
BP	GO:0015812	gamma-aminobutyric acid transport	1/71	13/18670	0.0483403303553553	0.0810584807787971	0.0342591665173544	ABAT	1
BP	GO:0030948	negative regulation of vascular endothelial growth factor receptor signaling pathway	1/71	13/18670	0.0483403303553553	0.0810584807787971	0.0342591665173544	PTPN1	1
BP	GO:0032725	positive regulation of granulocyte macrophage colony-stimulating factor production	1/71	13/18670	0.0483403303553553	0.0810584807787971	0.0342591665173544	IL1B	1
BP	GO:0033004	negative regulation of mast cell activation	1/71	13/18670	0.0483403303553553	0.0810584807787971	0.0342591665173544	HMOX1	1
BP	GO:0033127	regulation of histone phosphorylation	1/71	13/18670	0.0483403303553553	0.0810584807787971	0.0342591665173544	IL1B	1
BP	GO:0034374	low-density lipoprotein particle remodeling	1/71	13/18670	0.0483403303553553	0.0810584807787971	0.0342591665173544	MPO	1
BP	GO:0035641	locomotory exploration behavior	1/71	13/18670	0.0483403303553553	0.0810584807787971	0.0342591665173544	DPP4	1
BP	GO:0035745	T-helper 2 cell cytokine production	1/71	13/18670	0.0483403303553553	0.0810584807787971	0.0342591665173544	IL6	1
BP	GO:0043301	negative regulation of leukocyte degranulation	1/71	13/18670	0.0483403303553553	0.0810584807787971	0.0342591665173544	HMOX1	1
BP	GO:0045779	negative regulation of bone resorption	1/71	13/18670	0.0483403303553553	0.0810584807787971	0.0342591665173544	IL6	1
BP	GO:0048291	isotype switching to IgG isotypes	1/71	13/18670	0.0483403303553553	0.0810584807787971	0.0342591665173544	IL2	1
BP	GO:0048681	negative regulation of axon regeneration	1/71	13/18670	0.0483403303553553	0.0810584807787971	0.0342591665173544	SPP1	1
BP	GO:0050722	regulation of interleukin-1 beta biosynthetic process	1/71	13/18670	0.0483403303553553	0.0810584807787971	0.0342591665173544	IFNG	1
BP	GO:0060576	intestinal epithelial cell development	1/71	13/18670	0.0483403303553553	0.0810584807787971	0.0342591665173544	CDKN1A	1
BP	GO:0060601	lateral sprouting from an epithelium	1/71	13/18670	0.0483403303553553	0.0810584807787971	0.0342591665173544	AR	1
BP	GO:0060712	spongiotrophoblast layer development	1/71	13/18670	0.0483403303553553	0.0810584807787971	0.0342591665173544	AKT1	1
BP	GO:0061042	vascular wound healing	1/71	13/18670	0.0483403303553553	0.0810584807787971	0.0342591665173544	SERPINE1	1
BP	GO:0061430	bone trabecula morphogenesis	1/71	13/18670	0.0483403303553553	0.0810584807787971	0.0342591665173544	MMP2	1
BP	GO:0061478	response to platelet aggregation inhibitor	1/71	13/18670	0.0483403303553553	0.0810584807787971	0.0342591665173544	AHR	1
BP	GO:0070431	nucleotide-binding oligomerization domain containing 2 signaling pathway	1/71	13/18670	0.0483403303553553	0.0810584807787971	0.0342591665173544	RELA	1
BP	GO:0071352	cellular response to interleukin-2	1/71	13/18670	0.0483403303553553	0.0810584807787971	0.0342591665173544	IL2	1
BP	GO:1901550	regulation of endothelial cell development	1/71	13/18670	0.0483403303553553	0.0810584807787971	0.0342591665173544	IL1B	1
BP	GO:1902894	negative regulation of pri-miRNA transcription by RNA polymerase II	1/71	13/18670	0.0483403303553553	0.0810584807787971	0.0342591665173544	RELA	1
BP	GO:1903140	regulation of establishment of endothelial barrier	1/71	13/18670	0.0483403303553553	0.0810584807787971	0.0342591665173544	IL1B	1
BP	GO:1903960	negative regulation of anion transmembrane transport	1/71	13/18670	0.0483403303553553	0.0810584807787971	0.0342591665173544	AKT1	1
BP	GO:0003073	regulation of systemic arterial blood pressure	2/71	93/18670	0.0488691781638238	0.0818205418267979	0.034581249735409	ADRB2/AR	2
BP	GO:0035249	synaptic transmission, glutamatergic	2/71	93/18670	0.0488691781638238	0.0818205418267979	0.034581249735409	PTGS2/CCL2	2
BP	GO:0072080	nephron tubule development	2/71	93/18670	0.0488691781638238	0.0818205418267979	0.034581249735409	BCL2/MYC	2
BP	GO:0001654	eye development	4/71	362/18670	0.0490429838115728	0.0820699019159181	0.0346866411606352	BCL2/BAX/ACHE/CYP1A1	4
BP	GO:0017157	regulation of exocytosis	3/71	217/18670	0.0497569473775038	0.0832224664702294	0.0351737697202724	HMOX1/IFNG/IL4R	3
BP	GO:0044728	DNA methylation or demethylation	2/71	94/18670	0.0498116259506183	0.0832295522212862	0.03517676449544	MYC/PARP1	2
BP	GO:0060993	kidney morphogenesis	2/71	94/18670	0.0498116259506183	0.0832295522212862	0.03517676449544	BCL2/MYC	2
CC	GO:0000307	cyclin-dependent protein kinase holoenzyme complex	4/71	42/19717	1.55796036240317e-05	0.00104837915385455	0.000770064502831279	CDK2/CDKN1A/RB1/PCNA	4
CC	GO:0045121	membrane raft	8/71	315/19717	1.7240253322192e-05	0.00104837915385455	0.000770064502831279	CD14/PTGS2/CASP3/DPP4/HMOX1/ICAM1/SELE/MAPK1	8
CC	GO:0098857	membrane microdomain	8/71	316/19717	1.76376930110971e-05	0.00104837915385455	0.000770064502831279	CD14/PTGS2/CASP3/DPP4/HMOX1/ICAM1/SELE/MAPK1	8
CC	GO:0098589	membrane region	8/71	328/19717	2.30413000847154e-05	0.00104837915385455	0.000770064502831279	CD14/PTGS2/CASP3/DPP4/HMOX1/ICAM1/SELE/MAPK1	8
CC	GO:0005901	caveola	4/71	80/19717	0.00019858907467591	0.00722864231820312	0.00530964473344011	PTGS2/HMOX1/SELE/MAPK1	4
CC	GO:1902554	serine/threonine protein kinase complex	4/71	88/19717	0.000286529211932948	0.00869138609529942	0.00638407191499726	CDK2/CDKN1A/RB1/PCNA	4
CC	GO:0005667	transcription factor complex	7/71	365/19717	0.000338251194242206	0.00879453105029734	0.00645983483740754	RELA/AHR/CDK2/RB1/TP53/PARP1/CREB1	7
CC	GO:0000790	nuclear chromatin	7/71	377/19717	0.000410759368072189	0.00922021766062079	0.00677251383978508	AR/RELA/ESR1/RB1/TP53/MYC/CREB1	7
CC	GO:0005741	mitochondrial outer membrane	5/71	178/19717	0.000455944829371358	0.00922021766062079	0.00677251383978508	BCL2/BAX/MAOB/MAOA/BAD	5
CC	GO:0044853	plasma membrane raft	4/71	109/19717	0.000645853883373169	0.0106859460703561	0.0078491333194634	PTGS2/HMOX1/SELE/MAPK1	4
CC	GO:1902911	protein kinase complex	4/71	109/19717	0.000645853883373169	0.0106859460703561	0.0078491333194634	CDK2/CDKN1A/RB1/PCNA	4
CC	GO:0031968	organelle outer membrane	5/71	201/19717	0.000790563734488808	0.0115710913217771	0.00849929784769051	BCL2/BAX/MAOB/MAOA/BAD	5
CC	GO:0019867	outer membrane	5/71	203/19717	0.000826506522984077	0.0115710913217771	0.00849929784769051	BCL2/BAX/MAOB/MAOA/BAD	5
CC	GO:0061695	transferase complex, transferring phosphorus-containing groups	5/71	259/19717	0.00241917294577983	0.0314492482951378	0.023100373241657	CDK2/CDKN1A/RB1/TP53/PCNA	5
CC	GO:0000781	chromosome, telomeric region	4/71	161/19717	0.00272099032423032	0.0329753723638459	0.0242213550619342	CDK2/PARP1/CHEK2/PCNA	4
CC	GO:0009897	external side of plasma membrane	6/71	393/19717	0.00290482710054145	0.0329753723638459	0.0242213550619342	CD14/F2/ICAM1/VCAM1/CXCL10/CD40LG	6
CC	GO:0046930	pore complex	2/71	23/19717	0.00308011719882077	0.0329753723638459	0.0242213550619342	BCL2/BAX	2
CC	GO:0062023	collagen-containing extracellular matrix	6/71	406/19717	0.00340897812320596	0.0344685565790824	0.0253181416167928	PRSS1/F2/ACHE/ICAM1/MMP2/SERPINE1	6
CC	GO:0005788	endoplasmic reticulum lumen	5/71	309/19717	0.00512620870481852	0.0481617018470799	0.035376148840828	IL6/PTGS2/F2/SPP1/IGFBP3	5
CC	GO:0016605	PML body	3/71	99/19717	0.00548194370274313	0.0481617018470799	0.035376148840828	RB1/TP53/CHEK2	3
CC	GO:0032839	dendrite cytoplasm	2/71	32/19717	0.00591366238441319	0.0481617018470799	0.035376148840828	MAPK1/SOD1	2
CC	GO:0034774	secretory granule lumen	5/71	321/19717	0.00600768263546218	0.0481617018470799	0.035376148840828	MAPK14/MAPK1/SERPINE1/MPO/IGF2	5
CC	GO:0032993	protein-DNA complex	4/71	202/19717	0.00608636891474087	0.0481617018470799	0.035376148840828	ESR1/NFE2L2/PARP1/PCNA	4
CC	GO:0060205	cytoplasmic vesicle lumen	5/71	338/19717	0.00743252671303596	0.0547679759133265	0.0402286462752601	MAPK14/MAPK1/SERPINE1/MPO/IGF2	5
[truncated: 113 more rows]
