# Supplementary material for: Mechanism of Action of a Chinese Herbal Compound Containing Quercetin, Luteolin, and Kaempferol in the Treatment of Vitiligo Based on Network Pharmacology and Experimental Verification
Source: Evid Based Complement Alternat Med. 2022 Dec 16;2022:7197533. doi: 10.1155/2022/7197533 (PMC9788887; doi:10.1155/2022/7197533)
Supplement: Supplementary Materials — Supplementary Table 1. Compounds and related targets genes of Baishi Tablet. Supplementary Table 2A. Summarized vitiligo-related genes. Supplementary Table 2B. Vitiligo-related genes from five database respectively. Supplementary Table 2C. The interacting genes between vitiligo and Baishi tablet. Supplementary 3. Go enrichment analysis results. Supplementary 4. Protein-protein interaction network results. Supplementary 5. Description about compound-vitiligo-target network. [file 7197533.f1.zip › Suppl 4 PPI.txt]

#node1	node2	node1_string_id	node2_string_id	neighborhood_on_chromosome	gene_fusion	phylogenetic_cooccurrence	homology	coexpression	experimentally_determined_interaction	database_annotated	automated_textmining	combined_score
ABAT	SOD1	9606.ENSP00000379845	9606.ENSP00000270142	0	0	0	0	0	0.726	0	0.071	0.734
ACHE	PON1	9606.ENSP00000303211	9606.ENSP00000222381	0	0	0	0	0.063	0	0	0.659	0.667
ACHE	TYR	9606.ENSP00000303211	9606.ENSP00000263321	0	0	0	0	0	0	0	0.468	0.468
ACHE	IL1B	9606.ENSP00000303211	9606.ENSP00000263341	0	0	0	0	0	0	0	0.508	0.508
ACHE	AKT1	9606.ENSP00000303211	9606.ENSP00000451828	0	0	0	0	0.048	0.062	0	0.449	0.465
ACHE	PTGS2	9606.ENSP00000303211	9606.ENSP00000356438	0	0	0	0	0	0.059	0	0.467	0.477
ACHE	CREB1	9606.ENSP00000303211	9606.ENSP00000387699	0	0	0	0	0	0	0	0.515	0.515
ACHE	CASP3	9606.ENSP00000303211	9606.ENSP00000311032	0	0	0	0	0	0	0	0.530	0.530
ACHE	IL6	9606.ENSP00000303211	9606.ENSP00000385675	0	0	0	0	0	0	0	0.536	0.536
ACHE	MAOA	9606.ENSP00000303211	9606.ENSP00000340684	0.047	0	0	0	0.096	0	0	0.603	0.628
ACHE	MAOB	9606.ENSP00000303211	9606.ENSP00000367309	0.047	0	0	0	0.107	0	0	0.662	0.687
ADRB2	MDM2	9606.ENSP00000305372	9606.ENSP00000258149	0	0	0	0	0	0.334	0	0.587	0.713
ADRB2	IL1B	9606.ENSP00000305372	9606.ENSP00000263341	0	0	0	0	0.088	0.213	0	0.413	0.541
ADRB2	CD14	9606.ENSP00000305372	9606.ENSP00000304236	0	0	0	0	0.070	0.064	0	0.398	0.430
ADRB2	CXCL8	9606.ENSP00000305372	9606.ENSP00000306512	0	0	0	0	0.076	0	0	0.381	0.403
ADRB2	IL6	9606.ENSP00000305372	9606.ENSP00000385675	0	0	0	0	0.063	0	0	0.470	0.482
ADRB2	AKT1	9606.ENSP00000305372	9606.ENSP00000451828	0	0	0	0	0	0.056	0	0.521	0.528
ADRB2	CREB1	9606.ENSP00000305372	9606.ENSP00000387699	0	0	0	0	0	0.058	0	0.521	0.530
ADRB2	F2	9606.ENSP00000305372	9606.ENSP00000308541	0	0	0	0	0	0.097	0.900	0.173	0.918
AHR	HMOX1	9606.ENSP00000242057	9606.ENSP00000216117	0	0	0	0	0.062	0	0	0.510	0.520
AHR	IL2	9606.ENSP00000242057	9606.ENSP00000226730	0	0	0	0	0	0	0	0.503	0.503
AHR	IFNG	9606.ENSP00000242057	9606.ENSP00000229135	0	0	0	0	0	0	0	0.486	0.486
AHR	GSTM1	9606.ENSP00000242057	9606.ENSP00000311469	0	0	0	0	0	0	0	0.452	0.452
AHR	AKT1	9606.ENSP00000242057	9606.ENSP00000451828	0	0	0	0	0	0	0	0.463	0.463
AHR	PTGS2	9606.ENSP00000242057	9606.ENSP00000356438	0	0	0	0	0.098	0	0	0.469	0.500
AHR	CXCL8	9606.ENSP00000242057	9606.ENSP00000306512	0	0	0	0	0.098	0	0	0.472	0.504
AHR	CREB1	9606.ENSP00000242057	9606.ENSP00000387699	0	0	0	0	0	0	0	0.514	0.514
AHR	TP53	9606.ENSP00000242057	9606.ENSP00000269305	0	0	0	0	0	0	0	0.518	0.518
AHR	MYC	9606.ENSP00000242057	9606.ENSP00000479618	0	0	0	0	0	0	0	0.529	0.529
AHR	IL1B	9606.ENSP00000242057	9606.ENSP00000263341	0	0	0	0	0.071	0	0	0.600	0.612
AHR	IL6	9606.ENSP00000242057	9606.ENSP00000385675	0	0	0	0	0.069	0	0	0.655	0.665
AHR	ESR2	9606.ENSP00000242057	9606.ENSP00000343925	0	0	0	0	0	0.057	0	0.668	0.674
AHR	CYP3A4	9606.ENSP00000242057	9606.ENSP00000337915	0	0	0	0	0.062	0	0	0.677	0.684
AHR	NQO1	9606.ENSP00000242057	9606.ENSP00000319788	0	0	0	0	0	0	0	0.688	0.688
AHR	NFE2L2	9606.ENSP00000242057	9606.ENSP00000380252	0	0	0	0	0	0.273	0	0.635	0.724
AHR	RB1	9606.ENSP00000242057	9606.ENSP00000267163	0	0	0	0	0	0.857	0	0.134	0.871
AHR	AR	9606.ENSP00000242057	9606.ENSP00000363822	0	0	0	0	0	0.470	0	0.833	0.908
AHR	RELA	9606.ENSP00000242057	9606.ENSP00000384273	0	0	0	0	0	0.486	0	0.980	0.989
AHR	CYP1A1	9606.ENSP00000242057	9606.ENSP00000369050	0	0	0	0	0.062	0	0.900	0.934	0.993
AHR	ESR1	9606.ENSP00000242057	9606.ENSP00000405330	0	0	0	0	0	0.873	0	0.990	0.998
AKT1	MAPK1	9606.ENSP00000451828	9606.ENSP00000215832	0	0	0.304	0.592	0.068	0.148	0.800	0.795	0.895
AKT1	HMOX1	9606.ENSP00000451828	9606.ENSP00000216117	0	0	0	0	0	0.230	0	0.749	0.799
AKT1	MMP2	9606.ENSP00000451828	9606.ENSP00000219070	0	0	0	0	0.062	0	0	0.767	0.772
AKT1	SERPINE1	9606.ENSP00000451828	9606.ENSP00000223095	0	0	0	0	0	0	0	0.619	0.619
AKT1	MPO	9606.ENSP00000451828	9606.ENSP00000225275	0	0	0	0	0	0.077	0	0.526	0.544
AKT1	CCL2	9606.ENSP00000451828	9606.ENSP00000225831	0	0	0	0	0	0	0	0.685	0.685
AKT1	IL2	9606.ENSP00000451828	9606.ENSP00000226730	0	0	0	0	0	0	0.900	0.682	0.966
AKT1	IFNG	9606.ENSP00000451828	9606.ENSP00000229135	0	0	0	0	0	0	0	0.605	0.605
AKT1	MAPK14	9606.ENSP00000451828	9606.ENSP00000229795	0	0	0.303	0.623	0.083	0.830	0.600	0.769	0.956
AKT1	MDM2	9606.ENSP00000451828	9606.ENSP00000258149	0	0	0	0	0	0.898	0.900	0.852	0.998
AKT1	TYR	9606.ENSP00000451828	9606.ENSP00000263321	0	0	0	0	0	0	0	0.407	0.407
AKT1	IL1A	9606.ENSP00000451828	9606.ENSP00000263339	0	0	0	0	0	0	0	0.521	0.521
AKT1	IL1B	9606.ENSP00000451828	9606.ENSP00000263341	0	0	0	0	0	0.056	0	0.774	0.777
AKT1	ICAM1	9606.ENSP00000451828	9606.ENSP00000264832	0	0	0	0	0	0	0	0.678	0.678
AKT1	CDK2	9606.ENSP00000451828	9606.ENSP00000266970	0	0	0.394	0.655	0.062	0.061	0	0.907	0.448
AKT1	ERBB3	9606.ENSP00000451828	9606.ENSP00000267101	0	0	0	0	0	0.320	0.900	0.845	0.988
AKT1	RB1	9606.ENSP00000451828	9606.ENSP00000267163	0	0	0	0	0	0.058	0.900	0.565	0.955
AKT1	TP53	9606.ENSP00000451828	9606.ENSP00000269305	0	0	0	0	0.053	0.201	0.900	0.877	0.989
AKT1	SOD1	9606.ENSP00000451828	9606.ENSP00000270142	0	0	0	0	0	0.090	0.900	0.569	0.957
AKT1	BAX	9606.ENSP00000451828	9606.ENSP00000293288	0	0	0	0	0.061	0.270	0	0.682	0.763
AKT1	VCAM1	9606.ENSP00000451828	9606.ENSP00000294728	0	0	0	0	0	0	0	0.659	0.659
AKT1	CXCL10	9606.ENSP00000451828	9606.ENSP00000305651	0	0	0	0	0	0	0	0.502	0.502
AKT1	CXCL8	9606.ENSP00000451828	9606.ENSP00000306512	0	0	0	0	0	0	0	0.714	0.714
AKT1	CYCS	9606.ENSP00000451828	9606.ENSP00000307786	0	0	0	0	0	0	0	0.806	0.806
AKT1	F2	9606.ENSP00000451828	9606.ENSP00000308541	0	0	0	0	0	0.056	0	0.521	0.529
AKT1	CASP3	9606.ENSP00000451828	9606.ENSP00000311032	0	0	0	0	0	0.475	0	0.882	0.935
AKT1	NQO1	9606.ENSP00000451828	9606.ENSP00000319788	0	0	0	0	0	0	0	0.569	0.569
AKT1	MMP1	9606.ENSP00000451828	9606.ENSP00000322788	0	0	0	0	0	0	0	0.560	0.560
AKT1	NOS2	9606.ENSP00000451828	9606.ENSP00000327251	0	0	0	0	0.063	0.077	0.900	0.646	0.965
AKT1	SELE	9606.ENSP00000451828	9606.ENSP00000331736	0	0	0	0	0	0.058	0	0.527	0.535
AKT1	CYP3A4	9606.ENSP00000451828	9606.ENSP00000337915	0	0	0	0	0	0.056	0	0.392	0.401
AKT1	ESR2	9606.ENSP00000451828	9606.ENSP00000343925	0	0	0	0	0	0.242	0	0.839	0.872
AKT1	CALM1	9606.ENSP00000451828	9606.ENSP00000349467	0	0	0	0	0	0.122	0	0.352	0.407
AKT1	DPP4	9606.ENSP00000451828	9606.ENSP00000353731	0	0	0	0	0.073	0	0	0.534	0.549
AKT1	PARP1	9606.ENSP00000451828	9606.ENSP00000355759	0	0	0	0	0.062	0	0	0.659	0.666
AKT1	PTGS2	9606.ENSP00000451828	9606.ENSP00000356438	0	0	0	0	0.062	0.077	0	0.738	0.754
AKT1	CASP7	9606.ENSP00000451828	9606.ENSP00000358327	0	0	0	0	0	0.123	0	0.691	0.717
AKT1	CD40LG	9606.ENSP00000451828	9606.ENSP00000359663	0	0	0	0	0	0.056	0.900	0.493	0.947
AKT1	PTPN1	9606.ENSP00000451828	9606.ENSP00000360683	0	0	0	0	0.091	0.284	0.900	0.672	0.975
AKT1	AR	9606.ENSP00000451828	9606.ENSP00000363822	0	0	0	0	0	0.870	0	0.847	0.979
AKT1	IGFBP3	9606.ENSP00000451828	9606.ENSP00000370473	0	0	0	0	0	0	0	0.602	0.602
AKT1	BAD	9606.ENSP00000451828	9606.ENSP00000378040	0	0	0	0	0.080	0.884	0.900	0.566	0.994
AKT1	PPP3CA	9606.ENSP00000451828	9606.ENSP00000378323	0	0	0	0	0	0.327	0	0.313	0.518
AKT1	SPP1	9606.ENSP00000451828	9606.ENSP00000378517	0	0	0	0	0	0.060	0	0.610	0.618
AKT1	MAPK8	9606.ENSP00000451828	9606.ENSP00000378974	0	0	0.417	0.573	0.084	0.315	0	0.810	0.642
AKT1	NFE2L2	9606.ENSP00000451828	9606.ENSP00000380252	0	0	0	0	0	0.315	0	0.686	0.776
AKT1	BCL2	9606.ENSP00000451828	9606.ENSP00000381185	0	0	0	0	0.062	0	0.900	0.457	0.944
AKT1	RELA	9606.ENSP00000451828	9606.ENSP00000384273	0	0	0	0	0.086	0.056	0	0.720	0.738
AKT1	CDKN1A	9606.ENSP00000451828	9606.ENSP00000384849	0	0	0	0	0	0.789	0.900	0.710	0.993
AKT1	IL6	9606.ENSP00000451828	9606.ENSP00000385675	0	0	0	0	0.056	0	0	0.829	0.832
AKT1	CREB1	9606.ENSP00000451828	9606.ENSP00000387699	0	0	0	0	0.064	0.270	0.900	0.822	0.986
AKT1	IGF2	9606.ENSP00000451828	9606.ENSP00000391826	0	0	0	0	0	0	0	0.686	0.686
AKT1	ESR1	9606.ENSP00000451828	9606.ENSP00000405330	0	0	0	0	0.055	0.297	0.900	0.805	0.985
AKT1	MYC	9606.ENSP00000451828	9606.ENSP00000479618	0	0	0	0	0.051	0.143	0.900	0.859	0.987
AR	MAPK1	9606.ENSP00000363822	9606.ENSP00000215832	0	0	0	0	0	0.497	0	0.324	0.645
AR	MMP2	9606.ENSP00000363822	9606.ENSP00000219070	0	0	0	0	0.061	0	0	0.403	0.415
AR	MAPK14	9606.ENSP00000363822	9606.ENSP00000229795	0	0	0	0	0	0.104	0.900	0.289	0.930
AR	MDM2	9606.ENSP00000363822	9606.ENSP00000258149	0	0	0	0	0	0.898	0	0.988	0.998
AR	CDK2	9606.ENSP00000363822	9606.ENSP00000266970	0	0	0	0	0	0.057	0	0.531	0.539
AR	ERBB3	9606.ENSP00000363822	9606.ENSP00000267101	0	0	0	0	0.062	0.316	0	0.631	0.743
AR	RB1	9606.ENSP00000363822	9606.ENSP00000267163	0	0	0	0	0	0.687	0.650	0.489	0.939
AR	TP53	9606.ENSP00000363822	9606.ENSP00000269305	0	0	0	0	0	0.474	0	0.776	0.877
AR	CXCL8	9606.ENSP00000363822	9606.ENSP00000306512	0	0	0	0	0	0	0	0.406	0.406
AR	CASP3	9606.ENSP00000363822	9606.ENSP00000311032	0	0	0	0	0	0.228	0	0.617	0.692
AR	CYP3A4	9606.ENSP00000363822	9606.ENSP00000337915	0	0	0	0	0	0.073	0	0.455	0.473
AR	CALM1	9606.ENSP00000363822	9606.ENSP00000349467	0	0	0	0	0	0.282	0	0.262	0.447
AR	PARP1	9606.ENSP00000363822	9606.ENSP00000355759	0	0	0	0	0	0	0	0.631	0.631
AR	PTGS2	9606.ENSP00000363822	9606.ENSP00000356438	0	0	0	0	0	0.056	0	0.412	0.421
AR	IGF2	9606.ENSP00000363822	9606.ENSP00000391826	0	0	0	0	0	0	0	0.406	0.406
AR	CYP1A1	9606.ENSP00000363822	9606.ENSP00000369050	0	0	0	0	0	0.073	0	0.394	0.415
AR	IGFBP3	9606.ENSP00000363822	9606.ENSP00000370473	0	0	0	0	0	0.117	0	0.426	0.471
AR	ESR1	9606.ENSP00000363822	9606.ENSP00000405330	0	0	0	0.656	0.062	0.213	0	0.984	0.490
AR	CDKN1A	9606.ENSP00000363822	9606.ENSP00000384849	0	0	0	0	0	0	0	0.505	0.505
AR	IL6	9606.ENSP00000363822	9606.ENSP00000385675	0	0	0	0	0	0	0	0.560	0.560
AR	RELA	9606.ENSP00000363822	9606.ENSP00000384273	0	0	0	0	0	0.489	0	0.501	0.734
AR	MYC	9606.ENSP00000363822	9606.ENSP00000479618	0	0	0	0	0	0.069	0	0.832	0.837
AR	CREB1	9606.ENSP00000363822	9606.ENSP00000387699	0	0	0	0	0	0.078	0	0.836	0.843
AR	MAPK8	9606.ENSP00000363822	9606.ENSP00000378974	0	0	0	0	0	0	0.900	0.285	0.925
BAD	MAPK1	9606.ENSP00000378040	9606.ENSP00000215832	0	0	0	0	0.062	0	0.900	0.169	0.915
BAD	TP53	9606.ENSP00000378040	9606.ENSP00000269305	0	0	0	0	0	0	0	0.640	0.640
BAD	BAX	9606.ENSP00000378040	9606.ENSP00000293288	0	0	0	0	0	0.535	0	0.681	0.845
BAD	CYCS	9606.ENSP00000378040	9606.ENSP00000307786	0	0	0	0	0	0	0.900	0.506	0.948
BAD	CASP3	9606.ENSP00000378040	9606.ENSP00000311032	0	0	0	0	0	0	0.900	0.505	0.948
BAD	PPP3CA	9606.ENSP00000378040	9606.ENSP00000378323	0	0	0	0	0	0.213	0.800	0	0.835
BAD	MAPK8	9606.ENSP00000378040	9606.ENSP00000378974	0	0	0	0	0	0.682	0.900	0.244	0.973
BAD	BCL2	9606.ENSP00000378040	9606.ENSP00000381185	0	0	0	0	0	0.905	0.900	0.559	0.995
BAX	HMOX1	9606.ENSP00000293288	9606.ENSP00000216117	0	0	0	0	0.063	0	0	0.503	0.514
BAX	MDM2	9606.ENSP00000293288	9606.ENSP00000258149	0	0	0	0	0	0.056	0	0.455	0.463
BAX	IL1B	9606.ENSP00000293288	9606.ENSP00000263341	0	0	0	0	0.049	0	0	0.465	0.469
BAX	CDK2	9606.ENSP00000293288	9606.ENSP00000266970	0	0	0	0	0	0.056	0	0.391	0.400
BAX	TP53	9606.ENSP00000293288	9606.ENSP00000269305	0	0	0	0	0.051	0.738	0.900	0.681	0.991
BAX	PARP1	9606.ENSP00000293288	9606.ENSP00000355759	0	0	0	0	0	0	0	0.413	0.412
BAX	MYC	9606.ENSP00000293288	9606.ENSP00000479618	0	0	0	0	0	0.057	0	0.409	0.418
BAX	PTGS2	9606.ENSP00000293288	9606.ENSP00000356438	0	0	0	0	0	0	0	0.458	0.457
BAX	IL6	9606.ENSP00000293288	9606.ENSP00000385675	0	0	0	0	0	0	0	0.459	0.459
BAX	NFE2L2	9606.ENSP00000293288	9606.ENSP00000380252	0	0	0	0	0	0	0	0.469	0.469
BAX	CDKN1A	9606.ENSP00000293288	9606.ENSP00000384849	0	0	0	0	0.069	0	0	0.501	0.515
BAX	CASP7	9606.ENSP00000293288	9606.ENSP00000358327	0	0	0	0	0	0.374	0	0.484	0.663
BAX	CASP3	9606.ENSP00000293288	9606.ENSP00000311032	0	0	0	0	0	0.374	0	0.845	0.899
BAX	MAPK8	9606.ENSP00000293288	9606.ENSP00000378974	0	0	0	0	0	0.281	0.900	0.394	0.952
BAX	CYCS	9606.ENSP00000293288	9606.ENSP00000307786	0	0	0	0	0.042	0.281	0.900	0.767	0.981
BAX	BCL2	9606.ENSP00000293288	9606.ENSP00000381185	0	0	0	0.645	0	0.981	0.900	0.758	0.998
BCL2	MAPK1	9606.ENSP00000381185	9606.ENSP00000215832	0	0	0	0	0	0.462	0.900	0.222	0.954
BCL2	CDK2	9606.ENSP00000381185	9606.ENSP00000266970	0	0	0	0	0	0.329	0	0.263	0.484
BCL2	TP53	9606.ENSP00000381185	9606.ENSP00000269305	0	0	0	0	0.051	0.884	0.900	0.628	0.995
BCL2	SOD1	9606.ENSP00000381185	9606.ENSP00000270142	0	0	0	0	0	0.297	0.800	0.150	0.870
BCL2	CYCS	9606.ENSP00000381185	9606.ENSP00000307786	0	0	0	0	0	0.225	0.900	0.619	0.967
BCL2	CASP3	9606.ENSP00000381185	9606.ENSP00000311032	0	0	0	0	0	0.539	0	0.622	0.818
BCL2	PARP1	9606.ENSP00000381185	9606.ENSP00000355759	0	0	0	0	0	0.270	0	0.268	0.443
BCL2	PPP3CA	9606.ENSP00000381185	9606.ENSP00000378323	0	0	0	0	0	0.687	0	0.073	0.698
BCL2	MAPK8	9606.ENSP00000381185	9606.ENSP00000378974	0	0	0	0	0	0.471	0.900	0.258	0.957
BCL2	MYC	9606.ENSP00000381185	9606.ENSP00000479618	0	0	0	0	0	0.327	0	0.407	0.584
BCL2	CREB1	9606.ENSP00000381185	9606.ENSP00000387699	0	0	0	0	0	0	0.900	0.167	0.913
BCL2	ESR1	9606.ENSP00000381185	9606.ENSP00000405330	0	0	0	0	0.069	0.057	0.900	0.244	0.924
CALM1	MAPK1	9606.ENSP00000349467	9606.ENSP00000215832	0	0	0	0	0	0.152	0	0.455	0.518
CALM1	MAPK14	9606.ENSP00000349467	9606.ENSP00000229795	0	0	0	0	0	0.354	0	0.259	0.501
CALM1	F2	9606.ENSP00000349467	9606.ENSP00000308541	0	0	0	0	0	0	0	0.401	0.401
CALM1	NOS2	9606.ENSP00000349467	9606.ENSP00000327251	0	0	0	0	0	0.966	0	0.462	0.981
CALM1	ESR2	9606.ENSP00000349467	9606.ENSP00000343925	0	0	0	0	0	0.470	0	0.186	0.551
CALM1	CREB1	9606.ENSP00000349467	9606.ENSP00000387699	0	0	0	0	0	0	0	0.402	0.402
CALM1	MYC	9606.ENSP00000349467	9606.ENSP00000479618	0	0	0	0	0.051	0.324	0	0.344	0.543
CALM1	ESR1	9606.ENSP00000349467	9606.ENSP00000405330	0	0	0	0	0	0.849	0	0.523	0.925
CALM1	PPP3CA	9606.ENSP00000349467	9606.ENSP00000378323	0	0	0	0	0.117	0.866	0	0.755	0.968
CASP3	MAPK1	9606.ENSP00000311032	9606.ENSP00000215832	0	0	0	0	0.048	0.057	0.800	0.578	0.914
CASP3	HMOX1	9606.ENSP00000311032	9606.ENSP00000216117	0	0	0	0	0	0	0	0.762	0.762
CASP3	MMP2	9606.ENSP00000311032	9606.ENSP00000219070	0	0	0	0	0	0	0	0.681	0.681
CASP3	SERPINE1	9606.ENSP00000311032	9606.ENSP00000223095	0	0	0	0	0	0	0	0.470	0.470
CASP3	MPO	9606.ENSP00000311032	9606.ENSP00000225275	0	0	0	0	0	0	0	0.660	0.660
CASP3	CCL2	9606.ENSP00000311032	9606.ENSP00000225831	0	0	0	0	0.049	0	0	0.636	0.639
CASP3	IL2	9606.ENSP00000311032	9606.ENSP00000226730	0	0	0	0	0	0	0	0.736	0.736
CASP3	IFNG	9606.ENSP00000311032	9606.ENSP00000229135	0	0	0	0	0	0	0	0.608	0.608
CASP3	MAPK14	9606.ENSP00000311032	9606.ENSP00000229795	0	0	0	0	0.061	0.282	0.900	0.709	0.977
CASP3	MDM2	9606.ENSP00000311032	9606.ENSP00000258149	0	0	0	0	0.063	0.875	0	0.730	0.965
CASP3	IL1A	9606.ENSP00000311032	9606.ENSP00000263339	0	0	0	0	0	0	0	0.528	0.528
CASP3	IL1B	9606.ENSP00000311032	9606.ENSP00000263341	0	0	0	0	0	0.056	0	0.825	0.827
CASP3	ICAM1	9606.ENSP00000311032	9606.ENSP00000264832	0	0	0	0	0	0	0	0.643	0.643
CASP3	CDK2	9606.ENSP00000311032	9606.ENSP00000266970	0	0	0	0	0.062	0.064	0	0.754	0.765
CASP3	ERBB3	9606.ENSP00000311032	9606.ENSP00000267101	0	0	0	0	0	0.060	0	0.466	0.477
CASP3	RB1	9606.ENSP00000311032	9606.ENSP00000267163	0	0	0	0	0	0.488	0.900	0.519	0.973
CASP3	TP53	9606.ENSP00000311032	9606.ENSP00000269305	0	0	0	0	0.062	0.270	0	0.900	0.925
CASP3	SOD1	9606.ENSP00000311032	9606.ENSP00000270142	0	0	0	0	0	0.102	0	0.604	0.629
CASP3	VCAM1	9606.ENSP00000311032	9606.ENSP00000294728	0	0	0	0	0.053	0	0	0.549	0.554
CASP3	CXCL10	9606.ENSP00000311032	9606.ENSP00000305651	0	0	0	0	0	0	0	0.469	0.469
CASP3	CXCL8	9606.ENSP00000311032	9606.ENSP00000306512	0	0	0	0	0	0	0	0.668	0.668
CASP3	CYCS	9606.ENSP00000311032	9606.ENSP00000307786	0	0	0	0	0.063	0	0.900	0.952	0.995
CASP3	CD40LG	9606.ENSP00000311032	9606.ENSP00000359663	0	0	0	0	0	0.056	0	0.394	0.403
CASP3	IGFBP3	9606.ENSP00000311032	9606.ENSP00000370473	0	0	0	0	0	0	0	0.406	0.406
CASP3	IGF2	9606.ENSP00000311032	9606.ENSP00000391826	0	0	0	0	0	0	0	0.413	0.412
CASP3	DPP4	9606.ENSP00000311032	9606.ENSP00000353731	0	0	0	0	0.052	0	0	0.406	0.413
CASP3	MAOB	9606.ENSP00000311032	9606.ENSP00000367309	0	0	0	0	0	0	0	0.415	0.415
CASP3	SELE	9606.ENSP00000311032	9606.ENSP00000331736	0	0	0	0	0	0	0	0.422	0.422
CASP3	MMP1	9606.ENSP00000311032	9606.ENSP00000322788	0	0	0	0	0	0	0	0.472	0.472
CASP3	NOS2	9606.ENSP00000311032	9606.ENSP00000327251	0	0	0	0	0	0	0	0.529	0.529
CASP3	ESR2	9606.ENSP00000311032	9606.ENSP00000343925	0	0	0	0	0	0.060	0	0.533	0.542
CASP3	RELA	9606.ENSP00000311032	9606.ENSP00000384273	0	0	0	0	0	0	0	0.567	0.567
CASP3	SPP1	9606.ENSP00000311032	9606.ENSP00000378517	0	0	0	0	0	0.270	0	0.459	0.588
CASP3	NQO1	9606.ENSP00000311032	9606.ENSP00000319788	0	0	0	0	0	0	0	0.596	0.596
CASP3	CHEK2	9606.ENSP00000311032	9606.ENSP00000372023	0	0	0	0	0.062	0	0	0.629	0.637
CASP3	CREB1	9606.ENSP00000311032	9606.ENSP00000387699	0	0	0	0	0	0	0	0.656	0.656
CASP3	ESR1	9606.ENSP00000311032	9606.ENSP00000405330	0	0	0	0	0	0.060	0	0.674	0.680
CASP3	NFE2L2	9606.ENSP00000311032	9606.ENSP00000380252	0	0	0	0	0	0.213	0	0.650	0.712
CASP3	PTGS2	9606.ENSP00000311032	9606.ENSP00000356438	0	0	0	0	0	0	0	0.721	0.721
CASP3	MAPK8	9606.ENSP00000311032	9606.ENSP00000378974	0	0	0	0	0.054	0.270	0	0.714	0.785
CASP3	MYC	9606.ENSP00000311032	9606.ENSP00000479618	0	0	0	0	0	0	0	0.793	0.793
CASP3	IL6	9606.ENSP00000311032	9606.ENSP00000385675	0	0	0	0	0	0	0	0.836	0.836
CASP3	CASP7	9606.ENSP00000311032	9606.ENSP00000358327	0	0	0	0.942	0.062	0.271	0.900	0.912	0.929
CASP3	CDKN1A	9606.ENSP00000311032	9606.ENSP00000384849	0	0	0	0	0	0.770	0.800	0.883	0.994
CASP3	PARP1	9606.ENSP00000311032	9606.ENSP00000355759	0	0	0	0	0.062	0.880	0.900	0.851	0.998
CASP7	MDM2	9606.ENSP00000358327	9606.ENSP00000258149	0	0	0	0	0.062	0	0	0.423	0.435
CASP7	IL1B	9606.ENSP00000358327	9606.ENSP00000263341	0	0	0	0	0.062	0.056	0	0.464	0.484
CASP7	CDK2	9606.ENSP00000358327	9606.ENSP00000266970	0	0	0	0	0.062	0	0	0.523	0.533
CASP7	RB1	9606.ENSP00000358327	9606.ENSP00000267163	0	0	0	0	0	0.675	0	0.276	0.754
CASP7	TP53	9606.ENSP00000358327	9606.ENSP00000269305	0	0	0	0	0.062	0	0	0.674	0.681
CASP7	CYCS	9606.ENSP00000358327	9606.ENSP00000307786	0	0	0	0	0.063	0	0.900	0.842	0.983
CASP7	PARP1	9606.ENSP00000358327	9606.ENSP00000355759	0	0	0	0	0.052	0.719	0.900	0.715	0.991
CASP7	NFE2L2	9606.ENSP00000358327	9606.ENSP00000380252	0	0	0	0	0	0.270	0	0.230	0.413
CASP7	ESR1	9606.ENSP00000358327	9606.ENSP00000405330	0	0	0	0	0	0.060	0	0.408	0.419
CASP7	CDKN1A	9606.ENSP00000358327	9606.ENSP00000384849	0	0	0	0	0.067	0	0	0.415	0.431
CASP7	CHEK2	9606.ENSP00000358327	9606.ENSP00000372023	0	0	0	0	0.062	0	0	0.419	0.431
CASP7	MYC	9606.ENSP00000358327	9606.ENSP00000479618	0	0	0	0	0	0	0	0.468	0.468
CASP7	MAPK8	9606.ENSP00000358327	9606.ENSP00000378974	0	0	0	0	0	0	0	0.496	0.496
CCL2	HMOX1	9606.ENSP00000225831	9606.ENSP00000216117	0	0	0	0	0.095	0	0	0.668	0.686
CCL2	MMP2	9606.ENSP00000225831	9606.ENSP00000219070	0	0	0	0	0.155	0	0	0.667	0.706
CCL2	PON1	9606.ENSP00000225831	9606.ENSP00000222381	0	0	0	0	0	0	0	0.452	0.452
CCL2	SERPINE1	9606.ENSP00000225831	9606.ENSP00000223095	0	0	0	0	0.122	0	0	0.740	0.762
CCL2	MPO	9606.ENSP00000225831	9606.ENSP00000225275	0	0	0	0	0	0	0	0.682	0.682
CCL2	IGFBP3	9606.ENSP00000225831	9606.ENSP00000370473	0	0	0	0	0.077	0	0	0.391	0.413
CCL2	CD14	9606.ENSP00000225831	9606.ENSP00000304236	0	0	0	0	0.117	0	0	0.365	0.416
CCL2	F2	9606.ENSP00000225831	9606.ENSP00000308541	0	0	0	0	0	0	0	0.416	0.416
CCL2	SOD1	9606.ENSP00000225831	9606.ENSP00000270142	0	0	0	0	0	0	0	0.427	0.426
CCL2	CYCS	9606.ENSP00000225831	9606.ENSP00000307786	0	0	0	0	0	0	0	0.454	0.454
CCL2	IL4R	9606.ENSP00000225831	9606.ENSP00000379111	0	0	0	0	0.109	0	0	0.415	0.456
CCL2	NFE2L2	9606.ENSP00000225831	9606.ENSP00000380252	0	0	0	0	0	0	0	0.459	0.459
CCL2	MAPK14	9606.ENSP00000225831	9606.ENSP00000229795	0	0	0	0	0	0	0	0.465	0.465
CCL2	ESR1	9606.ENSP00000225831	9606.ENSP00000405330	0	0	0	0	0.055	0	0	0.460	0.467
CCL2	CREB1	9606.ENSP00000225831	9606.ENSP00000387699	0	0	0	0	0	0	0	0.469	0.469
CCL2	MYC	9606.ENSP00000225831	9606.ENSP00000479618	0	0	0	0	0.062	0	0	0.469	0.480
CCL2	DPP4	9606.ENSP00000225831	9606.ENSP00000353731	0	0	0	0	0	0	0	0.495	0.495
CCL2	MAPK8	9606.ENSP00000225831	9606.ENSP00000378974	0	0	0	0	0	0	0	0.518	0.518
CCL2	NOS2	9606.ENSP00000225831	9606.ENSP00000327251	0	0	0	0	0	0	0	0.624	0.624
CCL2	TP53	9606.ENSP00000225831	9606.ENSP00000269305	0	0	0	0	0	0	0	0.644	0.644
CCL2	CD40LG	9606.ENSP00000225831	9606.ENSP00000359663	0	0	0	0	0	0.057	0	0.681	0.686
CCL2	SPP1	9606.ENSP00000225831	9606.ENSP00000378517	0	0	0	0	0.119	0	0	0.663	0.690
CCL2	MMP1	9606.ENSP00000225831	9606.ENSP00000322788	0	0	0	0	0.109	0.213	0	0.614	0.705
CCL2	PTGS2	9606.ENSP00000225831	9606.ENSP00000356438	0	0	0	0	0.117	0	0	0.754	0.774
CCL2	SELE	9606.ENSP00000225831	9606.ENSP00000331736	0	0	0	0	0.109	0	0	0.767	0.784
CCL2	IL2	9606.ENSP00000225831	9606.ENSP00000226730	0	0	0	0	0	0	0	0.810	0.810
CCL2	IFNG	9606.ENSP00000225831	9606.ENSP00000229135	0	0	0	0	0.063	0	0	0.835	0.839
CCL2	ICAM1	9606.ENSP00000225831	9606.ENSP00000264832	0	0	0	0	0.148	0	0	0.859	0.874
CCL2	VCAM1	9606.ENSP00000225831	9606.ENSP00000294728	0	0	0	0	0.202	0	0	0.879	0.899
CCL2	RELA	9606.ENSP00000225831	9606.ENSP00000384273	0	0	0	0	0	0.486	0.800	0.561	0.950
CCL2	IL1A	9606.ENSP00000225831	9606.ENSP00000263339	0	0	0	0	0.092	0	0.900	0.837	0.983
CCL2	CXCL10	9606.ENSP00000225831	9606.ENSP00000305651	0	0	0	0	0.160	0	0.900	0.910	0.991
CCL2	IL1B	9606.ENSP00000225831	9606.ENSP00000263341	0	0	0	0	0.127	0	0.900	0.927	0.993
CCL2	IL6	9606.ENSP00000225831	9606.ENSP00000385675	0	0	0	0	0.267	0	0.900	0.930	0.994
CCL2	CXCL8	9606.ENSP00000225831	9606.ENSP00000306512	0	0	0	0	0.271	0.280	0.900	0.923	0.995
CD14	IFNG	9606.ENSP00000304236	9606.ENSP00000229135	0	0	0	0	0	0	0	0.626	0.626
CD14	IL1B	9606.ENSP00000304236	9606.ENSP00000263341	0	0	0	0	0.255	0	0	0.570	0.666
CD14	CXCL10	9606.ENSP00000304236	9606.ENSP00000305651	0	0	0	0	0.160	0	0	0.335	0.418
CD14	CXCL8	9606.ENSP00000304236	9606.ENSP00000306512	0	0	0	0	0.109	0	0	0.415	0.457
CD14	IL6	9606.ENSP00000304236	9606.ENSP00000385675	0	0	0	0	0.076	0	0	0.598	0.613
CD40LG	SERPINE1	9606.ENSP00000359663	9606.ENSP00000223095	0	0	0	0	0	0.056	0	0.468	0.476
CD40LG	MPO	9606.ENSP00000359663	9606.ENSP00000225275	0	0	0	0	0	0.056	0	0.506	0.513
CD40LG	IL2	9606.ENSP00000359663	9606.ENSP00000226730	0	0	0	0	0.076	0	0	0.806	0.813
CD40LG	IFNG	9606.ENSP00000359663	9606.ENSP00000229135	0	0	0	0	0.117	0	0	0.863	0.874
CD40LG	MAPK14	9606.ENSP00000359663	9606.ENSP00000229795	0	0	0	0	0	0	0.900	0.282	0.925
CD40LG	IL1A	9606.ENSP00000359663	9606.ENSP00000263339	0	0	0	0	0	0	0	0.649	0.649
CD40LG	IL1B	9606.ENSP00000359663	9606.ENSP00000263341	0	0	0	0	0	0	0	0.692	0.692
CD40LG	ICAM1	9606.ENSP00000359663	9606.ENSP00000264832	0	0	0	0	0	0	0	0.709	0.709
CD40LG	TP53	9606.ENSP00000359663	9606.ENSP00000269305	0	0	0	0	0	0.213	0	0.662	0.722
CD40LG	VCAM1	9606.ENSP00000359663	9606.ENSP00000294728	0	0	0	0	0.085	0	0	0.612	0.629
CD40LG	CXCL10	9606.ENSP00000359663	9606.ENSP00000305651	0	0	0	0	0	0	0	0.605	0.605
CD40LG	CXCL8	9606.ENSP00000359663	9606.ENSP00000306512	0	0	0	0	0.062	0	0	0.681	0.688
CD40LG	F2	9606.ENSP00000359663	9606.ENSP00000308541	0	0	0	0	0	0.097	0	0.411	0.446
CD40LG	SELE	9606.ENSP00000359663	9606.ENSP00000331736	0	0	0	0	0.056	0	0	0.560	0.566
CD40LG	PTGS2	9606.ENSP00000359663	9606.ENSP00000356438	0	0	0	0	0	0.056	0	0.391	0.400
CD40LG	IL4R	9606.ENSP00000359663	9606.ENSP00000379111	0	0	0	0	0	0	0	0.424	0.424
CD40LG	IL6	9606.ENSP00000359663	9606.ENSP00000385675	0	0	0	0	0	0	0	0.761	0.761
CD40LG	MAPK8	9606.ENSP00000359663	9606.ENSP00000378974	0	0	0	0	0	0.058	0.900	0.245	0.922
CD40LG	RELA	9606.ENSP00000359663	9606.ENSP00000384273	0	0	0	0	0	0	0.900	0.547	0.952
CDK2	MAPK1	9606.ENSP00000266970	9606.ENSP00000215832	0	0	0.399	0.863	0.049	0.235	0.900	0.615	0.931
CDK2	MMP2	9606.ENSP00000266970	9606.ENSP00000219070	0	0	0	0	0	0	0	0.469	0.469
CDK2	MDM2	9606.ENSP00000266970	9606.ENSP00000258149	0	0	0	0	0.051	0	0.900	0.727	0.971
CDK2	PTGS2	9606.ENSP00000266970	9606.ENSP00000356438	0	0	0	0	0	0	0	0.403	0.403
CDK2	CREB1	9606.ENSP00000266970	9606.ENSP00000387699	0	0	0	0	0.061	0	0	0.410	0.423
CDK2	IL6	9606.ENSP00000266970	9606.ENSP00000385675	0	0	0	0	0	0	0	0.465	0.465
CDK2	PARP1	9606.ENSP00000266970	9606.ENSP00000355759	0	0	0	0	0.094	0.064	0	0.480	0.520
CDK2	CHEK2	9606.ENSP00000266970	9606.ENSP00000372023	0	0	0.304	0.682	0.165	0.246	0	0.763	0.544
CDK2	ESR1	9606.ENSP00000266970	9606.ENSP00000405330	0	0	0	0	0	0.282	0	0.620	0.715
CDK2	CYCS	9606.ENSP00000266970	9606.ENSP00000307786	0	0	0	0	0.062	0.064	0	0.723	0.736
CDK2	MYC	9606.ENSP00000266970	9606.ENSP00000479618	0	0	0	0	0.118	0.310	0.650	0.787	0.948
CDK2	RB1	9606.ENSP00000266970	9606.ENSP00000267163	0	0	0	0	0.082	0.929	0.900	0.710	0.997
CDK2	PCNA	9606.ENSP00000266970	9606.ENSP00000368458	0	0	0	0	0.684	0.992	0.900	0.484	0.999
CDK2	CDKN1A	9606.ENSP00000266970	9606.ENSP00000384849	0	0	0	0	0.052	0.998	0.900	0.994	0.999
CDK2	TP53	9606.ENSP00000266970	9606.ENSP00000269305	0	0	0	0	0.095	0.790	0.900	0.970	0.999
CDKN1A	HMOX1	9606.ENSP00000384849	9606.ENSP00000216117	0	0	0	0	0.076	0	0	0.419	0.440
CDKN1A	MMP2	9606.ENSP00000384849	9606.ENSP00000219070	0	0	0	0	0.061	0	0	0.422	0.434
CDKN1A	SERPINE1	9606.ENSP00000384849	9606.ENSP00000223095	0	0	0	0	0.103	0	0	0.456	0.491
CDKN1A	MAPK14	9606.ENSP00000384849	9606.ENSP00000229795	0	0	0	0	0	0.282	0	0.455	0.592
CDKN1A	MDM2	9606.ENSP00000384849	9606.ENSP00000258149	0	0	0	0	0.062	0.872	0	0.823	0.976
CDKN1A	IL1B	9606.ENSP00000384849	9606.ENSP00000263341	0	0	0	0	0.069	0	0	0.390	0.407
CDKN1A	RB1	9606.ENSP00000384849	9606.ENSP00000267163	0	0	0	0	0.056	0.370	0.900	0.741	0.982
CDKN1A	TP53	9606.ENSP00000384849	9606.ENSP00000269305	0	0	0	0	0	0.968	0.900	0.903	0.999
CDKN1A	CXCL8	9606.ENSP00000384849	9606.ENSP00000306512	0	0	0	0	0.106	0	0	0.426	0.465
CDKN1A	CYCS	9606.ENSP00000384849	9606.ENSP00000307786	0	0	0	0	0	0	0	0.600	0.600
CDKN1A	NOS2	9606.ENSP00000384849	9606.ENSP00000327251	0	0	0	0	0	0.105	0.900	0.150	0.917
CDKN1A	PARP1	9606.ENSP00000384849	9606.ENSP00000355759	0	0	0	0	0.049	0.675	0	0.489	0.828
CDKN1A	PTGS2	9606.ENSP00000384849	9606.ENSP00000356438	0	0	0	0	0.096	0	0	0.455	0.486
CDKN1A	PCNA	9606.ENSP00000384849	9606.ENSP00000368458	0	0	0	0	0.063	0.998	0.900	0.265	0.999
CDKN1A	IGFBP3	9606.ENSP00000384849	9606.ENSP00000370473	0	0	0	0	0.070	0	0	0.459	0.475
CDKN1A	CHEK2	9606.ENSP00000384849	9606.ENSP00000372023	0	0	0	0	0.088	0.270	0	0.675	0.765
CDKN1A	MAPK8	9606.ENSP00000384849	9606.ENSP00000378974	0	0	0	0	0	0.487	0.900	0.464	0.970
CDKN1A	NFE2L2	9606.ENSP00000384849	9606.ENSP00000380252	0	0	0	0	0.060	0.285	0	0.740	0.810
CDKN1A	RELA	9606.ENSP00000384849	9606.ENSP00000384273	0	0	0	0	0.076	0.486	0	0.391	0.685
CDKN1A	IL6	9606.ENSP00000384849	9606.ENSP00000385675	0	0	0	0	0.076	0	0	0.506	0.524
CDKN1A	ESR1	9606.ENSP00000384849	9606.ENSP00000405330	0	0	0	0	0	0.675	0	0.597	0.863
CDKN1A	CREB1	9606.ENSP00000384849	9606.ENSP00000387699	0	0	0	0	0	0	0.900	0.414	0.938
CDKN1A	MYC	9606.ENSP00000384849	9606.ENSP00000479618	0	0	0	0	0	0.307	0.900	0.748	0.981
CHEK2	MAPK1	9606.ENSP00000372023	9606.ENSP00000215832	0	0	0.220	0.681	0.063	0.686	0	0.356	0.742
CHEK2	MDM2	9606.ENSP00000372023	9606.ENSP00000258149	0	0	0	0	0	0.675	0.900	0.915	0.997
CHEK2	RB1	9606.ENSP00000372023	9606.ENSP00000267163	0	0	0	0	0.086	0.270	0	0.394	0.560
CHEK2	TP53	9606.ENSP00000372023	9606.ENSP00000269305	0	0	0	0	0.096	0.870	0.900	0.884	0.998
CHEK2	CYCS	9606.ENSP00000372023	9606.ENSP00000307786	0	0	0	0	0	0	0	0.465	0.465
CHEK2	PARP1	9606.ENSP00000372023	9606.ENSP00000355759	0	0	0	0	0.066	0	0	0.718	0.725
CHEK2	PCNA	9606.ENSP00000372023	9606.ENSP00000368458	0	0	0	0	0.132	0.349	0	0.456	0.666
CHEK2	PPP3CA	9606.ENSP00000372023	9606.ENSP00000378323	0	0	0	0	0.296	0.213	0	0.101	0.458
CHEK2	ESR1	9606.ENSP00000372023	9606.ENSP00000405330	0	0	0	0	0	0	0	0.504	0.504
CHEK2	MYC	9606.ENSP00000372023	9606.ENSP00000479618	0	0	0	0	0.052	0	0	0.619	0.624
CREB1	MAPK1	9606.ENSP00000387699	9606.ENSP00000215832	0	0	0	0	0	0	0.900	0.733	0.972
CREB1	HMOX1	9606.ENSP00000387699	9606.ENSP00000216117	0	0	0	0	0	0	0.900	0.510	0.948
CREB1	IL2	9606.ENSP00000387699	9606.ENSP00000226730	0	0	0	0	0	0	0	0.504	0.504
CREB1	IFNG	9606.ENSP00000387699	9606.ENSP00000229135	0	0	0	0	0	0	0	0.412	0.412
CREB1	MAPK14	9606.ENSP00000387699	9606.ENSP00000229795	0	0	0	0	0	0.462	0.900	0.642	0.979
CREB1	MDM2	9606.ENSP00000387699	9606.ENSP00000258149	0	0	0	0	0.062	0	0	0.413	0.425
CREB1	TYR	9606.ENSP00000387699	9606.ENSP00000263321	0	0	0	0	0	0	0	0.523	0.523
CREB1	IL1B	9606.ENSP00000387699	9606.ENSP00000263341	0	0	0	0	0	0	0	0.650	0.650
CREB1	ICAM1	9606.ENSP00000387699	9606.ENSP00000264832	0	0	0	0	0	0	0	0.400	0.400
CREB1	TP53	9606.ENSP00000387699	9606.ENSP00000269305	0	0	0	0	0	0.805	0	0.972	0.994
CREB1	SOD1	9606.ENSP00000387699	9606.ENSP00000270142	0	0	0	0	0	0	0	0.477	0.477
CREB1	CXCL8	9606.ENSP00000387699	9606.ENSP00000306512	0	0	0	0	0	0	0	0.508	0.508
CREB1	CYCS	9606.ENSP00000387699	9606.ENSP00000307786	0	0	0	0	0	0	0	0.529	0.529
CREB1	ESR2	9606.ENSP00000387699	9606.ENSP00000343925	0	0	0	0	0	0.078	0	0.623	0.637
CREB1	PTGS2	9606.ENSP00000387699	9606.ENSP00000356438	0	0	0	0	0.051	0	0	0.609	0.613
CREB1	PPP3CA	9606.ENSP00000387699	9606.ENSP00000378323	0	0	0	0	0	0	0	0.425	0.425
CREB1	MAPK8	9606.ENSP00000387699	9606.ENSP00000378974	0	0	0	0	0.075	0	0	0.563	0.579
CREB1	NFE2L2	9606.ENSP00000387699	9606.ENSP00000380252	0	0	0	0	0	0	0.900	0.618	0.960
CREB1	RELA	9606.ENSP00000387699	9606.ENSP00000384273	0	0	0	0	0.094	0	0	0.568	0.592
CREB1	IL6	9606.ENSP00000387699	9606.ENSP00000385675	0	0	0	0	0	0	0.900	0.670	0.965
CREB1	MYC	9606.ENSP00000387699	9606.ENSP00000479618	0	0	0	0	0	0	0	0.653	0.653
CREB1	ESR1	9606.ENSP00000387699	9606.ENSP00000405330	0	0	0	0	0	0.078	0	0.852	0.858
CXCL10	HMOX1	9606.ENSP00000305651	9606.ENSP00000216117	0	0	0	0	0.065	0	0	0.474	0.487
CXCL10	MMP2	9606.ENSP00000305651	9606.ENSP00000219070	0	0	0	0	0	0	0	0.424	0.424
CXCL10	SERPINE1	9606.ENSP00000305651	9606.ENSP00000223095	0	0	0	0	0.064	0	0	0.460	0.472
CXCL10	MPO	9606.ENSP00000305651	9606.ENSP00000225275	0	0	0	0	0	0	0	0.467	0.467
CXCL10	IL2	9606.ENSP00000305651	9606.ENSP00000226730	0	0	0	0	0	0	0	0.805	0.805
CXCL10	IFNG	9606.ENSP00000305651	9606.ENSP00000229135	0	0	0	0	0.118	0	0	0.861	0.872
CXCL10	IL1A	9606.ENSP00000305651	9606.ENSP00000263339	0	0	0	0	0.121	0	0.900	0.802	0.981
CXCL10	IL1B	9606.ENSP00000305651	9606.ENSP00000263341	0	0	0	0	0.242	0	0.900	0.863	0.988
CXCL10	ICAM1	9606.ENSP00000305651	9606.ENSP00000264832	0	0	0	0	0.145	0	0	0.708	0.739
CXCL10	TP53	9606.ENSP00000305651	9606.ENSP00000269305	0	0	0	0	0.062	0	0	0.395	0.408
CXCL10	IL10RB	9606.ENSP00000305651	9606.ENSP00000290200	0	0	0	0	0.062	0	0	0.395	0.408
CXCL10	VCAM1	9606.ENSP00000305651	9606.ENSP00000294728	0	0	0	0	0.098	0	0	0.723	0.740
CXCL10	SPP1	9606.ENSP00000305651	9606.ENSP00000378517	0	0	0	0	0.062	0	0	0.458	0.469
CXCL10	MMP1	9606.ENSP00000305651	9606.ENSP00000322788	0	0	0	0	0.065	0	0	0.456	0.469
CXCL10	RELA	9606.ENSP00000305651	9606.ENSP00000384273	0	0	0	0	0.062	0	0	0.462	0.474
CXCL10	NOS2	9606.ENSP00000305651	9606.ENSP00000327251	0	0	0	0	0.064	0	0	0.526	0.537
CXCL10	SELE	9606.ENSP00000305651	9606.ENSP00000331736	0	0	0	0	0.076	0	0	0.550	0.566
CXCL10	PTGS2	9606.ENSP00000305651	9606.ENSP00000356438	0	0	0	0	0.107	0	0	0.560	0.590
CXCL10	DPP4	9606.ENSP00000305651	9606.ENSP00000353731	0	0	0	0	0	0.679	0	0.528	0.842
CXCL10	CXCL8	9606.ENSP00000305651	9606.ENSP00000306512	0	0	0	0	0.145	0	0.600	0.879	0.955
CXCL10	IL6	9606.ENSP00000305651	9606.ENSP00000385675	0	0	0	0	0.175	0	0.900	0.878	0.989
CXCL8	HMOX1	9606.ENSP00000306512	9606.ENSP00000216117	0	0	0	0	0.077	0	0	0.660	0.673
CXCL8	MMP2	9606.ENSP00000306512	9606.ENSP00000219070	0	0	0	0	0	0	0	0.688	0.688
CXCL8	SERPINE1	9606.ENSP00000306512	9606.ENSP00000223095	0	0	0	0	0.137	0	0	0.703	0.732
CXCL8	MPO	9606.ENSP00000306512	9606.ENSP00000225275	0	0	0	0	0.065	0	0	0.766	0.771
CXCL8	IL2	9606.ENSP00000306512	9606.ENSP00000226730	0	0	0	0	0	0	0	0.873	0.873
CXCL8	IFNG	9606.ENSP00000306512	9606.ENSP00000229135	0	0	0	0	0.062	0	0	0.859	0.862
CXCL8	MAPK14	9606.ENSP00000306512	9606.ENSP00000229795	0	0	0	0	0	0	0.900	0.556	0.953
CXCL8	IL1A	9606.ENSP00000306512	9606.ENSP00000263339	0	0	0	0	0.234	0	0.900	0.872	0.989
CXCL8	IL1B	9606.ENSP00000306512	9606.ENSP00000263341	0	0	0	0	0.679	0	0.900	0.948	0.998
CXCL8	ICAM1	9606.ENSP00000306512	9606.ENSP00000264832	0	0	0	0	0.214	0	0	0.858	0.883
CXCL8	TP53	9606.ENSP00000306512	9606.ENSP00000269305	0	0	0	0	0	0.128	0	0.663	0.693
CXCL8	IL10RB	9606.ENSP00000306512	9606.ENSP00000290200	0	0	0	0	0.062	0	0	0.407	0.419
CXCL8	VCAM1	9606.ENSP00000306512	9606.ENSP00000294728	0	0	0	0	0.062	0	0	0.817	0.821
CXCL8	CYP1A1	9606.ENSP00000306512	9606.ENSP00000369050	0	0	0	0	0	0	0	0.413	0.412
CXCL8	IGFBP3	9606.ENSP00000306512	9606.ENSP00000370473	0	0	0	0	0	0	0	0.459	0.459
CXCL8	NFE2L2	9606.ENSP00000306512	9606.ENSP00000380252	0	0	0	0	0	0	0	0.460	0.459
CXCL8	IL4R	9606.ENSP00000306512	9606.ENSP00000379111	0	0	0	0	0.088	0	0	0.455	0.481
CXCL8	CYCS	9606.ENSP00000306512	9606.ENSP00000307786	0	0	0	0	0	0	0	0.501	0.501
CXCL8	ESR1	9606.ENSP00000306512	9606.ENSP00000405330	0	0	0	0	0	0	0	0.518	0.518
CXCL8	F2	9606.ENSP00000306512	9606.ENSP00000308541	0	0	0	0	0	0	0	0.535	0.535
CXCL8	MAPK8	9606.ENSP00000306512	9606.ENSP00000378974	0	0	0	0	0	0	0	0.557	0.557
CXCL8	MYC	9606.ENSP00000306512	9606.ENSP00000479618	0	0	0	0	0.062	0	0	0.564	0.574
CXCL8	NOS2	9606.ENSP00000306512	9606.ENSP00000327251	0	0	0	0	0.053	0	0	0.583	0.589
CXCL8	SPP1	9606.ENSP00000306512	9606.ENSP00000378517	0	0	0	0	0.082	0	0	0.605	0.622
CXCL8	MMP1	9606.ENSP00000306512	9606.ENSP00000322788	0	0	0	0	0.190	0	0	0.715	0.759
CXCL8	SELE	9606.ENSP00000306512	9606.ENSP00000331736	0	0	0	0	0.049	0	0	0.773	0.775
CXCL8	PTGS2	9606.ENSP00000306512	9606.ENSP00000356438	0	0	0	0	0.753	0	0	0.778	0.943
CXCL8	RELA	9606.ENSP00000306512	9606.ENSP00000384273	0	0	0	0	0.065	0.753	0.900	0.681	0.991
CXCL8	IL6	9606.ENSP00000306512	9606.ENSP00000385675	0	0	0	0	0.581	0	0.900	0.947	0.997
CYCS	MAPK1	9606.ENSP00000307786	9606.ENSP00000215832	0	0	0	0	0.054	0	0.900	0.520	0.950
CYCS	HMOX1	9606.ENSP00000307786	9606.ENSP00000216117	0	0	0	0	0.064	0	0	0.708	0.716
CYCS	MMP2	9606.ENSP00000307786	9606.ENSP00000219070	0	0	0	0	0	0	0	0.504	0.504
CYCS	MPO	9606.ENSP00000307786	9606.ENSP00000225275	0	0	0	0	0	0	0	0.425	0.425
CYCS	IL2	9606.ENSP00000307786	9606.ENSP00000226730	0	0	0	0	0	0	0	0.470	0.470
CYCS	MAPK14	9606.ENSP00000307786	9606.ENSP00000229795	0	0	0	0	0.054	0	0	0.484	0.491
CYCS	MDM2	9606.ENSP00000307786	9606.ENSP00000258149	0	0	0	0	0	0	0	0.600	0.600
CYCS	IL1B	9606.ENSP00000307786	9606.ENSP00000263341	0	0	0	0	0	0	0	0.636	0.636
CYCS	ICAM1	9606.ENSP00000307786	9606.ENSP00000264832	0	0	0	0	0	0	0	0.458	0.457
CYCS	TP53	9606.ENSP00000307786	9606.ENSP00000269305	0	0	0	0	0	0	0	0.859	0.859
CYCS	SOD1	9606.ENSP00000307786	9606.ENSP00000270142	0	0	0	0	0.126	0	0	0.588	0.625
CYCS	CYP1A1	9606.ENSP00000307786	9606.ENSP00000369050	0	0	0	0	0	0.142	0	0.344	0.413
CYCS	NOS2	9606.ENSP00000307786	9606.ENSP00000327251	0	0	0	0	0.064	0	0	0.422	0.436
CYCS	CYP3A4	9606.ENSP00000307786	9606.ENSP00000337915	0	0	0	0	0	0.247	0	0.317	0.464
CYCS	NQO1	9606.ENSP00000307786	9606.ENSP00000319788	0	0	0	0	0	0	0	0.467	0.467
CYCS	ESR2	9606.ENSP00000307786	9606.ENSP00000343925	0	0	0	0	0	0.072	0	0.467	0.484
CYCS	ESR1	9606.ENSP00000307786	9606.ENSP00000405330	0	0	0	0	0	0	0	0.517	0.517
CYCS	NFE2L2	9606.ENSP00000307786	9606.ENSP00000380252	0	0	0	0	0	0	0	0.519	0.519
CYCS	PTGS2	9606.ENSP00000307786	9606.ENSP00000356438	0	0	0	0	0	0	0	0.568	0.568
CYCS	MAPK8	9606.ENSP00000307786	9606.ENSP00000378974	0	0	0	0	0.042	0	0	0.605	0.605
CYCS	IL6	9606.ENSP00000307786	9606.ENSP00000385675	0	0	0	0	0	0	0	0.610	0.610
CYCS	MYC	9606.ENSP00000307786	9606.ENSP00000479618	0	0	0	0	0	0	0	0.615	0.615
CYCS	PARP1	9606.ENSP00000307786	9606.ENSP00000355759	0	0	0	0	0.062	0	0	0.730	0.735
CYCS	PPP3CA	9606.ENSP00000307786	9606.ENSP00000378323	0	0	0	0	0.062	0	0.900	0.160	0.914
CYP1A1	HMOX1	9606.ENSP00000369050	9606.ENSP00000216117	0	0	0	0	0.066	0	0	0.567	0.578
CYP1A1	PON1	9606.ENSP00000369050	9606.ENSP00000222381	0	0	0	0	0.054	0	0	0.451	0.458
CYP1A1	IL1A	9606.ENSP00000369050	9606.ENSP00000263339	0	0	0	0	0.083	0	0	0.447	0.471
CYP1A1	IL1B	9606.ENSP00000369050	9606.ENSP00000263341	0	0	0	0	0	0	0	0.458	0.457
CYP1A1	TP53	9606.ENSP00000369050	9606.ENSP00000269305	0	0	0	0	0	0.058	0	0.560	0.568
CYP1A1	GSTM1	9606.ENSP00000369050	9606.ENSP00000311469	0	0	0	0	0.062	0.057	0.650	0.870	0.954
CYP1A1	NQO1	9606.ENSP00000369050	9606.ENSP00000319788	0	0	0	0	0.085	0	0	0.749	0.761
CYP1A1	CYP3A4	9606.ENSP00000369050	9606.ENSP00000337915	0	0	0.443	0.605	0.123	0.104	0.900	0.903	0.954
CYP1A1	ESR2	9606.ENSP00000369050	9606.ENSP00000343925	0	0	0	0	0.065	0.073	0	0.561	0.587
CYP1A1	PTGS2	9606.ENSP00000369050	9606.ENSP00000356438	0	0	0	0	0.053	0	0	0.483	0.489
CYP1A1	IL6	9606.ENSP00000369050	9606.ENSP00000385675	0	0	0	0	0	0	0	0.480	0.480
CYP1A1	NFE2L2	9606.ENSP00000369050	9606.ENSP00000380252	0	0	0	0	0	0	0	0.520	0.520
CYP1A1	ESR1	9606.ENSP00000369050	9606.ENSP00000405330	0	0	0	0	0.062	0.073	0	0.677	0.695
CYP3A4	PON1	9606.ENSP00000337915	9606.ENSP00000222381	0	0	0	0	0.098	0	0	0.451	0.483
CYP3A4	TP53	9606.ENSP00000337915	9606.ENSP00000269305	0	0	0	0	0	0.058	0	0.417	0.427
CYP3A4	F2	9606.ENSP00000337915	9606.ENSP00000308541	0	0	0	0	0.087	0.061	0	0.502	0.535
CYP3A4	GSTM1	9606.ENSP00000337915	9606.ENSP00000311469	0	0	0	0	0	0.056	0.650	0.561	0.842
CYP3A4	NQO1	9606.ENSP00000337915	9606.ENSP00000319788	0	0	0	0	0	0	0	0.454	0.454
CYP3A4	IL6	9606.ENSP00000337915	9606.ENSP00000385675	0	0	0	0	0	0	0	0.457	0.457
CYP3A4	DPP4	9606.ENSP00000337915	9606.ENSP00000353731	0	0	0	0	0	0	0	0.459	0.459
CYP3A4	ESR1	9606.ENSP00000337915	9606.ENSP00000405330	0	0	0	0	0.049	0.073	0	0.621	0.637
CYP3A4	MAOB	9606.ENSP00000337915	9606.ENSP00000367309	0	0	0	0	0.064	0	0.900	0.285	0.927
CYP3A4	MAOA	9606.ENSP00000337915	9606.ENSP00000340684	0	0	0	0	0.064	0	0.900	0.366	0.935
DPP4	MMP2	9606.ENSP00000353731	9606.ENSP00000219070	0	0	0	0	0.063	0	0	0.391	0.404
DPP4	SERPINE1	9606.ENSP00000353731	9606.ENSP00000223095	0	0	0	0	0	0	0	0.479	0.479
DPP4	IL2	9606.ENSP00000353731	9606.ENSP00000226730	0	0	0	0	0	0	0	0.459	0.459
DPP4	IFNG	9606.ENSP00000353731	9606.ENSP00000229135	0	0	0	0	0	0	0	0.403	0.403
DPP4	TYR	9606.ENSP00000353731	9606.ENSP00000263321	0	0	0	0	0	0	0	0.408	0.408
DPP4	IL1B	9606.ENSP00000353731	9606.ENSP00000263341	0	0	0	0	0.062	0	0	0.465	0.476
DPP4	ICAM1	9606.ENSP00000353731	9606.ENSP00000264832	0	0	0	0	0.062	0	0	0.462	0.474
DPP4	TP53	9606.ENSP00000353731	9606.ENSP00000269305	0	0	0	0	0	0	0	0.928	0.928
DPP4	VCAM1	9606.ENSP00000353731	9606.ENSP00000294728	0	0	0	0	0	0	0	0.428	0.428
DPP4	PTPN1	9606.ENSP00000353731	9606.ENSP00000360683	0	0	0	0	0	0	0	0.472	0.472
DPP4	IGF2	9606.ENSP00000353731	9606.ENSP00000391826	0	0	0	0	0	0	0	0.503	0.503
DPP4	IL6	9606.ENSP00000353731	9606.ENSP00000385675	0	0	0	0	0	0	0	0.566	0.566
ERBB3	MAPK1	9606.ENSP00000267101	9606.ENSP00000215832	0	0	0	0.568	0	0.318	0	0.563	0.478
ERBB3	MAPK14	9606.ENSP00000267101	9606.ENSP00000229795	0	0	0	0	0	0.213	0	0.345	0.462
ERBB3	MDM2	9606.ENSP00000267101	9606.ENSP00000258149	0	0	0	0	0	0.270	0	0.427	0.563
ERBB3	ESR2	9606.ENSP00000267101	9606.ENSP00000343925	0	0	0	0	0	0.102	0	0.575	0.602
ERBB3	MYC	9606.ENSP00000267101	9606.ENSP00000479618	0	0	0	0	0	0	0	0.609	0.609
ERBB3	TP53	9606.ENSP00000267101	9606.ENSP00000269305	0	0	0	0	0	0.130	0	0.633	0.667
ERBB3	ESR1	9606.ENSP00000267101	9606.ENSP00000405330	0	0	0	0	0	0.102	0	0.725	0.743
ERBB3	IGF2	9606.ENSP00000267101	9606.ENSP00000391826	0	0	0	0	0	0	0.600	0.391	0.745
ERBB3	MAPK8	9606.ENSP00000267101	9606.ENSP00000378974	0	0	0	0	0	0	0.900	0.292	0.926
ESR1	MAPK1	9606.ENSP00000405330	9606.ENSP00000215832	0	0	0	0	0	0.699	0.900	0.532	0.984
ESR1	MMP2	9606.ENSP00000405330	9606.ENSP00000219070	0	0	0	0	0	0	0	0.560	0.560
ESR1	SERPINE1	9606.ENSP00000405330	9606.ENSP00000223095	0	0	0	0	0	0.058	0	0.465	0.474
ESR1	IFNG	9606.ENSP00000405330	9606.ENSP00000229135	0	0	0	0	0	0	0	0.415	0.415
ESR1	MAPK14	9606.ENSP00000405330	9606.ENSP00000229795	0	0	0	0	0	0.264	0.900	0.458	0.956
ESR1	MDM2	9606.ENSP00000405330	9606.ENSP00000258149	0	0	0	0	0	0.757	0	0.810	0.952
ESR1	TYR	9606.ENSP00000405330	9606.ENSP00000263321	0	0	0	0	0	0	0	0.427	0.427
ESR1	IL1B	9606.ENSP00000405330	9606.ENSP00000263341	0	0	0	0	0	0	0	0.729	0.729
ESR1	RB1	9606.ENSP00000405330	9606.ENSP00000267163	0	0	0	0	0	0.077	0	0.782	0.790
ESR1	TP53	9606.ENSP00000405330	9606.ENSP00000269305	0	0	0	0	0	0.835	0	0.968	0.994
ESR1	SOD1	9606.ENSP00000405330	9606.ENSP00000270142	0	0	0	0	0.062	0	0	0.703	0.710
ESR1	GSTM1	9606.ENSP00000405330	9606.ENSP00000311469	0	0	0	0	0	0.062	0	0.406	0.419
ESR1	NQO1	9606.ENSP00000405330	9606.ENSP00000319788	0	0	0	0	0	0	0	0.486	0.486
ESR1	MMP1	9606.ENSP00000405330	9606.ENSP00000322788	0	0	0	0	0	0	0	0.418	0.418
ESR1	ESR2	9606.ENSP00000405330	9606.ENSP00000343925	0	0	0	0.925	0	0.873	0.900	0.991	0.987
ESR1	PARP1	9606.ENSP00000405330	9606.ENSP00000355759	0	0	0	0	0	0.292	0	0.932	0.950
ESR1	PTGS2	9606.ENSP00000405330	9606.ENSP00000356438	0	0	0	0	0	0.056	0	0.632	0.637
ESR1	PTPN1	9606.ENSP00000405330	9606.ENSP00000360683	0	0	0	0	0	0.291	0	0.300	0.482
ESR1	PCNA	9606.ENSP00000405330	9606.ENSP00000368458	0	0	0	0	0.049	0.079	0.900	0.075	0.908
ESR1	IGFBP3	9606.ENSP00000405330	9606.ENSP00000370473	0	0	0	0	0	0	0	0.518	0.518
ESR1	SPP1	9606.ENSP00000405330	9606.ENSP00000378517	0	0	0	0	0	0	0	0.599	0.599
ESR1	MAPK8	9606.ENSP00000405330	9606.ENSP00000378974	0	0	0	0	0	0	0.800	0.456	0.886
ESR1	NFE2L2	9606.ENSP00000405330	9606.ENSP00000380252	0	0	0	0	0	0.060	0	0.403	0.414
ESR1	RELA	9606.ENSP00000405330	9606.ENSP00000384273	0	0	0	0	0	0.757	0	0.730	0.931
ESR1	IL6	9606.ENSP00000405330	9606.ENSP00000385675	0	0	0	0	0	0	0	0.677	0.677
ESR1	IGF2	9606.ENSP00000405330	9606.ENSP00000391826	0	0	0	0	0	0	0	0.562	0.562
ESR1	MYC	9606.ENSP00000405330	9606.ENSP00000479618	0	0	0	0	0	0.644	0.600	0.825	0.973
ESR2	MAPK1	9606.ENSP00000343925	9606.ENSP00000215832	0	0	0	0	0	0.317	0.800	0.304	0.896
ESR2	MAPK14	9606.ENSP00000343925	9606.ENSP00000229795	0	0	0	0	0.062	0.104	0.800	0.244	0.855
ESR2	MDM2	9606.ENSP00000343925	9606.ENSP00000258149	0	0	0	0	0	0.282	0	0.309	0.482
ESR2	IL1B	9606.ENSP00000343925	9606.ENSP00000263341	0	0	0	0	0	0	0	0.460	0.459
ESR2	RB1	9606.ENSP00000343925	9606.ENSP00000267163	0	0	0	0	0	0.077	0	0.519	0.537
ESR2	TP53	9606.ENSP00000343925	9606.ENSP00000269305	0	0	0	0	0	0	0	0.881	0.881
ESR2	PTGS2	9606.ENSP00000343925	9606.ENSP00000356438	0	0	0	0	0	0.056	0	0.520	0.527
ESR2	IL6	9606.ENSP00000343925	9606.ENSP00000385675	0	0	0	0	0	0	0	0.535	0.535
ESR2	MYC	9606.ENSP00000343925	9606.ENSP00000479618	0	0	0	0	0	0.069	0	0.608	0.619
ESR2	MAPK8	9606.ENSP00000343925	9606.ENSP00000378974	0	0	0	0	0.062	0	0.800	0.232	0.843
F2	MAPK1	9606.ENSP00000308541	9606.ENSP00000215832	0	0	0	0	0	0.056	0.900	0.204	0.918
F2	SERPINE1	9606.ENSP00000308541	9606.ENSP00000223095	0	0	0	0	0.072	0.506	0	0.802	0.901
F2	MPO	9606.ENSP00000308541	9606.ENSP00000225275	0	0	0	0	0	0.056	0	0.503	0.510
F2	IFNG	9606.ENSP00000308541	9606.ENSP00000229135	0	0	0	0	0	0	0	0.402	0.402
F2	MAPK14	9606.ENSP00000308541	9606.ENSP00000229795	0	0	0	0	0	0.056	0	0.444	0.452
F2	TYR	9606.ENSP00000308541	9606.ENSP00000263321	0	0	0	0	0.527	0	0	0.053	0.532
F2	IL1B	9606.ENSP00000308541	9606.ENSP00000263341	0	0	0	0	0	0	0	0.556	0.556
F2	VCAM1	9606.ENSP00000308541	9606.ENSP00000294728	0	0	0	0	0	0	0	0.508	0.508
F2	SELE	9606.ENSP00000308541	9606.ENSP00000331736	0	0	0	0	0.049	0	0	0.553	0.556
F2	IL6	9606.ENSP00000308541	9606.ENSP00000385675	0	0	0	0	0	0	0	0.633	0.633
F2	SPP1	9606.ENSP00000308541	9606.ENSP00000378517	0	0	0	0	0.062	0.608	0	0.514	0.806
F2	IGF2	9606.ENSP00000308541	9606.ENSP00000391826	0	0	0	0	0.159	0	0.900	0.143	0.921
F2	IGFBP3	9606.ENSP00000308541	9606.ENSP00000370473	0	0	0	0	0.100	0.213	0.900	0.134	0.930
GSTM1	HMOX1	9606.ENSP00000311469	9606.ENSP00000216117	0	0	0	0	0	0	0	0.552	0.552
GSTM1	PON1	9606.ENSP00000311469	9606.ENSP00000222381	0	0	0	0	0.062	0	0	0.517	0.527
GSTM1	MPO	9606.ENSP00000311469	9606.ENSP00000225275	0	0	0	0	0	0	0	0.467	0.467
GSTM1	TP53	9606.ENSP00000311469	9606.ENSP00000269305	0	0	0	0	0	0	0	0.556	0.556
GSTM1	MYC	9606.ENSP00000311469	9606.ENSP00000479618	0	0	0	0	0	0	0	0.406	0.406
GSTM1	NFE2L2	9606.ENSP00000311469	9606.ENSP00000380252	0	0	0	0	0	0	0	0.503	0.503
GSTM1	NQO1	9606.ENSP00000311469	9606.ENSP00000319788	0	0	0	0	0.060	0	0	0.735	0.740
GSTM1	SPP1	9606.ENSP00000311469	9606.ENSP00000378517	0	0	0	0	0	0	0	0.932	0.932
HMOX1	IL2	9606.ENSP00000216117	9606.ENSP00000226730	0	0	0	0	0	0	0	0.414	0.414
HMOX1	IL1A	9606.ENSP00000216117	9606.ENSP00000263339	0	0	0	0	0	0	0	0.426	0.426
HMOX1	MYC	9606.ENSP00000216117	9606.ENSP00000479618	0	0	0	0	0	0	0	0.427	0.426
HMOX1	MMP1	9606.ENSP00000216117	9606.ENSP00000322788	0	0	0	0	0.068	0	0	0.415	0.431
HMOX1	IFNG	9606.ENSP00000216117	9606.ENSP00000229135	0	0	0	0	0	0	0	0.475	0.475
HMOX1	MMP2	9606.ENSP00000216117	9606.ENSP00000219070	0	0	0	0	0	0	0	0.486	0.486
HMOX1	MAPK8	9606.ENSP00000216117	9606.ENSP00000378974	0	0	0	0	0	0	0	0.503	0.503
HMOX1	SPP1	9606.ENSP00000216117	9606.ENSP00000378517	0	0	0	0	0.062	0	0	0.494	0.505
HMOX1	SELE	9606.ENSP00000216117	9606.ENSP00000331736	0	0	0	0	0	0	0	0.509	0.509
HMOX1	SERPINE1	9606.ENSP00000216117	9606.ENSP00000223095	0	0	0	0	0.085	0	0	0.500	0.523
HMOX1	TP53	9606.ENSP00000216117	9606.ENSP00000269305	0	0	0	0	0.062	0	0	0.611	0.619
HMOX1	VCAM1	9606.ENSP00000216117	9606.ENSP00000294728	0	0	0	0	0.062	0	0	0.616	0.624
HMOX1	MPO	9606.ENSP00000216117	9606.ENSP00000225275	0	0	0	0	0	0	0	0.652	0.652
HMOX1	ICAM1	9606.ENSP00000216117	9606.ENSP00000264832	0	0	0	0	0.077	0	0	0.653	0.666
HMOX1	SOD1	9606.ENSP00000216117	9606.ENSP00000270142	0	0	0	0	0	0	0	0.708	0.708
HMOX1	NOS2	9606.ENSP00000216117	9606.ENSP00000327251	0	0	0	0	0	0.177	0	0.667	0.714
HMOX1	PTGS2	9606.ENSP00000216117	9606.ENSP00000356438	0	0	0	0	0.076	0	0	0.745	0.754
HMOX1	IL1B	9606.ENSP00000216117	9606.ENSP00000263341	0	0	0	0	0.070	0	0	0.760	0.767
HMOX1	IL6	9606.ENSP00000216117	9606.ENSP00000385675	0	0	0	0	0.073	0	0	0.780	0.787
HMOX1	NQO1	9606.ENSP00000216117	9606.ENSP00000319788	0	0	0	0	0.058	0	0	0.915	0.916
HMOX1	MAPK14	9606.ENSP00000216117	9606.ENSP00000229795	0	0	0	0	0	0	0.900	0.407	0.938
HMOX1	NFE2L2	9606.ENSP00000216117	9606.ENSP00000380252	0	0	0	0	0	0	0.900	0.916	0.991
ICAM1	MMP2	9606.ENSP00000264832	9606.ENSP00000219070	0	0	0	0	0	0	0	0.611	0.611
ICAM1	SERPINE1	9606.ENSP00000264832	9606.ENSP00000223095	0	0	0	0	0.088	0	0	0.703	0.718
ICAM1	MPO	9606.ENSP00000264832	9606.ENSP00000225275	0	0	0	0	0	0	0	0.740	0.740
ICAM1	IL2	9606.ENSP00000264832	9606.ENSP00000226730	0	0	0	0	0	0	0	0.733	0.733
ICAM1	IFNG	9606.ENSP00000264832	9606.ENSP00000229135	0	0	0	0	0	0	0	0.738	0.738
ICAM1	MDM2	9606.ENSP00000264832	9606.ENSP00000258149	0	0	0	0	0	0	0	0.662	0.662
ICAM1	IL1A	9606.ENSP00000264832	9606.ENSP00000263339	0	0	0	0	0.113	0	0	0.701	0.723
ICAM1	IL1B	9606.ENSP00000264832	9606.ENSP00000263341	0	0	0	0	0.154	0	0	0.858	0.874
ICAM1	NFE2L2	9606.ENSP00000264832	9606.ENSP00000380252	0	0	0	0	0	0	0	0.413	0.412
ICAM1	MAPK8	9606.ENSP00000264832	9606.ENSP00000378974	0	0	0	0	0	0	0	0.426	0.426
ICAM1	MYC	9606.ENSP00000264832	9606.ENSP00000479618	0	0	0	0	0.052	0	0	0.467	0.473
ICAM1	SPP1	9606.ENSP00000264832	9606.ENSP00000378517	0	0	0	0	0	0	0	0.538	0.538
ICAM1	NOS2	9606.ENSP00000264832	9606.ENSP00000327251	0	0	0	0	0	0.062	0	0.533	0.543
ICAM1	TP53	9606.ENSP00000264832	9606.ENSP00000269305	0	0	0	0	0.062	0	0	0.559	0.568
ICAM1	MMP1	9606.ENSP00000264832	9606.ENSP00000322788	0	0	0	0	0.088	0	0	0.568	0.589
ICAM1	PTGS2	9606.ENSP00000264832	9606.ENSP00000356438	0	0	0	0	0.123	0	0	0.702	0.728
ICAM1	RELA	9606.ENSP00000264832	9606.ENSP00000384273	0	0	0	0	0.065	0.681	0	0.639	0.883
ICAM1	IL6	9606.ENSP00000264832	9606.ENSP00000385675	0	0	0	0	0.152	0	0	0.876	0.890
ICAM1	SELE	9606.ENSP00000264832	9606.ENSP00000331736	0	0	0	0	0.061	0	0	0.915	0.916
ICAM1	VCAM1	9606.ENSP00000264832	9606.ENSP00000294728	0	0	0	0	0.069	0	0	0.928	0.930
IFNG	MAPK1	9606.ENSP00000229135	9606.ENSP00000215832	0	0	0	0	0	0	0	0.415	0.415
IFNG	MMP2	9606.ENSP00000229135	9606.ENSP00000219070	0	0	0	0	0	0	0	0.457	0.457
IFNG	SERPINE1	9606.ENSP00000229135	9606.ENSP00000223095	0	0	0	0	0	0	0	0.472	0.472
IFNG	MPO	9606.ENSP00000229135	9606.ENSP00000225275	0	0	0	0	0	0	0	0.593	0.593
IFNG	IL2	9606.ENSP00000229135	9606.ENSP00000226730	0	0	0	0	0.087	0	0	0.902	0.907
IFNG	MMP1	9606.ENSP00000229135	9606.ENSP00000322788	0	0	0	0	0.053	0	0	0.425	0.432
IFNG	MYC	9606.ENSP00000229135	9606.ENSP00000479618	0	0	0	0	0	0	0	0.464	0.464
IFNG	SPP1	9606.ENSP00000229135	9606.ENSP00000378517	0	0	0	0	0	0	0	0.478	0.478
IFNG	MAPK14	9606.ENSP00000229135	9606.ENSP00000229795	0	0	0	0	0	0	0	0.564	0.564
IFNG	SELE	9606.ENSP00000229135	9606.ENSP00000331736	0	0	0	0	0	0	0	0.588	0.588
IFNG	PTGS2	9606.ENSP00000229135	9606.ENSP00000356438	0	0	0	0	0	0	0	0.643	0.643
IFNG	VCAM1	9606.ENSP00000229135	9606.ENSP00000294728	0	0	0	0	0	0	0	0.649	0.649
IFNG	TP53	9606.ENSP00000229135	9606.ENSP00000269305	0	0	0	0	0	0	0	0.657	0.657
IFNG	IL10RB	9606.ENSP00000229135	9606.ENSP00000290200	0	0	0	0	0	0	0.600	0.387	0.744
IFNG	NOS2	9606.ENSP00000229135	9606.ENSP00000327251	0	0	0	0	0	0	0	0.764	0.764
IFNG	IL1A	9606.ENSP00000229135	9606.ENSP00000263339	0	0	0	0	0	0	0	0.768	0.768
IFNG	IL4R	9606.ENSP00000229135	9606.ENSP00000379111	0	0	0	0	0	0	0.600	0.530	0.804
IFNG	IL1B	9606.ENSP00000229135	9606.ENSP00000263341	0	0	0	0	0.080	0	0	0.903	0.907
IFNG	PTPN1	9606.ENSP00000229135	9606.ENSP00000360683	0	0	0	0	0	0	0.900	0.177	0.914
IFNG	IL6	9606.ENSP00000229135	9606.ENSP00000385675	0	0	0	0	0.066	0	0	0.942	0.943
IFNG	RELA	9606.ENSP00000229135	9606.ENSP00000384273	0	0	0	0	0	0	0.900	0.475	0.945
IGF2	MMP2	9606.ENSP00000391826	9606.ENSP00000219070	0	0	0	0	0.165	0	0.900	0.394	0.944
IGF2	MDM2	9606.ENSP00000391826	9606.ENSP00000258149	0	0	0	0	0.062	0	0	0.393	0.406
IGF2	IL1B	9606.ENSP00000391826	9606.ENSP00000263341	0	0	0	0	0	0	0	0.401	0.400
IGF2	TP53	9606.ENSP00000391826	9606.ENSP00000269305	0	0	0	0	0	0	0	0.658	0.658
IGF2	MMP1	9606.ENSP00000391826	9606.ENSP00000322788	0	0	0	0	0.076	0	0.900	0.266	0.926
IGF2	IGFBP3	9606.ENSP00000391826	9606.ENSP00000370473	0	0	0	0	0.155	0.873	0.600	0.989	0.999
IGF2	SPP1	9606.ENSP00000391826	9606.ENSP00000378517	0	0	0	0	0.076	0	0	0.459	0.478
IGF2	IL6	9606.ENSP00000391826	9606.ENSP00000385675	0	0	0	0	0	0	0	0.529	0.529
IGF2	MYC	9606.ENSP00000391826	9606.ENSP00000479618	0	0	0	0	0	0	0	0.610	0.610
IGFBP3	MMP2	9606.ENSP00000370473	9606.ENSP00000219070	0	0	0	0	0.196	0.213	0.900	0.392	0.956
IGFBP3	SERPINE1	9606.ENSP00000370473	9606.ENSP00000223095	0	0	0	0	0.192	0	0	0.547	0.618
IGFBP3	MDM2	9606.ENSP00000370473	9606.ENSP00000258149	0	0	0	0	0	0	0	0.456	0.456
IGFBP3	IL1B	9606.ENSP00000370473	9606.ENSP00000263341	0	0	0	0	0	0	0	0.425	0.424
IGFBP3	TP53	9606.ENSP00000370473	9606.ENSP00000269305	0	0	0	0	0	0	0.900	0.653	0.963
IGFBP3	MMP1	9606.ENSP00000370473	9606.ENSP00000322788	0	0	0	0	0.142	0.213	0.900	0.335	0.949
IGFBP3	PTGS2	9606.ENSP00000370473	9606.ENSP00000356438	0	0	0	0	0.087	0	0	0.391	0.420
IGFBP3	MYC	9606.ENSP00000370473	9606.ENSP00000479618	0	0	0	0	0	0	0	0.401	0.400
IGFBP3	SPP1	9606.ENSP00000370473	9606.ENSP00000378517	0	0	0	0	0.070	0	0	0.404	0.422
IGFBP3	IL6	9606.ENSP00000370473	9606.ENSP00000385675	0	0	0	0	0.076	0	0	0.558	0.574
IGFBP3	MAPK8	9606.ENSP00000370473	9606.ENSP00000378974	0	0	0	0	0	0	0.900	0.198	0.916
IL10RB	IL2	9606.ENSP00000290200	9606.ENSP00000226730	0	0	0	0	0	0	0.600	0.487	0.786
IL10RB	IL1B	9606.ENSP00000290200	9606.ENSP00000263341	0	0	0	0	0.072	0	0	0.459	0.476
IL10RB	IL4R	9606.ENSP00000290200	9606.ENSP00000379111	0	0	0	0	0.081	0	0	0.405	0.430
IL10RB	IL6	9606.ENSP00000290200	9606.ENSP00000385675	0	0	0	0	0	0	0.600	0.511	0.796
IL1A	MMP2	9606.ENSP00000263339	9606.ENSP00000219070	0	0	0	0	0	0	0	0.520	0.520
IL1A	SERPINE1	9606.ENSP00000263339	9606.ENSP00000223095	0	0	0	0	0.093	0	0	0.522	0.548
IL1A	MPO	9606.ENSP00000263339	9606.ENSP00000225275	0	0	0	0	0.064	0	0	0.556	0.566
IL1A	IL2	9606.ENSP00000263339	9606.ENSP00000226730	0	0	0	0	0	0	0	0.845	0.845
IL1A	SPP1	9606.ENSP00000263339	9606.ENSP00000378517	0	0	0	0	0.062	0	0	0.455	0.466
IL1A	IL4R	9606.ENSP00000263339	9606.ENSP00000379111	0	0	0	0	0.071	0	0	0.458	0.475
IL1A	NOS2	9606.ENSP00000263339	9606.ENSP00000327251	0	0	0	0	0.063	0	0	0.501	0.512
IL1A	SELE	9606.ENSP00000263339	9606.ENSP00000331736	0	0	0	0	0.062	0	0	0.610	0.618
IL1A	MMP1	9606.ENSP00000263339	9606.ENSP00000322788	0	0	0	0	0.111	0	0	0.609	0.637
IL1A	VCAM1	9606.ENSP00000263339	9606.ENSP00000294728	0	0	0	0	0.062	0	0	0.636	0.643
IL1A	TP53	9606.ENSP00000263339	9606.ENSP00000269305	0	0	0	0	0	0.128	0	0.610	0.645
IL1A	PTGS2	9606.ENSP00000263339	9606.ENSP00000356438	0	0	0	0	0.212	0	0	0.681	0.737
IL1A	RELA	9606.ENSP00000263339	9606.ENSP00000384273	0	0	0	0	0	0	0.900	0.505	0.948
IL1A	IL6	9606.ENSP00000263339	9606.ENSP00000385675	0	0	0	0	0.376	0	0.900	0.910	0.993
IL1A	IL1B	9606.ENSP00000263339	9606.ENSP00000263341	0	0	0	0	0.761	0	0.800	0.916	0.995
IL1B	MAPK1	9606.ENSP00000263341	9606.ENSP00000215832	0	0	0	0	0	0	0	0.426	0.426
IL1B	MMP2	9606.ENSP00000263341	9606.ENSP00000219070	0	0	0	0	0	0.279	0	0.703	0.776
IL1B	SERPINE1	9606.ENSP00000263341	9606.ENSP00000223095	0	0	0	0	0.063	0	0	0.681	0.688
IL1B	MPO	9606.ENSP00000263341	9606.ENSP00000225275	0	0	0	0	0.098	0	0	0.833	0.843
IL1B	IL2	9606.ENSP00000263341	9606.ENSP00000226730	0	0	0	0	0	0	0	0.876	0.876
IL1B	MAPK14	9606.ENSP00000263341	9606.ENSP00000229795	0	0	0	0	0	0	0.900	0.734	0.972
IL1B	PARP1	9606.ENSP00000263341	9606.ENSP00000355759	0	0	0	0	0	0	0	0.456	0.456
IL1B	PTPN1	9606.ENSP00000263341	9606.ENSP00000360683	0	0	0	0	0	0.270	0	0.362	0.514
IL1B	IL4R	9606.ENSP00000263341	9606.ENSP00000379111	0	0	0	0	0.103	0	0	0.518	0.549
IL1B	SOD1	9606.ENSP00000263341	9606.ENSP00000270142	0	0	0	0	0	0	0	0.562	0.562
IL1B	NQO1	9606.ENSP00000263341	9606.ENSP00000319788	0	0	0	0	0	0	0	0.564	0.564
IL1B	MYC	9606.ENSP00000263341	9606.ENSP00000479618	0	0	0	0	0.049	0.108	0	0.560	0.594
IL1B	SPP1	9606.ENSP00000263341	9606.ENSP00000378517	0	0	0	0	0.062	0	0	0.617	0.625
IL1B	NFE2L2	9606.ENSP00000263341	9606.ENSP00000380252	0	0	0	0	0	0	0	0.652	0.652
IL1B	MAPK8	9606.ENSP00000263341	9606.ENSP00000378974	0	0	0	0	0	0	0	0.658	0.658
IL1B	TP53	9606.ENSP00000263341	9606.ENSP00000269305	0	0	0	0	0	0	0	0.689	0.689
IL1B	SELE	9606.ENSP00000263341	9606.ENSP00000331736	0	0	0	0	0.062	0	0	0.753	0.758
IL1B	MMP1	9606.ENSP00000263341	9606.ENSP00000322788	0	0	0	0	0.128	0.058	0	0.742	0.770
IL1B	NOS2	9606.ENSP00000263341	9606.ENSP00000327251	0	0	0	0	0.068	0	0	0.807	0.813
IL1B	VCAM1	9606.ENSP00000263341	9606.ENSP00000294728	0	0	0	0	0.062	0	0	0.826	0.830
IL1B	PTGS2	9606.ENSP00000263341	9606.ENSP00000356438	0	0	0	0	0.561	0	0	0.877	0.944
IL1B	RELA	9606.ENSP00000263341	9606.ENSP00000384273	0	0	0	0	0	0	0.900	0.793	0.978
IL1B	IL6	9606.ENSP00000263341	9606.ENSP00000385675	0	0	0	0	0.427	0	0.900	0.953	0.997
IL2	MAPK1	9606.ENSP00000226730	9606.ENSP00000215832	0	0	0	0	0	0	0.900	0.346	0.931
IL2	MMP2	9606.ENSP00000226730	9606.ENSP00000219070	0	0	0	0	0	0	0	0.424	0.424
IL2	MPO	9606.ENSP00000226730	9606.ENSP00000225275	0	0	0	0	0	0	0	0.516	0.516
IL2	PARP1	9606.ENSP00000226730	9606.ENSP00000355759	0	0	0	0	0	0	0	0.450	0.450
IL2	MDM2	9606.ENSP00000226730	9606.ENSP00000258149	0	0	0	0	0	0	0	0.474	0.474
IL2	NOS2	9606.ENSP00000226730	9606.ENSP00000327251	0	0	0	0	0	0	0	0.487	0.487
IL2	TYR	9606.ENSP00000226730	9606.ENSP00000263321	0	0	0	0	0	0	0	0.509	0.509
IL2	SELE	9606.ENSP00000226730	9606.ENSP00000331736	0	0	0	0	0	0	0	0.533	0.533
IL2	PTGS2	9606.ENSP00000226730	9606.ENSP00000356438	0	0	0	0	0	0	0	0.577	0.577
IL2	MYC	9606.ENSP00000226730	9606.ENSP00000479618	0	0	0	0	0	0	0	0.601	0.601
IL2	VCAM1	9606.ENSP00000226730	9606.ENSP00000294728	0	0	0	0	0	0	0	0.603	0.603
IL2	TP53	9606.ENSP00000226730	9606.ENSP00000269305	0	0	0	0	0	0	0	0.667	0.667
IL2	IL4R	9606.ENSP00000226730	9606.ENSP00000379111	0	0	0	0	0	0	0.600	0.665	0.860
IL2	IL6	9606.ENSP00000226730	9606.ENSP00000385675	0	0	0	0	0	0	0	0.914	0.914
IL2	MAPK8	9606.ENSP00000226730	9606.ENSP00000378974	0	0	0	0	0	0	0.900	0.401	0.937
IL2	MAPK14	9606.ENSP00000226730	9606.ENSP00000229795	0	0	0	0	0	0	0.900	0.412	0.938
IL2	RELA	9606.ENSP00000226730	9606.ENSP00000384273	0	0	0	0	0	0.486	0.900	0.500	0.972
IL4R	MAPK14	9606.ENSP00000379111	9606.ENSP00000229795	0	0	0	0	0	0	0.900	0.119	0.908
IL4R	VCAM1	9606.ENSP00000379111	9606.ENSP00000294728	0	0	0	0	0.246	0	0	0.315	0.461
IL4R	IL6	9606.ENSP00000379111	9606.ENSP00000385675	0	0	0	0	0.072	0	0.600	0.566	0.824
IL6	MAPK1	9606.ENSP00000385675	9606.ENSP00000215832	0	0	0	0	0	0	0.900	0.589	0.957
IL6	MMP2	9606.ENSP00000385675	9606.ENSP00000219070	0	0	0	0	0.076	0	0.900	0.715	0.971
IL6	PON1	9606.ENSP00000385675	9606.ENSP00000222381	0	0	0	0	0	0	0	0.505	0.505
IL6	SERPINE1	9606.ENSP00000385675	9606.ENSP00000223095	0	0	0	0	0.160	0	0	0.803	0.827
IL6	MPO	9606.ENSP00000385675	9606.ENSP00000225275	0	0	0	0	0.062	0	0	0.839	0.843
IL6	MAPK14	9606.ENSP00000385675	9606.ENSP00000229795	0	0	0	0	0	0	0	0.758	0.758
IL6	MDM2	9606.ENSP00000385675	9606.ENSP00000258149	0	0	0	0	0	0	0	0.429	0.429
IL6	TP53	9606.ENSP00000385675	9606.ENSP00000269305	0	0	0	0	0.062	0	0	0.738	0.744
IL6	SOD1	9606.ENSP00000385675	9606.ENSP00000270142	0	0	0	0	0	0	0	0.535	0.535
IL6	VCAM1	9606.ENSP00000385675	9606.ENSP00000294728	0	0	0	0	0.083	0	0	0.860	0.866
IL6	NQO1	9606.ENSP00000385675	9606.ENSP00000319788	0	0	0	0	0	0	0	0.570	0.570
IL6	MMP1	9606.ENSP00000385675	9606.ENSP00000322788	0	0	0	0	0.154	0	0.900	0.710	0.973
IL6	NOS2	9606.ENSP00000385675	9606.ENSP00000327251	0	0	0	0	0.063	0	0	0.784	0.789
IL6	SELE	9606.ENSP00000385675	9606.ENSP00000331736	0	0	0	0	0.121	0	0	0.803	0.819
IL6	PARP1	9606.ENSP00000385675	9606.ENSP00000355759	0	0	0	0	0	0	0	0.429	0.429
IL6	PTGS2	9606.ENSP00000385675	9606.ENSP00000356438	0	0	0	0	0.312	0	0	0.878	0.913
IL6	PTPN1	9606.ENSP00000385675	9606.ENSP00000360683	0	0	0	0	0.062	0	0	0.431	0.443
IL6	SPP1	9606.ENSP00000385675	9606.ENSP00000378517	0	0	0	0	0.062	0	0	0.687	0.694
IL6	MAPK8	9606.ENSP00000385675	9606.ENSP00000378974	0	0	0	0	0	0	0	0.668	0.668
IL6	NFE2L2	9606.ENSP00000385675	9606.ENSP00000380252	0	0	0	0	0	0	0	0.634	0.634
IL6	RELA	9606.ENSP00000385675	9606.ENSP00000384273	0	0	0	0	0	0.270	0.900	0.707	0.976
IL6	MYC	9606.ENSP00000385675	9606.ENSP00000479618	0	0	0	0	0	0	0	0.685	0.685
MAOA	MAOB	9606.ENSP00000340684	9606.ENSP00000367309	0	0	0.448	0.976	0.180	0.307	0.800	0.918	0.880
MAPK1	MDM2	9606.ENSP00000215832	9606.ENSP00000258149	0	0	0	0	0.062	0	0	0.404	0.417
MAPK1	PTGS2	9606.ENSP00000215832	9606.ENSP00000356438	0	0	0	0	0	0.176	0	0.393	0.478
MAPK1	PPP3CA	9606.ENSP00000215832	9606.ENSP00000378323	0	0	0	0	0.064	0.250	0	0.394	0.537
MAPK1	PTPN1	9606.ENSP00000215832	9606.ENSP00000360683	0	0	0	0	0.092	0.382	0	0.326	0.589
MAPK1	PARP1	9606.ENSP00000215832	9606.ENSP00000355759	0	0	0	0	0.063	0.270	0	0.651	0.741
MAPK1	MAPK8	9606.ENSP00000215832	9606.ENSP00000378974	0	0	0.386	0.886	0.081	0.225	0.900	0.735	0.931
MAPK1	RB1	9606.ENSP00000215832	9606.ENSP00000267163	0	0	0	0	0.062	0.213	0.900	0.296	0.941
MAPK1	RELA	9606.ENSP00000215832	9606.ENSP00000384273	0	0	0	0	0	0.118	0.900	0.419	0.944
MAPK1	MAPK14	9606.ENSP00000215832	9606.ENSP00000229795	0	0	0.412	0.926	0.106	0.874	0.800	0.776	0.977
MAPK1	MYC	9606.ENSP00000215832	9606.ENSP00000479618	0	0	0	0	0	0.666	0.900	0.571	0.984
MAPK1	TP53	9606.ENSP00000215832	9606.ENSP00000269305	0	0	0	0	0.055	0.876	0.800	0.695	0.991
MAPK14	PARP1	9606.ENSP00000229795	9606.ENSP00000355759	0	0	0	0	0.061	0	0	0.416	0.428
MAPK14	PPP3CA	9606.ENSP00000229795	9606.ENSP00000378323	0	0	0	0	0.103	0.250	0	0.261	0.460
MAPK14	VCAM1	9606.ENSP00000229795	9606.ENSP00000294728	0	0	0	0	0	0	0	0.487	0.488
MAPK14	PTPN1	9606.ENSP00000229795	9606.ENSP00000360683	0	0	0	0	0.065	0.247	0	0.341	0.495
MAPK14	NOS2	9606.ENSP00000229795	9606.ENSP00000327251	0	0	0	0	0.049	0	0	0.496	0.500
MAPK14	PTGS2	9606.ENSP00000229795	9606.ENSP00000356438	0	0	0	0	0	0.065	0	0.624	0.633
MAPK14	MAPK8	9606.ENSP00000229795	9606.ENSP00000378974	0	0	0.396	0.924	0.066	0.470	0.600	0.814	0.803
MAPK14	MYC	9606.ENSP00000229795	9606.ENSP00000479618	0	0	0	0	0	0.129	0.900	0.520	0.954
MAPK14	RELA	9606.ENSP00000229795	9606.ENSP00000384273	0	0	0	0	0	0.128	0.900	0.525	0.955
MAPK14	RB1	9606.ENSP00000229795	9606.ENSP00000267163	0	0	0	0	0.062	0.839	0.900	0.208	0.986
MAPK14	TP53	9606.ENSP00000229795	9606.ENSP00000269305	0	0	0	0	0	0.878	0.900	0.655	0.995
MAPK8	MMP2	9606.ENSP00000378974	9606.ENSP00000219070	0	0	0	0	0	0	0	0.511	0.511
MAPK8	MDM2	9606.ENSP00000378974	9606.ENSP00000258149	0	0	0	0	0.062	0	0	0.393	0.407
MAPK8	RB1	9606.ENSP00000378974	9606.ENSP00000267163	0	0	0	0	0	0.308	0	0.198	0.422
MAPK8	TP53	9606.ENSP00000378974	9606.ENSP00000269305	0	0	0	0	0	0.884	0.900	0.827	0.997
MAPK8	MMP1	9606.ENSP00000378974	9606.ENSP00000322788	0	0	0	0	0	0	0	0.408	0.408
MAPK8	NOS2	9606.ENSP00000378974	9606.ENSP00000327251	0	0	0	0	0.053	0	0	0.397	0.405
MAPK8	PTGS2	9606.ENSP00000378974	9606.ENSP00000356438	0	0	0	0	0	0	0	0.564	0.564
MAPK8	PPP3CA	9606.ENSP00000378974	9606.ENSP00000378323	0	0	0	0	0.052	0.064	0	0.418	0.438
MAPK8	NFE2L2	9606.ENSP00000378974	9606.ENSP00000380252	0	0	0	0	0	0.494	0	0.413	0.690
MAPK8	MYC	9606.ENSP00000378974	9606.ENSP00000479618	0	0	0	0	0	0.462	0	0.562	0.754
MAPK8	RELA	9606.ENSP00000378974	9606.ENSP00000384273	0	0	0	0	0	0	0.800	0.587	0.913
MDM2	PARP1	9606.ENSP00000258149	9606.ENSP00000355759	0	0	0	0	0	0	0	0.460	0.460
MDM2	NQO1	9606.ENSP00000258149	9606.ENSP00000319788	0	0	0	0	0	0	0	0.471	0.471
MDM2	PCNA	9606.ENSP00000258149	9606.ENSP00000368458	0	0	0	0	0	0.486	0	0.107	0.521
MDM2	PTGS2	9606.ENSP00000258149	9606.ENSP00000356438	0	0	0	0	0.060	0.176	0	0.513	0.590
MDM2	RELA	9606.ENSP00000258149	9606.ENSP00000384273	0	0	0	0	0	0.314	0	0.455	0.610
MDM2	MYC	9606.ENSP00000258149	9606.ENSP00000479618	0	0	0	0	0	0.129	0	0.811	0.829
MDM2	RB1	9606.ENSP00000258149	9606.ENSP00000267163	0	0	0	0	0.062	0.881	0.900	0.875	0.998
MDM2	TP53	9606.ENSP00000258149	9606.ENSP00000269305	0	0	0	0	0.240	0.998	0.900	0.995	0.999
MMP1	MMP2	9606.ENSP00000322788	9606.ENSP00000219070	0	0	0	0.869	0.154	0	0.900	0.883	0.921
MMP1	SERPINE1	9606.ENSP00000322788	9606.ENSP00000223095	0	0	0	0	0.303	0.056	0	0.567	0.690
MMP1	MPO	9606.ENSP00000322788	9606.ENSP00000225275	0	0	0	0	0	0	0	0.405	0.405
MMP1	TP53	9606.ENSP00000322788	9606.ENSP00000269305	0	0	0	0	0	0	0	0.524	0.524
MMP1	VCAM1	9606.ENSP00000322788	9606.ENSP00000294728	0	0	0	0	0.065	0	0	0.526	0.537
MMP1	PRSS1	9606.ENSP00000322788	9606.ENSP00000308720	0	0	0	0	0.066	0	0.900	0.086	0.907
MMP1	MYC	9606.ENSP00000322788	9606.ENSP00000479618	0	0	0	0	0	0	0	0.413	0.413
MMP1	SELE	9606.ENSP00000322788	9606.ENSP00000331736	0	0	0	0	0.052	0	0	0.460	0.466
MMP1	SPP1	9606.ENSP00000322788	9606.ENSP00000378517	0	0	0	0	0.049	0	0	0.517	0.521
MMP1	PTGS2	9606.ENSP00000322788	9606.ENSP00000356438	0	0	0	0	0.138	0	0	0.618	0.657
MMP2	PARP1	9606.ENSP00000219070	9606.ENSP00000355759	0	0	0	0	0	0	0	0.451	0.451
MMP2	SELE	9606.ENSP00000219070	9606.ENSP00000331736	0	0	0	0	0	0	0	0.504	0.504
MMP2	MPO	9606.ENSP00000219070	9606.ENSP00000225275	0	0	0	0	0	0	0	0.505	0.505
MMP2	MYC	9606.ENSP00000219070	9606.ENSP00000479618	0	0	0	0	0	0	0	0.606	0.606
MMP2	VCAM1	9606.ENSP00000219070	9606.ENSP00000294728	0	0	0	0	0.109	0	0	0.602	0.630
MMP2	PTGS2	9606.ENSP00000219070	9606.ENSP00000356438	0	0	0	0	0.066	0	0	0.654	0.663
MMP2	TP53	9606.ENSP00000219070	9606.ENSP00000269305	0	0	0	0	0.062	0	0	0.669	0.676
MMP2	SPP1	9606.ENSP00000219070	9606.ENSP00000378517	0	0	0	0	0.076	0	0	0.691	0.702
MMP2	SERPINE1	9606.ENSP00000219070	9606.ENSP00000223095	0	0	0	0	0.218	0.056	0	0.662	0.729
MPO	PON1	9606.ENSP00000225275	9606.ENSP00000222381	0	0	0	0	0	0	0	0.923	0.923
MPO	SERPINE1	9606.ENSP00000225275	9606.ENSP00000223095	0	0	0	0	0	0	0	0.517	0.517
MPO	TP53	9606.ENSP00000225275	9606.ENSP00000269305	0	0	0	0	0	0	0	0.424	0.424
MPO	NFE2L2	9606.ENSP00000225275	9606.ENSP00000380252	0	0	0	0	0	0	0	0.470	0.470
MPO	NQO1	9606.ENSP00000225275	9606.ENSP00000319788	0	0	0	0	0	0	0	0.505	0.505
MPO	NOS2	9606.ENSP00000225275	9606.ENSP00000327251	0	0	0	0	0	0.090	0	0.535	0.559
MPO	VCAM1	9606.ENSP00000225275	9606.ENSP00000294728	0	0	0	0	0	0	0	0.633	0.633
MPO	SELE	9606.ENSP00000225275	9606.ENSP00000331736	0	0	0	0	0	0.056	0	0.636	0.641
MPO	PTGS2	9606.ENSP00000225275	9606.ENSP00000356438	0	0	0	0	0.065	0	0	0.644	0.653
MYC	SERPINE1	9606.ENSP00000479618	9606.ENSP00000223095	0	0	0	0	0.096	0	0	0.456	0.487
MYC	RB1	9606.ENSP00000479618	9606.ENSP00000267163	0	0	0	0	0	0.671	0	0.611	0.866
MYC	TP53	9606.ENSP00000479618	9606.ENSP00000269305	0	0	0	0	0.091	0.274	0	0.893	0.923
MYC	NQO1	9606.ENSP00000479618	9606.ENSP00000319788	0	0	0	0	0.065	0	0	0.391	0.406
MYC	NOS2	9606.ENSP00000479618	9606.ENSP00000327251	0	0	0	0	0	0	0.900	0.254	0.922
MYC	PARP1	9606.ENSP00000479618	9606.ENSP00000355759	0	0	0	0	0	0.066	0	0.635	0.645
MYC	PTGS2	9606.ENSP00000479618	9606.ENSP00000356438	0	0	0	0	0	0	0	0.595	0.595
MYC	SPP1	9606.ENSP00000479618	9606.ENSP00000378517	0	0	0	0	0	0	0	0.459	0.459
MYC	NFE2L2	9606.ENSP00000479618	9606.ENSP00000380252	0	0	0	0	0	0.528	0	0.508	0.758
MYC	RELA	9606.ENSP00000479618	9606.ENSP00000384273	0	0	0	0	0	0.603	0.900	0.666	0.985
NFE2L2	TP53	9606.ENSP00000380252	9606.ENSP00000269305	0	0	0	0	0	0.057	0	0.756	0.760
NFE2L2	SOD1	9606.ENSP00000380252	9606.ENSP00000270142	0	0	0	0	0	0	0	0.704	0.704
NFE2L2	NQO1	9606.ENSP00000380252	9606.ENSP00000319788	0	0	0	0	0	0.270	0	0.876	0.905
NFE2L2	PTGS2	9606.ENSP00000380252	9606.ENSP00000356438	0	0	0	0	0	0	0	0.611	0.611
NFE2L2	RELA	9606.ENSP00000380252	9606.ENSP00000384273	0	0	0	0	0	0.312	0	0.330	0.519
NOS2	TP53	9606.ENSP00000327251	9606.ENSP00000269305	0	0	0	0	0	0	0	0.417	0.417
NOS2	SOD1	9606.ENSP00000327251	9606.ENSP00000270142	0	0	0	0	0	0.115	0	0.406	0.452
NOS2	VCAM1	9606.ENSP00000327251	9606.ENSP00000294728	0	0	0	0	0	0	0	0.481	0.481
NOS2	SELE	9606.ENSP00000327251	9606.ENSP00000331736	0	0	0	0	0.063	0	0	0.405	0.419
NOS2	PTGS2	9606.ENSP00000327251	9606.ENSP00000356438	0	0	0	0	0.063	0.182	0	0.805	0.838
NOS2	RELA	9606.ENSP00000327251	9606.ENSP00000384273	0	0	0	0	0	0.524	0.900	0.384	0.968
NQO1	TP53	9606.ENSP00000319788	9606.ENSP00000269305	0	0	0	0	0	0.835	0	0.978	0.996
NQO1	SOD1	9606.ENSP00000319788	9606.ENSP00000270142	0	0	0	0	0.062	0	0	0.638	0.646
NQO1	PTGS2	9606.ENSP00000319788	9606.ENSP00000356438	0	0	0	0	0	0	0	0.506	0.506
NQO1	PARP1	9606.ENSP00000319788	9606.ENSP00000355759	0	0	0	0	0	0.270	0	0.391	0.536
PARP1	RB1	9606.ENSP00000355759	9606.ENSP00000267163	0	0	0	0	0.064	0	0	0.448	0.462
PARP1	TP53	9606.ENSP00000355759	9606.ENSP00000269305	0	0	0	0	0.062	0.757	0	0.931	0.983
PARP1	RELA	9606.ENSP00000355759	9606.ENSP00000384273	0	0	0	0	0	0.688	0	0.397	0.804
PARP1	PCNA	9606.ENSP00000355759	9606.ENSP00000368458	0	0	0	0	0.341	0.753	0.600	0.080	0.932
PCNA	RB1	9606.ENSP00000368458	9606.ENSP00000267163	0	0	0	0	0.124	0	0.900	0.311	0.934
PCNA	TP53	9606.ENSP00000368458	9606.ENSP00000269305	0	0	0	0	0.069	0.486	0.650	0.224	0.852
PON1	SERPINE1	9606.ENSP00000222381	9606.ENSP00000223095	0	0	0	0	0	0	0	0.400	0.400
PON1	VCAM1	9606.ENSP00000222381	9606.ENSP00000294728	0	0	0	0	0.058	0	0	0.392	0.402
PPP3CA	SOD1	9606.ENSP00000378323	9606.ENSP00000270142	0	0	0	0	0	0.271	0.800	0.104	0.858
PRSS1	SERPINE1	9606.ENSP00000308720	9606.ENSP00000223095	0	0	0	0	0	0.120	0	0.448	0.494
PTGS2	SERPINE1	9606.ENSP00000356438	9606.ENSP00000223095	0	0	0	0	0.120	0	0	0.530	0.569
PTGS2	TP53	9606.ENSP00000356438	9606.ENSP00000269305	0	0	0	0	0	0.874	0	0.958	0.994
PTGS2	SOD1	9606.ENSP00000356438	9606.ENSP00000270142	0	0	0	0	0.062	0	0	0.457	0.468
PTGS2	VCAM1	9606.ENSP00000356438	9606.ENSP00000294728	0	0	0	0	0.062	0	0	0.660	0.667
PTGS2	SELE	9606.ENSP00000356438	9606.ENSP00000331736	0	0	0	0	0.065	0.056	0	0.531	0.550
PTGS2	SPP1	9606.ENSP00000356438	9606.ENSP00000378517	0	0	0	0	0.063	0	0	0.508	0.519
PTGS2	RELA	9606.ENSP00000356438	9606.ENSP00000384273	0	0	0	0	0	0	0	0.569	0.569
PTPN1	TP53	9606.ENSP00000360683	9606.ENSP00000269305	0	0	0	0	0.054	0	0	0.405	0.413
RB1	TP53	9606.ENSP00000267163	9606.ENSP00000269305	0	0	0	0	0.056	0.486	0.900	0.823	0.990
RELA	TP53	9606.ENSP00000384273	9606.ENSP00000269305	0	0	0	0	0.062	0.451	0	0.964	0.980
RELA	VCAM1	9606.ENSP00000384273	9606.ENSP00000294728	0	0	0	0	0	0.182	0	0.510	0.582
RELA	SELE	9606.ENSP00000384273	9606.ENSP00000331736	0	0	0	0	0	0.270	0	0.415	0.555
SELE	SERPINE1	9606.ENSP00000331736	9606.ENSP00000223095	0	0	0	0	0.062	0.057	0	0.681	0.693
SELE	VCAM1	9606.ENSP00000331736	9606.ENSP00000294728	0	0	0	0	0.122	0	0	0.916	0.924
SELE	SPP1	9606.ENSP00000331736	9606.ENSP00000378517	0	0	0	0	0	0	0	0.421	0.420
SERPINE1	SPP1	9606.ENSP00000223095	9606.ENSP00000378517	0	0	0	0	0.085	0	0	0.528	0.550
SERPINE1	TP53	9606.ENSP00000223095	9606.ENSP00000269305	0	0	0	0	0	0	0	0.570	0.570
SERPINE1	VCAM1	9606.ENSP00000223095	9606.ENSP00000294728	0	0	0	0	0.062	0	0	0.694	0.701
SOD1	TP53	9606.ENSP00000270142	9606.ENSP00000269305	0	0	0	0	0	0	0	0.553	0.553
SPP1	TP53	9606.ENSP00000378517	9606.ENSP00000269305	0	0	0	0	0	0	0	0.579	0.579
SPP1	VCAM1	9606.ENSP00000378517	9606.ENSP00000294728	0	0	0	0	0.070	0	0	0.618	0.630
TP53	TYR	9606.ENSP00000269305	9606.ENSP00000263321	0	0	0	0	0	0	0	0.510	0.510
TP53	VCAM1	9606.ENSP00000269305	9606.ENSP00000294728	0	0	0	0	0	0	0	0.459	0.459
