# Supplementary material for: Mechanism of Action of a Chinese Herbal Compound Containing Quercetin, Luteolin, and Kaempferol in the Treatment of Vitiligo Based on Network Pharmacology and Experimental Verification
Source: Evid Based Complement Alternat Med. 2022 Dec 16;2022:7197533. doi: 10.1155/2022/7197533 (PMC9788887; doi:10.1155/2022/7197533)
Supplement: Supplementary Materials — Supplementary Table 1. Compounds and related targets genes of Baishi Tablet. Supplementary Table 2A. Summarized vitiligo-related genes. Supplementary Table 2B. Vitiligo-related genes from five database respectively. Supplementary Table 2C. The interacting genes between vitiligo and Baishi tablet. Supplementary 3. Go enrichment analysis results. Supplementary 4. Protein-protein interaction network results. Supplementary 5. Description about compound-vitiligo-target network. [file 7197533.f1.zip › Suppl 5 network.txt]

Node1	Node2	Net	MolName
MOL001924	IL6	target	paeoniflorin
MOL001924	CD14	target	paeoniflorin
MOL000358	PTGS2	target	beta-sitosterol
MOL000358	ADRB2	target	beta-sitosterol
MOL000358	BCL2	target	beta-sitosterol
MOL000358	BAX	target	beta-sitosterol
MOL000358	CASP3	target	beta-sitosterol
MOL000358	PON1	target	beta-sitosterol
MOL000422	NOS2	target	kaempferol
MOL000422	AR	target	kaempferol
MOL000422	PTGS2	target	kaempferol
MOL000422	DPP4	target	kaempferol
MOL000422	PRSS1	target	kaempferol
MOL000422	F2	target	kaempferol
MOL000422	ACHE	target	kaempferol
MOL000422	CALM1	target	kaempferol
MOL000422	RELA	target	kaempferol
MOL000422	AKT1	target	kaempferol
MOL000422	BCL2	target	kaempferol
MOL000422	BAX	target	kaempferol
MOL000422	CASP3	target	kaempferol
MOL000422	MAPK8	target	kaempferol
MOL000422	MMP1	target	kaempferol
MOL000422	HMOX1	target	kaempferol
MOL000422	CYP3A4	target	kaempferol
MOL000422	CYP1A1	target	kaempferol
MOL000422	ICAM1	target	kaempferol
MOL000422	SELE	target	kaempferol
MOL000422	VCAM1	target	kaempferol
MOL000422	AHR	target	kaempferol
MOL000422	PPP3CA	target	kaempferol
MOL000422	GSTM1	target	kaempferol
MOL000492	ESR1	target	(+)-catechin
MOL000492	PTGS2	target	(+)-catechin
MOL000492	CALM1	target	(+)-catechin
MOL001645	PTGS2	target	Linoleyl acetate
MOL002776	PTPN1	target	Baicalin
MOL000449	PTGS2	target	Stigmasterol
MOL000449	ADRB2	target	Stigmasterol
MOL000449	MAOB	target	Stigmasterol
MOL000449	MAOA	target	Stigmasterol
MOL000354	NOS2	target	isorhamnetin
MOL000354	ESR1	target	isorhamnetin
MOL000354	AR	target	isorhamnetin
MOL000354	PTGS2	target	isorhamnetin
MOL000354	PTPN1	target	isorhamnetin
MOL000354	ESR2	target	isorhamnetin
MOL000354	DPP4	target	isorhamnetin
MOL000354	MAPK14	target	isorhamnetin
MOL000354	CDK2	target	isorhamnetin
MOL000354	PRSS1	target	isorhamnetin
MOL000354	CALM1	target	isorhamnetin
MOL000354	F2	target	isorhamnetin
MOL000354	ACHE	target	isorhamnetin
MOL000354	MAOB	target	isorhamnetin
MOL000354	RELA	target	isorhamnetin
MOL004598	F2	target	3,5,6,7-tetramethoxy-2-(3,4,5-trimethoxyphenyl)chromone
MOL004598	ESR1	target	3,5,6,7-tetramethoxy-2-(3,4,5-trimethoxyphenyl)chromone
MOL004598	AR	target	3,5,6,7-tetramethoxy-2-(3,4,5-trimethoxyphenyl)chromone
MOL004598	PTGS2	target	3,5,6,7-tetramethoxy-2-(3,4,5-trimethoxyphenyl)chromone
MOL004598	ACHE	target	3,5,6,7-tetramethoxy-2-(3,4,5-trimethoxyphenyl)chromone
MOL004598	ESR2	target	3,5,6,7-tetramethoxy-2-(3,4,5-trimethoxyphenyl)chromone
MOL004598	PRSS1	target	3,5,6,7-tetramethoxy-2-(3,4,5-trimethoxyphenyl)chromone
MOL004598	CALM1	target	3,5,6,7-tetramethoxy-2-(3,4,5-trimethoxyphenyl)chromone
MOL004609	NOS2	target	Areapillin
MOL004609	F2	target	Areapillin
MOL004609	AR	target	Areapillin
MOL004609	PTGS2	target	Areapillin
MOL004609	PTPN1	target	Areapillin
MOL004609	ESR2	target	Areapillin
MOL004609	DPP4	target	Areapillin
MOL004609	PRSS1	target	Areapillin
MOL004609	CALM1	target	Areapillin
MOL013187	PTGS2	target	Cubebin
MOL013187	ADRB2	target	Cubebin
MOL004624	PRSS1	target	Longikaurin A
MOL004653	F2	target	(+)-Anomalin
MOL004653	PTGS2	target	(+)-Anomalin
MOL004653	DPP4	target	(+)-Anomalin
MOL000490	NOS2	target	petunidin
MOL000490	PTGS2	target	petunidin
MOL000490	ESR2	target	petunidin
MOL000490	MAPK14	target	petunidin
MOL000098	AR	target	quercetin
MOL000098	PTGS2	target	quercetin
MOL000098	DPP4	target	quercetin
MOL000098	PRSS1	target	quercetin
MOL000098	F2	target	quercetin
MOL000098	ADRB2	target	quercetin
MOL000098	ACHE	target	quercetin
MOL000098	MAOB	target	quercetin
MOL000098	RELA	target	quercetin
MOL000098	AKT1	target	quercetin
MOL000098	BCL2	target	quercetin
MOL000098	CDKN1A	target	quercetin
MOL000098	BAX	target	quercetin
MOL000098	MMP2	target	quercetin
MOL000098	MAPK1	target	quercetin
MOL000098	IL10RB	target	quercetin
MOL000098	RB1	target	quercetin
MOL000098	IL6	target	quercetin
MOL000098	CASP3	target	quercetin
MOL000098	TP53	target	quercetin
MOL000098	SOD1	target	quercetin
MOL000098	MMP1	target	quercetin
MOL000098	HMOX1	target	quercetin
MOL000098	CYP3A4	target	quercetin
MOL000098	MYC	target	quercetin
MOL000098	CYP1A1	target	quercetin
MOL000098	ICAM1	target	quercetin
MOL000098	IL1B	target	quercetin
MOL000098	CCL2	target	quercetin
MOL000098	SELE	target	quercetin
MOL000098	VCAM1	target	quercetin
MOL000098	CXCL8	target	quercetin
MOL000098	IL2	target	quercetin
MOL000098	SERPINE1	target	quercetin
MOL000098	IFNG	target	quercetin
MOL000098	IL1A	target	quercetin
MOL000098	MPO	target	quercetin
MOL000098	NFE2L2	target	quercetin
MOL000098	NQO1	target	quercetin
MOL000098	PARP1	target	quercetin
MOL000098	AHR	target	quercetin
MOL000098	CHEK2	target	quercetin
MOL000098	CXCL10	target	quercetin
MOL000098	SPP1	target	quercetin
MOL000098	IGFBP3	target	quercetin
MOL000098	IGF2	target	quercetin
MOL000098	CD40LG	target	quercetin
MOL000098	ERBB3	target	quercetin
MOL000098	PON1	target	quercetin
MOL000098	GSTM1	target	quercetin
MOL001002	CDK2	target	ellagic acid
MOL001002	ESR1	target	ellagic acid
MOL001002	AR	target	ellagic acid
MOL001002	RELA	target	ellagic acid
MOL001002	CDKN1A	target	ellagic acid
MOL001002	MMP2	target	ellagic acid
MOL001002	CXCL8	target	ellagic acid
MOL001002	IGF2	target	ellagic acid
MOL001002	GSTM1	target	ellagic acid
MOL002714	AR	target	baicalein
MOL002714	PTGS2	target	baicalein
MOL002714	DPP4	target	baicalein
MOL002714	PRSS1	target	baicalein
MOL002714	CALM1	target	baicalein
MOL002714	RELA	target	baicalein
MOL002714	AKT1	target	baicalein
MOL002714	BCL2	target	baicalein
MOL002714	BAX	target	baicalein
MOL002714	CASP3	target	baicalein
MOL002714	TP53	target	baicalein
MOL002714	MPO	target	baicalein
MOL002714	AHR	target	baicalein
MOL002714	IGF2	target	baicalein
MOL002714	CYCS	target	baicalein
MOL006992	NOS2	target	(2R,3R)-4-methoxyl-distylin
MOL006992	ESR1	target	(2R,3R)-4-methoxyl-distylin
MOL006992	PTGS2	target	(2R,3R)-4-methoxyl-distylin
MOL003044	NOS2	target	Chryseriol
MOL003044	ESR1	target	Chryseriol
MOL003044	AR	target	Chryseriol
MOL003044	PTGS2	target	Chryseriol
MOL003044	DPP4	target	Chryseriol
MOL003044	MAPK14	target	Chryseriol
MOL003044	CDK2	target	Chryseriol
MOL003044	PRSS1	target	Chryseriol
MOL003044	CALM1	target	Chryseriol
MOL003542	F2	target	8-Isopentenyl-kaempferol
MOL003542	ESR1	target	8-Isopentenyl-kaempferol
MOL003542	AR	target	8-Isopentenyl-kaempferol
MOL003542	PTGS2	target	8-Isopentenyl-kaempferol
MOL003542	DPP4	target	8-Isopentenyl-kaempferol
MOL003542	CDK2	target	8-Isopentenyl-kaempferol
MOL003542	PRSS1	target	8-Isopentenyl-kaempferol
MOL003542	CALM1	target	8-Isopentenyl-kaempferol
MOL003542	MAPK14	target	8-Isopentenyl-kaempferol
MOL004053	F2	target	Isodalbergin
MOL004053	PTGS2	target	Isodalbergin
MOL004053	ADRB2	target	Isodalbergin
MOL004053	DPP4	target	Isodalbergin
MOL004058	NOS2	target	Khell
MOL004058	PTGS2	target	Khell
MOL010489	PTGS2	target	Resivit
MOL004071	PTGS2	target	Hyndarin
MOL004071	CA2	target	Hyndarin
MOL004071	ADRB2	target	Hyndarin
MOL004071	CALM1	target	Hyndarin
MOL004077	PTGS2	target	sugeonyl acetate
MOL000006	AR	target	luteolin
MOL000006	PTGS2	target	luteolin
MOL000006	PRSS1	target	luteolin
MOL000006	DPP4	target	luteolin
MOL000006	RELA	target	luteolin
MOL000006	AKT1	target	luteolin
MOL000006	CDKN1A	target	luteolin
MOL000006	MMP2	target	luteolin
MOL000006	MAPK1	target	luteolin
MOL000006	IL10RB	target	luteolin
MOL000006	RB1	target	luteolin
MOL000006	IL6	target	luteolin
MOL000006	CASP3	target	luteolin
MOL000006	TP53	target	luteolin
MOL000006	MDM2	target	luteolin
MOL000006	MMP1	target	luteolin
MOL000006	PCNA	target	luteolin
MOL000006	HMOX1	target	luteolin
MOL000006	CASP7	target	luteolin
MOL000006	ICAM1	target	luteolin
MOL000006	IL2	target	luteolin
MOL000006	TYR	target	luteolin
MOL000006	IFNG	target	luteolin
MOL000006	IL4R	target	luteolin
MOL000006	CD40LG	target	luteolin
MOL013277	NOS2	target	Isosinensetin
MOL013277	F2	target	Isosinensetin
MOL013277	ESR1	target	Isosinensetin
MOL013277	AR	target	Isosinensetin
MOL013277	PTGS2	target	Isosinensetin
MOL013277	CA2	target	Isosinensetin
MOL013277	ACHE	target	Isosinensetin
MOL013277	PTPN1	target	Isosinensetin
MOL013277	ADRB2	target	Isosinensetin
MOL013277	ESR2	target	Isosinensetin
MOL013277	DPP4	target	Isosinensetin
MOL013277	PRSS1	target	Isosinensetin
MOL013277	CALM1	target	Isosinensetin
MOL013279	NOS2	target	5,7,4'-Trimethylapigenin
MOL013279	PTGS2	target	5,7,4'-Trimethylapigenin
MOL013279	CA2	target	5,7,4'-Trimethylapigenin
MOL013279	ADRB2	target	5,7,4'-Trimethylapigenin
MOL013279	ESR2	target	5,7,4'-Trimethylapigenin
MOL013279	DPP4	target	5,7,4'-Trimethylapigenin
MOL013279	PRSS1	target	5,7,4'-Trimethylapigenin
MOL013279	CALM1	target	5,7,4'-Trimethylapigenin
MOL013430	F2	target	Prangenin
MOL013430	PTGS2	target	Prangenin
MOL013430	DPP4	target	Prangenin
MOL013435	F2	target	poncimarin
MOL013435	ESR1	target	poncimarin
MOL013435	AR	target	poncimarin
MOL013435	PTGS2	target	poncimarin
MOL013436	F2	target	isoponcimarin
MOL013436	PTGS2	target	isoponcimarin
MOL013436	ADRB2	target	isoponcimarin
MOL013437	PTGS2	target	6-Methoxy aurapten
MOL013437	CA2	target	6-Methoxy aurapten
MOL013437	ADRB2	target	6-Methoxy aurapten
MOL013437	CALM1	target	6-Methoxy aurapten
MOL013440	F2	target	citrusin B
MOL001798	PTGS2	target	neohesperidin_qt
MOL001798	CALM1	target	neohesperidin_qt
MOL001803	NOS2	target	Sinensetin
MOL001803	F2	target	Sinensetin
MOL001803	AR	target	Sinensetin
MOL001803	PTGS2	target	Sinensetin
MOL001803	ACHE	target	Sinensetin
MOL001803	ADRB2	target	Sinensetin
MOL001803	ESR2	target	Sinensetin
MOL001803	DPP4	target	Sinensetin
MOL001803	PRSS1	target	Sinensetin
MOL001803	CALM1	target	Sinensetin
MOL001941	F2	target	Ammidin
MOL001941	PTGS2	target	Ammidin
MOL001941	DPP4	target	Ammidin
MOL001941	MAOB	target	Ammidin
MOL002914	PTGS2	target	Eriodyctiol (flavanone)
MOL002914	CALM1	target	Eriodyctiol (flavanone)
MOL004328	ESR1	target	naringenin
MOL004328	PTGS2	target	naringenin
MOL004328	RELA	target	naringenin
MOL004328	AKT1	target	naringenin
MOL004328	BCL2	target	naringenin
MOL004328	MAPK1	target	naringenin
MOL004328	CASP3	target	naringenin
MOL004328	BAD	target	naringenin
MOL004328	SOD1	target	naringenin
MOL004328	ABAT	target	naringenin
MOL005100	PTGS2	target	5,7-dihydroxy-2-(3-hydroxy-4-methoxyphenyl)chroman-4-one
MOL005100	CALM1	target	5,7-dihydroxy-2-(3-hydroxy-4-methoxyphenyl)chroman-4-one
MOL005828	NOS2	target	nobiletin
MOL005828	F2	target	nobiletin
MOL005828	ESR1	target	nobiletin
MOL005828	AR	target	nobiletin
MOL005828	PTGS2	target	nobiletin
MOL005828	PTPN1	target	nobiletin
MOL005828	ESR2	target	nobiletin
MOL005828	DPP4	target	nobiletin
MOL005828	PRSS1	target	nobiletin
MOL005828	CALM1	target	nobiletin
MOL005828	BCL2	target	nobiletin
MOL005828	BAX	target	nobiletin
MOL005828	TP53	target	nobiletin
MOL005828	MAPK8	target	nobiletin
MOL005828	CREB1	target	nobiletin
MOL005849	ESR1	target	didymin
MOL005849	PTGS2	target	didymin
MOL005849	ADRB2	target	didymin
MOL005849	CALM1	target	didymin
MOL007879	NOS2	target	Tetramethoxyluteolin
MOL007879	F2	target	Tetramethoxyluteolin
MOL007879	AR	target	Tetramethoxyluteolin
MOL007879	PTGS2	target	Tetramethoxyluteolin
MOL007879	ADRB2	target	Tetramethoxyluteolin
MOL007879	ESR2	target	Tetramethoxyluteolin
MOL007879	DPP4	target	Tetramethoxyluteolin
MOL007879	MAPK14	target	Tetramethoxyluteolin
MOL007879	CDK2	target	Tetramethoxyluteolin
MOL007879	PRSS1	target	Tetramethoxyluteolin
MOL007879	CALM1	target	Tetramethoxyluteolin
MOL007879	ACHE	target	Tetramethoxyluteolin
MOL009053	F2	target	4-[(2S,3R)-5-[(E)-3-hydroxyprop-1-enyl]-7-methoxy-3-methylol-2,3-dihydrobenzofuran-2-yl]-2-methoxy-phenol
MOL009053	ESR1	target	4-[(2S,3R)-5-[(E)-3-hydroxyprop-1-enyl]-7-methoxy-3-methylol-2,3-dihydrobenzofuran-2-yl]-2-methoxy-phenol
MOL009053	PTGS2	target	4-[(2S,3R)-5-[(E)-3-hydroxyprop-1-enyl]-7-methoxy-3-methylol-2,3-dihydrobenzofuran-2-yl]-2-methoxy-phenol
MOL009053	DPP4	target	4-[(2S,3R)-5-[(E)-3-hydroxyprop-1-enyl]-7-methoxy-3-methylol-2,3-dihydrobenzofuran-2-yl]-2-methoxy-phenol
MOL009053	PRSS1	target	4-[(2S,3R)-5-[(E)-3-hydroxyprop-1-enyl]-7-methoxy-3-methylol-2,3-dihydrobenzofuran-2-yl]-2-methoxy-phenol
MOL009053	CALM1	target	4-[(2S,3R)-5-[(E)-3-hydroxyprop-1-enyl]-7-methoxy-3-methylol-2,3-dihydrobenzofuran-2-yl]-2-methoxy-phenol
MOL009053	ACHE	target	4-[(2S,3R)-5-[(E)-3-hydroxyprop-1-enyl]-7-methoxy-3-methylol-2,3-dihydrobenzofuran-2-yl]-2-methoxy-phenol
